# Supplementary material for: Association Mapping of Insecticide Resistance in Wild Anopheles gambiae Populations: Major Variants Identified in a Low-Linkage Disequilbrium Genome
Source: PLoS One. 2010 Oct 1;5(10):e13140. doi: 10.1371/journal.pone.0013140 (PMC2956759; doi:10.1371/journal.pone.0013140)
Supplement: Table S1 — SNPs used on the 1536 Illumina array. Full list and description of SNPs on the 1536 Illumina array. (0.46 MB XLS) [file pone.0013140.s003.xls]

## Sheet: SNPs on 1536 Illumina array
Table S1. SNPs used on the 1536 Illumina array
*Key	I=intronic	NS=non-synonymous coding			D=downstream of nearby gene
	IG-intergenic	S=synonymous coding			5 or 3= in 5' or 3'
	U=upstream of nearby gene				UTR=untranslated region
SNP name	Flanking sequences (for probe design)	SNP	Chromosome	position v48 (Ensembl/Vectorbase)	rs number (where available)	comment*	Control SNP (1=yes)	scored successfully and used in present study
AGAMP3_2R_52616	AATGACACGACTgttttttttatatctgatagtttttttGATTGGCATCCAGCTATTGGT[A/G]AAACAGGAAAATGAAATATTTTATTTAATGAAAAAGTATTTATTGATCGCTCATTAATCG	[A/G]	2R	52616		IGD	0	0
AGAMP3_2R_55459	CTAGGTGTAATGGTTGCAGGGTTAGTCTAAAGAAAAATCCCTTTGTAATATCATTCTATT[T/C]CCTTTTTAATGCTCAATATCACGAATGTAATACTGACATTCTTACATGAAGTAACAAGAG	[T/C]	2R	55459		IGD	0	0
COEJHE20-snp1	ATAGTAACCGATTTCGGATCCCCTCCAAAAGAGGCTATGTTCTCATTAATCCATCGTAGG[A/G]CTAAACTTTGATCCTTTAAACCATTATTTCCTGGACAATCCACTTGTTCAGTGCTTAGAA	[A/G]	2R	57144		NS	0	1
AGAMP3_2R_57758	TATTACAGATACTTCATAAATTTAAATTATTTAAAATGCTTTCTTATCACTATTTAAATG[T/G]AATAGATTAGGAAAGTCGTAATTACGTGCATTGTAATAATCGGCCTTAGCACAATTTTTC	[A/C]	2R	57758		I	0	1
COEJHE20-END-snp1	YAAGTGGTTATGATTATATGGATAAGTGATAGTTTCAAAAGTGTCTGTTTTATGATATTG[A/G]GCTAGAGTTTATTTCACTGTTAAAAAGCCATGTGTTTCAGCTTCGCGTTGCAAAAATGGA	[T/C]	2R	60097		IGU	0	1
COEJHE20-D-snp1	TACAGTGTTGTGTGACAATTGTAGAAGGTGTGGCTGTGATTGTGCGATCGGATAGATTGC[T/C]TAGCAGTAAAAAGACCGTAATCGATAAAAAATGTAAATGTATTTCGGTTATGCTTATTAG	[T/C]	2R	64898		IGU	0	1
AGAMP3_2R_1618148	GGAAAGTACCTTTGTTTAGTACTCCTCAGCGCCTTCGCCCTCACCCTCGCCGGAGTCCAT[A/T]CCGACCTCCTCGTAGTCCTTCTCGAGGGCGGCCAAATCTTCACGGGCCTCGGAGAACTCA	[A/T]	2R	1618148			1	0
AGAMP3_2R_1624081	TGAGTTCTCCGAGGCCCGTGAAGATTTGGCCGCCCTCGAGAAGGACTACGAGGAGGTCGG[A/T]ATGGACTCCGGCGAGGGTGAGGGCGAAGGCGCTGAGGAGTACTAAACAAAGGTACTTTCC	[A/T]	2R	1624081			1	0
TUB-A-D-1	CTTCATCTTCCGTTAGATCAATAACGGGWTCGGCTATTTTGGCAGCCACTTGTGTCGGCA[T/G]CTGATATTTGATCGGCGCTATCAACTTCAGCGCTGGCGGATAAACTTCGGTGAATCTTGG	[T/G]	2R	1627870		NS	1	1
AO-UP-snp1	AACGCTCGAAGTTGAACGTTTGAAGTTGAAACTTGTCCGGGGCCGTGGCACGAGTTTCGC[A/G]CAWYGCACCAGCAAGCGCCACGGCATGAATTCTCATTCTCCCCGCCAAACCAAMCCCAAA	[A/G]	2R	1878393			0	0
AGAMP3_2R_1881879	GATACGGGGAGCGAACGAACAGTTCGACAAGGAAGCTTGATGGTTATGCTCGTGCAAGCG[T/G]AAATGGTTTTCCTTCCGAGTGAATAACCCGCTTGTTCTAGCGAGGATGACAATTGCTGAT	[T/G]	2R	1881879		IGD	0	1
AO-snp1	GGGTGGCTCGCTAGACSCGYYACYACAAACCGTAATRCATCTTAAATCGTGGGTTGTTTT[T/C]TTCCGCTCATACAGAGTACAAGGAGATTGTGACGGAGAGCATCCGACTGGTCGGAGGACA	[A/G]	2R	1883571	rs5478159		0	0
AGAMP3_2R_1888295	ACAGCTGCGACCCGCATACAGGACGCGTGGAGAATGAATGAAGAGATTTAGCCAGACATT[T/C]GGCCACTTGAGAAGATTTACTTTGATTGACCAGAACCGGAACCGGGGTCTGCCCTTGTGG	[A/G]	2R	1888295		IGU	0	1
db5581514	CTGCATGCAAGGAATTTATCAATCAGTATCCACTACGAACGAGAATAATAATAAGAAACG[C/T]ACCATGATCGTCCTCGTTCCAGTGTGGGTAAAACCCTATTGCATAAAATATGTTTATTAA	[A/G]	2R	2531671	rs5581514	IG	1	1
AGAMP3_2R_2763905	AGTGATAAATTATTATTATTGGAAGGCGATAAAATCTATTCAAATTAGTTCTTTCTTTTC[A/G]CCAGCCGCTAGACGACCCTCGAGTGCCCTCGTCACTTAGGGGCCACACCACGTGCCGTTC	[T/C]	2R	2763905		IG	1	1
AGAMP3_2R_3258589	CAATCGGGCCAAAATCGCTGTGaaaaaaaaaCATCTGCAAGGAAGTTTCGTCTACAGCGC[T/G]CTTCTTGGAaaaataaaattaaattaaatacggtttaaaaaaaagcaaccaaaaaGATTG	[T/G]	2R	3258589		IG	1	1
AGAMP3_2R_3439809	ACGAACTCCTCCCCTCCTCCCCTCAAATGCTCTCACCACATGTGCGCTGCCTGTGTCCGC[T/C]TTGCAAAAAGGCTCGTCCTCGTCCGTAGAAGGCACGGTTACCAACACAGACACAACACAG	[A/G]	2R	3439809			0	0
AGAMP3_2R_3441737	GATTGGAAGGAAAAACATGCATCGCTCATCGTTGTTGACACAGCGTTACACAGCCACATC[A/G]TCGCACCCAGCATGCTGGTGGGTCCCGGTAAACCGGCCACGCTCCAACACGCCACACCGA	[T/C]	2R	3441737		IG	0	1
AGAMP3_2R_3442591	TACGTGCTTTGTTtgtgcgtgtgtgtgtgtgtgAGCCTTCCACACACTCTGCACCGGAAA[C/G]AGTCTGTCGGGAGTCACGTACGCAGAAGGACGTACGGAAGACAAATAAACCAGCGAGCAA	[C/G]	2R	3442591		IG	0	1
AGAMP3_2R_3453821	AAGCTATTGCAGAAAGCTTTTAAACTGTTTACCTTGTCCCCGGTrTTGCCTTACCAGCGA[C/G]CGCTTGtctctctctcactcactctctttctctcttgctttctcgcactcgctcacacac	[G/C]	2R	3453821			0	0
AGAMP3_2R_3456307	GTACTGCGGCTGGTGAGAACTTCATCTTCGTGTTGAGTAACGAGCCGGTAGACCTGTACC[A/G]AACCAACTTCCATGCTGCCAGAAGGCTAGGTCCCGGCTAGGTAAAGTCAACGAAGACCGT	[T/C]	2R	3456307		IG	0	1
AGAMP3_2R_3458202	CCATTCACGACCCGGTCCGCCACGGGGTCGCCACGGGATAAGTGATTGAAGCATCATCTT[T/C]GGTTGGGTTTATTtgtgtgtgtgtgtgtgggggggggTTACTTGTCCACTTGCTGGCCGT	[A/G]	2R	3458202		IG	0	0
AGAMP3_2R_3459230	GCTTAACCAGCTGCACTCGTTCACATACATACATTCCGCACAGCCCGCAAACCCGTACAA[T/C]CCGGCGTACGAATCGATTGTGACGCCCTGCCAGGGTAATTACTACTAAATGTTTCGCTTT	[T/C]	2R	3459230		IG	0	0
AGAMP3_2R_3463029	GAGAGCATCCGAAAACTTTTTCAATCGAGTGCTCTCATATGCTCGTTCACCATACACCGC[A/T]CsGGTTGGGTTTCAGCCAGCTACTGTTACTAACCGGCTCGCATCGGCTCGATGACGTAGT	[T/A]	2R	3463029			0	0
AGAMP3_2R_3467223	TACTCTCGCGCTCATTTGCAGACATTGTGGTGTCCGACGGTGTCGCGTCGGTTTGCCAGC[C/G]ATTCCAAAAGCAGTCAAAACAAAACCAGCGACACACACTACACACAGCGGACAGCGAGAG	[G/C]	2R	3467223		IG	0	0
AGAMP3_2R_3470980	GCGCAGACGATGGTTTCCATGGCAGATCATTATCACTAGCAGAATGGCACCGCCGGGGAG[A/C]AGCGTAACCGAATTAAACAGCCGAGCAAAGGAAAAACTTTCAATACCGAGGAGAGGCATT	[T/G]	2R	3470980		IG	0	1
AGAMP3_2R_3476200	CTCGAACATGAATCCCCGGCCCAGCACACATTCAGACACACATTCCCGCAAGCCTTCCGA[T/C]GGCGTTGCATTCGATCGTGCGAATTGCAAGCGCACTGCGGGCGGAGCAAACAATCGACAC	[A/G]	2R	3476200		IG	0	1
AGAMP3_2R_3478791	AATTCGTTAATGTCAAACAAGGCTTCCTTTTAAAATGTGTTGTGTGCTGTCGGCGCATTT[T/C]TGCTGCGGCGAGTGACAAAAACAAACCCGAGCGACAACAGGCACTGCAACACACCGGACC	[A/G]	2R	3478791		IG	0	0
AGAMP3_2R_3479010	CCCGTTTTCCACACTTTTCCACAACCGGGGACCAGGGAAAACAAACAGCACGGTGAGGCC[C/G]GAGAAAACAATCCTTCACCATAATTTTACGGCCACGAGAAGCTTTTCTTTCTGCCGTGCA	[G/C]	2R	3479010		IG	0	1
AGAMP3_2R_3491292	GGCTCCAGACCTACCAAGTCGCCTACCATTACCTACCCACCACCGACCACTACTCACACA[C/G]CATTATCACTTccgccgccgtcgccgccgccgccgacgccgccgacgccACCACCTTCAC	[G/C]	2R	3491292		I	0	1
ACE1-CAM-85	CGTGGACACCGTGTTCGGCGACTTCCCGGGCGCGACCATGTGGAACCCGAACACGCCsCT[C/G]TCCGAGGACTGTCTGTACATTAACGTGGTGGCAC	[C/G]	2R	3491989		S	0	1
ACE1-MACE	CGCGRCCCCGGCCCAAGAAyGCGGCCGTCATGCTGTGGATCTTCGGCGGC[A/G]GCTTmTACTCCGGCACCGCCACCCTGGACGTGTACGACCACCGGGCGCT	[A/G]	2R	3492074			0	0
ACE1-CAM-128	TGTCGCTGCAGTACCGCGTGGCCAGyCTGGGCTTCCTGTTTCTCGGCACCCC[C/G]GAAGCGCCGGGCAATGCGGGACTGTTCGATCAGAACCTTGCGCTACGGTAGGTGTC	[G/C]	2R	3492202			0	0
ACE1-EXAG3-620	TTCTTCCCATCACTTCTTGGGAGTCAGMTGGGTGCGGGACAACATTCAYCGGTTCGGTGG[T/C]GATCCGTCGCGTGTGACACTGTTCGGCGAGAGTGCCGGYGCCGTCTCGGTGTCGCTGCAT	[A/G]	2R	3492302			0	0
ACE1-CAM-327	GTGACACTGTTCGGCGAGAGTGCCGG[C/G]GCCGTCTCGGTGTCGCTGCATCTGCTGTCCGCCCTTTCC	[C/G]	2R	3492401			0	0
ACE1-CAM-623	GCTGAGyGATGCGGTCGAGTGTCTGCGCGGCAAGGA[T/C]CCGCACGTGCTGGTCAACAACGAGTGGGGCACGCTCGGCATTTGCGAGTTCCCGTTCGTG	[T/C]	2R	3492697	rs5600315	S	0	1
ACE1-235-696	CGTCTTCTTGAAGCGCCCGCTGGCGAGCGAACGCTGCGGCGTCTCGTCCAGGAACGCACC[A/G]TCGACCACCGGCACGAACGGGAACTCGCAAATGCCGAGCGTGCCCCACTCGTTGTTGACC	[T/C]	2R	3492770		NS	0	1
ACE1-73-858	CGCCTGCCGGGCCGCCCCGTTCACGTACGGGTTGAGCTCGCGCACCGCCTGCAGGAACTC[T/C]TCGCGCGTCACGGTCACGCCCTCCTCCTTGCGCAGCAGCTCGGTCAGGTAGTAGATGATG	[A/G]	2R	3492932		NS	0	1
COEace30-ACE1-snp1	CAACTACGTGTTCGGCGAACCGCTCAACCCCACCCTCGGCTACACCGAGGACGAGAAAGA[A/C]TTTAGCCGGAAGATCATGCGATACTGGTCCAACTTTGCCAAAACCGGGTAAGTGTGTGTG	[T/G]	2R	3493273		NS	0	1
AGAMP3_2R_3499488	ACATTCACAATTCTTTGACCTGTGTACTAAGAACGAAATATGTACGTGCGGCACACCATT[T/C]TAGGCATCGCGATCGCTTGCACTTGCAATCCTTCCCCGCGAAACCCCAGTATTTGTAGAT	[A/G]	2R	3499488		IGU	0	1
AGAMP3_2R_3499802	CGTAGCAGCACTTAATGAGAGATGTAGTAGCAGTTAATCAATAACTAGATGCGGCGGCGA[A/C]AGAGAACAAATTGATCCTTTAAGTACACACTCTTTCTAAATACAACCTATGTTTGTGCGG	[A/C]	2R	3499802		IGU	0	1
AGAMP3_2R_3505428	ATAAACATAGTAATGGGTGTAATCGAAACCGGGAACAAAAGACAGAAAACCCTCGTATTG[T/G]GAGGGCAAATAGGAAyTAAAGCTAGTATAAGAGAGGAAAAAATGTGGGTAAGAATAAAAA	[T/G]	2R	3505428		IG	0	0
AGAMP3_2R_3509281	acactacaaaaAGAGACTGAAATACGAAAACCATCACAAGCGCGCATCATAAGCGTGATT[T/C]TCTCTTTAAACCTATCCATTGATCCCATTTTAAAATGTACTTGTCTTCTTATTGATAATC	[T/C]	2R	3509281		IG	0	1
AGAMP3_2R_3509715	AGCGttttttttttCTTCTTTATGTTTGTTTTGTTTGTTACGCATTCGTTGCATTCGGCA[A/G]CGCAACATTGAACACAACTAAAATCTACCGGGAGCGAATGAGCAATTGGAGGGAGAGGAA	[A/G]	2R	3509715		IG	0	1
AGAMP3_2R_3511672	AATTTTGTAGCAAATCTTGCCGTACTGTTGACGTAGTGCCATTGTCAAACGCGCCATTGG[A/G]CATTGGAATAAAAATGTTCCtttttgagatttttttttcctttttttGGTTGTTGCATAA	[A/G]	2R	3511672		IG	0	1
AGAMP3_2R_3514242	CGCTTGGTGCGGTGGTGGATGCGGAACGGCCAGTGCCGGCCCAGCGGACGAGGCAAAGCC[T/C]CCGAAATGCCCGCCAATACCGCAGGTCTGTGCAAACGGTTGCGAGTACACGCCATGGACC	[T/C]	2R	3514242		S	0	0
AGAMP3_2R_3514390	TCAAGGTGTTAAAGAGCTCCAGAGCAGAGAGCGCTGCCGTCCCCTCACCTGACACGGTGG[T/C]AAGTGCGGTGCGGCCGGGTGCCCGGAGCAGATTGAAATGTGCGGCCCGGCCGAGTACGTC	[A/G]	2R	3514390			0	0
AGAMP3_2R_3519112	ATAGAGTCAAATGTATGCACAATGCAGCTTCGAATCGATTGCAAATGCCACTCGGGCCAC[A/C]GATATGTGAGGAATGGTATCAACGTCGTCAAGGTGCGGGTAAGTTAACGGACAACAGGGG	[A/C]	2R	3519112		IG	0	1
AGAMP3_2R_3534904	GTGGTTGCAGTGGAAAAAAGGAGTAAGGGAAAGAGAGCAGAGAGCACAGGGTGGAGGAAG[A/T]TTAGGTAGGaacaaaataacaaaacaaaaaaaaacaaTTACATTTCAGTTAACAAACGAT	[T/A]	2R	3534904			0	0
AGAMP3_2R_3535954	ACAGTACGAAATAAATTACATAGTAGTTATGTTCGCAATCCTAACAATCGTGTATCCTTA[A/C]GGCTAGTATTATTTTAATAACGATAATTTATAATTACAGCCACTCATCACCACTTACGCT	[A/C]	2R	3535954		IG	0	0
AGAMP3_2R_3540082	TGAATTTTACTGAAAACAATCTACGCCCAGGCAACCGTGCGACGCTTACCGGTCTGAGCT[T/C]TGAGTAGCTAAGAAAAATGAACAGCGGAAACCTTTCCTGCGGGGCGCAGGAAGCGTGTTG	[T/C]	2R	3540082		IG	0	1
AGAMP3_2R_3540395	tttggtttttggttttGCACACATCATAATGCGAGTAATCCTTCGCCTAAAGCCACAGCA[T/C]AGGTACACGTGTACATATGTAGCATGATCACCGCCAACACCGCCACACAAAACATGCTAA	[T/C]	2R	3540395		IG	0	0
AGAMP3_2R_3551847	TTGTAACGAAACTCCCGCATCAGACGGCAAAATGCTTTTGAAGAGCCGGCACCATTAGAA[T/G]TACCCCCGTTTGTCCCGATCTGAGGTAATAGAAAACGAATGTTGCCATTGCAAACCGATT	[T/G]	2R	3551847		IG	0	1
AGAMP3_2R_3761125	CGGGTGTAAAGTGAACGATAGTAACATTTTAATTCGTCATTTGAATAAATAAAGACGTGC[T/C]CCGCTCGGTTCGCCATATCGGGCTTCAAacacacacacacacGCGCGACGTGTTGTTCGA	[A/G]	2R	3761125		IG	1	1
AGAMP3_2R_4251882	tctctctctctctctcgtactcttgctctctatctctcCACTCCCTTGTGAAATGGCTGA[A/G]GAAGGTGAACAGTTCCTTAGAACAGCACGAAATCGAATCGAAAGAAATGAACACAAAGGC	[A/G]	2R	4251882		IG	1	1
AGAMP3_2R_4749374	attcacgttatttttttttgttcctggttttttttGTCGTTTGTTGTTCCGTAAATATCT[A/T]TTCATTCTTACGGTTGATGGATGTGTTTTGCACGCAGAACACAAGAAAAGGAAAATATCG	[A/T]	2R	4749374		IG	1	1
GLUCLa-2-snp2	AGCCCTCSCCTASACATACACTGACCGAAGACCGAACGAAGGCTGCGATAGACCGTAGTC[C/G]ATGATAGATCCGTGTTTCATGGCCCTCGTCGACCAGCCCTTTAACCGTCGGTCCGTACCG	[G/C]	2R	4855858		I	1	1
AGAMP3_2R_5054534	AACTACAAGATGTATTTAATATATCTGTACTTAATAGATGTGTACATTACTGATGAGATT[T/G]AACCACTTCCAGGCGCTTACTATCGCCCCTTTGTCGCCATTTGCTTAACGTTACCTCCGA	[A/C]	2R	5054534	rs5223468	I	0	1
CHITIN-D-snp1	CCTGAAGCTGGAGGATTTAACCATGAAAATAGCTCTCACGATGAAGATTTCCAACGGACA[T/C]ATGGTGCGGCTGAAGCGAAGACAATAAACATGTTCGTTTGATAGGGTTTGATTTTTCTAT	[A/G]	2R	5058712	rs5596813	S	0	0
CHITIN-D-snp3	GCTGCGCAACACTTTCAGCARCATTATCTTCATCGAAATCCAAGCGTACCGTAAACCTAC[A/G]CAATTCCGCGACCCAGCACTGAACGGTAGCAGGGCAAACGGGTCGTGCCGCAGTCCTTCG	[T/C]	2R	5058850	rs5596308	S	0	1
CHITIN-D-snp2	GCCGTCKTTGGACGAAGAACGACGGCCGAAGTGGAYCTGGGACAGTATCGCCTACCGGCG[A/G]ACATCGATATCGTCATCGATATTTTCGACATTCATCGCAATCCCGCCTACTGGGGTTCGG	[A/G]	2R	5058999	rs3347608		0	0
AGAMP3_2R_5059435	TAAAATCATCTTCGATGGTCGGCAAAACTCTTCCAGTGCTTTCGTTTCCTTACGGTACAC[T/G]GAGGTCCACCGGTAGAGCCACTGTGGATGAAGGAAAAGGTTGACCGCCCGGATGGTCACG	[A/C]	2R	5059435			0	0
AGAMP3_2R_5061557	CCTTCTTGGAACAGCCCCCAAATTACACACATCTTAACTGAGCGAAGGCCAAATGGTGGT[A/T]TCTACGCGCGGGGCAAACCACCACTACGTTTGACGCGCAACCCTTGGGACGGGGCGATGC	[T/A]	2R	5061557			0	0
ACTIN-68-rs5538285	GTGTACCGGTTCTCGAAGATCATCGACTCCTGCACGGCCTGGTGGATCTT[T/C]TCCAGCTCCTCGATGCTCGGCTTGTACGCGTACACCGCCTGCTCGTACTC	[T/C]	2R	5647242	rs5538285	S	1	1
AGAMP3_2R_6266215	GATGGATAGACTCATCAAGCAATGCAAGCAGCAGTGTGTGTTGGGTGCCGCTTTGGCGAG[C/G]AGAAAATCAATATCACTGAAGCGATAAACGATTTTATAGCCAATGGCGTTAATGACTCCC	[G/C]	2R	6266215		I	1	1
1571-280	AGAGGWACTGCGACTAACGACTCCAATCTCACAGGTTAGCGGTAGTAAGT[A/G]CGGCGTTCGATTGTTAGAGAGGACGYTACGAAGGGATAGGACCGAATG	[T/C]	2R	6353110		3UTR	1	1
CHITIN-3-snp1	ATCTCCCTCCAAAMCCCGCAGGTCTTCCACGTATGTGCCCTGACGGACGA[T/C]GGACTGATCATGAAATCGTTCCTCTGCCCGGAAAGCACCCTGTTCGACCAGACGGTGCTG	[T/C]	2R	6568270		S	1	1
THR-1	GYATGSCTGGTAGTAGYGTAACGGCCGCGAAGGAACGTTGCCTGTATGAAGCCGTRCTSAAGCACAATCATCGYTTGGCGCACAACGTGCGAATGTGGCGTACCGTGCGCCAGTTCCTGGAGCGTACAAGACAGAAGCGAATGGY[C/T]GTCTGTCCTCCGTCGGTGGTTCTAGCRAGGGAAGCGTTCAAGCATCCGTCCGAGTCCTTCTCCCTGGAGGATCCYATCAGCGAGTACTACGCCGATAGTAGTGATGTTGASGGMGAAAGCGAGTGTAGTAGCAGTCGTAGTAGTATCRTWGAGGAAACWGCTAGCCAAGTTGACRTGARAGGCCGRAAAGGCACAAACAGCASCCCGYWTGMTGGGACTACTACTATCATCATYCATGAYTCCGAAGAT…	[A/G]	2R	6677833	rs5307849	S	1	1
AGAMP3_2R_7261743	GTATCGCAAGCAACGATGTTAATTGTCTCAGAAGGTTTCCGGGGAAGAGATGTTTTACGA[T/C]GTATTTCTTTCAATATTTCTCGTTCagagagagagagagagaAGACAGGAAAACAGATGC	[T/C]	2R	7261743		IG	1	1
AGAMP3_2R_7753352	GTCCCATGAGTGTGGTTGGGAATTTCTTCCCCAGCGTGCGCGGGCTACCGTACGCGATCT[C/G]CACTCTGCTGAGCCTTTCTTCTGTCTGCACTTCGCGGTCAAAGACGTTCATTCATAAACC	[C/G]	2R	7753352		IG	1	1
AGAMP3_2R_8261352	CCGGCTGCTGGGTTGATTACCACCTTCTCCATTCAAGTATTGGCCATAAAAAGGATCAAG[C/G]GCACCCACTTTCGGATGGGCGGTGGTGTGTATGTGAGGTTCATACATCATTCGTTTATAG	[G/C]	2R	8261352		I	1	1
AGAMP3_2R_8778879	TTAACTTACATCAAACCCTGGAGTGCGCAGTATTTCGTTGTaaaaaaaaGATATATGAAA[A/C]TGGGTAAGAAAACGCTAACCGACCGGAGAAACAAACCAAATCACTTGAAATAAACCACCG	[T/G]	2R	8778879			1	0
COEAE2A-U-snp1	GCAGCAGTCGGAAYTCTTTTCSCTCGGCCGGTATGAAATGTTTCTCGTAATGTCACCGCT[A/G]CTTTTCTCGGTAAGTTGAAGTGTTGTTTGTTGTGTGGTGGWCCCGGTTTAATAACACATK	[A/G]	2R	8924292	rs3337607	NS	0	1
AGAMP3_2R_8926560	AACCGTCCAAATCACCGAGGTGGACGAGGGGCTGGACGGTGAGACGTTCTTCCTGTACGT[A/G]TTCCTGGCCGCGATCGTGATTCTGCTGCTGGTGCTCGGCCAACAGTTCCTCGGCTCGTAC	[T/C]	2R	8926560		S	0	1
COEAE2A-snp1	GTCGCGGCCCATTATTAACACGAGCGGCGGCCAGATCCAGGGCATAACGGCCAGCTGCGG[A/G]CTGTTCTGYAGCTACTTTGCCTTCAACGGCATCCCGTACGCGCAGCCRCCGGTDGGYGAB	[A/G]	2R	8928924	rs5561182		0	0
COEAE2A-snp2	GAAGGATGGCAGCGAGCACCGCAGCACCTGCCCGTCCGGCGGCTTCCTGGGCGGCGTGTC[C/G]GGCAGCGAGGACTGTCTCTACCTGAACGTGTACACGCAGAACCTGATCGGGTCGCGSCCG	[C/G]	2R	8929089	rs3337410	S	0	1
COEAE2A-D-snp2	ATYTTYTTTAATAACAGTACACRCCCTYTCYMACGCTTATTACATTATTCAGATTATGAG[T/G]AGGAAGATGCGCGGACCCTCCCCAAGGGCTTAGTTTCTCGGGAAGCGGAACGGATCGTTG	[A/C]	2R	8930523			0	0
AGAMP3_2R_8933085	GAATCCTCATCTGTTCGTGCCGTTCTTCTGGAATGTTGGCGCTGGTACTGCCGCCTCGAG[T/C]CAGATCAGCGGCGCGTTTCGCGAGCACTACTGGCAGAGCCGACCGTTGGACGCCAGCCTG	[A/G]	2R	8933085	rs3336642	S	0	0
AGAMP3_2R_8933268	CAGGCTGCACGCGCAAACGACGCCCGCTCCGCTGTACTACTACCAGTTCGCGTACGACGG[C/G]GATTTGAATCTGTACAAGAAGCTGTTCGGCGTGCAGCACCCGGGTGCGATACATACGGAC	[G/C]	2R	8933268		S	0	1
COEAE1A-D-snp1	ACCYTWRGGGGGGTAATTAATACTACAGCGTTCG[A/T]TTACAGAATCTTCACGAAGCTCACGCCCGGCTTCGGGTGTATTGCTCGCATGTGCAGCTG	[A/T]	2R	8937946		3UTR	0	1
AGAMP3_2R_9267632	AGATCATTTCAATCAAGCTCAGCGCACAACATTGTTGCGAAAGAAAATCACTTTTGCCGC[A/T]GTGAATAAGGGCAGAGTTACGGTAGCCGAATTTTAAGAGCTATGGTTCCAGCAACAAAAA	[T/A]	2R	9267632			1	0
AGAMP3_2R_9749750	AGCTCCATTGTGTTGCCTTTCCACTTTTTCCACGAACATTCTTTATGAGTGCATTCTTTC[T/C]ACAGCTGGCGAAGAAAGCCCACATTGTAGTGCAGCGGCACTGCTGGCGAAAGGATTCGCT	[A/G]	2R	9749750		IG	1	1
AGAMP3_2R_10259071	AAAGTAGTGGGGCGTGATTTATATTTATAAGGACGACGATGACGACTGTTAGAGCACAGT[A/G]ATTGATTAATTTATTGAACGATAATTGTAAACACACGTATGTTTGTAACATTGTGACAAG	[A/G]	2R	10259071		IG	1	1
AGAMP3_2R_10762687	TCAACGCTACGGTACAGCTCCTGCCAGTGCCTTCCGTAGGTGTTTTGGGAGATGAAAAAT[T/G]GAACAGATTTCAGCCTCATTTTTCCAGCCCGCTGATATGATTATTGAAGTGGCAGGAAAT	[T/G]	2R	10762687		IG	1	1
AGAMP3_2R_11117308	GCGGGACAGCTGGTCGGCCAGCACGGCCGCCACGATCGAGATGTACTGCTTCTTGTCCTT[C/G]GGCGTCTTCTGCTGGGCGTAGTTCTGCAGCACGAAGAAGTTGCCGCCGAACCGCTCGACG	[G/C]	2R	11117308		S	1	1
PERIOD-176-rs3343228	ACGACACGCTCAAGGAGGCGAAGATGGTGGAGGAGCAGATACTGCG[T/C]CTGCTGAAGGAACCGGTCGCCAAGCCGTCSGACATGGTGAAGCAGGAGGT	[A/G]	2R	11453855	rs3343228	S	1	1
CYP4H14-UP-snp1	TGTTCATACAATTAGAGCTATTAAAATACTTTTACAGCAGAGGATAACAATTTCTGTTCC[A/T]ATGGAATTGTGACAAGTAAACAAGAGATGAGTGTTTTCAGTGTGGCCAGATTATTTTGGC	[T/A]	2R	11504727		IGD	0	1
CYP4H14-213	CGGATTGCGGTGGATCACGTAGATCGGCACGAGGACGTTCTGTCCCGCCGGAACTGTGGT[A/C]CCATCTGTGGAGGGAAATGAATTCAGGGGGAGCTTAWTGAAGGGAAAGTTCAAGGCAAAT	[A/C]	2R	11508767		S	0	0
CYP4H14-313	AAGGGAAAGTTCAAGGCAAATGAGGTGTCCCATTTACTCACTCAGCTCCAAGTCTTCCAC[T/C]AGCGCCCGCCCAATAATGCCRACGGGTGGATACATCCGCAGCCCTTCCTTCACCACCAGA	[A/G]	2R	11508867			0	0
AGAMP3_2R_11509282	TCGAACGCCACATTTTGTGCCTTCTCCTTGGCGAGCTGTTCGCGCCGGCTTCGTATCACG[T/C]TGTCGGTGAACGCGTGCAGCTGCTTGATGACCCTGCGCTGCTCCCAGGCGTTCGGGTGGA	[A/G]	2R	11509282		NS	0	1
AGAMP3_2R_11515950	AATCACCGTTCGCCAGCATCAGCTCACGTTGGACTGCACCACCGTTGAATAGCTTCCATT[A/T]TAAAGAGAAAAACCCTCATTCCAAACCCAACCCCTCCAAGTTCGATTAGTACCGTTCGTC	[A/T]	2R	11515950		IG	0	1
CYP4H15-UP-snp1	AAAAGGTTGAAATGGCTTTTTTCATTAAAAGTAAGTTTCAACTTACCGCAACAAGAATGT[T/C]GGACGAGAAGTTGTTGGGCGCGTGATGCTTTGTGTGTGCCTAGAAGAACCGTAATGTCTT	[A/G]	2R	11609476			0	0
CYP4H15-snp2	AGTCTTCACCTCGAGCATCGCATACCGCTGTCCGATACAGTTACGAGCGCCGACACTGAA[T/C]GGAATGTAGCTGTAKGGYTGTCGCTTTTCCGAAGCTTCCTCACTGAACCGCTCCGGATCG	[T/C]	2R	11615601			0	0
CYP4H15-snp3	TCTTGGGACAATCTTWACAAACGTACCATTCACCGGYTTCAGCGTCATGTCTGTTTTGAT[A/G]CGCAGCTTATTACTTTCTTCACACGGCAAGAATCGATAGTTGGCCACCAGCTTTACGAGC	[A/G]	2R	11615724			0	0
Cyp4H25-snp1	GAAGCTGAACACGCAGCAGCAACCCAACTCGGAGTATGTGATGGCAGTGAAAGAGTAAGC[A/T]TCGAAWGACTCAATATAAAGTACGAAAAATGTTYTAMAATTKYCCGTAACATCTTTCAGA	[T/A]	2R	11617789		I	0	1
db5418917	CGGTACGGATGGATTGATCCGAAGCGTCTCCTTTATCACCATGTCAAGGTACTTCAGTTC[C/T]TGCAGTGTGCCGTAGGTAAGCTCTTGAGTTTTGGCATCCGGGCCCACGATAGCAAG	[A/G]	2R	11618314	rs5418917	S	0	0
AGAMP3_2R_11620002	CATCTTTAACCCGCTGCTTACGTATGATTTGGTGTACGCTTGCACCAGGGCAGGGCGTCG[A/T]GCAAATGCCACCATACGGGCGTTGCACCAATTTACCCGTTCCGTGATTCGTGAGCGCGTG	[A/T]	2R	11620002		IGD	0	0
db5374184	ACAACGTTCGTCAAAATGTGGTTCGTGTGCTATTGCTATTGCCTCTAATGTCTAATGCCT[A/G]TCCACCAGCTTGACGAACGCCCCGTGGTACGGTTTGAGCGTAAGGTTAGCCTTCAC	[T/C]	2R	11620835	rs5374184	IGD	0	1
AGAMP3_2R_11625305	TTGAGAAAATGCTCTAAAGGTGTGTTGGGAAAGCTAACCCGCGCGCTCGTGTGTGTGCCT[A/G]TGTGTACCTTAAGTGGGCTGGGAATGAGCGCTCGGGAAGAAAATGCAACACTTTTATTAG	[A/G]	2R	11625305		IG	0	0
AGAMP3_2R_11754525	AAGTGCACAGAaggggaaggggagcgaggggggtggggggAGGTTCAATCATGCACATCA[A/C]ACTGGTGTGTTTGTTGTAAACATGCGCATATGCAACAGGAAGAGATCACACCATTTGTCT	[A/C]	2R	11754525		I	1	1
AGAMP3_2R_12274561	GTGGCTGTGTTTCCTGCGAAACACACCAGTCAAACGAGGGTGTCTGGACACGATGTTCCA[A/G]CACACATACTTACCAACACACACACATATGTGAGTCCACGCCTCCGAGAGGCTGGATTAT	[A/G]	2R	12274561	rs5242265	IGU	1	0
AGAMP3_2R_12777152	ATGTTTTTGAACGTAATTTGCaaaagaaaaaagaaaaaGTTTTGTTAACAACTTTTCACC[T/C]CCCTCGGATAGGTTTGAGGACGATGCGGACGATCTGTCGATATTGAACGATTCGCGCCGC	[A/G]	2R	12777152			1	0
AGAMP3_2R_13265535	GGCGGCACCGGTGATGGTTACGAGCGCGATATATTTTTAGACCCGGGAGAAGCCTTACTA[A/C]AGTAGAATCTTCCTTTATAGAGCCTCCAACATTTACGAACACAAACACACACATACTGTG	[A/C]	2R	13265535		IG	1	1
AGAMP3_2R_13762737	TTGGCGAATGGTTTTGGCGCTGGAATGGTGAATTGGTTATTACACAATGAGTGGGGCAAA[A/G]CGAGCAAAAAGGAAAAGCTTCCCATTCCCCCTGACTGGTCCCGCGCTTAGGATTCTGGTG	[A/G]	2R	13762737		IG	1	1
AGAMP3_2R_14259496	ACCCACGTGGTAGTTGAACGAACGGGGCACACCAACTGCACCAACGTTTCGACACGCAAA[T/G]GGAGATGTTTGATGCTGTTTTGGACACACAGCAACATCCGATGGAAAATGGGCCCCGCTG	[T/G]	2R	14259496		IG	1	1
AGAMP3_2R_14765195	AGCATATCAGTGAATGGTAAAGAAGAATGGAAATGTAAATGATAATTGCATATCAATACC[A/C]AACACAGAAGGGAGCCCAAGCAACTAATCATCCACAATTCTTGCCAGCATCTCGGCTCAA	[T/G]	2R	14765195		IG	1	1
AGAMP3_2R_15191838	AGGACGATGATTCGATTATGATTATATTTTGGCGAGGCCTTTCCAGACGGTTTTTCCCAA[A/G]CCGTGTGCCGTTCTGTGTCGGTATGCGTTCTGTCCTGCTTACTGTTCGGGGAAATCGTTG	[A/G]	2R	15191838		IG	0	0
AGAMP3_2R_15198437	TTATCCTATTCATGCGCGGGTGCCGCTATGGGTGGGACGTCTTTTGTGCCGTCCCCATCT[C/G]AAGGAGTGAAGGTTTGCTGACTTCCGGACCGCAATTGATaaaaaaaaCGGGTAGTTTATT	[G/C]	2R	15198437		IGU	0	1
COE-16738-1-snp2	GCGYCACCGTYCCAGGTACATGCCACCAGTAACGCCGTCTACGTGGAAGGC[A/G]CCACGGTTGGTCGATCGGTTTGCGCCCGTCTGCCCGCAGAAGCTGCCCAAGCTGGAYGGY	[T/C]	2R	15199638		S	0	1
AGAMP3_2R_15200601	GCAATAATGAGGAGCACAGGGCGGGGCACATCTGTTTACCGCTGGCGGGGTTTTGAGGAT[C/G]CCCAAAATGTGTGTGTCGTTTGCAGATACTATTTCCCTGAATACAATGTTTCACGATGTG	[C/G]	2R	15200601		I	0	0
AGAMP3_2R_15200680	TTTGCAGATACTATTTCCCTGAATACAATGTTTCACGATGTGCAGCCAAAGCACGTGGTG[T/C]ATGGCAGCAAAAAGAAAGCGAATCATTCACATTGTGGCTTTCGTCGGAACGAGCCGAGGG	[T/C]	2R	15200680		I	0	1
AGAMP3_2R_15203191	GCGTACGATTTGGCCTTTTGTGTGTGTATGAGTGTTTGTAGCCAAACCAAAAGTTATGAG[C/G]CAATGGGCTAATTGTTACTTTATGGGATTTTAAAAGTGTTTTACGGTTACAGTAATGTTG	[C/G]	2R	15203191		I	0	1
AGAMP3_2R_15205075	CGATAATGATTATCCTGTGCTGTGATTTTTAATTTCCTACCTTTCATTTACCGGCCGCTC[T/C]CGGCGGCAAAACAGATTTTTGCCAGGATTTGCACCGTTTGTCGACGGAACCGTCATAACA	[A/G]	2R	15205075		I	0	1
AGAMP3_2R_15288640	AACACAAACCCGTAAAACCGTTATTAGTTTCGGATTTACCGACAAGTCTCTCCTCCCAAT[A/G]CACCATCACCAGCTTTGTATCACGTGTCGTTTGTCGTGTGGCGGGaaaaaaagaaagaaa	[A/G]	2R	15288640		IG	1	1
AGAMP3_2R_15762077	GCCAATTGTCTCGTGAAGTATGTCTTTGCAACaaaaaaaaaaaaaaCGCGGATTCCACAC[T/C]GTGCCAGTGATGGACAGTAGTAGTAACCGGCGAACGGCGAAACCCGAAACGAAACGGGCA	[T/C]	2R	15762077	rs5585410	I	1	1
AGAMP3_2R_16244502	CATATACACATATCGCCATATACACATATCGTTCCGCGTTCCGGAATCGCGTGATGGAAC[A/G]AAATTTTGACAATCATAAAAGCGTAATAATATGCCAAGCATAAGgtgtgtgtgtgtgtgt	[A/G]	2R	16244502			1	0
AGAMP3_2R_16392890	GTTCCGCGAGTACAGCGAACTGTTCGAAACGTTCCTCGTGATGGAAAACGTGACACCGCG[A/G]GGTTTCCGTACTGGGCCGCGGCTAGATCTGGACGAGGCACATCTGACGCTGATGGTGGAG	[T/C]	2R	16392890		S	0	1
AGAMP3_2R_16394242	TCGGGACGTACGCCGCCGCTACGAACGGATTCAATAATACCAACCTTTGTAACGCAAAGA[A/G]TATTTTAGCaaattaataataaataaataaatattatataaaaaaaCGTATAGTATTAGT	[A/G]	2R	16394242			0	0
CYP325H1-snp5	CCTGGTGTACTACGTTAACTTTCGCCGTACGCGCAAGCGSCTGTACGAGCTGGCCGAACG[C/G]ATACCGGGCCCGTTCGACTATCCGCTCATCGGCAGCATGCTGCTCACGATCGGCAAATCT	[C/G]	2R	16395908		S	0	1
CYP325H1-snp4	CCCGAGCCAGGCACGCATCGGCGACGGAAGGTGAKGCATCAGCTCCATCAGGTGCGTTAC[T/C]AGCTCGAGCGGAGATTTGCCGATCGTGAGCAGCATGCTGCCGATGAGCGGATAGTCGAAC	[A/G]	2R	16395980		S	0	1
CYP325H1-snp1	GGTGTATTCCTCCAGCACTTCCCGCTT[T/C]TCGACGCTCAGGTCCGCCCCGAGCGTGGTGGACGAGATGGTGACYAGYGTGTAGCGGSCC	[A/G]	2R	16396386			0	0
AGAMP3_2R_16400306	TGCCAGCTGCTGCTCCCGCTCCTTCATAAACTCGGCACAAATTTTCAGATCCTTCTCGCG[A/G]TGCTTGAACAGTATCGTCATCTCCTCGAACTGCACCTTCAGGTTCACGATCTTGTCCTTG	[A/G]	2R	16400306		S	0	1
CYP325H1-D-snp1	CTTTTGGTTTTGGACCAATAT[T/C]TAAACAAAACGAGTAGCGTTAAACATGRGATTWTCYTAAATTATGT	[A/G]	2R	16402364		IGU	0	0
AGAMP3_2R_16462230	TGAGCGTACGCCGAGAGAAGGAGAAACATCAACACCACACAACGATTTAGCTATTAACCA[A/G]CGTGCGACGTACGTTTTTTGTTTGTTTCGCAATCTCCAATCAATTTGTTGTTGATGGTAG	[T/C]	2R	16462230		IG	1	1
AGAMP3_2R_16954403	CCCTCCGACAAGCTTCCCGAGGCGAACCAATAGAAGAAGCGGAGCCGCATCGCTTTGTGT[A/C]TTTTTGAATGGACTATTGTCTTCCCATTATCTGTTCCCAGATAGGGGAGGAAGATGCGTC	[A/C]	2R	16954403		I	1	1
AGAMP3_2R_17364300	TTCATAACCCCATTAATGATCGTCAATTAACCCATGTCAAAAATCAATTAATATTGCCCA[C/G]TGCGAAAGCTACTAGGTAAGCGACGTGAAAGTGTCTGGTACGCGTCGGATACACTTTTTA	[C/G]	2R	17364300		IG	1	1
AGAMP3_2R_17473719	AACGCTAAACGGGCTCGGCAAAGGTGTTCGCGGTCCCATCAGCGCGTCAGCAAGCCAAAG[A/T]AATGTGATATAGCATCAAGTGGTATTTACGTAACATCGATGCTCTTACGCATATACGCCC	[T/A]	2R	17473719		I	0	1
AGAMP3_2R_17476710	GGCCATTACGCATGACAGCAAGTGGAAGGTGGGCAACCACGAAGACGGCTACCTGATCGG[A/G]ATCAACAATCTGATCGACATCTTCAGCGAAGTGCACGATCGGCAAACACTGCAGTGCCTG	[A/G]	2R	17476710		S	0	1
AGAMP3_2R_17477251	GTGAGAATCCTTTGTTAATTTATAAAATACTACGATCAAACACTCTGAACATTAGGATAG[T/C]AATGGTAGCGTAAAGTACAGTAGACGAACATACAGTTTAATATATTCAACTCTATTACGA	[A/G]	2R	17477251		3UTR	0	1
AGAMP3_2R_17478820	CCTCTATAGTAGAAACGCCTTTTTTCGTTTTGAGTTTCATTTTCATCAGCCATTTCATAA[C/G]GCTTTGTCACCGCTTTGTGCGATCACAAGCCGTTCGTTTCTGGTTATAGCGATATAGGAT	[G/C]	2R	17478820			0	0
cyp325F2-snp2	TTTGTCTGGACACACGCTCATCACCTCCTGGTACACCATTTCCTGCACCTCGGGATGCAT[T/C]GCCAGCATTAGCAGYAGGTTCGACATGGTGGTGGCAGTCGTATCGTGMCCAGCTACRATC	[T/C]	2R	17479632		S	0	1
CYP325F2-D-snp1	ACTGGKGGTGTAGCATCCAAACCCGATCCAATAACAACGCATGAGTGGGCAAATATCTAG[A/G]CCCATCTGTGAGAAATTGCTCCATCACTGAACCCGCGGGGACAACTTCAACAACACTCAG	[T/C]	2R	17483877		IGU	0	1
db5601179	ACACAAAACGGTTGACCGAATCTTGCAAACCACACCGCGCTTACCACAAACCATATCCAG[C/T]GTGCACTTGGCAATGTACTCGTACACATTAAACAGTGCGCCCCGTTTCACGTACCC	[A/G]	2R	17484608	rs5601179	S	0	1
AGAMP3_2R_17486964	AATTGTAATGTGTTTGAAGTGtttttttttttCTAATTGGAAAAAAGGTTTACTTACGCT[A/T]AATAGGGCAATAAATTACAGCAAATAATTCCACCGGTCAATACTAATTAGAGGTCAATTT	[T/A]	2R	17486964		IGU	0	0
CYP325G1-D-snp1	TGTTTAATTGTTTGTGGACGTCCGATTGAAAGTTCTGTTTTGTGCTTTAATTGTAATTGCC[T/C]TGCGGGTGTGTGAGTGAGGAGTGAAAAGTGCATTTCAACGCGGAAATCTAGACTAATTTGAAACAGTTTTCTGAATACAGACAGGCGTGCTGCTCCCGA	[A/G]	2R	17487479		IGD	0	1
CYP325F1-snp4	ATACCATWCCGGCGGGCKGCTGTGTAGCGCTCGGCATCTATCAGATACATCGAGACCCGA[T/C]GATCTGGGGACCCGAGCCGGGAAAGTTCAATCCCGATCACTTYCTGCCGGAARGGGTAGC	[A/G]	2R	17489259		NS	0	1
db5722989	GTAGTGCGACGTCAAAAACTGTAGCACAATATTTAAAAAGCGTATAATTTTTCGAATACC[A/T]CCCAGACAAACATACCATACCGGCGGGCTGCTGTGTAGCGCTCGGTATCTATCAGATACA	[T/A]	2R	17489331	rs5722989		0	0
CYP325F1-snp3	TGTGCTACAGTTTTTGACGTCRCACTACTACCTACCATCCAGCTTAACATCCGCAGCGCA[T/C]TTCCTTCCAATGACTGGWGCTACAGGGAACAGACGCATCGTTTCTTTGCACACCATYTCC	[T/C]	2R	17489424			0	0
CYP325F1-snp2	CAGACGCATCGTTTCTTTGCACACCATYTCCGTGTACGCGAGATTGTTGGCATCTTCCAT[T/C]GTCACAGGTTTYGATTTGTCTGGACACACGCTCATCACCTCCTGGTACACCATTTCCTGC	[T/C]	2R	17489514			0	0
CYP325E1-U-snp2	MAATACACGTAGCCAGAAACAGCGTGTCCACGAGGGAGCGGTAAAAGCGGTGCGTTCATC[A/G]CGCCGTCAGCCCTCACAGACCGCGGGAAACCGGTTTTTTTTTC	[T/C]	2R	17561982			0	0
AGAMP3_2R_17566207	GCGTACGCCTCTTCTTTATCGTTTGCGGTACACGCACTAGCAGTTTTCCGCCTGCCTCAC[A/T]CCGCACCGATTTGTACAATTGCATGAAACGCAGTAAGGACCGCTTGTACCGCGTGCCGGC	[T/A]	2R	17566207			0	0
AGAMP3_2R_17566822	GATCCCGGTCATCTGTCCGACGCATCCGGATCTGATACAGAAAATTATGACCGAGCAGGC[C/G]AGCATGGACAAACCGTTCGTGTACGATTTTATGCGCGTGGACCACGGATTGCTAACGGCG	[C/G]	2R	17566822		S	0	1
AGAMP3_2R_17569692	GCTACAACAGCTTATCTCACCCAACTAGTTTGTATAGATTTGTGAAAGGAAATGAAGGCT[A/T]GCTGCATTTGGCTATTGATTTTATTGCTACACCAACTGCGTTAACCGTAATTCACCGTCG	[A/T]	2R	17569692		I	0	0
CYP325E1-START-snp2	TGCGCTGCACCGTCAGAAAGAGTTCTGGGGCCCGAACGCGGACAAGTTCGATCCGGACCA[T/C]TTCCTGCCGGAACGCGTCAAGGCAAGGCACCCGTACGCCTACCTGCCGT	[A/G]	2R	17571728		S	0	1
AGAMP3_2R_17572165	CGTTTTGACGCTTCTCGAACAGGCGATACCGCGGCGAAACAATCAACCTAGACGAGCATA[A/G]TCATGTTATGTAGTGAGTGGGTGTTCGTATAACTTCCCCCTAGCAGTACATGCGCTTTGA	[A/G]	2R	17572165		3UTR	0	0
CYP325E1-D-snp1	TGATCGAATYCATTTGGGTCTGGTTGTGWGAGTTGAAGCCGCATTCTGTTGCGTGTTGCT[T/C]ACACTTACACAAATGAAAAATGTAACAGAAAAAAAGCATTGAACAATAAACACATCGCAC	[T/C]	2R	17572330		IGU	0	0
CYP325C2-1-snp2	TRCGGTGGAAACCATTGTTGAGCTGTTGTGGATAAGGAATGCTTTGTAACATCGATTCTC[T/C]ACACTTACCGCYGCKATCATCGAGTAAATGTTGTGCKTAACTTCGATGTCGGTAAAGGGA	[T/C]	2R	17578138		I	0	0
Cyp325C2-snp1	CACCGGAATAAAGCTGTTCAGTATGCGCGTGTTGAAGGTCGGATTGAGCGCTTTCCGTTG[T/C]GTTTTCCACGGATGATCTACGAAGKAACGRAAAAYAHACACACSCATCACTTTTATCTTC	[A/G]	2R	17580468			0	0
Cyp325C2-snp3	CACCAAYRMTCYCACTGCCACTCMTCATCACGCTCTGTMCCTACAGTGTCCCGCAAAGAT[T/C]CCGTGCTCCAGCTTCACAAAGTCGTAGAAAAACGGTTTCTCYAGACAATCGGGATGGCTA	[A/G]	2R	17580594			0	0
CYP325C1-START-snp1	AATTGTTGATTGCGATACAATTGCCGGTCAAGGTGTGTATCAACACATAACAAGTGTTAG[T/C]GCTCAATCTCGTTCGATTTGGGCACCGGGTTATTCATTATTAGTTTTCACGATCGAATGT	[A/G]	2R	17581442		IGUD	0	1
AGAMP3_2R_17583710	TGATTGAGCATTCTGTGTTTACAGATTCGTTATCAAAATCGGAAGTACATCGGAGCAACA[T/G]ATTTCAATGTTTGAGTTGCGTGTACTTCCGATAATGAGATGCAGCTTCCTTGTGATGATT	[T/G]	2R	17583710		IGD	0	1
db5375118	TTGTACCAGACACCTTGTTGTCATGGTTGGATAATTTTTAAACGCTGCTTAGTAACCGTC[C/G]AGTGAATTGTGTAAAAGCACACCATCTCCATTATGCTAGCGCGTTCAAACACTTCAATAA	[G/C]	2R	17584254	rs5375118	IGD	0	0
CYP325C1-snp1	GTGGGCCGGYTTGTCACCAGTGAATCAAGTTTTGATRGAACGGTAGTGACTTCCGGAAAC[A/G]AATGCTGCATCGACATCATGCAATCAGGGGTGGTTGATAATATCATAGGARCGCGTTGCT	[T/C]	2R	17584652			0	0
CYP325C1-snp2	GTGACAARCCGGCCCACTTTACGGTTGAGCASAGCACCAGCCGCAATGGATCACCACAAA[C/G]CATTCTCCGTATTGCTAGTGCTGCTGCTACATGGAAGTGTAAGTTGTCAAGTCGTAATTC	[C/G]	2R	17584756			0	0
CYP325C1-snp4	CCATAATTCCTTCCAATTTTAGCTACAGRCATACGGTACYATATCTCCCAAGGTCATCGC[A/C]CTGCAGCAAGTGCTCTCCAGCGAGCTACAGACACTGGAACGTAACGCACTGCTTACGGGT	[T/G]	2R	17584901			0	0
CYP325C2-1-snp3	CTRGCCCCKTCCGGACCGWACATTGCACGYCAAACGATGAAGGACATTGAGATAGCTGGT[T/G]TACACAYACCGCGTGACAGTTTGATAGTGATGAGCATATTTTCAATGCACCGC	[T/G]	2R	17589909			0	0
db5469267	TTTACTCGCAACCCGTTTTCCTTTGTTTCCCTGTTTGCCGTCTCGACGTTTTGTGCGAGT[A/T]TTTTCAGATGGTTCGAGCTCATCGCGAAACGYATGGTCAGTATCCATCATTACATCGAGC	[T/A]	2R	17590602	rs5469267	I	0	1
cyp325A3-snp3	GTTCGATGTRCTTCATTACACYGCTCAGTGCRCGCTGGAGATGGTATTCGCTAGCTCCCT[T/C]AARAGCGACATTACGGACGATGCGCAGCTGCACGAGGCTTGCGAAGCTATCCAAAATATG	[T/C]	2R	17595189		S	0	1
cyp325A3-snp2	CTCGYTCCACTTTTACCTTCATCTTCTGTAGCTCATGGTACTTATGCGTTAACGTAAACA[A/G]CAGGTCACTGTAAAGCAGCACATTAAACATACGGCTRCTCATGATGGTGCACATATTTTG	[T/C]	2R	17595301		S	0	0
cyp325A3-snp1	TGGCTCACCGCTGCAATGATGTTGTTGAGATGGTTTTCAATCTCCTGGATTTCCAAGTCT[T/C]GACCACCTCGCTGCATGTGCAGCAACTGATCAAGAAAAACCATYGGCTTCCGGTAATGCT	[A/G]	2R	17595566			0	0
Cyp325A3-Down-snp2	GTTGYACRGTACAGAAATTGTTCATCTGCACTACCGCACAAACCATGGAACGCCCTGTAC[T/G]TTTTGAAATTCCRCAGTATTTTGTGTATACATGACATTTTGTAACAACAAATCCAAAAAC	[T/G]	2R	17597296			0	0
AGAMP3_2R_17599215	TACGGTAGCTTTTTCAAACTATCGCTCGGCCCCAAGACGTTCTTGTGTCTGTCCGATCCG[T/G]ATCTTATTCAACAAGCGCTCACATCGAGCGCCTGTCAGGATAAAGCGTTTTTCTACCGTT	[T/G]	2R	17599215		IGUD	0	0
AGAMP3_2R_17603267	CTCTATCTTCTCCGCAAATTTAAACATTTTCTGATGCTTCCGGTACAAAACTGCACCGAA[A/G]ATAACGACAAGCGTCAGCAGAAATAGCTGCATGATCACACTTTTCTTATGACGACACTCG	[A/G]	2R	17603267		S	0	1
AGAMP3_2R_17604899	CCGTCTGTTTAATGTGCTGCTTTACAGTGACCTGTTGTTTACGTTAACGCAAAGGTACCG[A/C]GAGATGCAGAAGGTGAGGGTTAACCTGGAACATGTAGTAAATCCGGTGAGTGTGGCTGTG	[T/G]	2R	17604899			0	0
AGAMP3_2R_17605206	GACTTGGAAATGCAGGAGATTGAAAACCATCTTTACACAATTATTGGAGCGGTAAGCTAT[A/T]GTTAATGTACATGCGAATATGGTAATCAATCTTTGTATTCATTTTCATCGTAAACATTTG	[A/T]	2R	17605206			0	0
db5567419	CGACATGACGCAGTAAATTGCATTGTTTGCTGCGTCTGAGTAGTTTTTCATCCGATGCAT[A/G]CTTTCTTTTCGAGCCAGCGGTAGAAGTGTGCCGGCGGAGGCAGTGCGTATATTGTTGGCG	[T/C]	2R	17607228	rs5567419	IGUD	0	1
AGAMP3_2R_17612756	ACATATCGGCTAATAATTTGTTGTGACTAAATATGTCCCAAAACCTTTTAGGGGAAAGGG[T/C]GCAGCTAGTGGGGCGGGTTCGCTGATCGCCCACCGCGGAAGGTACGAACGAGGGCTAATG	[A/G]	2R	17612756		IG	0	0
AGAMP3_2R_17971369	TCGCTTGCAGTAGTGCTCATTTCAAGGAATGCAAATGTGAACAGTTCTTCTCACACCAAA[T/C]GCGGCCAATATGTAAAATGAATGCACATTCGTAGCTTAAACTTTCGTACCTTAAACGTAA	[A/G]	2R	17971369		5UTR	1	1
AGAMP3_2R_18461718	TCCTACGGCAAAAAGCAATTACAGCGGGCTTGAAACTGTGAGGAACACGAAGAGGTGCTG[A/C]ACAAAATTAGTGCTTCACCCATACAAacacacacacacacaTACACCCACGCAGGCACTG	[A/C]	2R	18461718		I	1	1
AGAMP3_2R_18511091	GATTATGAAAGTTACTATCCCTAGACAGATTTTATTGCACGTTTGTTATGTTAAGTAATG[T/G]TAGAAAGGAAGGCTTTTCCCACTGCCGCACCAGAACGGCATCCAGCGTGGGGCCGCGTTT	[A/C]	2R	18511091		IG	0	1
AGAMP3_2R_18516244	AAAATGTACAGCAAACATCAATGAATGTGTATGCACTAACCTAGCACACGATGCAAGACG[A/G]AGCGCTTGTAGAATGTTGTTTATTGCATTTCGGCATCCTGTTTAATTAAGCAAGAGCGTT	[A/G]	2R	18516244		IGU	0	1
AGAMP3_2R_18521559	ATTCGTTTCGTTTCATTaaaaaagaaaaagaaaagaaaCGACAGTAACGAGAGCTTTACC[A/T]TTTTATTGTCGTCGTTCGTGGTGTGGGGTGGGAGGGAGCCCGCGTATACTAATTGCAGAC	[A/T]	2R	18521559		IGD	0	1
AGAMP3_2R_18964323	CCAGCCAACATGATGCATGATGCGTCCGGTGCATCAGAAATTCTGTAGCATTTTACGGCA[T/C]CGTTTACGTTGTTTGCACCGTAATGTGAGCTATGGTTAAATTGATTGCATTCAATAAGCT	[A/G]	2R	18964323		IG	1	1
AGAMP3_2R_19469061	TAATCGGCCCGTGTTTTAAATGCAACCAAATGCGCAAGCGTTTCTAGTTTTAGCCTCGCA[T/C]CGCAGTGTCTTTGTTTGCGTGTTCCGGGAAGATGGTGCGAATCTGTAAAACCCGTGCATA	[A/G]	2R	19469061		IG	1	0
AGAMP3_2R_19959919	GAGAGCGGCATAGCTCATTGATAACTTCTCCCGAGAAGAACTaaaaaaaaaCCTGGACGT[T/G]TCTTTCTTCCCGAACCGCTGGCAGAGTGTTTGAGTGAGTGAGTGTGACCACCCAACCACC	[A/C]	2R	19959919			1	0
AGAMP3_2R_20463553	ATTTTTCCAACTGATGTTCAAGCGTTTACTCCCTACTGGTTGCTGAATACCAGTCGGCAT[T/C]CTTGGTTAACCCTTTTAAAAACCAGATGAAAAAGGAAAGTAAGCTTATTATGTTAGCAAA	[T/C]	2R	20463553			1	0
AGAMP3_2R_20891547	GGGTTTCGTGCGCGACGTAGTTAGCTCGTTCAAGCGCGAATCGCGCGCCATCATCCTCAC[T/C]AAGAACGGTGCACTGGAGGGGCGGCTGCAGCAGGTAAAGGGCGGCGGGTCCGGTTCGTTC	[T/C]	2R	20891547		S	0	1
AGAMP3_2R_20894463	TAACACTTTGCAGTGCGGTTGCACTCAACGCGGCCAGGTCAACGGGGTCAGATGGGAATG[A/G]GTTTTCGGTGTGGCCACATTTTAGACAATTTATACGAACGTTTTTAATTTGCGCTTGCGC	[A/G]	2R	20894463			0	0
AGAMP3_2R_20897059	ACGGTACGGAGGTGGTCTAACAGTCTGAGTATGAGTGCGTTCAAAGTGCAGCAAATATGG[A/G]GGAGCAGTTTGTTTGGTTTTGTTTCGCATTTCCTTATGTAATGTTTTTACAGCCCCACCG	[A/G]	2R	20897059		IGD	0	1
AGAMP3_2R_20959445	CTTTCTTCGCGTAAATGTGTTGCCACCGGCTTTCACCGGTTTACTACTAAAGGTAGCAAA[T/C]CCGGCCAGCATGAGATCTTGGCCGTAAAAAGAGAAGGAAGGATTCGTTTGGAAAGGGTGT	[A/G]	2R	20959445			1	0
AGAMP3_2R_21044468	ACTGACCGATCGTGTGCACCTTGGCCAGCTCCGGGTAGTCCTTCTGCAGGTGCGCCAACA[A/G]GTCGAGCAGCTCGTTGTTGCTCCGGTAATGGGGCTGCTGGAGGAAGCTTTCATCCAGATC	[T/C]	2R	21044468		S	0	1
cyp4K2-snp2	RACGGGTGGRAACAGCCGTAGCGACTCCTTGATGACCAGCTCCATGTAGTGGAGATTGTT[A/G]AGCGCGCTTAAAGTGTGCAGACAAATCGCMCTATTTGTAGCCGAWACGATTGRRAAGCGT	[T/C]	2R	21049010		S	0	1
AGAMP3_2R_21049510	GAGTTTAGAATGTGTTTGGTAGATTGTTTTATTGtttttttttGTTGGGTGTAGTGTGTG[T/C]TAAAATTAGTAGAATGTTCCATTTGAGGTTGTTCGAAGTCTTGTGAGAGACAGGACTCCT	[T/C]	2R	21049510			0	0
AGAMP3_2R_21049677	AGCTAACAAGAATCAATGATTTTCTGTAACTGTACTCAAACTTTGTAGACAATCATACGC[A/C]TATTAAGATTGTCAATGAAACTATCACAATAACCTGCCACCGGTGAATACGTTAATAAAA	[A/C]	2R	21049677			0	0
AGAMP3_2R_21050218	CGTCGAACCCTTCTCGAGCCGAACGCCACCCTGCGTAGTGTCGTGATCGATGTGCCGCGA[A/G]TAGTACGGCACCGGGGGGAACATTCGCAGCGACTCCTTGATCACCTGCTCCAGGTACTTC	[T/C]	2R	21050218			0	0
CYP4AR1-snp2	TMYACTRSCTTYCTTAAGTGAYATCACRCAACACACATGTCTTCCACAGGGCCACGACAC[T/C]ACRTCCAGYGCYATCACCTTCATCCTGTACGCGTGTGCCAAGCATCCCGASGTGCAGCAG	[T/C]	2R	21050410	rs5578064	S	0	1
AGAMP3_2R_21051582	GCGTGTTGCCCAAGAGAAAGTTTACCGGTGGGCCGGGCAAGTGGCCAACGGTACGGTACA[A/C]CTTGTAGCGGAAAGCGACAAAGCGCAGCACGAGAACGCACAACGCAATTAACAACGCGTA	[A/C]	2R	21051582		NS	0	0
AGAMP3_2R_21054809	GGCGCTGCTGCTGTCGATCGCAATCTGGTGGACGGTGGCAAACTTTGGCAGTGCGCTGCG[A/G]TACGCCGGCAAACTGGGCGGCCCGGTAGCGTACCCGCTGGTGGGCAATGGGTTTCTGTTT	[T/C]	2R	21054809		S	0	1
AGAMP3_2R_21054999	aaaaaacgtgaatcaaaacaaaccaaaacaaaTTACAGAATTCCTGCAACTGCTCGGCCG[T/C]CTGATCGCACAGTACGGCAAATGTTTGCGTGTTTGGCTCGGTACGCAGCTGATCGTGCTC	[A/G]	2R	21054999		S	0	1
CYP4D15-snp1	CCAGGARCTGRAYGAACGTGGTGCYGGTCATGATGAYGTGCCGGAGGAGGATGTGCTTGG[T/C]CGTAAGAAGCGTATGGCCTTTCTGGATATGTTGCTCCAGTCGACGGTCGATGGYCGTCCG	[T/C]	2R	21056463		I	0	0
CYP4D15-snp2	CGATACGACCACGTCCGCTATTAGCTTYATGCTGCACAGTTTGGCCCAAAACCCGGACGT[A/C]CAGGAGAAAGCGTTCAACGAGGTGCGCAATATCGTTGGCGATGATCGCAAGCAGCCGGTT	[A/C]	2R	21056637			0	0
CYP4D17-3-4-snp1	TCGGATGAAGTCGTACTCGGTCGATTTGTCGATRTACTTCGGGCTGCTTAGCAGTACCTG[A/G]AAGGAGGGTTCAATTGGAGCGTGCGTCACAAAACGGTACCTTTGTGGGGGGCTTTTAGCT	[T/C]	2R	21059303		I	0	0
CYP4D17-3-4-snp2	CCACCGGAAGGTGATCACGCCGACGTTTCACTTCAAAATACTGGAACAGTTTGTGGAGAT[A/T]TTCGATCGGCAGAGCAGCACGTTCATCAAGGTGCTGGAACCGTTTGCCGCGTCGGGYAAA	[A/T]	2R	21059474			0	0
CYP4D17-D-2-snp1	TGGWTTAGAAGGATRCGAATTGATTGTAAGAAGCCAAAGAGTCAAATAAGGACAGCAATG[A/T]ARGAAAAAATCCGAGGGTTCGTTGCTTGCCGTCCCGTTAAAGGCTTAATAAAGAATCACC	[T/A]	2R	21061272			0	0
AGAMP3_2R_21063198	GATGCTGAACGACATGCACTATCTGGATCTGGTGATCAAGGAGACGCTTCGGCTGTACCC[A/G]TCGGTGCCAATGTTTGGGCGTAAAATGATGGAAGATGCTGAAATAAGTGAGTATTTGCTG	[A/G]	2R	21063198			0	0
Cyp4D16-snp1	TGCAATCGTTWAAATTMTAATGTTAAAAAAACAACATYCCACAGATGGAAAAGTGTTTCC[T/C]GCTGGGTCGAATACGATCATACTGCCGTTCTTYCTTGGYCGCAATCCCGAGTTCTTCCCW	[A/G]	2R	21063324		S	0	1
CYP4D16-D-snp3	TTGGTAMACTGACCCTCAGCTGAAGYACGGTTGTACAAGTTGTATCTTATCCCACTGAAT[A/G]TGCTCGTTATCAAGTAGTACAGAATATGAACGATTAGATAGAGAATATATACA	[A/G]	2R	21064416		IGUD	0	1
CYP4D16-D-snp2	CAGCACTGGAAYCGGCTTCGGTCCCGCAATGGTGACCGATTTCTTCTGCGACCAGTCATG[A/G]AATAKATACCGYAACAGGACTAGCACTACAAAGGATAAYACRAACGGTAKAAACATTTCG	[A/G]	2R	21064597	rs5716114	IGUD	0	1
CYP4D22-snp3	WGYATTATATACTTCCAGCTCATCCCAAAACRCACTCAACGACTTTGTCTTACCCAACTC[A/G]ACRTTCTCGGTGAATCGACGGGCGATGATCGGTACCGGCGGATACAGACGAAGCGATTCC	[A/G]	2R	21067035		S	0	1
CYP4D22-snp2	AACRTASGCGTACGGRCTCGACTGCTCCATCGTTCGGTCGGGCGCAAACCGTTCAGGATC[A/G]AACCGTTCCGGGTCGGGAAACAAGGTAGGATCGCGGTGCATGTGCATGATGCCRATRTTA	[T/C]	2R	21067212			0	0
CYP4D22-snp1	GGGTGGAAATATGAACMAAAATAATYAAYTRTCACCTGTTACATAGTACGATACTCCCAA[T/C]AYGGCACTCACCGATACAATTGCGTGGTCCAGCACTGAACGGAACRTASGCGTACGGRCT	[T/C]	2R	21067315		I	0	1
CYP4D22-D-snp2	CAATTGGAAGAATGAATTCCAACCTGAGTCAAG[T/C]CTAGCAATAAATTGCAGCTGTTTTCAGCAATGCGAACGTACGGTACAGCTGTGTTCAAAA	[T/C]	2R	21071671			0	0
CYP314A1UP-2-snp1	SGGTTTGCGCAACTKCGACGCCAACGTTGCCAAAGAGGAGTGGG[A/T]TAGGGGATAATTGATTTAATTAGCGCACTTCATTGAACGGAATCAGTAGTCTTCTCCCAC	[T/A]	2R	21221887		I	0	1
AGAMP3_2R_21223830	GGAGCAGCAGCGGGAAAAGGAGGGCATCTACGAGAACATACGCAGCCTGTCGCGCGAGCT[T/G]GCCCTCTGCGAGCTGGTCATTAACTCGTACATTCCGAAGGAGTATCAGGTACGTCTtgtg	[T/G]	2R	21223830		S	0	1
db5609924	TATAAAATACCTCAAATAATAACTTGCACCCACCTCCAACGGGTTTGCCCGCACGGTCCG[C/G]TGTGAGCTCTCGCTCCTGTGTTGTGGTGTGGTTTTTGGTTAGCCGGGCGCACCACGGTCA	[G/C]	2R	21224637	rs5609924	IGD	0	0
AGAMP3_2R_21225592	GTTTTGAAGCAATACCGCTCACCCATAATCAAACTTACTACTCAATGAGACAGTGTTTTT[T/C]CCGCTTTAAGAAAGTTTAAGGCAACAAAACATGACTTGGCATAAGCACTAAACGCGAGGA	[A/G]	2R	21225592		IGD	0	0
CYP314A1-2-snp1	GTACCGCATCTCGCCCACRACGCCCTGCTTGGCRCGCATCCTCGAGGAAGACTTCCAGCT[A/G]TCCGGGTACCATCTGCAGGCGGGAGTAAGTATCAGTTAATCTGCTGGCTTGGGAGCCGCA	[T/C]	2R	21227092		S	0	1
CYP314A1-2-snp2	YGCCAAGCAGGGCGTYGTGGGCGAGATGCGGTACGACTCCTGGATGCAGGCCTTGGTGAA[T/C]CGGGCGYTCACCAGATCCTCGTTCGTGATGTGCTGCACACAGTGGGCGAACTCWTGCGCA	[T/C]	2R	21227179		S	0	1
AGAMP3_2R_21232959	ATTGAGAGCCTCACCGATCGCCCACCAGCAGTAGCGCAGTACCGGACGTCTCAACAAATG[T/C]CAAGCCGCACGGTAAACAATCATAGTTTATGGGCCCGTTGGAAGCTAGAAAAAGAAAGTT	[A/G]	2R	21232959		IGU	0	1
AGAMP3_2R_21456447	CTTAATGGTATGCCGCTTTATCTATCGGGTGGGCAGAAGCATTAATCTTTGATGTTGATG[T/C]GGCTGCTGCATAAACGACGACCAGCTTTCGATGGGGCACAAGGAGCGGGTGGGGCGGTCG	[A/G]	2R	21456447		IG	1	0
AGAMP3_2R_21957746	GCGATCTAGTTGACCGTGATGGCGTGGCGGTGGTTGCCATGGATATTACGGTGTTGGAAG[T/G]GTTGGACTGGATTGACTGGTAGGAAGGAAACAGTGTGGTATGTGTGTCACCTTCGAGCAC	[A/C]	2R	21957746		IG	1	1
AGAMP3_2R_22472366	CGCACTCTGTGGTTGAAGTGACGACTTCAGCACTGGCTTCCGGTTTAATATGGAGGGGGA[A/T]GGAGGAAAGATTGAACGAATTCCGACGCTTTGGAGACCACTTGGGGGCAACACGATCACC	[A/T]	2R	22472366		IG	1	1
AGAMP3_2R_22778355	AATTTGCAAACACTCAAACGaaaacaaaaaaaaaaaGGGGAACCACCAACAAAACAACCC[T/G]ATAAGGATAAGGGTAGGATTGTAAAAATTGTACGCACTACGCATTAGCCTCATCCCCCTG	[T/G]	2R	22778355		IG	0	1
CYP325K1-U-snp2	CGCGCCTCSCAAGCCATCCTGCAGATACTGCACCCGCACATCAAGACCTGGGGCTCGCTG[T/C]TGCGACTGTACGGCAACCGGTCGGTGAAGTCGTACAAGGAGAAAAAGCAGGAGGAGCAGG	[T/C]	2R	22781014		S	0	1
CYP325K1-U-snp1	CAGRTCGGACGATTGCTGCTGKGAGCCACCGCTGCCACTGCCGCCAGCACCGGCGCCACC[A/G]CCGTTCGAGGCACCCTTCGCATCCTTGCCCGTAATTTTGTC	[A/G]	2R	22781381			0	0
db5360865	CAATAAAATCGAAAATTAGTGCAAAACTCCGTTGGCACAGACGGTTGATGAGGCCCGGGC[A/T]ACGGGGTGCGTACGTGAAACATAATTTATGCTATTATTTTTGCGATGTGCGGTGTGTGTG	[T/A]	2R	22785235	rs5360865	I	0	1
db5346796	ACCGTTCGGCAGCCGGACCACCTTGTACAGGTCCGGCTTGGCCTGGCAGTCCGGATGGGT[C/G]AGCACCTTCTGCACCAGCTCCGGATGGGTGAKGCCGATCGCGAGCTGCGACCCGAACCGC	[G/C]	2R	22785859	rs5346796	S	0	1
AGAMP3_2R_22788621	GGTTGCCTGCAGCGCGAACAGCAGCAGCAGCACCGCCGGCAGCAACTTTTCGCACCCGGC[A/C]AAAGCGCACCGTTGCTTCATTTTCGGTGTGCGTGAGTTTCTGTGTTGGCTGGAAAACCCA	[A/C]	2R	22788621			0	0
AGAMP3_2R_22953545	CGCGGTTCAGGGTTAATTGGTTCACGGATTTGCTTCTCCCGCGGAGCATCGGTCGCCAAC[A/C]CTGTAATCCCTAGCAGAGTGAGAAACAAACGCAGCCCAGTAAACAACAAACTCACCCAGA	[A/C]	2R	22953545		IG	1	1
AGAMP3_2R_23457053	CCGTTCTTTTCTCAGCTGGAAGATTGGTCCGTTTTTTGGGGGCAAAAGTTTAACAGGACC[T/C]AGAGCATGTTTCGGTTTTACTCTAATGCAAACAAAAGACTTTTCCCACCGGCACGCTCAC	[T/C]	2R	23457053		IG	1	1
AGAMP3_2R_23965546	CGCTTCCGTACAGGGGCTCTAATATTGAACCAATAAATTCATCACCCCAAGAAGGCTTTC[C/G]CTATCAATTATCGACCAATGATTATCAATTTCATGCACTATTACACGCTTCAGTTTAACA	[G/C]	2R	23965546		IG	1	1
AGAMP3_2R_24464241	TCCTTAGGCGAGGGGGCAGATGGGTTTAAAACTGATTTGAAATACCTCTGCATGAAAGTT[T/G]TTCAACCGAAAGAGAAGGAGATGAGGGTTGGAAAAGGACGGTGAAGGGGTGCATTCGAAT	[A/C]	2R	24464241		IG	1	1
AGAMP3_2R_24762888	cgaaacaaaaacaaaaaaaaatacagcgcacacactacaaaaacaaacaaataaaTTTCC[A/G]CTCGCCCGACAACGATAACAAATGGTAATTTATCACGAATTGTTTTCCAATGGGTCCCTA	[T/C]	2R	24762888		IG	1	0
AGAMP3_2R_24765154	CTTTTATGTTAACTCCAACACGGATAACAACATACACATAGTGTTGCTTTTTTTCGCACC[A/C]GCCCCGACACTTTTAGCTCGCTCACTTGCTGTATGAATGGTGACCCGAGCTAAGTCGCTT	[T/G]	2R	24765154			1	0
AGAMP3_2R_24806646	TACATACTCATACCGAAGCACCGCCGAAGCACCGCCGAATGGTGACAATCTACAAAATAA[A/T]ATCGCTCGAAGCGCAACCATTCGCATGACAGTCCTCCCATTTGGTTGAAAACCTTTTGTA	[T/A]	2R	24806646		IG	1	1
AGAMP3_2R_24839508	CAATGGAATGTCCGCGCTGTGTACCTGCAGCCCTGCTAGATGAGTGTACACTTCCGTCTT[T/C]GCTGCAAGGCCTGGCCTGCTACGAGCTACGGCCAAGCGCTTGGATTCTGTTTGACGGCGG	[A/G]	2R	24839508		IG	1	1
AGAMP3_2R_24859024	GCTACCTTCTCGGTGGTAAATCCATGGATAGAATGCTGTTTAAAGACTTGTGCAATACAC[C/G]GTTTGCACTTTTCGTTGCAGATCGTACGCTCAGCTATGTCATACATCACGTTGATGAAGT	[C/G]	2R	24859024			1	0
AGAMP3_2R_24862375	CGCCGTGAAACCCGAAGCGATGCATATTGATTGGTAGAGTAGAGACAGCGTTCGGTAGGA[T/G]GTTTGAAACACGACACTCCTGACGCCGCCATTGCTGAAATGTAATCGGATGCTTCAGACA	[T/G]	2R	24862375		IG	1	1
AGAMP3_2R_24865797	CGGCTCGGCCTTCCCGCCAGCTAGCAAACGTTATTGAAATTCCGCAACGCTACACCGAGC[A/T]CCGGAAAAACAACTACTCCTTCGATGCAGGCAGTCGGGATGGTGAAGCTGCATGTACCGC	[A/T]	2R	24865797		IG	1	0
AGAMP3_2R_24878319	ACCATCTATTAGAAATGGCTGATACGTCCTGAACTTGTAGTGCAATCGGAATTGAAGTAA[T/C]ACGTAGTTGTACAACCCAGACACTTCTAGCGTTACGCGCAGAAGCGTTGGTTGATTGCGG	[T/C]	2R	24878319		IG	1	0
AGAMP3_2R_24902886	TAGCGAATAGTTACGTTTAGCATACTGGCCTGACCTCTCAAGCAGTGGGAAAGATAGAAG[A/G]AAGAGCGAAAGGTGAAACCGACCGAAGTGATTGACAGTAGGTGGCGGCTTTTGCAGTCTT	[T/C]	2R	24902886			1	0
AGAMP3_2R_24906096	AGCAGAGGCATCCGACCATGGGAGAGGGATGGTACTGTAGCCACCTTCTTGAAGTATCCC[T/G]CCATCAGACAATGTGGCAAACTTCTCCGCCTCAAGGTTTACGATCCCCAAACAGTGACAC	[A/C]	2R	24906096		IG	1	1
AGAMP3_2R_24938302	ATCCTATCACACCACTTACTAACACGCGCGTGCGACCCTTCGAATTGTCAACTACAACTG[C/G]GTACTAAACTGCTGCTGCTTCCTTCTCGcccctgctcccccctccccccTTTTCGCAGTG	[C/G]	2R	24938302		I	1	1
AGAMP3_2R_24945737	TGTTACACCCGGGTTTTGGCGGATCGCGTAACGCTCACTCGCTTGTGGCGTTCGAAGCGA[A/G]GGTAAAGAAGGACACCACCACGCCAACAAAAAATCGCATTCCATTCACTAGCCACCGACA	[A/G]	2R	24945737			1	0
AGAMP3_2R_24951815	CTTCTTCTTTTTCTCCACTTGCAACAGCATCCATGCGTTGATCTAGTGCCTGCGTCCAAA[A/G]GTTGACTTATTATGCCTGTGTCACAAGATAGATCTTATTCTAAACCTGCATAAATTTTAT	[A/G]	2R	24951815		I	1	1
AGAMP3_2R_24964738	CCGGATCGAGACTCTCTTCCGATTGCAATCTTCGATCGGATCGAATCGGTTCACAGTGTG[T/C]GCGGGGTGGGAATGTAAACATCGATCGTGAACTCACTACATCGTAGCGATTTGGCTGCTT	[A/G]	2R	24964738			1	0
AGAMP3_2R_24979798	AGCCCGTGGTTGGCTGTGGCtttttttggcactttttttttttttttGGGTGGAACCGGG[T/C]GGAGTGAACTACTGAAAAATCATAATCGTCGCTAATGAGGCTAACGGTGAACGAAGGCGA	[T/C]	2R	24979798		IG	1	0
AGAMP3_2R_24988365	AAgcggcggcggcggcggcggcggcTGCTGCTAGGTTTGGTTGTCACATACCGATCCAGT[T/C]CATTGCTTGGACGCTGTGTTGTCCGTTTGCTCTGCCTGTCCCTCGGCGCTGCACCTTTTG	[A/G]	2R	24988365		IG	1	1
AGAMP3_2R_24998745	AACAATGGAGCAAACATGTCCAATCGCTTGTCCCGCGTCTGGGGAAGATCGATGATCGAG[T/C]CAGCTAGACCGAGCCTACTAATGCCGTGCCGTGCTCTAGCCCGCACGCTTGCCCTGCACG	[T/C]	2R	24998745			1	0
AGAMP3_2R_25463173	CAGTGTATCGATGTGTTAACGTTACAAATCAACACCAATCAATCGATTGTAAAAATAATA[A/C]CAAAACCAGCCACAGCCACTCCAGCACACTCAATCAATCGTTCCGCCGTTGAAAGCTGTT	[T/G]	2R	25463173			1	0
AGAMP3_2R_25963889	ttttACATCCAAACCACACCATCTCCCCGTGTTGGAGTTTGTTTAGTACCAATTGCGATG[A/G]AAAACGAACACAACACAATCCAGCCTCTTATCGTCGTAAAGCAAAACCGGTGCACATATG	[T/C]	2R	25963889		IG	1	1
AGAMP3_2R_26474097	CGTTAACGGTCGTTGCTGCttttttttttGAGCGCTACTTTCCATTCTTATCGATTTCAC[A/G]TTTTGGTTTTGTCTGTGTGCGCGCACAGATACAAACACACTTTTTACAAGGACAAACACA	[T/C]	2R	26474097		IG	1	1
AGAMP3_2R_26970801	ACATATTTTGCTCTTTTCTCAGGCACGCTATCCGCGCTGCTCTTCTACGTTACGTAAACT[A/T]CTGTCGTCCACAAATCAAACCAACCGTTGATCGCTAGCATCCGATTGATTCGGGTTCGAC	[T/A]	2R	26970801			1	0
AGAMP3_2R_27496107	TCGTAAACATTGCCGTTTGCTGCCGTAGCGAACAGAGCGAGAAAAGCGAACGGAAAAGAC[A/T]TTTACGTTGTTATCGTATTGGTAAAACGTTTATGATGTAGCTGATATTGTTTGTGTGCAA	[T/A]	2R	27496107		IG	1	1
AGAMP3_2R_27961169	GTCGATCGCGCTCGAACATTGCGAAAGATAAACTTTATCTCCACTTAATAAGATCATGTT[T/C]TTGTTTCGGGTCGGTATGTCGACGCAACGACGATCGCAATTATATGGAGTTCTTATCTTT	[A/G]	2R	27961169		S	1	1
AGAMP3_2R_28000100	GGTCAAAATTTGTCCAGCCATGTTCAACGGTTGACAGACACGTACGGAAACATATGCGCT[A/T]CACTACACACACAATGATGCTGCACTCCCAGGGCGATGCCATCGTCAGGCGTAGTGCAGT	[A/T]	2R	28000100		IG	1	1
AGAMP3_2R_28021382	GTTGTCTGCGTAAGGGCTTGCTGTATTCGCTACTGTTTGGGACAGTGTTTTCTTCCTCTA[T/C]TTTCATAATCTGCTTCGGGGTGAATCGAACCTCCGATTAGTTGTTGTAGGATGAATAAAA	[A/G]	2R	28021382		I	1	1
AGAMP3_2R_28471506	ACATACACGCACACAGAAAATGCATTTAAACCCCACGCAAACATGGTACAACAATTTTCT[C/G]CTTGCCTTCTGCCTTTCAACGGGGGTTTTCTAAAACATGTTGGTTCTGCACTGCTTCACT	[G/C]	2R	28471506		I	0	1
AGAMP3_2R_28481279	TGCTGGCATCGTGATGTATCGCGTAGATCGGTATCATCAGCATCGTGTCGGGCTCGAGCG[A/T]TACGTTCGCTCCCTCCACCTTGTACGGTTGAGTGGTGACGCGTATCAGCTGCGGAACTGG	[A/T]	2R	28481279			0	0
CYP6AA1-snp1	WACCGGGGTTGGCCAYTACATACCATTGATGACCTGATCGAGGTACGTCATCTCCTTCAG[T/G]GCGTCGTACGTTATCTTGCCGTCGTGGAGTTGAAGCTTTTCCAGYACCTCCGCCCGCACT	[A/C]	2R	28481501			0	0
CYP6AA1-snp2	CGTTATCTTGCCGTCGTGGAGTTGAAGCTTTTCCAGYACCTCCGCCCGCACTCGCTCCTG[A/T]ATGTCGGGATTGTTGGCCAACTCGAACAGTGCRAACGAGAGCGTTGTCGAGGACGTTTCG	[T/A]	2R	28481569			0	0
CYP6AA1-snp3	AACGGAGGGACTGCAAAAGCTRACGCTCGACSAGGTGGCAGCGCAGGCGTTCGTGTTCTT[T/C]TTCGCCGGGTTCGAAACGTCCTCGACAACGCTCTCGTTYGCACTGTTCGAGTTGGCCAAC	[A/G]	2R	28481641			0	0
AGAMP3_2R_28482436	GTACGCTTCGTTCAGCACATCGTTGAAGTGAATCTCGGACCCGACGCCCTTCATGTTGCC[T/C]AGCGGGAAGGACGCTTCCAGCTGGGGTAGGTTCCGATTTGCCCAATGACGGTAGTGCTGC	[A/G]	2R	28482436		S	0	1
CYP6AA2-2-snp1	AAGCAYTGGCACAGYAACTTGATATCGATCGGGTCCCCGCAATCAATATACTTGTCGAAG[C/G]ARGCGAGCAACTCGTCTCCAATTTCACGTATCGTAATAAACATTGATTTGATCTTGCCGG	[G/C]	2R	28484396			0	0
GSTd5-snp1	TGGGCGTTCGCGCAGAATGACAGTGTGGTTRTTGTTGKTGGTGGTGGTAGCAACGCTACT[C/G]TAYTATTACGTATGGCGCCGCTACCGCTACTGGAGAGACAGAGGCATTG	[G/C]	2R	28484824		IG	0	1
COEAE60-snp3	GTCGTCCGTSTACCTGTACCAGTTTAAGTACGACGGTGACCTGAACTTGGTGAAACAGTT[T/C]GCTGGCATCCCGTTGCCGGGAGCAATACATGGMGACGAYCTTTGCTATCTRTTCGAAACG	[A/G]	2R	28485669	rs5660068	S	0	1
COEAE60-snp2	GATGCCAGCRAACTGTTTCACCAAGTTCAGGTCACCGTCGTACTTAAACTGGTACAGGTA[C/G]ACGGACGACCGGCTGGCGTGCCGTTTGGCCATTTCAAGCTGCGGATACGCGAACTGAAGA	[G/C]	2R	28485720			0	0
COEAE60-snp1	AGCGCCGGGCTTAACGGTTGACTCTGCCAGTAGTACTGCCGGAAGGCTTGGCTCACCGCG[T/C]TCGAYGCGGCACTGCCCGCCGGAATGTTCCACACGAACGGTACGAGCAGGTGCGGATTGT	[T/C]	2R	28485871			0	0
db5729146	CAAAAAATGGCCCATCGGTGGGGCGCTGATGTACCTGACGCCGTGTGTGATACCGACCGA[A/T]CCGCATCTGATTGAGTTTTTGCTCAACGAAGAGTTTGGGAAAAACAAGAAGAGTAGCATC	[A/T]	2R	28488814	rs5729146	NS	0	0
CYP6P3-S-463	ATTAAAGTTGTGGAATTCTAACACAAGTACACGYACACACACATCTGCGCGAATCTGCGA[A/G]ARAGATGATMAATGACGGAAAAGAAGAGTGCTGCAAATCTTCCATGACTGAGCAAATTTT	[A/G]	2R	28491193		IG	0	1
CYP6P3-S-349	TTTCGTGAAGAGTTGAAACAACAAAATACTCCAGATAAGATACTGCAATTGGSGACCATC[T/G]AGAGTGGCAAGCGAATGAAACAATCGACGCAAACGGCTTGCGCTTGACGCTTAATTAAAG	[A/C]	2R	28491307		IG	0	1
CYP6P3-S-166	AAGGTGGAAAAGTTGTAGTMGGCTATCAGTACAAACGTTTCGTTCGTTGGGTGCTGAAGC[A/T]CTCCCGGGGTTTATAATTTTGTGTTGCAATAAAAGCAAAACAAAGCATCGCTAACATAGA	[T/A]	2R	28491490		3UTR	0	1
Cyp6P3-snp1	GTTCACGTTCATCCCATTYGGCGAGGGACCACGCATCTGCATTGGGCTGCGGTTTGGCTT[A/G]ATGCAAACCAAGGTGGGATTGATTACGCTGCTGAGAAAGTTCCGCTTCTCGCCGTCCGCR	[A/G]	2R	28491680		S	0	1
Cyp6P3-snp3	HGGTACRCGGGTTAACGATTCCACCGGTGGGTACTTCCGAAGGGTTTCTGCAATAGAGAA[A/G]AAAACAGCAGCCAATAAKCACCCAGTCCGGCATACAAAATAGTATGAGGCTCAARCGATT	[A/G]	2R	28491962			0	0
AGAMP3_2R_28492268	AAAACACAAACGCCTGGGCCGCTAGCTCGTTCTGTGTCATGCCGACCTCTCCCTTGCCCA[A/C]ACTACCGTCATCACTATCGTCCAGCTTGCCCTTGTTCTTGATCTGCAGCATCAGGTTCAT	[A/C]	2R	28492268		NS	0	1
CYP6P3-M-315	GCTTCACGTTGTTCGCCTCCCGGTAGTCGACCGTTTCCTTCACGATGTCCAGGAAGAATC[T/G]CTCCACATCGTTGTACGTGATCTTCATGTGCAGATTGCGCACCAGCGTCGGGTAGGACGA	[T/G]	2R	28492400		S	0	1
CYP6P3-M-490	GTACTTGCGGAACTCCGAGTCTGTCGTCTTAAGTGTATTGCACTCGATGCCGAACGCGCA[A/C]GTCCCAATCACGTCCGTCGTAAAACGGCCCAGGATATCCTTCATCTCCACCTCCGGTTGG	[T/G]	2R	28492575			0	0
db5549269	CGCAATAAGCATAACTATTGGAAGGACAATGGATTTCCGTACGCTCCGAATCCACACTTT[C/T]TGTTCGGGCATGCGAAGGGCCAGGCCCAGACGCGGCACGGCGCCGACATCCATCAGGAGC	[A/G]	2R	28493015	rs5549269	S	0	1
CYP6P3-E-318	CCTAGCAGTCTATATAACTTGCCGAGCAACACCCGTACCTGCTCAGTTTGTCCCGGTGGC[T/C]CGAATTAGGCAAACGATGGAGCTAATTAACGCGGTGCTGGCCGCGTTCATCTTCGCAGTG	[T/C]	2R	28493157		IGUD	0	1
CYP6P3-E-179	TAAATATCKCCACCCGATGACTAGTACWATTTATGCTTAGGAACATCTCAACGAATTCAC[T/C]GCACCACACACAAACACACTGACAGYGTGTGCTGATTTATCTGCTGGCCACCGTATTTCG	[A/G]	2R	28493296		IGUD	0	0
CYP6P3-E-88	TCTTCTAATGACCTCYCTGCCAACATCACGCTGTTGCAAAAAGGCGAAAAAACCACGCAC[A/G]CGCTGATACCAACACACTGGAAGTTGTTTGTAAATATCKCCACCCGATGACTAGTACWAT	[A/G]	2R	28493387		IGUD	0	1
CYP6P5-snp2	GTGGTCHGGATCGCGCTGGATCGCGTAGATCGRTATCTGTACGACCGTGTCCTTCGGTAC[T/G]ATGTGCCTGGTGCCGGGTATCACATAATCASTYGACGGTTTRCGTGTGAGCGTTTCAACC	[A/C]	2R	28494353		S	0	1
cyp6p5-201	ATGAAAAAGTCTTCCACGTCCTGCTGCGTCGTACGGACGTGTAGCTTACG[A/T]GCCAGCTGCGGGTACGASGTGGCAAAGAARAACTTTGTCAACGTKATCG	[T/A]	2R	28494944		S	0	0
AGAMP3_2R_28495346	GCCCGTGAATGGGTCATCTCGCGGATTGGAATACACGCCACGATCGTGAAACACGTTAAA[A/G]TCCTTCACCAGAATCGTCTTCACCAGCTCCGGATCGACCACGATCAGCGACGGCATAATG	[T/C]	2R	28495346			0	0
CYP6P4-snp3	CACGCTGAAGAATCCGGACTCGGACTTCCGCAAGTACGGCAACAAGGTGTTCGAGCAGGA[T/C]ACGCTGCTGATGCTGAAGTTTATGTTTGCGACCACGTTCAAGGGTTTGGCGAAGCGCATC	[A/G]	2R	28498027		S	0	0
CYP6P4-snp2	CTGCTCGAACACCTTGTTGCCGTACTTGCGGAAGTCCGAGTCCGGATTCTTCAGCGTGTT[A/G]CACTCGATGCCGAACGCGCACGTCCCGATCACGTCCGTGGTGAAGCGGGCCAGCACATCC	[T/C]	2R	28498090	rs5553601	S	0	0
CYP6P4-snp1	GCTSGAGGGTCACGAGTGGCGCGTGCTGCGCCAGAAGCTTACGCCCACGTTCACCTCCGG[T/C]CGGATGAAGCAAATGTTCGGCACGATACAGCAGGTGGCGGGCGAGTTCCTGAAGTATATG	[T/C]	2R	28498243	rs5553021	S	0	0
AGAMP3_2R_28498612	GGGCTTCTGGCGCGTGTAGGGAAAGCACCGATCACGCCAATAGTTGTGCCGACTGCGCAG[A/G]TATAGGTACGCAATCGAGACGACGAACACGAACGCGGTCAACACGTAGCTTAACAGATCC	[A/G]	2R	28498612		S	0	1
AGAMP3_2R_28499261	CAAACTCATTCTTTATTATCATCCACAAAAAAAGCACCCCCGGCTACGCTTCACACCTGC[A/T]CGATGCGCAAATAATTACCCCCCGCAGGTGAGAGTATGAACGATTTCGGATCGAACACGA	[T/A]	2R	28499261		NS	0	1
db5510707	CCGCTTCACCACCGACGTGATCGGGACGTGCGCGTTCGGCATCGAGTGCAATACGCTGCG[C/G]AATCCGGACTCGGACTTTCTCAAGTACGGGCGGCGGGTGTTCGAGCATCGCATGCTGGCG	[G/C]	2R	28500263	rs5510707	S	0	0
db5509216	CATGCCGATAGTGATGGTGTGCGATATCGAGCTGGTAAAGACGGTGCTGGTGAAGGATTT[C/T]GCCGTGTTTCACGATCGCGGCATGTACAGCAACSCGCGGGCGGACCCACTGTCCGGCAAT	[A/G]	2R	28500557	rs5509216	S	0	0
Cyp6p1-2-inter-snp3	GGCGTTGAGAAACGATCCCGAACGyACACGTATCGAGCTGGTTGCTAGAATGTTAATGGC[T/C]TGTTTACACGATTAGACCGACTCGCGAGAGTATTGGGRATCGGGCAGCGTTCGGTTYCCG	[T/C]	2R	28500996			0	0
Cyp6p1-2-inter-snp2	ACATTCTAGCAACCAGCTCGATACGTGTRCGTTCGGGATCGTTTCTCAACGCCAAAAGTG[T/C]TTTTATTCACATAAACAATCCACCATATGGAGTGCGTTACGCGCGGCATATACTATTTSC	[T/C]	2R	28501064			0	0
Cyp6p1-2-inter-snp1	AAAAACCGAGTTGTATTATATTTATAGCATTGATGTTTGTAATGTTTTCCCTTCCGACG[A/G]TCGGCTGTCGAAACTTGAGCTGCGGAACGCGCGCGTCCATTGCGTCATCGGCAGSAAATA	[T/C]	2R	28501171			0	0
CYP6P2-snp1	CGTCTCGAAGCCGGCCAAAAAGAAGATAAACACCTGCGCCGCCAGCTCGTTCATCGTCAT[A/G]CCGACCTCCCCTTTGCCAATGTGGTCCTCCTCCCCTTCCCACAGCTTGCCAGTGTTTTTG	[T/C]	2R	28502007	rs5491507	S	0	1
db5490518	GCAACAAAGTGTTCGAGCAGAAGGTGTCCACCATGATCAAGATCATTTTGGTGCTGATGG[C/G]GCGAAAGATTTCGAGCAAGTTTACGCTCAAAATTACCGACGCCGATGTGGAAACGTTCTT	[C/G]	2R	28502212	rs5490518	NS	0	1
CYP6P2-snp2	CAATACGCTGMGCAACCCGGACTCGGACTTTCTYAAGTACGGCAACAAAGTGTTCGAGCA[A/G]AAGGTGTCCACCATGATCAAGATCATTTTGGTGCTGATGGSGCGAAAGATTTCGAGCAAG	[A/G]	2R	28502253		S	0	1
AGAMP3_2R_28502388	CGCGCACGTCCCGATCACATCGGTCGTGTAGCGGGCCAGCACGTCCTTCATCTCCATCTG[T/G]CCGGTGTGCGTGGCCACGTGCTGGCCCAACCGCTCGGCCACCTCCAGCACCGTGGCAAAC	[A/C]	2R	28502388		S	0	0
CYP6AD1-snp1	TGTACCCTGCGGGATGGTCCCAAACCCGTCAATGGGATAGTCATTGCTGGCGACACGGAA[T/C]AGGAAATCAACCGGTGGATACATTCGCAGTGTTTCTGGGTTAGGAGGGATRRGAKRMRRT	[T/C]	2R	28504638		S	0	1
AGAMP3_2R_28510609	CCCCTCAGATACGTTCGCCAGTAAGGTCGCTGCCATACAGGACAAGTACGCCGATGCCAG[T/C]GTCGGCAACGTGACGGGAAGTAATGCGGTCAACGTGTTTCTGGGTATCGGTGTCGCCTGG	[A/G]	2R	28510609		S	0	1
VATPASE-D-5	CGATTTTCCAACCTGCCACAGAATACAAAACCTTTCACCACGTGCGAAAGCGTCGAAAGG[A/G]AACACGGGTAAACAAACATCCCGCTAGGACGCACMCGAAGAAAGGTAGAATTCGGTTCTC	[A/G]	2R	28676628		IGD	1	1
AGAMP3_2R_28883608	GAGCTCCCCGCCGTGAACCTCTGTGTCACTCTAGTTGTGAGTTTGTTTTTTAAGAACCTT[A/G]TAGGATGAGAAAGGGAGCaaaaaaaaCAAGAAAGAAAAGACGCGCGCGCCACCAAAAGAG	[T/C]	2R	28883608		IG	1	1
AGAMP3_2R_28976843	TATGTTGACGCCGTGCAGAAAGCTGCGGATCTCATCCTCGGTGATGCTCCACGGGAGGCC[T/G]CGCAGCCGTACGTAGTGCGGTTGGTTGCCGTCGTCTTCCGGCACCGGGCCACCGCCGCCC	[T/G]	2R	28976843		S	0	1
db5452034	CTTCAGCAGTCCCGGGCACACAAACACACCCGCCGACCGAATGTTGTTCACGAAGCTGTT[C/T]GGATTGTTCAGATCGCGCAGCGGCTCCACGAACGGATCGTTCGGATCGCGCAAACAGTGC	[A/G]	2R	28982168	rs5452034	S	0	1
db5453341	CGTGAACGAAATCACACCGGTGGACGTATCAGCACCGGCCACATAGAACAAAAACACATT[C/T]GCTGCACACTGGGCGATCGTAAGCGCATCCTGTCCGTTCGCTTCACGCCTCAAATCGATC	[A/G]	2R	28982411	rs5453341	S	0	1
AGAMP3_2R_28982492	GGCCGGTGCTGATACGTCCACCGGTGTGATTTCGTTCACGCTGCACGAACTGACGCACAA[T/C]GGGGAAGCGATGGCTAAGGCACGGCAGGAGATCGATCACGTGCTGGAGCGGCACGGTGGT	[A/G]	2R	28982492		S	0	1
AGAMP3_2R_28986918	CACTTCCATCTTCCAGCACCCTACAATAATTGAACTAATTCCGGCCGTGTATGGTTGACC[A/G]CCGGTACCGGGCCGGTAAACGCTCACTCTTGCTAAATAtatgtggtatgtgcgtgtgtgt	[A/G]	2R	28986918		IGD	0	0
AGAMP3_2R_29080036	ATAAATGTAAGAAGAGAAGAAAATATTTTATAGATGCTTCTCATCGGTCTGCAGTTTTAG[T/C]GAGATTTTCCTTCTCTACCAAATTCAAACAAATGTGATTGTTTTATTTGGCAATATGCGT	[T/C]	2R	29080036		IGD	0	1
GSTZ1-1-snp3	TCTCACTCCGACYGGTGTTACWAAAYGTGHATWTGTYCCGTTGTAGGTGATTGCATCCGG[T/C]GTTCAGCCACTGCAGAATCTGATAGTGCTGATCCACGTCGGYGAGGAGAAGAAGAAGGAA	[T/C]	2R	29081144		S	0	1
AGAMP3_2R_29083081	CCTAAACGCCCAGTTCATCTCGCGCTTCGGCATTGTGATCACCCAGATACAGGAGGAGAA[A/G]CTGCGCGTGAAGGACGCCATCCTGCAGCACGCGCTCGAGATCGGCAACACGCAGAACCCG	[T/C]	2R	29083081		I	0	0
GSTz1-3-snp2	RTCCGTAATGYCGGCATCCTCGATCGAYTGTAACGTTTCATTGCTCGTTCGTCGAAGCGT[T/C]ACCGTCGCGTTAGCGAGCATTCGTAGCTGATCGGTGTTGAGCTGGCGTGTGGCAGCTGAA	[T/C]	2R	29090568		I	0	1
GSTz1-3-snp3	TGCGTGYAGGAACATTGTGCTGGATTTGCAGAACCAGTACACCTGGTACGCGGTGGTCGA[T/G]ATGAAGCAGTGCGCCTGGTATACGGCCCAGGACATGGTACCGTGGACGACGAGCAGGTTC	[A/C]	2R	29090691		I	0	1
AGAMP3_2R_29094032	GGCGCAGCGCATCATGAAAACTGCCACCTACCAGGTCATCCGCACCCTGGGCATGAGTAA[T/C]ATTTTCAACCGTGAGGGCATTCGCGGACAGCTCACCGATGAGCTGGAATCGTATCGGAGC	[A/G]	2R	29094032			0	0
GSTz1-4-snp2	TCCYGTKACGGTTTCGCTGGCTAGTCGATTYGCGGTTGAATGTGCTGCTACATATTGCTT[A/C]CCGTTTCGCAGTTCTAAAATCGAACCGTGGAAATAGTCACTACATTGCGAAATATCATCA	[T/G]	2R	29094942		I	0	1
AGAMP3_2R_29097229	TGAGAAATCATCCCACCAAATCGTCAAGATCGTCTTCGGACTCCTCCAGTGATTTTAGCA[A/G]CTTGTCATCCTGCACTGCTAGGTCGAGCTTTTGTTGATTGATTTCAGCTGTGCTGCACGT	[T/C]	2R	29097229		S	0	1
AGAMP3_2R_29462331	GAGAAAACATACGTATCCGACCGATTCGAATGTATCGGACGCTTTCTCTCCCTCTGTCTC[T/G]CTGTCTCTGGCATCTTGAGAAGAAAACTAACCTCTTTCCGTTCACGAAATATGACTATCC	[T/G]	2R	29462331		IG	1	1
AGAMP3_2R_29958921	ATCCATCCCGCCGTTAGGTTGCGGGAGAGCGAAAAAGTGAACGTGAACGTTGTCAGCGAC[T/C]TGACTACGAATTGGCTACTGTGTAGGACTGAAGTTAATCCTTAGCTGCGGTAGTAGTGTT	[T/C]	2R	29958921		I	1	1
Agama1-1-snp2	GCGAAGCGTGAAGGTTTCGGGATAGCTTTAAAGTTTCTCCACTGTCCATGGTACGCCACC[T/C]CGCCTGACCATCCGCTGTTCTTCCGGATCCGGGTTTCGGTCAGCCAGTAGTGTCTCGCCG	[A/G]	2R	30466192	rs5340186	I	1	1
AGAMP3_2R_30972609	ACACGCACTTTGCAACAGAAGAAAGTAACACAAGCAACTTTGCACACTTTTTACCTTTCT[A/G]TCGGTAAAATTGGGGAATTTTGGTCGTCGTCGCCGCTTGTTCCAATCGACAACAAACCAT	[T/C]	2R	30972609		I	1	0
AGAMP3_2R_31421267	GGCAGAGATTGACTAGAAAGCCAGCCTATCGGAAGAGAGTATGTTATCAGAAGGATGAAG[T/C]AAAATGGAACACACTCCCTTGAGGGGGAAGAAACAGACGGGAAGAAAGCTGTACTGGGAA	[A/G]	2R	31421267		IG	1	1
CYP11179-U-snp3	GRCGCYCTATACCAACGGCAATCTTGCCGCACCCAACGGGCGCTCGCTCGGTGCGGGAGG[A/T]TTCGGAGCAGTATTTTTAGCGCTCAATCTCGCGCCATCCATTCCCGTGGCCGCGGTCAAG	[T/A]	2R	31943039	rs3613163	S	0	1
CYP11179-U-snp2	CCAGTAGTAGCGGTATACGCATACGASCATCTTCGCGWGGTCACGGACGGATTCAACGTG[A/G]CGCYCTATACCAACGGCAATCTTGCCGCACCCAACGGGCGCTCGCTCGGTGCGGGAGGWT	[A/G]	2R	31943098		NS	0	1
AGAMP3_2R_31946099	ACACTGTGTGACATCGATGACCTGCACAAAACGGATACATCACACGTTAGTCGCTTGTTT[T/C]CTTTACCCCCACAGTTCTCTTTACACTTACCCCGCGCAGCTCCATGTCCACATTGTACTG	[T/C]	2R	31946099			0	0
AGAMP3_2R_31946787	GGTGTCCTCTTTGCGCTTTTCCGGCTCCGGTGGCTTCTCGTTCGAATGCAGTCCCTGCGT[A/G]CAGCCCTTGATGTTGAGAAACTCGGTAAAGTCCACACTTTTCTTGTTGCAGCACGTCCAT	[A/G]	2R	31946787		S	0	0
CYP11179-snp1	GCATTGCYTTCCKTCCRGCTCTGTAAARACCATCMAAAAYGCTTCATTTTTGGTAACTGT[T/G]TATCACCTTAAACCAGCCTTAAGCTATATMCACTTACACCAACAGCGATTTTGCCCTCTC	[A/C]	2R	31948611		I	0	1
CYP11179-snp2	CACCAACAGCGATTTTGCCCTCTCTCGATCGTACCGCTCACCGATCGTTACCTGCAGAAA[A/T]ATGTTCGCAAGCGTCACCAAAAACACATCCGGACATTTAACTGCTCCCCCGTCCCGCATA	[T/A]	2R	31948708		S	0	1
CYP11179-snp3	GCTCCCCCGTCCCGCATAAAGTCACGCTCGTACCCGTACCGCTCGCCGGACGCTAGCTGG[T/C]CCACCAGCTTCCACAGTTCCTTTTCCATCTCCTGCTCGTACTGTTCCGATCGCCGCCCGA	[T/C]	2R	31948811		NS	0	0
AGAMP3_2R_31950073	CAGCGTGTCCTTGGGCAGGTCGTACCCGCGCAGGGTCGTGTCCTCCTGCACGCGGTGCGC[A/T]ATCCCGGACGGTACGAGCGTGTCGATGCGCATCGCTTCCCGCAGCGTTGCCTCCGTGTAC	[A/T]	2R	31950073			0	0
CYP304B1-snp3	MGAYGAAGTCGTCGGACACGGCCGGCTGCCCACGCTGGACGACCGTACCCAGCTGGCGTA[T/C]ACGGAGGCAACGCTGCGGGAAGCGATGCGCATCGACACGCTCGTACCGTCCGGGATTGCG	[A/G]	2R	31950130			0	0
CYP304B1-snp2	CCTGCTGTTCGAGCGGCTYCTGCACAACCCGCYCGTSATCGAGCGGATGCAGCGGGAAAT[A/C]GAYGAAGTCGTCGGACACGGCCGGCTGCCCACGCTGGACGACCGTACCCAGCTGGCGTAY	[A/C]	2R	31950190	rs3442639	IGUD	0	0
CYP304B1-snp1	ACCGTTCTTTGCAGAYGATCAGCTACTGCTBGGGCTGGTCGATTTCTTCTTTCCCGCCAT[A/T]TCCGGYGCGACGACCCAGATGGCCCTGCTGTTCGAGCGGCTYCTGCACAACCCGCYCGTS	[A/T]	2R	31950274			0	0
db3442778	TTTTGTCGGTAACTGAACCGGTTCGGGCATCGGTGAAGTGGTTTTATAAGCGATAACCGA[C/G]CCCCGCGGGATGGCATGCGGGATGGGGCGTAGCAGAGGGAAAGCGGGCCCTTGTCCCGCT	[G/C]	2R	31951551	rs3442778	IGUD	0	1
AGAMP3_2R_31952277	TTCTCAAGGTGCTGTAAGCACATCGTCGTTCAATCACTACGCCTAGACTGCACTGTGTGT[A/G]CGTGTGTGTAAATATCGATATAGAGATTTTATTTGCATTGGTTCGAGTATTTGCCAAGTT	[A/G]	2R	31952277			0	0
db3442889	CGTGCGGATTACACCGGTCAGATGCTGCTCCGGATCGGGCGTGCGGCCTTCCATGCTGAA[C/G]GTAAACTGCTGCACCAGCGTGGTGAGCGTTAGGAAGAGTGCATTGCGCGCAAAGCTTTCC	[C/G]	2R	31952612	rs3442889	S	0	1
db3443494	GGAAACCGTTCCGATGGACGGTGCAGTGCGTATCTTATCGCGCACGAAACGATCAGCACG[A/G]CCAGTGCGACCAGCAGCATTAGTTCCATCATCGATGTGTTGTGACGGGGTGACGATTACG	[T/C]	2R	31954305	rs3443494	NS	0	1
AGAMP3_2R_31957778	CCCCGTGAAgaaaaaaatcgtaccaaaaccaaaacaaaaTTTTAACAATTTTATGACTTG[A/T]ACGTCCTGATTATCGCATTATGACCTTTCTGTATTAACCCTGTGACCATTTGTTGTTTTT	[A/T]	2R	31957778		IGU	0	1
AGAMP3_2R_31976690	ACAGTGTTACTTTTGCATTTGCTCACCCTTCTCCACCAGGGAGCTTTGTGTTTACCCTTT[T/C]TACTAAAATCCATTTCCGTTTCGCAGTTCGGTCCATCATGCACGCTTCGAATGCGAATAA	[T/C]	2R	31976690		I	1	1
AGAMP3_2R_32464060	AAACGTGTGTTGGCTCTCTGTTGTGACCATGTGTGCCGTCAAGAGTTGTGTTTGCTGAAG[A/C]GAAGGCTCAAAGAATACAGTGAGATGCAAAACTAAGAGTTGCACTTCAAAAGTGAATTGC	[A/C]	2R	32464060			1	0
AGAMP3_2R_32667825	CATTATGTGCGTTACTATTTCCGTTCGGGCTACCTTCCTGCGCGGGATAAACGATACGCT[T/C]ATTTCAAAACCAAACACGAACCAATCCTTCCCTTTTTCGAGTTCCGGTTCGTAGACACAG	[T/C]	2R	32667825		IG	0	1
AGAMP3_2R_32671124	CACCGCTCCCGAGCGTAGCGTGCCATGTGTTCGGAAGCCTTTCGGATGGTCGCCTTTTCT[A/G]CTTGACAACATGGAAATGATCAGTAGTCCTGACAGCGAACTATGGATAATACTTCCGTAC	[A/G]	2R	32671124		IG	0	1
COE23935-2-snp1	TCCRATGTGCAAACGTCCTCCGATTGRTAAGCGCACGGGCGGCCGAGAAACGGAACACTG[T/C]ACAACACACTACRCCGTGTCCACCACCGTGTGTATCATTTATCAGTCCCGACCGTCATAA	[T/C]	2R	32676032	rs5186443		0	0
COE23935-2-snp3	GAAACATTTTGTCAACAGCAAACGACCGATAAGATGCGMCCGACCGCTCTTTGTCTCGCA[A/G]CGGACAACAATACACCAGCACACCCGGGGCAACACTTTCCAAACAGGCCCCGCGAGGCCR	[A/G]	2R	32676160		IG	0	1
AGAMP3_2R_32677142	ACAGCATCGTCATAAAATGTTGTTTTTAATAGTGCGCGCATTTGATGGTGCTTAGTGTAG[A/G]TAGGGAGCGAGTGAGTGATAGAGAGAGGGAGAGTGAAGaaaaaaaacgataaaaagtgaa	[T/C]	2R	32677142		IG	0	1
AGAMP3_2R_32677411	CTAGTGTTTTGAAGTGTGCAGCAAACGCGCAAAAACCGACCACCACCCTTCCAGGCGAAT[A/G]CGGTTCGCTCTCGCAATGTGCATCCGCTTCGAGCACGAGTCACGTAGATCGAGTAATTCT	[A/G]	2R	32677411		IG	0	1
AGAMP3_2R_32682579	TACTTCTTCTTCTCGTACCCCTTTTTGCTGGTGCTACTAATGCGAATCAATCGTAGCAAC[A/G]TTCGTAGCATTGATAAAGCTAATGGAGCACGTTTCGGTTTTATTTGTCACACGCACGAAC	[A/G]	2R	32682579		IG	0	1
AGAMP3_2R_32736812	TCCAACGCGTACGCCGTCGCCCTGGGACGGCATACGGATAGCGGATAAGTTTAGTCCGGT[A/C]TGTCCCCAGCGACTGCCGAATGTAAATAACGAAACAGCAGCTTTAGATAAGATGCCAAAA	[T/G]	2R	32736812		S	0	1
AGAMP3_2R_32738360	CAAGCTCGCGAAGGAGGTGAACTGCTCCATCCCGGAGGATCTGATCAAAAACCACGAGCA[A/G]ATCGTCGACTGTCTGCGGGACGTGCCGCTGGAGGAGCTGTTCGGGGCCGACATTCAGCCG	[T/C]	2R	32738360		S	0	1
AGAMP3_2R_32742725	GCCGCCCCGCAGTGAACACATCGCCATCCCGATCAAAAACTCGACCTTCATCGGGAGCGG[T/C]ACCGGTACGGGCGGGGGGACGTTTGTCAGCGGCATGATGACACTGCCAAAGCCCAGCTCC	[A/G]	2R	32742725			0	0
AGAMP3_2R_32746086	CCGCCAAAAGCAGTGTCGCCTTTAATCTTGATTGATGGCGGGCATCCGCAGGAAAAGCCA[A/C]CGCGCATTAACGCTCGCCACACACCCGCTGTTCATCGTTTACCCATTCATCGCATTGTAT	[A/C]	2R	32746086		IG	0	1
AGAMP3_2R_32972489	CAACTTTTCACTTGCCATGGAGTCGTTTGTGTTTTTCTTTTTATTAAGTTCCCGGCAGCT[T/C]TCTGCTAAGGGTACAGTGACTTTGGGCAAACGATCCGTTTCATGTGTGGCTAACGGGGTA	[T/C]	2R	32972489		I	1	1
AGAMP3_2R_33458715	GCAAAGATCTTTCTCAACCTCTGTCATTGTTTGTGATAACTGTGCTGTTGAAGTAAGTAA[A/G]TGCTGTTGaaaaaaaaaCACCTCTCGCGATTGTTGAATAATGCAGTTCACATTAGAAACT	[T/C]	2R	33458715			1	0
AGAMP3_2R_33576920	AAAATGGGTCAATGCGGAAAGCTACTTCGAGACGCACAACGTCACCGACGATAATGCGTC[A/G]AGTGTAATGGATACAACGGCCGAATTTCTCACACCCTGTAAGGTGCTGATGGAAGATTAC	[A/G]	2R	33576920		IGD	0	1
GRX2-snp3	GATGAATTAATCAACTTGTTTCTTCCCCTTTTCTCCAACAGCGGCACCATTCATTGAGAA[A/G]GCGATCGAAACGAACGCTCCGGAGAATTCGCATTTCATCTACGTCGATGTGGGCGATCGT	[T/C]	2R	33578674	rs3615092		0	0
GRX2-snp1	ATAGCCGTTCATCATGGTGCATAAACATCATGTCSCCGGATACGATGCATTCGTTGCATT[T/C]ATGAAAGACTTCAACGGAAACGGCGGTGCGATCAATATTCTCTTCACCGGCGCAAAGCTC	[T/C]	2R	33578868	rs3615147	S	0	1
GRX2-D-snp1	TTTTTTGTTTCTCACTTAACAGGTTCAGCCCAACATCT[T/C]GACAGAACTGAAAAAAAACAAAGCAAAATCTAATTAAAATTATATACCTGAAGTAAACTG	[T/C]	2R	33584065		IG	0	1
AGAMP3_2R_33951887	CGTCCACGTTCCACCACTCGGAACTAGGAAGTTTCCTACCTATCTGGTTCACCTAGTTTC[T/C]TCGCATGAACGATCCGGTAGCATGCGAGTCAAacacacacacacacacacacacacacaG	[A/G]	2R	33951887			1	0
ADRENEX-2-247	TGGTTTTTCCGGCAGACGGTCGTAGTCCGCTTTCGAGAAGATTAGATGGCACGTGGAGCA[T/C]GTTAGCGTTCCTTCGCAAGCGCCGAATCCTTCGAAATCGATATTGTTGTTAACGATGACG	[A/G]	2R	33989909	rs3441615	S	0	0
ADRENEX-1-219	CTCCCATTCAAGTCATAGCCGATTCGAACGACGACGGTGAAATATCATCATGTTCCGACT[A/G]GCGGTTACGTCACGGTTCCTCTGTCAGCAGCTTGCCCGGACGGAGCTGGCCACCAGTGGC	[T/C]	2R	33990951	rs5389820	S	0	1
ADRENEX-1-62	CTAGCGTAAAGCATAACCCTTTCCCGTCGCCGCTAGTGTGCCAGTGTTACCCGTGTGCTG[T/C]AGAGAATCTTGCCAGCTGCTCAARAAAACCGTACCCTTATCAGAAAGGACGATCGACGAC	[T/C]	2R	33991108	rs3441758	5UTR	0	1
AGAMP3_2R_33994551	CCAAACTGCTGCTCCGAAAGCCCTTTTGTCAGCGCTTTCGCCGGGCTGTCGGTGCGATTG[C/G]TTCGCTCCTGCTTCAGGAACTGCTGCACGTGGAACTTGGAGCGTATGTGGTCGAGCTGTT	[G/C]	2R	33994551		IGU	0	1
AGAMP3_2R_34450134	CCGTACACTAGGGTCTGATAAGGTAGAAGACAAAGGACCATCGCCCATATAGTCTGAAGC[A/G]CTGTGTTTGCTTTTGTTTCTTTTTTGTTACGGTATGTTTATTACATTCTACTTAATCAAA	[A/G]	2R	34450134			1	0
GSTU2-U-snp1	GATCAGGTGAAAAAAATACCCGACACCTCGACCGACTGCTCCTACTTTTGAGTCGGTTGG[A/G]TTTGATTTCCCCCYTCCGTAATCGCGTGACACTCAACGCACACACAGCACCGTAAACAGC	[A/G]	2R	34492391	rs3549885		0	0
GSTu2-snp1	GTAAACCAAAGTACGGTAGTAGTTTAAAACTTTCCGATGAAACAATACACATGAACACTC[T/G]TGGTAGTGTTACTTACGACGGCGGAAGCAATCGTCGGCACCAGGGAAAGGTCTGCRATGG	[A/C]	2R	34497338		I	0	0
GSTu2-snp2	ACTCKTGGTAGTGTTACTTACGACGGCGGAAGCAATCGTCGGCACCAGGGAAAGGTCTGC[A/G]ATGGTGAGATTTTCCCCGGCAAAGTAATCGTTCCGTGTCAGATAGTGCTCCAAGTCGGTG	[T/C]	2R	34497394	rs3549739	S	0	1
AGAMP3_2R_34499801	GGTATGCGAGCTACTGGAGCATGTGATGAGCATCTGCTCTCCATTGCTGGTCGTTTCTTG[T/C]GGCACTAACCTGTACCTGATATGCTATCAACTGTTCCATCTCGTTGAGTAAGTTGCTCTG	[T/C]	2R	34499801		S	0	0
GSTU2-D-snp2	GAGCCCAGCGYAGCACTTTTCCAGCAAACGATGGCGGGCCGGGATGTAGAGAAAAATAGA[A/C]AACTCTCCTGTTACGGGATATTGTGCCTAAAAGCACATAAATACGSAAACGCTTACCGGA	[A/C]	2R	34502120		I	0	1
AGAMP3_2R_34955717	ATCATAAATCACTTTCGGCGAAGTGTAACACAAcaaacaaaaaacccaaaaaaTGAATCG[A/C]GTTGAGCGCGTTCTTTACAACGATTCTTTCGATTGATATACTTGGCTGGGAGTGTGAAAC	[T/G]	2R	34955717		IG	1	0
AGAMP3_2R_35461386	GAAGGTACGAATGACAGCTGGAAACGGTGGTTCCCGGTCTGttttttttCTCCTTTTGGT[T/C]GCACACCGTACTTGATGCTACATTGAAACGAACGAGCTCACGATGAAAATTCTTGAATGT	[A/G]	2R	35461386		IG	1	1
AGAMP3_2R_35932019	TTATCGTATATATATATAGGCAAAACTAGCACTGTAAGCGAAGCATGTCAAAGAATATCA[A/G]TGTAATAGTGTTGTTGTTTCAATCGTTAAACAAATAATCTTTCTCCCTTTTTGCTGCTGG	[A/G]	2R	35932019		IG	1	0
TRX3-u-2	CAATGWGCGAGATGCAGCGATATTCGAAYGTCAAAAACCCTCGCCATGTTGTACGGGAATATAACACCAAGTRCAGTACATGCCTGCGGAAGAAGAAGCAAAACATTTCAGCAAGGCTCCACAAAGGGAAAAACTGTAAATAAGAAATTCCGTAG[C/T]CGTGCCCTGCGACAACGCGTTCCAGAAAASTCCCACAGCTCRAGGTGACGAAACCGTARCACGCCTGCCACATATCCTCGTYCCCATCTGTTTGGCTGGAATGGGCGACAAAGTGCTTCCAGAGGTTTCCAAAAGCGACGACGAACAGTTCGAGGATGCACAGAGCAAGGAAGATTTTAACGAGCGAACCGTCGACGAAGTTATCGAAAAGGTGATGGGACTGTCGGTCCGGAGGCCAC…	[A/G]	2R	36288071	rs3587052	IG	0	1
TRX3-1	TGCGCGACAGATGTACCTAGAGGCGGGTTGTTGCCGCATGTATAACGCATGTGCCAGAGCATTCCATATCTTCTTTTCTGATTACCTCTGATTCGTTACCCCTTTTCTAGCGACGTRAGAGATAACACACACTCAACACAATGCTCCGTATCTTCCGCAATGCCATCCTGGACAAACGCATCACCCGCAAGACGTTCTCCTTCTCAGCCATTGCGGC[C/T]AAGCGCTACGTCATAAAGGATCACTACGAGTTCGACCAGAAGGTAAACAACAACAACACCACGCGAAGGCCACTCGCTCGCACAACAGCTGATAGGCTGCAGAAGTCGTTGCCCGACCTTCCACAGTSGGTTTATTTAYCCCAKGTTAACCCTTGCCCCGKTCCCTCTTTTTCCCCC…	[T/C]	2R	36292949		S	0	1
TRX3-d-1	TTTTTGCTGCGATACGCAGYTGCCCNNAAACTCAGGCAGAGCGAAATGGKTAAACCAAAAAGATCGC[A/G]CACTCATTGAAAACTTCCATGCTTRGCAACCAYGTTCGARTCTACGRAATAATGYCATGCTAAGGGATGCAACAACTATTGCCARCAAAACTATAGAATTTGTATRGAAATTAAAACACAACTCARCTMTAACAATGGTAGATCCSATAACGGKACAGARCAAGCTTTATGCGTAAATTATAATAATTATTGCATAGGAAAATCAATACGCCGAATCAATCGTTTCTCGCCAACTGTGTGTTGYGCATGCCGCGTGCCAAAAAAAAAAAACAAAAAAAAAGAACGTTTAGCACATTTTGG	[T/C]	2R	36297892			0	0
CYP6AG1-U-snp1	CAYGRCGTCTACCGTACTGGGCGGAGCGGTTTTCGGTGGGTTCGCATCGTCCTCCTTCTT[C/G]AASTCAATGCTCTTCGGTTGTACTGCTTCTTCAGGTGCTTTTACAGCTCCCTC	[C/G]	2R	36309561		NS	0	0
CYP6AG1-U-snp2	TGAGGAATGTTCAGTGTCATTARTGCTTTCCTGCGGGTCGTTGGTGGCCTTGGCTGGGCG[A/G]TGTCCTTTTGTACGGTGCCGCCACTACCTCGGGGCGATCGTCTCGATGGGRCCGGCGGAT	[A/G]	2R	36309719		NS	0	1
CYP6AG1-U-snp3	CGGCTGTAACGGATTTGGAGCGCARGGAACGACGTGYCRCCGGAAGGCTTGCTTCAACCA[A/G]CCGATCATCTCCTCCGTCCAGCTGAGGAATGTTCAGTGTCATTARTGCTTTCCTGCGGGT	[T/C]	2R	36309802	rs3585051	S	0	0
CYP6AG1-snp2	CTCCCTYCTTAGTTATCGCTTACCGTACAACACYTGATCGAGGTAGGGCAGTTCCAGCAG[T/C]GCATCGTAATCGATGCTGCCGTCCTCATTCCGAGCGGCCATCAGTTCGCTCCGGAGYGTC	[T/C]	2R	36315659	rs5042904	IGD	0	1
CYP6AG1-D-snp2	KATTGTAAAGGTCATATYGATCAGCGTATGCAGATRCACTCACCACTTAACTATCCGGAA[A/C]GCATCTTTCTTCGGTAAAACTAGATCGATGTGATTTTCGATGGTGGGAAACTGCTCAATC	[A/C]	2R	36319856		S	0	0
CYP6AG2-snp1	TGGTTCCACCKCCCRCCTGCTTWGCCTTTGCAATTTCATCGCGCAGCTCCTGCTGGATGG[T/C]CGGATATTTGGCCAGATCGTACAGGCAGTAGGTCAGCACRATGCTGGATGTTTCAAACCC	[T/C]	2R	36324343		IG	0	1
CYP6AG2-snp2	GTCGTACGAGCAGCTGGGKGAAATGGYCCTGCTGGAACAGATTATTTGCGAATCTATGCG[T/C]ATCCATCCGCTGATGGCCGTCATGGCCAAGCGGTGCACCRCCGATACGACGCTYGTCGGG	[A/G]	2R	36324465		IG	0	1
CYP6AG2-snp3	TACGCCTTGCTGCCTCCGTTTTCGGCCGCGAAYCGTTTCGGGTCGTACTTATACGGATCG[A/G]MAAAGTGTTCCGCATCGAAGCAGATCGAATAGTACGGCAGCACAACGGTTGTWCCCTTTT	[A/G]	2R	36324611	rs3587593	IG	0	1
CYP6AG2-snp4	TTTGCTGCTGACAGAGATTGAGAAACGYTCCACTACCTCTACTATCGCCCGTCT[T/C]ACCTGCGTCACAGCAAAACGCATCCCCAGACACATGCGCGGACCATCGCCGAACGGGAAG	[A/G]	2R	36324750	rs3587595		0	0
CYP6AG2-D-snp2	CTCTACGCAGGGACAGGAATACACGTTGGAGCAGCAACGGCTC[T/C]ACCATTCCCCACAGTATAGGAGTCGGTGTTTCGTGGAAAAAAAAGAAAAGAAAAGAGAAG	[T/C]	2R	36329423		IG	0	1
CYP6AG2-D-snp1	GCCCACCGAGTCGGTCGTTATCTCTTTCGCACCTCCACTGCCTCCYGCTACCGCTATCGC[T/C]TGGACACAAACAACAAGACGGTATTTGTTCGCACTTGTCCCCGCGTCTCACGATCACGGC	[A/G]	2R	36329761		IG	0	0
AGAMP3_2R_36471940	CAGTAACTGCTTACAGCTGTGCGACGAGCCCTTTTCTTGCTCCTAACACTCAAACTCGCC[A/G]CGTTCTACCAGTTCTACCAATGAGCATAGTGTGTTCCAGTGCATTGTTCTGCTGGAAACA	[A/G]	2R	36471940		IG	1	0
AGAMP3_2R_36961211	CTTTCTCTTATTCGTTCTTCCTCTGTGTCTGGCGTTGTTTTCCAGCACATCTCTTTGTTT[T/G]CTAGCATTACATCCTCAAAATAATTACACTcccccccccccccccccccAATCCATCGAC	[T/G]	2R	36961211		IG	1	1
AGAMP3_2R_37482024	ATTATATTTTTTTACAACTACAACAGCCCCCATCTTGCGGTACGGATGAATCATTCCACA[T/C]AAGTTGGTAACACCAAAAAGACAATAGACAAATTGTGCGCTGGTATTGGATGCCCAAAAT	[T/C]	2R	37482024		I	1	1
AGAMP3_2R_37977900	TTGAATGTGCTGCGCTCATCCAAGAATTCATTCAAATGTCTGTTTATTTTGACCTGAGAC[T/C]ACGGTATGATACAATGAGGTGATGCTTCAAGTTCAGACGCGTTCACCATTCTATGTTTTA	[A/G]	2R	37977900		IG	1	1
AGAMP3_2R_38464321	TAAAATAATGCGATTTAATTAAAAACGAAAATCGTTCCAATAAAATCCGTTCTCCTTCTC[A/C]AAGGATGTGTTTTGTTTGCGGGTTTGCGCtttttttttCTGAGGAAGTCTTTAGAAGCCA	[T/G]	2R	38464321		IG	1	0
AGAMP3_2R_38741673	CGCGTGTCCGATCCGGACTGGAACCATCTCGACTTCACCTGGGGCATCGATGCCGACTCG[T/C]TGCTGTACCGGCGCGTCATTAGCTTTATGGATCGATACAACTAAACAGAGCAAAAGGGCA	[T/C]	2R	38741673			0	0
AGAMP3_2R_38748346	CTGCCCCGGATCGCAGCACTCGATCGGCTTCCCGTCCACGCCCTGGTTCAGCGCGGTGGA[C/G]GTTATGTCGTGATCGAGAAACTGGCCCCACACCGCCAGCATCACGCTAAAGTTCGGATCG	[C/G]	2R	38748346		S	0	1
AGAMP3_2R_38959196	GACTAACACCATAAATCTAAACAGCGCCATCAATGTCTCCAGCGTCGATGAACCGCATAG[A/C]CGTACAATTGAGCATTTGTAAACGATTTGCCACCAGCATTCCTTCCATAAATTCAACAAT	[A/C]	2R	38959196		IG	1	1
ALDOL-99	AAACATCTGATTGTCTAAAGCTCTCGCGCGYCCCARYAGATCCCAGTGCAGCGGTCCCGT[A/G]TACGGATCGAACGCGGACGGGAAGATCATCATATCACAGCCCAGCTGTCGGTAGCAAGCC	[A/G]	2R	39064491	rs5040770	S	0	0
ALDOL-342	CGGAATGTCCATATCGAACAGATGCAGCTTCCTGTACTTGCACAGCAGTTCACCYTTGGK[A/T]CCAAACACGGGACAGGTGTTGTACAGCCTGGTGCCCTCGCGCTCCGGATATGTACCACCG	[A/T]	2R	39064734	rs5040771		0	0
Nitrilase-snp1	CGGATCGACCACCAGCGAATGCCCGTACGGAATCAGTTTCGCGTGCGTATCCCGTGCCGG[A/G]GARCAAAACGCCACAAACGCCTGATTGTCCAGGGCTCGCGCCTTCKCCAGCAGCTCCCAG	[A/G]	2R	39067225			0	0
AGAMP3_2R_39071503	TTTCAGGGGCAGTGGCATTTTACGATTGGCGGCCAGCGTTTTCAGCAGACCCGGTATCAG[C/G]GTAGTACGCACCACCTGAAACTCGAGCGTCTTCGGGTTGGCGATGTGCACCGCCGGGATT	[G/C]	2R	39071503		S	0	1
CYP329A1-U-snp3	AAAACGCGAGCCTCAGCGAAAGTAATTAGCTAACGGCACCAAACCCCTTGCTGGAATGCC[T/C]GYCCGGGTTTTGTTCGGTTGGATAGTATTGGAGAGTCGAAAGGGCAAGCCATTTCGACGA	[T/C]	2R	39109629			0	0
CYP329A1-U-snp2	GCGTTTTTATGCTCCGGTGGCAGTTTGTGTAGCCCCCGTGCTAACCTTAACCGAAAACAA[C/G]CMGCCAGTGTGTAGTGTGGTGCGACGGTTCTTGCTATGGTGAAAGAACTGCAACGCCGTA	[C/G]	2R	39109743	rs3603843		0	0
CYP329A1-U-snp1	CAAACATAACAACAAATACGCCCGTGYGCCTAAGAGMCTCYGTCTCGGGTTAGGTGGGGT[A/G]GAAAGGCTCTTCTGGAGAAATTATCCCCCGTC	[A/G]	2R	39109866			0	0
AGAMP3_2R_39110557	ACGATTGGGCTCGGCGGGCCAACATCCTGCCAGTGTTTGTGCTGGACTACCCGACCGACG[A/G]CGGCCAGTGGGACGTAAAGAAGGCACTGCGCATTCTAACCGCGGCCAGCGCGCTTGGCAT	[T/C]	2R	39110557		IGU	0	1
AGAMP3_2R_39112567	GGCCCGTCATCGACCGGCAATTCGGCGAAGGATCTCGGTGAATCAGCGCGATTTCTATCG[T/C]TTTGCTCCGGTCTGGGATCGAAGCCGAACTTTGGAGGGCGGTCAGGAGCAGTCTGACTGT	[A/G]	2R	39112567		IGU	0	1
CYP329A1-snp2	CGACACGTAGAGTTTATCACCMACCTTYAGCGGAATYGCCGCCCGGTCCCCATTCTCGGT[C/G]GCCGGAATGGTGAATGGTTTGGTGCATTCTCGAACCAGCAGTGGATGGGACGGCCACTTG	[C/G]	2R	39115399		S	0	0
CYP329A1-D-snp1	CATTTCCATGAAACTGATCCCACATACTGCA[T/C]ACTGGCGAATCGAGTCAGTGTAAATGATTTGAATAAATACGATTAAAAGTTTGCGCAAGT	[A/G]	2R	39120197		I	0	1
CYP329A1-D-snp2	CCTCCSCCTTMCCSACAGCCGCCCAGCCCTGGGTARATGAGGTGTGAAAGTGCAGCCTTG[C/G]CGCGCTGATGAATGGCCCTGAATGCGGTAA	[G/C]	2R	39120634		I	0	1
AGAMP3_2R_39430878	ACTATCCTTGCGTTGTAGGCAGTGCATTAATCGGAATGAGGCAAATTGCAGCCTTACTCG[T/G]TAAAAGATGGAAAGGAAAATGATTTAAAATAAAACTGAACCAAAAAGCAATATTGAAGGT	[T/G]	2R	39430878			1	0
COE22933-U-snp1	TCCTTTCTGGYCTCCGTTCYCTTTTGCCAYTTGACCACCCGATCGTTTTC[T/C]GGYGAACAGTCGAGAATGTTAAATTTACGATGAAATTCAGAWTAAATAATGCAAAATAMA	[T/C]	2R	39691342		IG	0	0
COE22933-U-snp2	ATAATAAATATTTATTCAAGCTATTGAAATCGGGTGAGTA[A/C]ATATTSTTTAAAAAATCAATGCATTTCATTAACTTACTAGAAACTCCATTGTGCACAATT	[A/C]	2R	39691646			0	0
AGAMP3_2R_39695557	CGCCCTATTCTGGCACCGTTCGACATCATTATTGATTAATTACACACCTGCTTCTGGCAA[T/C]GAACCAGCATTGGGGAGGCTGCTAACAACGGACAGCCGGAAGGATCCTTCCCGCGCGTTA	[A/G]	2R	39695557		IG	0	0
AGAMP3_2R_39696597	CCCGCCGGGACCGCCCATGCCCGGGCCGCCGCCGCGCGGCTCATTCAGCCGCGTCTTGTC[T/C]CGCTGGTAGTACACGCCGGCAAAGATCAGCACGTTCAGTATGAGCAGACTGCACCCGATC	[T/C]	2R	39696597	rs5308171	S	0	0
COE22933-1-snp2	GCCGGATTTGCATAAGCCGGGCAACGACGACGTCCCCAGCGGGCACCACGAGCTGGAGTC[A/G]GACGACGAGGAGCAGCCGGCCGCGCTGCCAACGGTGAAACCGCTCAACCCGCCCCAGCGC	[T/C]	2R	39696984		S	0	0
AGAMP3_2R_39699331	AATGTCAACTGTCGAGTCAACGGGCTCTGTTGGCAGATTTCGTAAGAAGTCAGCGTGCCC[T/G]TTTCCACGCAATATTTGCACAGCATTGGAAAAGGATTATGATTTGCTTTCTTTTTTTACT	[T/G]	2R	39699331		I	0	0
AGAMP3_2R_39704157	GACGCCTTGCCTCGCGCAAAGCTTACGGATTGCGCCCACACGCCCCAAACATAAAAGCTT[A/G]GTGCTCTCGCTCCTTGGCACGATGGTGATGATGGATTTATTCATTCCATTAGCGATCGGG	[T/C]	2R	39704157		IG	0	1
AGAMP3_2R_39705574	CGCTTGCACCCGTGCGTCTAGCGAAAGAGCATCCTTGTTGTTGTGTTGAAAAACACTTGT[A/C]GAAAATGAATTTGGTGTAATCCCCATTGGAGCGTTTTCCACTCTTGGGAACAGTCGTCCC	[T/G]	2R	39705574		IG	0	1
AGAMP3_2R_39707637	TTGTTTTCAAATATTTGTGCCAATCGTGAACGTAAATATGATTGCACTGAGTTTCAATCC[A/G]CGCTGAATTCCATTTTCTTCAAATACGCCAGGTAAAAATTATAGTGCATAAATCAAGCGT	[T/C]	2R	39707637			0	0
COE8543-U-snp3	AAATATTGCCTCTCAGGCAAAAYTCCGTGCCAAAYCAAGGTTAAAATGACACATAAGTGA[T/C]AAAAGCTGTGTACTATTTGACGATAGATTATGAAAATTTTGCATGATTATCATTTCACTG	[A/G]	2R	39713032			0	0
COE8543-U-snp2	TCGTTTACATYGAATTTGTGTAACTGTTTAAATTTGCTTAATTTGTTGAAGAATTTAGTA[T/C]ACTATTATTTTTATCACCAGTGAAATGATAATCATGCAAAATTTTCATAATCTATCGTCA	[A/G]	2R	39713110			0	0
COE8543-snp1	CCAGATGAGAATGTATACCTTGCGTTGGTACGTA[A/G]ATGTTGAGATACAGACAGTCCTCTGATTGATTGCGCAGGTAGGGCAGGAGGCGCCTCAGG	[A/G]	2R	39717514		S	0	1
COE8543-snp2	GGCGGGATGGGTTTATTTTTATCGCTGAARGGGTGCTCGTGCTAACCTGTCTGCCTTTTT[T/C]ACACCGGACCAGAGCGCCCCGGTCACCGGTGGCATGAACCGCAGATTGCCCACCGGGGGC	[A/G]	2R	39717948		S	0	1
COE8543-D-snp1	CCATAGAAAGGGAGCTGCAMAACTCTTCTTCAACATCTAACGACGCACACACCACGGCAC[A/T]CAAACACACTCAAGGGCCTATGAATTCATCATCGCGTTGCAACTTCACATACCAACCAGG	[T/A]	2R	39722590			0	0
AGAMP3_2R_39731306	AAGCGTAGCGAGTGGTAATTGTGATGATGTTTGATTTGATGCATGGTGTTGAACGTGTTT[A/G]AGAAGCGTCAAGTAAGCTAGTACGAGACTAAGTGAACATAGAAGTGAACTAATCCACTCC	[A/G]	2R	39731306		IGU	0	1
COE7913-U-snp2	ACTARCTTRTCAAACATTGAAACACTWGMCACTTCACAAGACAAAAAGTTTTTAAAAGGT[A/T]ATCGMTGTKTCGTAACTCTGACAAAGTAAAAACACAACACTCAAACACCATCACTGTACG	[T/A]	2R	39731442	rs5522954	IGU	0	1
AGAMP3_2R_39735290	AACTATGCTGAGGTCAGGAATTTCGAGGGTGATGTTTTTGTAATGCTTTTTTCGCCGACA[A/G]CATCGTTTGATCGGTGCAGAAGGTTTGAttttttttGGTTGTGAACAGTTTAATGCTGAA	[T/C]	2R	39735290		I	0	0
COE7913-snp1	ACGTGTTTGGCCACAACAGCGAGGCGGGCGAGTACGGTCGGGTAAGTGGTTGAGTGGTGG[T/C]ACTGCRYCGCAAAATCATTTGAATGATGTCTAATTACGCTGTAACCGGGTTGCACGCTGC	[T/C]	2R	39737335	rs5615857	I	0	1
AGAMP3_2R_39740634	GGGTGCGACAGAAATCATGAAAAGTGAATCGACGCTCACCATCCTGATAGCGGTGGCTAT[T/C]GTGTTTCTGCTGTTCAACATCGTCGTCATAGTGGGCTACCTGGTCCGGCGCCATCTCGGT	[T/C]	2R	39740634		IGD	0	0
COE7913-D-snp1	ACCAGAAATTCAAAAWAGATTYGAATTATTTYCAAYCRAAGTTTGTTCGAAATGGGGTTC[A/G]TTYCGCCGAAGCTGTACTTATGAGGTGTATGAAGGAGTTGACCATTTTAAAACGAAATGA	[A/G]	2R	39744701			0	0
AGAMP3_2R_39954840	TCTTAACGATTCCCTGAACTACAGCGTATTCAGATAGTAGGCCCATAATTAACAAACTTC[T/C]AGTGTTCAACATCCAGCGCGTCAATCGATTGGTTGTGTTTCTGCATAAAGCGGGCACACA	[A/G]	2R	39954840			1	0
AGAMP3_2R_40418851	TCAATTGAAAGTGTGAAGATTCACACACGCCTGCGGGGAGTGTTTTTCATGGCCGATGGT[A/T]TTTCGGTGATTTACATGATAGTACACACACTACGACCATCGGGATATGAACATGGAAAGA	[T/A]	2R	40418851		I	1	1
CYP4AA1-U-snp1	GCGGGAAGATGCTGYKCCCGGCACGAAGGTGTCYCAGCTGGTCCCGGGTGGCGGTGGCCG[A/G]CCGACGAACCGGTCCGCTACCGTATCGTGGGATCGCCGYTCKCYCAGGAACAGTTTCGTG	[A/G]	2R	40475860			0	0
CYP4AA1-snp1	TGCGAGCTCCATTTGTGTCCTGAAACACGAAATGCATCGTGATCCATAGTGATCTAGCAG[C/G]CAAAACGAYATAGCAAMACAGTACACCTACCACTGCTGGTGATCAGTCCACGGCCCAGGA	[G/C]	2R	40481907		NS	0	1
CYP4AA1-snp2	AGTACACCTACCACTGCTGGTGATCAGTCCACGGCCCAGGAAGTTGTGCAGCAGCTTGTA[A/G]AACATGGATTTGTTGGTGTGCTTCTTCGAGGACAGGATCACCTTCAGATCGTTCGGATCG	[A/G]	2R	40481987		S	0	0
CYP4AA1-D-snp1	CAGACAATTGCTTCCAMGRGRGTACWCGCGTACGCACGYCAAGCGACGGGATGTAATCGA[A/T]TTTTCGTATGTTGTTGTTTGCTACACTTAGCGCTACCAACAGTTGTTGAGTTTGCCTCCG	[T/A]	2R	40487309		IGU	0	1
CYP4AA1-D-snp3	GGTTGCGGGTGGTGATTATGTTGGACATGGGTGAGCAAAAA[A/G]YGTATCTCACTGTGCAACAATTCTCAGCTTTGTAGCTCCCAATTGAAAGAGCAAACTTGA	[A/G]	2R	40487579		IGU	0	1
AGAMP3_2R_40882487	GAACCGCGACACGTTCGAGTTTAACTTCCTGTGGAACGATGAGTACTACCGCCCGGGCGG[C/G]CCGCTGTTTATCGTCGTCGGAGGCCATCACCGTACCAATCCGTTCTTCATCGACGAAACG	[C/G]	2R	40882487			1	0
AGAMP3_2R_40907778	GGAGCTGGACAGACGCTGCCCGGTGCTGCGAATGTGTCGGAGGCGTCGGGTGCATCGGAC[C/G]CGGGTGGCAGCAATGCAACAGCCGAGGATGGGAACGAAAAGACGGGAACCGATGGTCAGG	[C/G]	2R	40907778		NS	1	0
AGAMP3_2R_40971847	AGATGATTGCACAATTTCAACTTCGATAGCGTAGTGTTCTCCACTACACGCGTTTCTACG[A/T]TTGAATTACCTTTCTCTGTAAAATCTTTAGAACTTGAGAACTCGACACATACTCGCGCAC	[T/A]	2R	40971847		IG	1	1
AGAMP3_2R_41470054	AGGACACGAAACGCTAATGCGAAATTCTTTGCTCGAAAAGAAAAAAGACCAGCATTTTCT[T/C]TAATGAAGAACCGCTTTTGAGGGTTAAGTTGAAGCGCACCAAGCGCCTAATACTAATTCG	[A/G]	2R	41470054			1	0
AGAMP3_2R_41983528	AACGGTACCGACAAGCGCGGGGTACAATTACATGCACATTCACGTACGCTGAATTACACC[C/G]AATTCGCTTTTCCATGATAAATCACCGAAAAAATCCACCCCATCCCCCACCCAGCCAAAA	[G/C]	2R	41983528		IG	1	0
BOLA-162-rs5500154	CTAACAAGGTGCAAAGATTTATTTCCCGAATCCTCCCTTACAGTTTGGGCT[A/T]GGTTCGAGCTTGTACGCTTCATCCCACTGCTGAGGTGTCTTGGCCACTAT	[A/T]	2R	42207180	rs5500154	S	1	0
AGAMP3_2R_42363362	CGATTCGAGTACCGTTCGAACACCTCCAAACCGCGAGCGCTTATGGACCGAAAAGCAACA[A/C]CGAACCCaaaaaaaaaGCAACCAACCCAGCATGCCATAAGAGCCACTCCACAGCGACAAG	[A/C]	2R	42363362			0	0
PX14-D-snp2	TGGGAATCATTGACGTACAGAGAATGACATTTTTGTAAACTTTGATTTATCAAATTTTTC[A/C]RTTATAAACTAGTCTTTTGATGTTGATATAGGCGAAAGAACTCAGTTGAAGCCAGTCTGG	[A/C]	2R	42373694		IGD	0	0
PX14-D-snp1	ATSCTAGGTGGATTGTATCAGTGTTCAGTGTTAAAGGAACTGATGCGACCGTTTATTAGG[A/G]TAGCGGGTCGATTGCTTACTTATCCGGTGCTACAACCGCTTTGCGGTCTTGGCTTACCTC	[T/C]	2R	42373984		IGU	0	1
AGAMP3_2R_42966385	TTCGATCGTAAAAGGAGCACACGCgtgtgtgtgtgtgtgACTGTATCGGCATGCTACCTC[A/G]CCATTTAACTTCTCGCGTTATTGGCGTTCTCTTTTTTTAATTATTTTGGGGGAAAGTGAA	[A/G]	2R	42966385		IG	1	1
AGAMP3_2R_43463828	GGTACATGAAGGTTTTACCCGGCTAGATGTGTCATGGTCAGTGTCCCCATGACCAGCACT[A/G]CATGTGGTTAATTAAAACTCCAATTGAATCTTAATTAAAGTAGACAAAACTATTAACAAA	[A/G]	2R	43463828		IG	1	0
AGAMP3_2R_43835522	aacaacacgtaaaaacaacaacaaaaaattaaaacagacacatgaaacatacacaGAGAT[A/G]GGCAAGCACACGGTGGATCAGTGTGCGAACATTAATTACACCCATAAGGCAGCATTCCTC	[T/C]	2R	43835522		IG	1	1
FERRED-U-snp3	CTACAAGACGGTCACGGCGTTTGCTACCGCGGAAGAGTACGATCTCGATCGGCTGCTGAG[A/G]GCACTGCGCGAACAAAATCTGTAYGAACCGAAGCAGTTCCTGTCCAGCGATAATATCGAC	[A/G]	2R	45768846		S	1	1
FERRED-snp1	ATTCGACTCTAAATACTGGTCGGTRTTGATCGATCCGTTRCGATTCAGGCTGATGCCCGA[A/G]CCCTGCAGGAACTCCGTGTACAGCGTCGAACCGATGCCAAAAATGCAAATATCCGCATCG	[A/G]	2R	45773390		S	1	1
FERRED-D-snp4	AAAARAGGCRGAACCAAGTTARAATGAAACWCTGCCACCGGACCGGTCTAGTGGTACCTT[T/C]CCCTTACCTTGGCATTATTAACAATGGTGTAGATTTTATGCTGCTGATGCTGAACGATAA	[T/C]	2R	45778363		I	1	1
hsp60-474	CATGCCCTCGATYACCTCCAGCTCGTCGTTCAGCGTCTTRCCGTCCTTCACCGTAATCAC[A/G]CCCTCCTTGCCGACGCGCTTCATTGCCTCGCTGATCAGATCGCCGATCGCGCGGTCACCG	[T/C]	2R	47809214	rs5443711	S	1	1
AGAMP3_2R_47876436	CTCTACCGGTCGGCTATATCCGAAGTATCTCAGCTCGTTCGCAAACAGATAAGCGCCCTC[A/G]AGATACGCAATATCGTAAAACAGTCCTTCGGTGATCCATCGCGTCTGGATCGGCTCGGCG	[A/G]	2R	47876436		S	1	0
PX10-U-alt-snpa	TAGGACAGACAATTCATTTTCTTCGAAAMGTTGAGCRTTTCAGCGTAAAGTGACAAGCTT[A/G]GTTRAAACACRCATTTTAACCAAAGTATTCTGCATGTTCGTTTCAGCAATGATAACGCGG	[A/G]	2R	48256404		IGD	0	0
AGAMP3_2R_48258111	TTCCCCGAAATGCTCTCCACCAAAACCTTCCTCAATTAAAGAACCAAACCAACACCTTTT[A/G]AGCGGGAGTTTGTGTGCGTGTTCAGCGATGCGTGATTTTTTCTTCATCCCGGCACCACAC	[T/C]	2R	48258111		IGD	0	1
AGAMP3_2R_48263804	TTTCCTAGAAGTCTTACCCAAAAACTATAGTCTGAATTGAACAAAATACAACTTTCATTG[T/C]ACAAAGTTCATTGTCAGCCAACTACCATCTTCGATTCAATCAAACAATCGTTCTGCTATT	[A/G]	2R	48263804		I	0	1
PX11-snp2	GAAGCTAGTGAGYCGCTCCAGGCCGGCCCAGCTCCGGTAGTCGTTGTACGGGCGCAGCGC[A/G]TGATCCCGGCCGCGCTGTATGTTGAGYGACGCSAGATCCGAACCGAACGGGTTGCGGCCC	[T/C]	2R	48268166	rs5034085		0	0
PX11-alt1-snp1	CGTTTCGCCAAACAGTGCYCCATCCTGCGTCGGGGGYTCCAGCAGTCCGCCCACCCACAG[A/G]TCCACATCRTCCGGGAACTCGTACACGCTGGCGAGCCGGGCACCGACYGGACCGAACTGC	[A/G]	2R	48268289	rs5531032		0	0
AGAMP3_2R_49760271	CAGCACGTTCACCTTCGTCTGCAAATCTTCGCCCACGGCGGCCACGAGCAGATTTTTCAG[T/C]TCCGCATTCACCTGCGCCTGGAACTTCAGCTGGCCCTGGAAGTAGTCGCGCTCCTTGCGC	[A/G]	2R	49760271		IGD	1	0
DNMT-119	ATGCCGCTGGTAAAGTTCATACTGATGGAAAACGTGAAAGGGTTTGAAAA[T/C]TCACAAGCCTGTGAGATGTACAAAGCGCGCCTGCGGGAGGCAGGTTTYCAC	[T/C]	2R	49762675		S	1	1
DNMT-167	AAYTCACAAGCCTGTGAGATGTACAAAGCGCGCCTGCGGGAGGCAGGTTT[T/C]CACTAYCAGCAGTACATACTATCGCCGCACCAGTTTGGCGTGCCCAACAC	[T/C]	2R	49762723			1	0
AGAMP3_2R_50349783	TTTATTCGTCAAAAATCAAGCCTCGTCAAGCATATTGTATGGCTGTGCATTATGGAGTTT[A/T]AATTTGGTAATGTGGTAAGGTGTATTATTCAAAGTTTATTTTTTACAAGACATCAAATTG	[T/A]	2R	50349783		IGUD	1	1
GPRnpy2-snp1	AGTTTATCCGACTCGCGACAGTCTACAGCTGATGGGKGCAATCGCTATCTTGACCGGTAT[T/C]TGGATCATCTCCATAGTRCTAGCTTCGCCGATGTTTATCATCCGGCAACTAATCCACTAC	[T/C]	2R	50353542			1	0
GPRnpy2-snp2	GTACTGCATCGAGGAYTGGCCGATTGCRTACGGCCGTGTGTACTATTCGGCGTTCACTCT[T/C]TGCGTGCAGTACGTGCTACCCATTCTGATCGTGTCGATGGCATACCTGCGCATCTATCTG	[A/G]	2R	50353701	rs3330930	S	1	1
AGAMP3_2R_50988088	TTTTTCGGAAAATTTAATTAGACAACATTCTGTACCACCACCAACGAAACGAAATGCTTA[C/G]GAATGAAGAAAATATATTTATTGAGCGTATTGACATACATGCATGCTGACTTAGTAGGTA	[C/G]	2R	50988088		IGD	0	0
AGAMP3_2R_50989428	AGGGAATGTGCGATAACACCTCCACAGGTAGGATCGAAAGTAGGTTCTTTGAATGGCAGA[T/G]ATTGTCACGGTATCCTTTTGCTATCCTCGACGGgtgtgtgtgtgtgtgtgtgtggtgtgt	[A/C]	2R	50989428		IGD	0	1
AGAMP3_2R_50992201	CAATAAACACACACGCATTGgaaaattgggaaaaatccaaaagaaaaaaaaTAACGCGTT[T/C]CTCCAACATAACCGGGAACACCGTGGCTTGCAATTGAGAATGATAAGAAAAACACATCAC	[A/G]	2R	50992201		I	0	0
GSTd7-snp3	CTTGGCCAGCAGCAGCACCGATCGGCACGGTGGCGATGGSGGCAGATAATACAGCACTGG[A/C]GTCATTGGGCCGCGCCTGCAAATCAAAACAAAAAACGCAACGAAACGATCAAAATGCAGC	[T/G]	2R	50992570	rs5252956	S	0	1
GSTd7-snp2	ACCGCTCTTAGTGTCATTTGTGTTACGCTTTATCCCGGCGGCTTGGCTGTTTCCATTTTT[T/G]GCGTGAAGCATAATTAGAACGATACGCGAGCTCGGGTGTGATGTGCTGCATTTTGATCGT	[T/G]	2R	50992680	rs5252515	I	0	1
GSTd7-snp1	TSGGAAATGTTAATTGGGTGATTAGCCGGGTGCGTGCTAGCCGAAGCGAACAGGCACCCG[T/C]GCGTTATGCTTTCAGGCGGTACTATTATTGTGGTCATTAATTTAATCCTTTTCCTAGCTG	[T/C]	2R	50992808		I	0	1
GSTd7-D-snp2	AAAATAATAGGAACTCTGCTCAAACTGTTGCGTGACTTTTGTACCGCACCGTAAACCAAC[A/T]TTGAAGTGGTGCAATTAGTTAAGCGTATTTCTGTTTGTTTCGTGCTCTGTTCAACGCCGC	[T/A]	2R	50995268		IGUD	0	1
AGAMP3_2R_50998892	GATGATCCAACCATTGCGGATTTCAGCATTTTGGCCTGCATTTTGGATTGCAACGTTCGA[A/C]GCTGCCGGGTACGATCTGCGGCGATATGAAAACATCCACCGATGGTACGAGCAGACCGGC	[T/G]	2R	50998892		NS	0	0
GSTd1-D-snp2	ACATTATTTTAATAAGCTAAAATATAGGCATAAGCATTCTGTAATTCACAATTGTATGAC[C/G]AACGTTCATTTGATTTGAAAGGAATTTAACGAAATAACTCATATTCGTGCTTTAACACAA	[C/G]	2R	51002414	rs3317069	IGUD	0	0
GSTd2-snp2	RTGAACCGTCGACCAGCGTGGGGATCGTACGCTGAGGGTTAAGCTTGGTAAACTGCGGTG[A/T]TCGATGAGCACCAGCCATGAGATCGAGATACTTAAGGTTTAGCTTCACGTGAACTGCTTC	[A/T]	2R	51003741		NS	0	1
AGAMP3_2R_51009644	GGCAGCATCGGCACCGACCCAAAACTCGTACGGTGCGCCAATAAATTCGATGTCCTCAAT[A/C]GATTGACAAACGATATCGATCGTAACGAGTGCCACGTTGAACCGCGACTCTGAGGGATTC	[A/C]	2R	51009644		S	0	1
GSTd8-U-snp1	TGCGAACCGRGCGGMCCTARACCATCATCYAGCTGCAGCAGCATTCCTTCACACAACACG[A/T]TGGGAGGAAAAACCAATCAATAATCCACCGAACCGAAAGCTCATTGGCCGGGAAWCGGGT	[T/A]	2R	51210491	rs3315178	IGUD	0	1
AGAMP3_2R_51215293	GGCATATGCAGTAGCTGGAGGTGTGGGACCAGACTCGAAGTAAGCCCGGTACTGCTGCAT[A/T]CCACTCTCGTTAATCTCCTGAAAGTCCGCCATGGTTGCCTTGCAGCCCTCGTACCACGCC	[A/T]	2R	51215293		S	0	1
GSTd8-snp1	GGCGTACGGATTATTGATAAGATATCCATTCAGCACTGCCAGTGCTTCTTCCAACTTTTC[A/G]AGCKTCTCGCCGCCGGGCGTGGCACCCTCAAAGTATAACGGATAGTAGTAATCCTCCAAC	[A/G]	2R	51215512			0	0
GSTd8-snp2	GTATCCGAAGGATGCCAAGACACGGGCCATCATWAATCAGCGATTGTTCTTCGATCACGG[T/C]ACGCTTGGTACTCGGTTGGAGGATTACTACTATCCGTTATACTTTGAGGGTGCCACGCCC	[A/G]	2R	51215587		S	0	1
GSTd8-snp3	AAAAATGATGAAATGGTTSATTGCKAGCAYTCACTCACRGTTTACACAGCTCGTAGTTTG[T/C]TCCACTTACCACAGTAAACGTGGGTCGCAGYTGTTCATCCTTCATTARATCAACGAATT	[A/G]	2R	51215825	rs3315841	I	0	1
GSTd9-snp1	CACCGCCGAACAGCGGCATATGGCG[A/C]GAGCTCAAACTTYAGCACCACCAGCATGGAAACGGTGCACACGAGCGAATAGTCCGCCAC	[A/C]	2R	51216350	rs3315860		0	0
GSTd9-snp2	CGGTGCGTACTGCTCTGCCAGGTAGATCAGAATGGCGCCTGGCTCGCAGATGGCCACACC[A/G]TCGACGACCAGCGTCGGTACCGTGTGCTGTGGGTTGATCTTCTTGAACGCYGGGTTCACA	[T/C]	2R	51216699		S	0	1
AGAMP3_2R_51216912	GATGTTGTAATACAGATCCATGCGTCGTAGGAAGATAAAACCGAACCCACAGAAACCTCG[T/C]ACGCCTTATTTATAGGGCAATGGTGGCCAACTAGCGGGCGGATGATGGATTATTGCTGGG	[T/C]	2R	51216912		IGU	0	1
AGAMP3_2R_51217441	TCACTCAACCACTAGAAAACTGCTCAACAAGCGCGAGATAGAATGTACGCCGGGGACGCC[A/T]CTTCACATTGATGAGTTCACAGTCACCAAGATAGGTCCCGGTTTTTATGTTAAATTTTGT	[T/A]	2R	51217441		IGU	0	1
AGAMP3_2R_51218022	GGCCAAGATGATGCCCTCTATCCAAAAGATCCCAAAGTGCGATCCATTGTAAATCAGCGT[T/C]TGTTTTTTGATATCGGAACGCTGTACAAAAACATTCTAGCCAACATTGACGTCCTGATCG	[T/C]	2R	51218022		S	0	1
GSTd5-D-snp2	CGATGCCACRGAACAGCTCATACAGTCGTACAAGAAGCATCCGGTCCTGTACGATATGCG[T/C]CATCCGCGCTACTACAACAAGACCTTCCGCGGCAAGGCGCTGTCGGAAATCGTGGACGAY	[A/G]	2R	51223830	rs5307163		0	0
6PGD-U-snp1	TTTTATCGGATCGGAGGGTACGCTCGGCATCATCACCCGRCTGTCCATGTTCTGTCCCAC[T/C]GCTTCTCGTTCCGTCAACGTCGCCTTTCTGGGGCTGCACAGCTACGACGATGTAAAGCGC	[A/G]	2R	51671616		S	0	1
6PGD-U-snp2	CAARCGTGGCCTMGGCGAGGTTCTCTCSTCGTGCGAAATGATCGATGCTGCATCGTTGGA[T/C]AGTTGTACACGATTTTTCGGACTACAGTAAGAACTAAAMTGAACCGGCAGGATGTTGAAA	[T/C]	2R	51671751		S	0	1
AGAMP3_2R_51677289	CGCCGTCCACTTGCCCGTGCCCTTCTGGCCGGCCGTGTCACGGATACGCTCCAGCAAGTA[T/G]CCCTCATCGTCGCGATAGTTCAGAATGTCCCGGGTGATCTCGATCAAGAACGAGTCCAGC	[T/G]	2R	51677289		S	0	1
AGAMP3_2R_53205604	CGTGTACTTATATTTGTAGTTTCTATTTCACAAAATGGCCAGCTCCAAATAATCTTCTAA[A/T]TTCATATAGATTGAAATGTTTGACCCGATAGTCATGATGACATTATGGTCTGTAAGTAAC	[A/T]	2R	53205604		IGU	0	1
GPX2-1-snp1	ACACACGYACATAAAACTAATACGCAGTAGATGTAYGGAACTGTTAGTACTAAGGTAATC[A/G]TTTTATCGACCGAACGCAAGGACAAACGCAGTACYAACCTTATGTACACACAGAGCAARC	[T/C]	2R	53208266	rs3328512	I	0	1
GPX1-snp1	TGAAGCCCMTCCACCGTTTGGTGGGCAGTGTTCTTGGGGTGGAGAGATTTTCTCACAGCG[A/C]TCGTTTCACGCATCCTTATGTGCGGATAGATGCGATTTTGYTGTCRCCATACTATCATCA	[T/G]	2R	53210901	rs3328622	I	0	1
GPX1-D-snp2	YATTGAGGCGGCCGCCGCCCAATCTAAAAARACGGCAGCATCTACTAGCAAGGCTTCGGA[T/C]GCTGAGTTTATCGAACCTCAGCAACCCAATGCACCWAGCGAAAGGCCTTACTTCACGCAG	[T/C]	2R	53216207		IGD	0	1
GSTd11-U-snp2	CATCACCGCACCGGGATATCCCTCGTCACCGTCGGGRGATGTGTGGGTAAGCGTTACAGC[A/C]GTCCCATCCACGAACGCCTCCCAGTTGTACTTGTCGAAYCCAATCTTTCCGCCGTGCAGC	[T/G]	2R	55498591	rs5647141		0	0
AGAMP3_2R_55500691	GCAGTCGCCTTCGATGTAGATGGATCCCGTTTCTACGTTTACGATGGTTTCGTCCGGCAT[T/C]ACCATTAACCGAGGTATCGCCATTTTCGTGAGCCGATCGCGCAGATCGTTCATGAACATT	[T/C]	2R	55500691		S	0	0
AGAMP3_2R_55500823	GTGCTCCTGGCAGACCACCTTATTGGACACCTTGTCCACCGGAAGGTCTACAAACTCGAG[A/G]CGGTCCGCGTTTTTCGCCCATTCTATCAATCGTTCTTGATCGCGCACGGGATACCGAAAG	[T/C]	2R	55500823			0	0
GSTd11-D-snp1	TCTCTCTCTCKCGCGTTTGCGACTCGTACGTACCTTCAGGAACTCCGGTTTAAGRTGTTC[A/G]CCTTCAACAGGTCGACCTCCT	[T/C]	2R	55502064			0	0
GSTd6-snp1	CCAGCACTACATTCCCACGCTGGTCGACGCCGATGGTGACGTGGTGGTGTGGGAATCGAG[T/C]GCCATCCTGATCTATCTGGCCGAACGGTACGGTGCAGCAGACGACGATACGCTCTACCCG	[T/C]	2R	55503410	rs5283578	S	0	1
GSTd6-snp2	GCTGGACAGCTTTCTGAGCGCGAGCCGCTGGACGGCGGGCGATCACATAACGGTGGCGGA[T/C]TTCGCGATCGCTGTGACGGTRGCCGCCCTGGACGGATTGCTCAACTTTGACTTTAGCGTG	[A/G]	2R	55503683	rs3597792	S	0	1
gstd3-snp1	AGYCGACGTGCTGGAAAGCTTCCTTWMCGAACGATCGTACRCGGCCGCAGATCAGCTGAC[A/G]GTGGCGGACATTTGTTTGCTAGTTACGGTCAATGCGCTCACGCTTTGGTTGGGCTACGAG	[A/G]	2R	55505942		S	0	1
gstd3-snp3	TGCTTCTCGCTGGGCTGACTGTTCCGCATTTGAACGTGCACGTTTTCGTAGATCTGTTTG[A/T]ACAGTGTGCCAACGTCGAAGAAGAGCCGCTGATTCACAACGCACCGCACTAGCGCATCCT	[A/T]	2R	55506084		NS	0	1
GSTd3-snp5	CGAAGAAGCTGGGCATAAAGCTAAA[T/C]CTCAGGAAAATGAACATATACGATCCCGTTGMAATGGATACCCTGTCSAAGGTATTATTG	[T/C]	2R	55506378		S	0	1
GSTd12d3-snp3	GACGTATCTGGTGGAGGTGTACGGCAAGGATGACACGCTYTACCCGAAGGACCCGAAGGT[A/G]CGGTCCGTCGTGAACCAGCGGCTYTTCTTCGACATTGGCACGCTGTACAAGCAAATCATC	[A/G]	2R	55509735	rs5595831	S	0	0
GSTd12d3-snp2	ACGTGATGCATTGACTAAGGTAAGCTGGAAGCTGGAAGCTGGATGACTGAAGAGGGACAT[T/G]TTCGTGCTAATCKGCTCCTGTTTGTAGCTTAATCCGCAACATACMATYCCCACGCTGGTG	[T/G]	2R	55509894			0	0
GSTd12d3-snp1	CAGAGCGCAATCCTGGTTGCCAAGAAGCTGGGCATTACGCTGAACCTGAAGAAGACGAAC[A/G]TRCACGATCCGGTTGAACGTGATGCATTGACTAAGGTAAGCTGGAAGCTGGAAGCTGGAT	[A/G]	2R	55509971	rs3598270	NS	0	0
GSTd12-d3-D-snp1	TTAAATAAATACCTTGAACTCAGCAAAATATCCATTAGTTCGGTATTTATACACGGTACA[T/C]CATTGATCGTTTATAACACGTGTGGGCTAGTCTTGTGGTACCGCTGTTAAATCAATCGAC	[A/G]	2R	55511866	rs3598327	IGUD	0	0
GSTd12-d3-D-snp2	GTCAAATAAGATGAKTTGTYAAATTAGACAGCTTGAAAGTAAAGGAAACGTATATACGGG[T/C]TAAGAAAGCAGATATAACATTTAGTATGCAAATCTTGATTGTTGCATAGACTATGATAGT	[T/C]	2R	55512061	rs3599112		0	0
GSTd10-snp2	CCCGCGYGATCCGAAGGTWCGGTCCGTCGTGAACCAACGGCTGTTCTTCGACAATGGCCT[A/T]ATGTTCAAGAGTGCCATCGAGTACGTGGAGTGTATTTTGAAGAAAAAGCTCGAACCAACG	[T/A]	2R	55513410	rs5040984	S	0	1
GSTd10-D-snp2	GCCGGCTGGAGAAAGCATACCAAAAGCAGCATGAAAATAGCGCGCGAAGCACATAACAAA[T/G]AGAAACATATTTAGCGTAGCGTAAGTACTGTAATGACACCGTTCAATATACAATTTATTT	[T/G]	2R	55518455		IGU	0	1
RPL19-U-snp2	CTGATTGATTATGAATGTTTTCAACACCTAAACTGAACACTACCTTCGCCGCAGGCTATT[T/C]YACCAATTGTRTACTTTATCCTGAAAAATATTCAATTATKTCTTTVTCACACTCTCGTTC	[T/C]	2R	55865330	rs3594704		1	0
RPL19-snp1	TCAGACCATCCTTGATCAGTTTGCGAATGTTTTGTCCTGCAAGCAAAAATAGAATAGAGC[A/G]TCGTATCAAAGTCTGTGCGAAGCAGGTGCCATATGTGGTGGGCTGCTAAAGCATATCGCT	[T/C]	2R	55870125		I	1	1
GABA-B-2-1c	TCTGTCCGGTCTTCTGAAGCCGGAGCTTGAGATTAGCATAGGCCAGCAATTGTTGATCCG[A/G]TCGCTTATTAATATCCTATTTCAAAAGCATCCTCTCCCAGGATCTGGATTCCTGTGTCGC	[A/G]	2R	58235155		I	1	1
def2-303	ACTTTTTGCTAAAACCAATCATTAATAAAGATTGATTAAAAGCTGCTTACAT[C/G]GGTCGTACCTTTTTCTTTACTTTTCTCAACGGGAATATCACGCACTA	[G/C]	2R	58677311	rs5157807	IGD	1	1
HOXSEX-453	GATTTAAGTACAGCCAGTGGAGGAAGCAGTGGAGCCAATGATGGAAATA[A/G]TGGTAGGCCTGAGATTTCGCCAAAACTGTCCCCAGGATCAGTAGTTGAAA	[T/C]	2R	59757178		NS	1	1
ANTENN-65	GCTAACGGAGCTAAGTTGTCTGGTCAAATAATCGTTACTGTCATATTCAC[T/C]TGCAAATTTCTCAATCAGTCAGATCAATCCAAAGACAAAAGCTAAACATT	[A/G]	2R	59842039		5UTR	1	1
AGAMP3_2R_60684424	atttagttttttATGTGACGAGCGACGCCAGCACGATAACAGATACACAGACTGCACGGT[A/T]ATGATAACCGTACGCAAAACCTTAGCCCGATTGGGATAAATGTTTGTCACCGTTTCGGGG	[A/T]	2R	60684424		IGU	0	0
AGAMP3_2R_60685460	TTCGTCCAATATGGCCTTCCCGCCAAACCTACAAGCCCTCCTAGTCCCTATACCCATTTT[A/G]AAATAAACACAGCACGATCGTTACACAACCCCACGAACACAACACAGAAAATTGTGGTTA	[A/G]	2R	60685460		IGU	0	1
CYP306A1-3-snp1	CGACAAGAAGCAGGTCGACCGGATGCTGCATTTTGCGATGACATACAGCTACGCCATTTG[A/T]TGGCAGACTTGTTCGGGGCAGGTGTGGATACTACATTTACTACGATTCGATGGGCTTTGC	[T/A]	2R	60705260		NS	0	0
AGAMP3_2R_60705841	TGTGTTTGGGCGAAGAGCTTGCTAGAAATATTCTTCATTTGTACATCGCCAATATAGTGT[A/C]TCATTACGATTGGATTCGGATATCTCCTGAGGATGCTATGTTGATTGATTTAACAGGAAA	[A/C]	2R	60705841		NS	0	1
AGAMP3_2R_60707344	CAGTTTTGAGTTGATGAAGCATAAATTGGTATCATATATGTCGATCGAGTAGGCAGATTC[A/G]AGTGATTTTCTCCCGACAGCCCTAGCTGTCGGAAACACGCAAATTCAACCATTTAATTAA	[T/C]	2R	60707344		IGD	0	1
AGAMP3_2L_1267819	AAAAGATAAATCGGCCTGGTTATTGCAAGAAAAATGTTAATTGGTTCATACATTTTACAG[T/G]ACGAGTATGTTTGCCTGTAGTAACAGTAAATGTTTGAGAGAATCATGAATTTTCAAGGGC	[A/C]	2L	1267819		IGD	1	1
AGAMP3_2L_1277698	aatcatgtaaTTCGCCTGAATGTGTGAAATCCGCTTGGACGCAAATCTTGAAATTGCATG[T/C]AAAATTATTGAAAATCTCGCCTCAGTGGtaaaaaaaagaataaaataaaagaaaTTTAAA	[T/C]	2L	1277698		I	1	1
AGAMP3_2L_1288183	GAAGTAAATCCCATTATTAACCGGTTCAGGGATGTTTTTCAACAGCTGTTTCATATTATA[T/C]TTTCAGTACATCTAAGTCTAGATTATGGTTTTGCACGACAGTGCGTTACTAGTGTTTACG	[T/C]	2L	1288183		I	1	0
Lim-snp1	TAATTTTGAAACTTTGGCTATTTGSTTTGGTAATAAATGTTCCCGCAACATTTTCGGTTG[C/G]GATAATACAAATGATAATTAAATTTAAACGATATCAAATTAAAGGGGACGAATGCAGTTT	[G/C]	2L	1289890		I	1	1
Lim-snp2	ATGTTTTGGTAGCAAATAGACATCATAC[A/C]AATCGATTAAATTCTCATTCAATTTGTCCGAGTAATAATTTTGAAACTTTGGCTATTTGS	[T/G]	2L	1289986		I	1	1
AGAMP3_2L_1311181	TGAGAAGCATATTTGCTTCTTAACTTTTAGGACTCCCTTTTTTTGGGGCTCCAAGTAGCC[T/G]CATAGGACATTGCTAAATCGAATGTGCTGTCAGCAGCTATGCCCATTATTTGGATGAATT	[T/G]	2L	1311181		IG	1	0
AGAMP3_2L_1521454	tttttacaaaacgaatatAAGCCCAATCTGATAACCGCTTTCCATCTACGAAAATGAGTA[A/T]TGTATATTTGCTCCAGCTGTAGGTGTATTGTTGATTCAAAGCTTCAAAGACCAACTCAAG	[A/T]	2L	1521454		IG	1	1
AGAMP3_2L_1536959	TTTACTTTTTTCATTCCAAGTGGAGAGATTGCAGCTGCTTGCGATGCTGTGTTAGATCAC[A/T]GCACTCGCTCAATGTTGCACTACATCAAGGATTTCCGTGTTTATGATTCGCAGATCCAGT	[T/A]	2L	1536959		IG	1	0
AGAMP3_2L_1553768	ACGAACGTTGCAAAAGGGCAATGCCCGGTGCGAAGCTGACCTACTAAGAAGACACTGTCA[A/T]TGCCGTCGCGTTTTTTAGTCGAGTTGCTGCTGTTGATTGCAAAGCCACGTTGCTCGTGTG	[T/A]	2L	1553768		IG	1	0
AGAMP3_2L_1553924	TGATAGTTTCTTTTCTATCCTCTCTTCGGATCTGTGGATTTTACAAAGCACTGATCGAGA[A/G]TAAGAGTATGTAGCTGTAAAAGTACATAATGTTTTAGTAATATTTGAACTTGCAATTTAC	[A/G]	2L	1553924		IG	1	1
AGAMP3_2L_1573419	GTTCATTGCCATAGTTGTTAACACAACGCGTTCATCCTAATAAATTTCACTGAATGCACT[A/T]AATAACCTAATATCAACGATTCCTTTGAATTTGTTGATACTTCTTTGTCTACCGACAACT	[T/A]	2L	1573419		IG	1	1
AGAMP3_2L_1573499	TTCCTTTGAATTTGTTGATACTTCTTTGTCTACCGACAACTTCGCACTCCAAACCATCTA[T/G]AACGATTAAACAGTGTATTGATTGTATTAGAATTCCACATTAAACTATTTATTTTTTCCA	[T/G]	2L	1573499		IG	1	1
AGAMP3_2L_1974026	CTTCAAATAAGTGAAGTGAAGGGAATTAAAAATTTCTCAAACGCCTTTTTGTTACTAGTG[A/T]TCGAAACCTATCTTGATGTCCTCGGCCGATGCAGAAGATACGGACGAAGAGCTCGATGCG	[A/T]	2L	1974026		5UTR	1	1
AGAMP3_2L_1975623	TTAAAGAAAACACGTCATTGCAACATTCTACTATTTATGGGTTGTGTTAGTAAACCATCT[T/C]TAGCGATTGTGACGCAATGGTGTGAAGGTAGCAGTTTGTATAAACATATTCACGTTAACG	[A/G]	2L	1975623		S	1	1
AGAMP3_2L_1997725	CTACTCGAAACCTTGCTATGTATAAAGGGGTATGAAAAAAATGTCCCAACTAAAAAGCTC[A/T]TCTTCAATAGATGGAATCTAAGTGTGTTCAGACTGTAGTTTAAACAGTTTTAATTAAAAA	[T/A]	2L	1997725		IG	1	1
Ex1-167	ACAGCGAGAATTGGAAAGAAAACGAGCTGAGGGGGAGGTAAATACTTTTTTTGCATTATG[T/C]ACTTATACTGTTATGCTTTGAAACCGCTTCAAGCTATCCTTCATTCATTTCCTTGACCTA	[A/G]	2L	2358328		I	0	1
Ex1-280	TTGACCTAAAATCAACTATCATATTAGTCATTACGTGTTGCTCCACTATTTGCAATTCTA[A/T]TGTCGATACTATTGCTTTTAGGAACTMTATACTTCCTTTAAAATTGTATTAATAATGAAA	[A/T]	2L	2358441		I	0	1
Ex1-420	ATATTTGTATTGTGTTGTTCTTTCGTTTTTCTTTTCGCGCCATTTATAGTACTTTTGATT[A/T]ACACTCTCTGAAATATGTTGTTTATAACGTTCCATGAACGGGATTGATTTGATTTTGCAA	[A/T]	2L	2358581		I	0	1
Ex1-645	GTGAATGTTTTAAGTTGTAAACGGGTAGTATGTTGATAAAGTTTTTTTTTCAATTTACGT[A/T]TSATAATGCTTTAAAATTTAAACAATGTTCTTACGGAAGCACATGTAAAATATATCGTTT	[T/A]	2L	2358806		I	0	0
Ex1-774	ACCAGATAATGCAATGTACATTCACAATGAACATATGATCAAAGAACTGAAGTAACACTT[A/G]ATTGCAATTCAATTTACGAATTTAAATTTCGACATTTGAACAATATCAATGAACAACAAC	[T/C]	2L	2358935		I	0	1
Ex1-954	TGGTCAAAATTGGCATGGGAGAACATTTTTGGAAATAATTTCACAATATATATAGYACAA[A/G]GATGGTGATAATATTCGTGTTTATCTTGCAAAATTTGTGTAAATGTTGCTCTTTG	[T/C]	2L	2359115	rs3268608		0	0
Ex1-1080	ATAAATACACATTTAATAAGTTAATGATTTATTTTTGAGGATTGGTGGAGCACAACCCAT[T/G]CGATAAAATCATCCTGATAGCAATATTTAGCTGATTGTAATTCATTTTATCATGCTGCGA	[T/G]	2L	2359241		I	0	1
Ex1-1166	TTTAGCTGATTGTAATTCATTTTATCATGCTGCGATCTATAGAAGAAAGTCCCTTCATAT[A/G]CATTGAAAAGTTGCTTATGGGCTTGTTCAGCACAATGAAAACATTACGTTGAAAATGTGA	[T/C]	2L	2359327		I	0	0
Ex1-1223	TATACATTGAAAAGTTGCTTATGGGCTTGTTCAGCACAATGAAAACATTACGTTGAAAAT[C/G]TGAAAATTGGCTCAATGGAATCACGCTAAAAATATATCCAATAATCAAAAACTATAGAAT	[G/C]	2L	2359384		I	0	1
Ex1-1319	ATCCAATAATCAAAAACTATAGAATTCAAATGAATTACACGGCATATAAATATATGGTGC[T/C]CCATMTAAAGTGCCCAGTTTCTTCTGTTGAAGTGCACGAACACGTCAGCAATTATCGCAA	[T/C]	2L	2359480		I	0	1
Ex1-1381	CATATAAAGTGCCCAGTTTCTTCTGTTGAAGTGCACGAACACGTCAGCAATTATCGCAAA[A/T]AACATTAACTTCATTATCACTGCAAATGCGCTATCTTAAAGAATGTAGAGGTTTAATGAT	[A/T]	2L	2359542		I	0	1
Ex7-256	AATGACAGTAAGTTATAATTTCATTAAATTATTGTAGATTCCTTTCGCTATCTGAAGCAG[A/T]CTACTAATAAMAAGTTAAATATTTTGCAGCAAATTGGTTCTATTCCGAGAGTGGCGACAT	[T/A]	2L	2390395		I	0	1
Ex7-357	TATTCCGAGAGTGGCGACATTCCTCTTTGTGGAAACTCATCTGGAGCTGGGTGAGTTATG[A/C]TGGACTTAAATCTATTCATTTTACTTTCACTTCTCACATTTTTTAGAAATATGAAGTTGT	[A/C]	2L	2390496		I	0	1
Ex7-442	TTTCACTTCTCACATTTTTTAGAAATATGAAGTTGTCGTCAAAATCCTAAATAATAATTT[T/C]ATTGTATTCCAGACAATGTGATGAAGGCTACATTTGTTTACAAGGCTATGGCAAAAATCC	[A/G]	2L	2390581		I	0	0
Ex12-103	GGATCACACCAGGTACAATCAACTCAAAAAATGCACTTACCCACTATTATCTTGTTTTAA[A/T]TGATGATTTCTACTGGTTTTTTTCCAACATACAACTCATTTCATCCAAAATATACCTTCA	[T/A]	2L	2402558		I	0	1
Ex12-234	AACAACACAACATTTTCCAACGTTCCCCACATAACTTATTGTTTTATTTTCATTTTCTTC[A/T]ATATTTTCTTCTCTTGGTTGTTGCGTAGGTCGATCATTATCTTAGATTATCTATTGTTAT	[A/T]	2L	2402689		I	0	1
Ex12-319	GTAGGTCGATCATTATCTTAGATTATCTATTGTTATTCTTTTTTGTCATTATCTATGCCT[A/T]KCTATAATTCATATTTTAACAAACACCGATAATTTTATAAAAAATAGGTTATGTATTGTT	[T/A]	2L	2402774		I	0	1
Ex12-459	ATACATAATTAACAATATATAATTACCACTACCTACACACTTCAATACTCCACTCCAAAC[A/T]TACTCATAMWCTTATTCCTGTTCACATTCGATCCTCACTCTTTTTGCTTATTCCATAATT	[T/A]	2L	2402914		I	0	1
Ex12-527	AAACTTATTCCTGTTCACATTCGATCCTCACTCTTTTTGCTTATTCCATAATTGTCTATC[C/G]AATGCATTCCTTCTTGTGGTGGACTTCATATCTTGGATCAATCGAAAAATCAACAAAATC	[C/G]	2L	2402982		I	0	1
Ex12-681	AAATCTACAGTTCACGATACGTAACGGTAGAGGACGTTTCGTTGGTGTACCTGGTAGCGA[T/C]AGAAAACCACTGGTACTATCAACATATCTCGATGCACAAGAACACCTGCCATACGCTGAT	[T/C]	2L	2403136		S	0	1
Ex14-221	AAAGGACAGCGAGATTTCGTGAGTTTTGTTTGCTTAGCAGCTTATCTTGATCAGAAATTT[T/G]AAAAATAAAAGTCAATTTCCTAACCATATTAGGACTTGACACAGGACTGTACAGACGATG	[T/G]	2L	2407861		I	0	1
Ex14-300	CCTAACCATATTAGGACTTGACACAGGACTGTACAGACGATGCCGGAAAAATAAAACATA[A/C]CGACAATCCTTTCATAGAACCTGCTCAAACTCAAACTGTGGTAGATATGAAAGGTAAATA	[A/C]	2L	2407940		NS	0	0
Ex14-399	TGGTAGATATGAAAGGTAAATACARATAAAAACAACATTTTGTATTTTGCACACTTAAAT[A/T]GTTTAATCAATTGTTTTCCTATGTCTTCTAGACGTGATGGTGTTAAATGACATTATTGAG	[A/T]	2L	2408039		I	0	1
Ex19-25	GATGCACTTGCAATTACAGCTAAGAGTTTTCAAGCTGGCAAAATCATGGCCTACATTGAA[T/C]CTTCTAATTTCCATCATGGGACGTACAGTTGGTGCCCTTGGTAATTTAACCTTCGTCTTA	[T/C]	2L	2417678		I/S	0	1
Ex20-702	GTTTGTAACTATATTATTTGCAATGTACATGCATTATGCTCTTTACAATGCCAACGCAAT[T/C]YCTGTTAAAGAAAATGCATTAACGATAAGCTTTTAGAAAAAGGTTTAGAGAAACAGCTTA	[T/C]	2L	2422249		I	0	1
Ex20-192	TTTTAGAAAAAGGTTTAGAGAAACAGCTTACAATGTCTTGATGATCAATTCAAGTAGTCT[A/T]CTAGCTTATTCTCAATTATTATATATTCACTAACGCGAATTAAATGCTTTGTGACAGATT	[A/T]	2L	2422340		I	0	1
Ex20-896	AATGCTTTGTGACAGATTTCATCAGAAAATCAGTGTTTTGCTAGCCTAATTGCTTTTTTC[A/C]TTTTCTTTAATATACTTTTTCCAGATAATGTGGATAGATTCCCCGACCATGATCTGCCAA	[A/C]	2L	2422443		I	0	1
Kdr-W	GCTTGTCGGTGATGTATCCTGCATACCATTTTTCTTGGCCACTGTAGTGATAGGAAATTY[A/T]GTCGTAAGTAATGCAAATTAACATGGACCAAGATCGTTTTTACATGACATTGTTTTGCA	[T/A]	2L	2422652		NS	0	1
Ex27-124	GGGTGCAATTATTTGCTGGCAAATACTTCAAGGTAATTGCCTTAGTTTTTCAAAACTATC[A/G]AAATCCGTTGATTTANCTTCCCCGTTATTTCAGTGTGTGGATAAAAATAAAACTACATTA	[A/G]	2L	2429248		I	0	1
Ex27-371	GGATGGATACAAATAATGAACGATGCTATTGATTCTAGAGACGTAAGTTTTGTAATAGAC[A/T]TATATAAAACATGTTGTAAACAATTTAAAACTACATTTTTTTCTATAATTAAATGCTCAG	[T/A]	2L	2429495		I	0	1
Ex31-92	CCGAGTATTGCGTTTGGTTAAAGGAGCCAAGGGTATCCGAACGTTGCTGTTTGCATTAGC[A/C]ATGTCGCTACCTGCACTATTTAACATCTGCTTGTTACTCTTTTTGGTGATGTTTATATTT	[A/C]	2L	2430363		S	0	1
Ex31-285	ACGTTTGGCCAGAGCATGATTTTACTATTTCAGGTTAGTTTTCTCTTTTTATTTAAACTG[T/C]GAATTTTATACTAAATATCTGTAACTGGATCATATCAATTTCAGATGTCAACCTCGGCTG	[T/C]	2L	2430556		I	0	0
Ex31-546	ATCGTTATTAACATGTACATTGCTGTTATCCTCGAAAACTACTCGCAAGCTACGGAAGAT[A/G]TTCAAGAAGGCTTAACTGATGACGATTATGATATGTACTACGAAAYATGGCAGCAATTCG	[A/G]	2L	2430817		NS	0	1
Ex31-644	CTACGAAATATGGCAGCAATTCGATCCTGACGGTACACAATACGTTCGATATGATCAGCT[A/G]TCAGACTTTTTGGATGTGCTGGAACCGCCTCTACAGATTCATAAACCAAATCGTTATAAG	[T/C]	2L	2430915		S	0	1
Ex31-734	TCTACAGATTCATAAACCAAATCGTTATAAGATTATTTCGATGGATATTCCGATATGCCG[T/C]GGAGATATGATGTTCTGTGTCGATATTCTAGATGCACTAACGAAAGATTTTTTTGCTAGA	[A/G]	2L	2431005		S	0	1
Ex31-923	CGAACCAGTATCATCAACACTTTGGAGGCAGCGTGAAGAGTACTGTGCTCGACTGATACA[A/G]CATGCGTGGAAACGCTATAAACAGCGTCACGGAGGCGGAACAGACGCTTCAGGAGATGAT	[T/C]	2L	2431194		S	0	1
Ex31-1085	TGGCAATGAAAATGATGATAGTGGAGATGGTGCAACAGGTAGTGGTGACAACGGAAGTCA[A/G]CATGGTGGTGGCAGCATAAGTGGCGGAGGAGGAACTCCTGGTGGTGGTAAAAGTAAAGGA	[A/G]	2L	2431356		S	0	1
Ex31-1256	ACCAAAGGAATCACCGGATAGCATCGGCGATCCCCAAGGTCGTCAGACGGCCGTTCTTGT[C/G]GAGAGCGACGGATTTGTGACGAAAAACGGTCACCGTGTCGTCATACACTCTCGATCTCCC	[G/C]	2L	2431527		S	0	0
CAT1-U-4	GAGTAATTAAAACTCCTCTCCCACGAACAGGACACCTTCGCCCTCGCCACTACTAAAACC[A/G]GTAGATTAGCTGTTATCAGTTAGGTGGGCAAAGGGGGCAAAATCGTTCGTCTTCTATGTG	[A/G]	2L	5775064		I	0	1
CAT1-3	AATGCCCTGATCCGTCTTGAAGTGGAACTTGCAGTACACTGGCTTGCCGTCCGCGTTGAC[T/C]AGCTTGTACGTGTGTGAACCGTACCCGTTCATGAAACGGTAACCGTCCGGAGTGCCCCGG	[T/C]	2L	5780127	rs3647648	S	0	1
CAT1-2	CGCATTGTACAGGTCGCGAATGCTGTAGTCCGGATCGGTGGCGGTCAGCTCGTTCGCACG[A/G]GCMGGATCCAGATTCTTAATGCCCTGATCCGTCTTGAAGTGGAACTTGCAGTACACTGGC	[A/G]	2L	5780205		S	0	1
AGAMP3_2L_12651349	CCAACCATTTCCCATATTTACCTGATAATAACGATCCATAAACAGCGGTGGTGCATTTTT[A/G]CAATCATTTGTTTCGGGTTCGATCAGATCTGGCTTGCAGCACGAGGCAGGCATCGTTCGG	[A/G]	2L	12651349		S	0	1
SOD2-U-snp1	TCGGAGTAATGCAACGGTCGTAAAATGCAGAAAGTAGGTTTCGGAACGAGTGAAAATATA[A/G]TCAAGTTGTGATAWCTTGATACAGACCAACAAGAACACAACWAATTKATTTTCTAGAATT	[A/G]	2L	12652598			0	0
sod2-snp1	CACCTCCGCGTGGATGACGATCGCCCGGCCGATYACGCTGCGCGCTCCGTACAGCGACAC[C/G]ACCGTGTCCGAGTAGGACGTTTTCGCGATGCCGTTCTCGTCCGCGGCAATGTTACCGAGA	[G/C]	2L	12659228		S	0	1
sod2-snp2	CGAGATYGGTTAATATGATCCGTTGGGCCRACCGTTTGACGGGGGATGGAGTTACGTTGC[T/C]CYGCTTACCTTGTCGGGATTGTAGTGACCGCCGGTRCTGGCACAACCGTCCGTCAGGTCA	[T/C]	2L	12659428		I	0	1
sod2-snp3	GTGACCGCCGGTRCTGGCACAACCGTCCGTCAGGTCACCCTTCTCGTGAATGTGGAACCC[A/G]TGCTTGCCCGGGGTCAGCCCCACGACGTTGATGTCGATGAACACCGGCTCGGTGCATGAC	[T/C]	2L	12659512		S	0	1
AGAMP3_2L_12996602	CAGAAACTGATTATCGGTTTCAGGAACTATAACACGTATAAAAATGCATCACTTCTCCTC[A/G]TTGTAATGCGGGTTATTAATGGTACACCGTAAACCATGTTATGGCATTTTACAGGTTTTT	[T/C]	2L	12996602		I	1	1
AGAMP3_2L_13000217	CCTCAGTGCCTTCCTCGTTCACTTCAATGAACGCTTTGTGGACGACTTTGGACACCTTCA[T/G]TGGTTCGTTTTGCTCCAGCAGGTCGGGGAATTCGGCCGAGTCGCTGAACATTCTTTCCAT	[A/C]	2L	13000217		NS	1	1
AGAMP3_2L_13000865	CTTGATTTTGTTGTTCGTCTTCTCCTCCACCCAGCCGTTGATCTTTTTCGCTGCCGCCGC[A/G]CTCTCGGCAAAGTTGACCGACTCGGCCTCCGACCGGAAGCTGCCGGTGGCAATCGCGTTG	[T/C]	2L	13000865		S	1	1
AGAMP3_2L_14233587	TCATTGTAGAGCCCTGTATATAAACACAGAATGGCTCCACTCTATTATTGGCCGGCGCTA[T/C]CCCATCAGCCCACTCAGCAGATTCTTTCACCTCCTGATCAGTGAGACCCCATCGAAGCCC	[A/G]	2L	14233587		NS	1	0
AGAMP3_2L_14704715	GCCGTTGCGATTGTCAAAGCCGCCAAAGGACTTTCGATTGTCATTCTGCATGCGCCATCA[T/G]ATCAGAAAGAGAGCGATCATCGCGGCCAATGAAAATAAAGAAGGAAGAAATAGAGAAAAT	[T/G]	2L	14704715		I	0	1
AGAMP3_2L_14709512	GTTCGCAAACGAAAACAGCGGGAACGGAAACGTCACAATATCCAAGCGACGCAAAACAAT[T/C]CAGTGCAGTGCGTGTGTTGTTATCCATGGGCTGCCGCGATTGTTGCGTTAAAAAATATTT	[T/C]	2L	14709512		IGD	0	1
COEBE4D-1	GCTGGGGAAGATTAGCAAAATGTCCTCGCCRTGCGGCACCCCTACATACTGGTCCGATCC[T/G]GCAAGCGCTTCCGACAGACCGTACGTTGCTTTGTATTGGTCGAGGTAGAARTAGASGGGA	[A/C]	2L	14710215	rs5496292	S	0	1
AGAMP3_2L_14710561	ATCACGGACCGCGTACTTGTAGTCCAGGATGCTTGGCAGCACCTCGTTCCAGTGATCGTT[A/G]ATGTGGCGTAGGTAGCTTGCGTTGCTTAAAAACTCCGCCGCCGGATACAGACCCTCCGCC	[T/C]	2L	14710561			0	0
AGAMP3_2L_14712644	GTAGTCCAAAATGCTTGGCAGCAGATCGTGCCAGCGCGCATCAATGTCCGCAAGATAGTC[T/C]AGGTTGCTTACAAACTCTGCCCCGGGGTACAAACCTTCCCCCTGCGTAACGGACAGCACC	[A/G]	2L	14712644		S	0	1
COEBE2D-1	TGGGTTTTCGGCYGGYGGTGCTAGCGTKCACCTCCACTACCTGTCGCCAATGTCGCGGGG[A/C]CTGTTCCAGAACGGGATTGCCCACAGCGGTACCGCCCTCAATCCCTGGGTGATGGCYGAR	[A/C]	2L	14713034		S	0	1
COEBE3D-1	CYGTCCAATTGYAGATAATTTCCAATCGACTCTACTTCGCCGGTGTTACAGAGTCAGCAA[A/G]GCTCATGCATCCCTTCACTAATGTGTACGTGTATTACGATCTGTACAAAAGCAAGTTTGG	[A/G]	2L	14714698		NS	0	1
AGAMP3_2L_14715387	GTTAAGGGCGGATCCGCTGTGTCCAATGCCGGATGTGAACAATCCTCTCGAAAGTGGAGA[T/C]AGGTAATGGAGATGTACGCTGGCAGATCCTGCTGAATATCCCACTATGCTAACCGTTTCA	[A/G]	2L	14715387			0	0
AGAMP3_2L_14716972	ATGTCGTATCTGCGCCCTTGGATAGCTTCTCACCGATACCGTACTTGATTTTGAAATAAT[T/C]CACATAGACATACACCTTGGTGTGGGGCTGCATTAGTTTGATCGATTCCGTAACGCCAGC	[A/G]	2L	14716972		NS	0	1
COEBE1D-1	GATTATTACGCATTTGAGGGTATTCCATACGCTAAGCCTCCGCTGGGTAW[C/G]TTACGGTTCGCCTCCTCGGAGYTGAACGATGATCGGTGGACCGAACCACGGAGCACTACC	[C/G]	2L	14718335			0	0
AGAMP3_2L_14719757	AAGTACGTTCAGGAGTCCCAGAACTTGATGCAAAACTTCGATGAATCGTACAAGCACGAT[A/G]TTGTTGAGCCGAGAACGTCCATACTGCCGGAGCGTTCTGTTGATTCAATATCGTTCCAGG	[T/C]	2L	14719757		NS	0	1
COEBE1D-D-1	TCGCTCGGATAAAAAACCAGCTTTGCGTGATGCAGAACCGCTGGAAAGAAAATCGAGCCG[A/G]CGTAGGGAAATGGAAAAGGCAAAGTMTTCTGAGGTGGAAAAGAAATCCAGCCGAACGGCC	[A/G]	2L	14721850		S	0	1
AGAMP3_2L_15360323	ATGGTTGGACAACTTCCGCATCCTCAGCCTGCGGGGCAACCGGATGAATCGGGTAAGTCG[A/T]TCGCCGTTGCCATGCGCCTTGTTCGctctaactctctcgctctctatctctctcctttct	[T/A]	2L	15360323			0	0
AGAMP3_2L_15361470	CTGGTGCGGTTGGCTGGATTCCTACAGACCCGCCAGGGCCGCCACCCGTCCCATACACTT[T/G]TGCATGTTCGGGTTGACGTCCTTCGCAACCGTGCGCTGCACCTGCTTGACCGCGCTGGTG	[A/C]	2L	15361470		NS	0	1
DARE-446	TGCATCAAAGTTGATATGATTGTCGACACTTACGGCTCGGTAGCCGATACTGCGGCACAC[C/G]AGATCRGTGGCGATCGTTTCCCGCTGTTCCGTCGRAACRGCTCTACCGTCCGCCAGCCTG	[G/C]	2L	15364766			0	0
DARE-331	TTCGYTTCAATACACGACCTGRAGAGAKAATKYGTTTTATTTTGGTTAAAATTTGCGGCA[T/G]TTWAACGGCTKGTTTTGAACTCATACCTCCAGCATTGTTMACGCAACCCTTYCTTGCATC	[T/G]	2L	15364881			0	0
DARE-122	GCCGGCRAGMTCCAACCCCGGCCGGGAACCGTTGAGCCGTATGGTGTTGCTGTTGAAATC[A/G]CGACACACCAGATCGGCCACACCGAACGAATTGTTCATGGTYGTTAAGATRACACCGGTC	[T/C]	2L	15365090			0	0
AGAMP3_2L_15373463	GCGCGATTACCACATTGCCTCGGGACATGCGACAGCCACCCTGCTAAACGCGAGGTTCTC[T/C]CCCGTCAAACCCATCACGGCTACAGTGCTGATGCGAAATCTCAGCACAGCCGATGGCGAC	[A/G]	2L	15373463			0	0
PSU-449-rs5669413	CTGTCCTGCACGATCGATCCGGCCGGTTCGTCGTCCTTTACCCACTTGAA[A/G]AGAAACACCAGCCCGTGCACTGGTCTGYAARTAAGCGAGAAAGTGTAYGAA	[T/C]	2L	16855608	rs5669413	S	1	1
AGAMP3_2L_18084523	GGTTTTTTGCTATTGTGTATTTAATTACAATCTTCATTCTTGGTTTTCAATTACTTGTAG[A/G]TAGTGGCATGACGCCGGAGAAAATATTTGCCCTGTTGGAGAGTTCCATCGATCAGTACAA	[T/C]	2L	18084523		NS?	0	1
AGAMP3_2L_18085431	ACTATAAAAGAGTCAAGTTAGCTGTCAAACGCCAAGCCAAGTGTGAGAAATCGTAGTATC[A/C]TAAAAAAACATACGAAAAGGAGGACCCATCAAGAACTTATGGAATTCGCACCGGGCGATC	[T/G]	2L	18085431		IGUD	0	0
AGAMP3_2L_18095849	ATGGCGATGCGTTGCTTCTGACCACCGGACAGCTGAGCGCCCCGTTCACCGATCATTGTA[C/G]CGTACCCGTTCGGTAGTTTCGTGATGAAGCTGTGACAGTTGGCAATTTTAGCCGCACGCT	[G/C]	2L	18095849		NS	0	0
AGAMP3_2L_18106285	GGATCCAAAACCCACTTCAAATGGCAAGAGAGATGGTAGCGAATCAATAAAATCGATTTG[T/C]TGACGTGAGGGTGTGAGAGATTGGCCACATGCAGCTTCTTGAACAAAACGaaaaaaaaaa	[A/G]	2L	18106285		IGU	0	1
AGAMP3_2L_18106516	TGTGTAACGAACTCTATGCGAAGCGGTTGACAGCAAACAGGAAGTCGTTACACCACATTT[C/G]TGATTCGCAGCAGTTTAGTGTTTCAGTCCAAAAGCAAAACGCCACACACGCGTCGTTTGA	[G/C]	2L	18106516			0	0
AGAMP3_2L_18107099	CCTGAAATGATCACCACGTTGTTCAACCGCGCACGCATGCCTCTAAAACAAGCAAATCTT[A/G]GTACAATCGTTTTGTGCCTTCGATTTGGCACGGTTAAACTGCTGATAAAACAAAACTCTG	[T/C]	2L	18107099		IGU	0	1
AGAMP3_2L_18109893	AATAAATTCTATTCTCTAATTTTCTGCCACAATCAAGGGCACACATATTCTCACCTTCCT[A/G]GGGGCGGGGTGGAGGCGAATATTCTCGAACACGCATGCACACGCACCACGTAATCGGGGC	[T/C]	2L	18109893		IGU	0	1
COE19410-U-1	CAATCTTTTCRCTCTGCTCCARCACTTTCATGTTAACGACGGTCAG[T/C]TTCGTGTTGAGATCGATCACCTTMAGCTTCTCCCGGTTCAGYTCCTGCAGCAGCTCTTCC	[A/G]	2L	18166794		S	0	1
COE19410-2	CTCCAGTATGCCCTCGACGCGGCCACAGTTTGTCACGGTTTCGATGTACTTGCCGTCGCG[T/C]ACGGGCGCGGTGATTGGTTCACTCTTACCCACGAACGTGAAGGCAATGATCAGTGCGACC	[T/C]	2L	18173174	rs5681566	S	0	1
COE19410-D-1	TAGCTATTTTAATGTTACACCAWGGCGTATGGTGCATTAGATGCTGTGGTTTCATCTTCT[T/C]GGTAAAAAAGAAAGAACAAGATGCTAAGAGAACATGCGACCCCACATTACGTGACATCGC	[T/C]	2L	18179415	rs3374720		0	0
CYP305A2-u-snp1	CCGTCGCTGATGGTCCAGCACCTGTTCCGCRATCTGRCGRCCAATTTTGCTCGCCTCCAC[A/G]TGCGAATTGATCATGCGCTGTATTTCACGTCCATTCGCTAAATAAAGTTTAGGAAAAAA	[A/G]	2L	18337093	rs5250976	S	0	0
db5663775	TGTTGCTTGGTCTACAATTAAAGCTCTTTTAAATAACAAAAATGTCCAAAAAGCAATCAA[A/G]CTAAGCCATATGTGAGCCAAAGAGAATTCAAATGATCTCGGGATGTCTTTCGAGGC	[T/C]	2L	18344119	rs5663775		0	0
Cyp305A2-D-1	CAACAACAGCCCCATTATGTGCGCATCAAATGGTGAACGTTACTTGCCGTAGAACAAACT[A/G]TGACTCAGATGACCCTTTTATTTCTTTAAACAGRTCATTWAAYGAAGTCTATCAACCTTT	[A/G]	2L	18345696			0	0
CYP315B1-1	TTCCACCTCCTCCATCGCTCGGTGGACAAGCCCGCCCGGTACGACGGTCGCTATGCGTTC[T/C]ACCTCTAGGATGACGGCCTCCGTGTATGGCAGCAAGGGTCTATCGTTAGCCGTCGGTAAC	[T/C]	2L	18350293		S	0	1
CYP315B1-D-1	GTGCATTCTCATCGAACGCATCGATCCGTCGATGGCAGTGCTCACAGACYGGGGAAATCA[A/G]GCCACAAACCGGTGTCACCTGTGGACGATTGGTGGAGCAGTTCAGTAAACATTCATTCWM	[T/C]	2L	18351890		S	0	1
Cyp305A4-1	ACCRGCGATGAAKATATCCAGGATGATCATCGTCAGCTGCACCTCAGWGAAGYTGSTGCC[A/G]TTGTTGGAGGTTCCTTCCCGGTCGCGCATTTCCTTGATGTACGCATAGATCAGATCGTCC	[T/C]	2L	18354716			0	0
db5107701	ATATTTTCGGGAGATTCCCGTTTCTTTTCTTTTTTTCTTCTTCGTTTTGCTCACTTAAGT[A/T]AGTTTCTGTATAGTTTTGTAAATTGTTTTTTTTTTTTGTTTTGTTTTTGTGTTTTT	[A/T]	2L	18356854	rs5107701	IGD	0	0
db5518938	TACACGATTATTATTACTAACGACTTTATTACAAAATATAAAACAAGTAAAAGGGTAGCG[A/G]CGGCGAAGACGAAAAATAATGTTTTAAAACAAAACCCAAACGCTATGTTAAGTAGG	[T/C]	2L	18357349	rs5518938		0	0
AGAMP3_2L_18360708	GTGAACAGAGATTCAAAAGAATAAGAAATTGTAAAATAAATAGCCAACACCAACAACAGA[C/G]GAAGGTAAGATaaagaaaaaagtttaaagcaacgaaaaataacagaaaaaacatgaatag	[C/G]	2L	18360708			0	0
AGAMP3_2L_18781650	AAAGTTTTGCCTTAATGGTCATCTTGGTGCGTCTCGAATCAATTTCACCGAACGTTATGA[C/G]ACACGCTAACACCGCTAGTCGAGCGTGGTGACTTGTACACGCGCGACAATGACGAACCTT	[G/C]	2L	18781650		IG	1	1
AGAMP3_2L_18783493	aaaaaCGGCGAAACAAATTGCACACGCCTGTCCCGTGTCCTGTCGGACGTGGCGCGGGCC[A/G]ACGTCAGTCCGCACACACTTGCATCGCAACGGGGAAGGCACCTTCGCGCCAGCAACAGCT	[T/C]	2L	18783493		IG	1	1
AGAMP3_2L_18791321	AGAAGTAGTTATGCTGCAGCGTCGCCAttttttttttGCATTTTACCACTGTACTTCTCT[T/C]TCTCCCTGTTTCGCACTTGCCAATTTGTGAAACGTTGTGAGGGTAAAACCCTCCTCTCCG	[A/G]	2L	18791321		IG	1	0
AGAMP3_2L_19653648	TACGAAATCCCGAAAGTCTTTGGTTGCCATCACGTTCGGAGCTTTCTCGACTAGAAGATT[A/G]AGCTGCACCCGTACCTGACCCTCGAGCGGGACGCCCAGTTTCTGTGAGATAAATAGAGGG	[T/C]	2L	19653648		S	1	1
AGAMP3_2L_19666297	GAGGAGAAGGGAAGATGTAGAAACTGCACAGCTACACACACACATAAAAGTGGACAAAAT[T/C]ATGGTACTTGTACGAGGCAGTAGCAGGGGGTTGTATGCTATTCATGCTGTACTTTGACCA	[T/C]	2L	19666297		IG	1	1
AGAMP3_2L_19815735	AAACGCGAGTTACGATTGCCACCTATTTAGCAGGAGTCATTGTGAGGTGTTTATAGGTAC[A/G]GAAAAAAGGCATCCATTTTCCCCTTCCAACATCCAAATTAGCTATTCCAGGAAACGAGGA	[T/C]	2L	19815735		I	1	0
AGAMP3_2L_20170095	TTATGTATCTCGTGCGTATCTCTGTGAATGCTAGTTAAAAACTAACACATTCTAACCGAA[T/C]CGGAGGATGGCTGATGGAGGTGCATCATGGTGGATAGCGCGGATTGGCGCCGTGAGACCG	[A/G]	2L	20170095			1	0
AGAMP3_2L_20193257	agaaatgccggacggtctgttccagcagccgttccgtcaacagcaaccacTTATGATGCC[A/G]CTCAGGCAACCGTTGCAGCAGCGCTATCATCCGCTGCAGCCGCTCGATATGAACCTGGGG	[T/C]	2L	20193257		S	0	1
Gsto1-1	AACTTGAGCAGATCGACCCGCTCGCACCACGGCCAGATCATGTAGTCGATCATGCCCGGC[T/C]TATCGCCCCCGAAGTACGGGGTGCCCCGCGCCTTCAGCTCCTTCTCGAAAATGTCCAGCC	[A/G]	2L	20197862		NS	0	1
Gsto1-2	GAACAGGATGCGATAGTACGGCCCRATGACCGAGCCGGCGAACCGCTCGATCAGGATGCG[A/G]TCCTGCGCCTTGCTGAACGGGTCGGCCGGGTACAGCTTGCGCTGCTGGGCCGAGTACGCC	[T/C]	2L	20198029		S	0	1
AGAMP3_2L_20201326	CCCGGTAGATCGGTGTTTCCAGCACCTTCAACACGGTGGCGCGTATTTTCTCCGTCGACA[T/G]CGCGCCAAAATCGAGCGGCTCGGCCACCCCACCAATGAGGGAGCGTTTGAGGTTCTGGAA	[A/C]	2L	20201326		NS	0	1
GSTo1-D-snp2	TCGGATSCTGTCGGAGTATSAGTCGGCCGGAGCYGGAGACATTTAGAGTTTAAGTTGATG[C/G]CGTATGACGCAGATATAAAAATGCCAGGCCGTCTCCATTTCCAACTCCGGTTGACTCTGG	[G/C]	2L	20203803			0	0
GSTo1-D-snp1	CCGTAGCTGAAATCGGAGTCGTRTGGAGTYGTATTCGGCTGAATTTGGAGTAGGTCCGAG[T/C]GGTCCGGATTGGGATCTAGTCGGAGTTGAAGTCATCCAGCGTCGAAGTGATCAGGAATCG	[A/G]	2L	20203947	rs5456068		0	0
AGAMP3_2L_20279285	CCGTTTTTGGTAAATTTTTTCAGCAATAATCAAACAATACGTAATTCAAGTGCATCAGTT[T/C]CTAAGCCGAATTCAGCATTGAATAATGATAAGTTTGGATGTCATGTAGATTACTTTTAGT	[A/G]	2L	20279285			0	0
COEAE1E-snp3	CTCAATGCCTGCCTCAGGSAGGSAAAGAAATCCAAGTGGYCCAAGCCGATAGTTGAACGT[A/T]ACGATCACTACGCGCTGCTCCATAAAGTGCACCGGATCGTACAGGAACGCATCACCACTG	[T/A]	2L	20287940		S	0	1
COEAE1E-snp2	TCCGAACTGGCCGATATTGTTCCGGAYCCACTGCAAMACTAGCAACTGATCCTTCAGTCC[T/C]GCATTACCCTCAATGCCTGCCTCAGGSAGGSAAAGAAATCCAAGTGGYCCAAGCCGATAG	[A/G]	2L	20288009		S	0	1
COEAE1E-snp1	TACAAYAAYKTCTTADCAACAAAACTHCTCGAAACCTCACCTAGAAACCGGAGAAAGGTA[A/G]TGCAGATAGGCCGCCTTAGCTCCTGCACTCTCACCAAACAGCGTAACATTMTCCGGATCW	[T/C]	2L	20288132		NS	0	1
AGAMP3_2L_20288296	TCAAAGTGGAGTCGCTTGTTCCGACTTGGCATTTCAAGTCGAACCAAGCGAGAAAGCCCG[T/C]AAACTAGCGAAGTGTGTGGGTTATGAAGGATCATCCGACCAAGAAGCACTGGGTAAGATC	[T/C]	2L	20288296		S	0	0
AGAMP3_2L_20288926	GAAGGTGAAGCATTACTGTTACTACTTCACGCACGACGGTCGGTGGGGAAATTTGAAGCG[A/G]TTGCTGAATATGTACCATCTGCCGGGTGTTTGCCATGGGGATGATGTGTTCTACATGTTT	[A/G]	2L	20288926			0	0
COEae2E-1	TACGCGACACCAGCTGTAACATTTGCAAACTCCTCCCAAACTCACATAATGTTCACACCTCCTTCACC[C/T]ACTTACCGCGAGTTCGGYGATAGGTAGTGCAAATACGCCGACATGCTACCGGCACTTTCGCCGAACAGTGTTACATTGTCCGGGTTGCCCCCGAACTGAGCAATGTTTTCATTGACCCATTTCAACGCCAGCAGCTAGCAAACAAAAACAATCCGGTTGATTAGCGAGTTGACACTTTCGATTTCATGTTTCTATGTGATTTTTAATTTTGCGCAAACACTGCCCATRSGCACGATCATTACCTGATCTTTAAGGCCCGCATTGCCYGGRATGCCGGCGGCCGGCAGGTAGAGGAATCCGTGCGGCCCCAACCGATAGTTGATGGT…	[A/G]	2L	20291121	rs5508290		0	0
COEAE3E-snp1	TRCAATCTCCTTTCTYGRYACCAAYTTTACAGAAACWCTGCAACAGGTTCCAGCGAAACA[A/G]TTGGCCCAGCAGCAACGTAAAGCCCTTGGTCAGCATGCAGAGAAGCAGTCCGATCTKGTC	[T/C]	2L	20297682		S	0	1
COEAE3E-snp2	ACACTCCATCATAACAAAACCCCCCGAAGAGTTGCTCAAATCGTACGACACACTCCGTAC[C/G]CCCCTGCTGGAAGGCTGCAACGATGCGGAAGGCATACTCGGTCTGTACATC	[G/C]	2L	20297841		S	0	1
AGAMP3_2L_20308576	TCTCTAGGCACCATGGAAACGCGATGCACCGAACACGAGCAGCAGCTTGAACTCATTCAA[A/T]TCCTCCCACTCACCAGCGGGTGAGAGGGAGACTAAAGAAGAATGGAAAACTATTCAATAA	[T/A]	2L	20308576		IG	0	1
db5593251	TTGTTTGCTTTTTCAAGGGCTTTGTCCAAAATAAGGGTCTACACGCGCGCCCGGTGACTG[C/G]AAAAGAGTTGGAAGACGTGTACGCATCTCTCCCACGGGCCGGTTGCCGTAAGTTTA	[C/G]	2L	20452907	rs5593251		0	0
AGAMP3_2L_20455257	TGCCTTTGTCTTCCCTTTTTCCCGTTGCGCACAGGCAGATCCTCACGCGAGCAGTATGGT[T/C]GGGCAGAGAATAGCAAACTCTTTACTGAAGAGATCCGCCTTTTCGTCGGCGTTGAATGTG	[T/C]	2L	20455257		S	0	1
AGAMP3_2L_20456998	ACAGTCACTAACAGACTCCTTCTTGGATTTCGTTTCTTTCCTTCGCAATTTAGAAACTAA[T/C]CCACACACAAATCAATTTGCACAAAATTAAGCAACGGACAAATTGCAACGCAAATAGCAG	[A/G]	2L	20456998			0	0
AGAMP3_2L_20457336	TACATTGCATACAAATGTGTCTCCAGGTACACACTGGGTCACCATTGTGTGGAGTTATTA[T/G]TTTCCGCTTTTTTATTTCGCACACTGAACTACAAAAAACTAACCTACCCAAGTGACATGT	[A/C]	2L	20457336			0	0
CYP49A1-2-1	GGGAGTTCGTTTAGGAGTAGCTTACATAATTCACACYAGTTTCTAGCTAGTTTCTAATGS[A/C]CGAAGCAGTTACTCAAGGGATCTTTAGAAACCTCCTTTTTTACCAACAAATTT	[T/G]	2L	20459920		I	0	1
AGAMP3_2L_20460163	GCAAAAAATTAATTCAAATTCCCTATTTGCACCTCGTGGTAGCAAATTTTACAACAGCTA[A/C]TACATGACTAAAAAACTACGCACGCACTATCTTGTGGACACAAACAATTGTCCTATTTTC	[T/G]	2L	20460163		I	0	1
db5622427	TGGTTGGACGGGGTTGGTTGGCGTTGGAAATCGCGTACGGACAAACGAGCGTTCGTGGCC[A/G]GTTCGTGTCCGGCGTACATACGATAGCATTTCTACAGCACACCTGTGCGCTTCTTC	[A/G]	2L	20460435	rs5622427		0	0
db5623391	GTCTTCAACTACCGATGAAGACTCCCATATCCCAGGACCTAACCTTAATCATGGCCCGCC[A/G]CACGGTGTGCTCTGTTGGAGCAGGTGTCACACACGGTGGCGGGTTTAGATTTCCAA	[A/G]	2L	20460590	rs5623391	I	0	0
db5638595	GGTTAACGGACTGATCGGACATCCGGACCTGCTGTTTGTGTTCGATGCCGACCTCATACG[C/G]GACACGTTCAAGCGGGAGGACGTGCTGCCCCACCGGCCGGCGATGCCTTCGCTGCG	[C/G]	2L	20461482	rs5638595	S	0	1
CYP49A1-D-2	GCGCGGGTACGTTAAGAACCATGCTCAGGTTTGCCTCTTCTGCGCGAGCTACTAACCTTG[T/C]RGTGTTTGAGATTGGTAACGAACAGCGATAACTCTTCATTTTTGTTYTCATTGTTGGTGT	[T/C]	2L	20468567	rs5342132	I	0	0
CYP49A1-D-1	GTGTTCGAACGCAGTGATTTTCTAAATTTAGCCCCACAAACCTACCGAATATTGTT[T/G]TTGGCTGGTGGTACGATCTGGGCGTTGCTGGTGGTGGATGATKCGTGCCACGCCAGACCT	[A/C]	2L	20468922		I	0	1
AGAMP3_2L_20505318	GTACCCTAAACGTCAAGCCGCCAAAACGTCAAACCGCTGCCACATTCCGTTACCTGGTCG[T/G]CTGGCTGGCTCTGGTGAGCGGGCACAGTGTCCGATCGTCGACGCAAAAGCAAAAGGCAAG	[A/C]	2L	20505318		IG	1	0
AGAMP3_2L_20531329	TGCGCTACGGGAGAGCGAAGAGCGAAAGCGTGGGGGATAAACCATACCAGCAGCGGTGGC[A/T]GTAGTAATTTCAGTGATGAGTTTGTACATTTTGTTATGAAGCCGCCTTCTCTACCCTCCA	[T/A]	2L	20531329		IG	1	1
AGAMP3_2L_20880231	CTGTGTGCAACCGAAAACAAGAGAGAGacacacacacacacTTATGTGAGCTTCTTATCG[C/G]ACAATTGCTTTCGTTCGTTCACTTTTCAAAACTTCCGTCCCCCCATGTTCGCACTGGCAC	[C/G]	2L	20880231		IG	1	1
AGAMP3_2L_21254253	GTTTGACAGTATGGAAAAGGTTCCCCGAAAATTCCCCAAACAGTCATGCCTGGTGTGAAG[A/C]GAGAAGCTGCTATTATCCCCGCCGGACTTACTGGTGCGGCGGAGGGCCTGGGTGGGCCTG	[A/C]	2L	21254253			1	0
AGAMP3_2L_21616878	GTGGATGAAGAAGAGCAAAAGCGATATTTTTGTTTATTAAATTAATCCACGATTCAGCGA[A/G]CGCGAACCATCATCATCCCCAACAACATCATGGGAAATGACGAATGTGCCTTCAGCGTTC	[T/C]	2L	21616878		IG	1	1
AGAMP3_2L_21962412	GCTTTGAAGTCGCTACTCTTTGCTGCTGCTGCTGCGGGCGCACAGGGACGACGATTCGGT[T/G]GCGTTCGGTGGGAAAAATTACCGTTCATTTATATGTTGATCGGTGGCGGCTAATTGAAAT	[T/G]	2L	21962412			1	0
COEJHE1F-U-2	CGCCGGTGACAATGGCAGCAAGGAGAACCTGTTCGTGCCGGAGTCCACCAGCGAGGAGGA[C/G]GAGCTGGAACCGAACGAGTACGCGGAACAGTACAGCGAGTACGCGGAGGAGCAGGACGAG	[C/G]	2L	22291471	rs5421482	I	0	1
AGAMP3_2L_22292554	GAAGCTGATCGGTCCTACCAGGAAGAACTGAGACGGGCTGAGCAGCAACTCGATGAGGTA[T/G]GTATGGTGTAGTTTTAGTGTGTACTACAACTCATTTCAGTCACTCTTCTTACGTTCAAGC	[T/G]	2L	22292554		I	0	1
COEJHE1F-snp2	AATBAATGCATCATSTAYACTYACCTTYGTYAGYTTGTCCACATTTTCGTGCGTAAAACA[T/C]TCGCCGATCGACGACTGATTGCCGAAGAAGCGCTCCATCAGGATCGGCAGWGCGTCCGTC	[A/G]	2L	22296611		S	0	1
COEJHE1F-snp1	GGCACACCTGTCCGTACCCTGGCTGACGGGGATCGTGCCAAACGATGGGTTCGTGTTCAG[T/C]GCTCCCATCCTGAAGGACACCGACTGTTCGAAGGAAACGTTTGCCCAGCAGAAGACGCTG	[T/C]	2L	22296761			0	0
COEJHE2E-snp2	ADSAAGCCGAWAACACAGAGAATTAGTTTCTAGKGAGCTCTAAAACAGACATCTTCACCA[C/G]CTAAACCTTACCCATTGATTGCGAAATCGATGAAGAAGTTCACGAAYGTGTCCACCATCT	[G/C]	2L	22299610		I	0	1
AGAMP3_2L_22300825	GGCCGTATCGCCCGTCGACAGGAAGCCGAGCACACCGAGCCGGTACTGCACGGTGACCAG[A/T]ATCGCCCGCTTCGTGTCGAGAATGTACTCTGGGCCGACAATGAGCGAGCTGGCCGTGCCG	[T/A]	2L	22300825		S	0	1
AGAMP3_2L_22307407	TCCGTACGACAATTACATTCCGTAATTACGTCACCACAATTACTTTCACTTTCTCGCACG[T/C]CCAAGAAGAGGGAGCAATGGCAAAAACTGCACAACTGCGCCCACAACACCACCGAAGGAT	[A/G]	2L	22307407		IGUD	0	1
COEJHE3F-snp2	AGGTGTTGCTTGATGTTCYTTACCATCGGGTACTGGAAATAGGCTTCCGAAAACAGCTAT[A/G]GAGAGAGAAGATGTTTTAAATACGTTAAGGAGTTTGATATTGAGGTTCATCTTCCAATTG	[A/G]	2L	22311409		I	0	1
COEJHE3F-snp1	TCAATTAGTGATTCATTCTTGTAAATCGTCTGTGTGATGATGGATCCTTCGTTCGGAATG[T/C]TTCCCGTCATCCAAGGAACAGCTGCATATGCACCCCGCCTCCAAGCAGCTCGAGGATCTT	[A/G]	2L	22311691		NS	0	1
COEJHE4F-snp1	CGTCGAGCTGACACGCAGTACTGAACGGTTAAAGCTRTGGGATATTCACCCGATCACACT[A/G]TATCATCCGGTGGTGGAGCCTCCGGAGGAACCAGAACCCTTTTTGGCCGAGGATCCTCGG	[T/C]	2L	22314525		S	0	0
COEJHE4F-snp2	GGCAGTAAGCATGAGCGGTAGTGCTATCTCGAGTTGGAGYGTACCAATCGAAAATCCTCT[A/C]ATGCTGGCAAGGGCACAGGCGAAAGTGCTCGGYATAGTGGACGCCAGCGAGCTRTCGACG	[T/G]	2L	22314681		S	0	1
Coejhe5f-snp3	ACAATTYTCATCGCCAACGATCGGTTGTCCGGGCAGCAGGAATGATTTCTGCAGGCAGGC[A/C]GGTTTGCTTTCGGTTGCATTGTAATCTTCGGTCCAAGGTTCGATTGGGATGGGTTTCTGT	[A/C]	2L	22318179		S	0	1
Coejhe5f-snp4	ATCTTCGGTCCAAGGTTCGATTGGGATGGGTTTCTGTTGGAGATAGCAATGAGTAACGGA[A/G]CACGCTTTACACTCTTCCCAAAAGCAMCTACCTTAAAGCGAAGCTTTCCAACCGGTGGCT	[T/C]	2L	22318263		I	0	1
Coejhe5f-snp2	TTTACACTCTTCCCAAAAGCAMCTACCTTAAAGCGAAGCTTTCCAACCGGTGGCTTTGCA[A/T]AGGGAATGCCTACGAATGCATCGAACCTTAGGTTCTTCGTATCCGTCATCGATGTTCCCA	[A/T]	2L	22318329		NS	0	1
COEJHE5F-D-snp2	GAGCAGWGAGTTTGCTKTAACTTTTCGATSTYAACCTGGTGTGCGGGCCTAGCAGGGGGG[A/C]AAAGCTTTCGAAATCTCTTTGAAGAGCACCAGGGAAAAGAGCAAACAAGGTCAGYAGTGT	[A/C]	2L	22319973		IGU	0	0
COEJHE5F-D-snp1	CAAGTGGCTGACGAGYAGTAGTTACCTTCACCGCGCTCCGGTAGTGTTTTAGACGGGCGG[T/G]ATAATATAAACTGTCACCGCAAAACCGACTGGATCTGGAACCARMMGGGRGTGYCCAACC	[T/G]	2L	22320154		IGU	0	1
AGAMP3_2L_22688837	TTCTGTGCCTGGGACGGTGGTGAATAGCAGTCCCTGTTCGGGGGGCTTCGCTGTAAAACA[A/G]AAGATGGAGCAGTTTTCGAACGTaaacaaacaaaacaaaacaaaaaaTAACAACGTGTAA	[A/G]	2L	22688837		I	1	1
AGAMP3_2L_23044917	AAGCGCGATGCGCAGTTACGAAACGTTACACACGAGCCACCCATTAACCACCGACATCAT[T/C]CGTCGTGATTCGTCCTCGTGCGCATCGTCCCCGCAAAGACCACCGAAATCCGAAAGAAAC	[A/G]	2L	23044917		IG	1	0
AGAMP3_2L_23418934	GGGTGTATGTGTGTGTGTATGTGCAGTAAATTTTACAGTCCACAGGCATGTGGTATTACC[A/G]ATAAATTGGACGTGAAGCTGTCCACTGTTAATTTGGTGGGGAATTATCTTGGTTGGCTTA	[A/G]	2L	23418934		I	1	0
AGAMP3_2L_23637267	GATCCCTTTTCTGCATTGTGCAGAGGAAGGCAGCGGCGGCCCAATTTCCTTCCGAACACA[A/C]GCGCGTCCTTCGCCACACAAGGGGTATACTACACGTGTACGCACACACCCGAAACCGAAG	[T/G]	2L	23637267		IG	1	0
AGAMP3_2L_23641781	cacgcacggaaaaacaagacaatcacacacacatgcgcgcacacacaaacacaAGCCTTG[A/C]GTTTTTCACTGCGTTTGTCGAGCGAACTTTTCCTGAAGCCACTTTGCCGTCACCACTGGA	[T/G]	2L	23641781		5UTR	1	1
AGAMP3_2L_23649144	TTTTTTGTTTTGTTTAATCCGCCGTTAACTTCTATTCCCTTGTGTATGCTTCATTTACTT[T/C]CAGTTCCAGTTGTTTGGGTGAATTTCCGTGCATTTTCCTTTCCTATTAGATTGCCATTAG	[A/G]	2L	23649144			1	0
K3M-127	GATGCCCCACAACTATCTGCACATCTGGCCGCGCGGCCAGTTTATGATGAT[T/C]GCGCTGCCGAACCAGGACCGCACCTGGACGGTGACGCTGTTCATGCCGTT	[A/G]	2L	23987558			1	0
AGAMP3_2L_24495095	GtttttttttAAATGGGAAAAGCTTCTCGGTCGTGATTATTGGAGATTTGTATTTGAAAC[A/T]TATGATTTAAAAACCCCAAAAAATGGAATAGGGTAAACGTACCTatagtggtggtagtac	[A/T]	2L	24495095			1	0
Cyp302A1-U-1	KGCYGTGTCGTTTCGTTCCTTTATTRCCGGTTCGRTTGCCTGCTTCATGACCGCGTGCAT[T/C]GCAGGTAAGAAGCAAGCGARGRAAAGCTTTCTTTCATTATGCKTTCATGACGRTTTSTAC	[T/C]	2L	24565924		S	0	1
AGAMP3_2L_24566967	GTACCGCGTGTAAAGGTTCTGCGTACGATCGTACACGTTGCGCGTGACGGACAGCATTTC[A/C]GGCAGCAGCTTCATCGCACCGGCCACATCCATGCACACCCGCTCGAGCAGCTGGTCCCTC	[A/C]	2L	24566967		S	0	1
db5284073	GGATGCAGAAGAAAAGGCCTTAACTTACATCCCAGCACAGCCGCACCGATTCGATTTTCC[C/T]TTGGATCGGGAAGAATTTTCTTCGCCTCCCGGTACAGCCGGTCCTGTGCGGTGGCC	[T/C]	2L	24570928	rs5284073	NS	0	1
Cyp302A1-1	AYACCAGCTCAACGGCCGTCTTTTCCATAAACTCTTGCGCTTTGCGCAACCGTCTGTAMG[T/C]GGGCGTTTCAAAGTAGCGCCACAGCTGGAAGCCCTGRTCGGTGGGCAGGATGCAGGAGTT	[A/G]	2L	24571250			0	0
AGAMP3_2L_24573746	agtgtcccacagctatgagatttcctggaaaactctgTAAGTCGTACGGGAAGTCGAATA[T/G]TTACAAtaatttaaattgattttttttattttctatttaaatcatatttttttatttCTA	[T/G]	2L	24573746			0	0
Cyp302A1-D-1	TCTTTGCGATCTCCGTTTCGTAGTTCG[T/C]ACGCGTATGACGAATGTGAGTGTGACACATTCACCCTTCTGCTTCGTGGATTGTATCACA	[A/G]	2L	24577059		IGU	0	0
AGAMP3_2L_24868617	ATGTTGCACAAGGTGTTGTATATTTCACGAACTTTGATTGTACATTTTTCACCTGTCCCT[T/C]CATCCATTTGATCCTTGTTAACTTAAAacacacgcacacacacacacacacacacaTGTT	[T/C]	2L	24868617		IG	1	1
bHLH-PAS-4	GTGGCGACAAATTAGCTCACATGCTCAGCAAGGATAATTTGAGCTTTCAACTTTCACYTG[T/C]AGATCTTACATCGCTGCTGCCGAACTCGTTCGAAGCGCTCGATCAGTCTTTGCTGACGAT	[A/G]	2L	24931524		I	0	1
bHLH-PAS-2	GCACGCGCTGGGCAACAGCGATCTGGCCAACTGCTTTAGCGATCTTATCAACCCTGGCTC[T/G]GGTAAGTGGCGACAAATTAGCTCACATGCTCAGCAAGGATAATTTGAGCTTTCAACTTTC	[T/G]	2L	24931590			0	0
bHLH-PAS-1	ACCCGCCTCGTCCCACTACAGCCAGCGCAGTGCGCGAAGTCCGTACGGTGGTTGTGGCAG[T/C]GGCATTGCTTCCCCTCCGGCYGSAATACACGGYGGTGGTRGTCGAACAACGACCGTGCTG	[A/G]	2L	24931824			0	0
AGAMP3_2L_24935153	ATGATCCTGCCGCAGCTTTCGGTCGATTTCCTCCTCGTCGTCGTACGATCGCTGGAACTC[A/G]CCGCCCCCATCGGTACCGTGCGTGCCGGATCCACCCTCCCCGGAGCCCAGCAGGGCCGGT	[T/C]	2L	24935153		S	0	1
AGAMP3_2L_24940524	GAAGCGCAGCACTGCAGTTTTGTCCACCCGGCGGGGCGATTCGGCCACGTGCGGCACCAT[T/C]GCCGAAAGTTCCTGTATCGATCCGTTAAGCTTGTCTCGCCGGTTCTTTTCCGCCCGGTTT	[T/C]	2L	24940524		S	0	1
AGAMP3_2L_24957228	CGCGTCTGTGTCCGTGCCCTTCACTATCAGCCCACCAGGGAATGCAGCTTGTTTGTAAAT[T/G]TAATTCTAGCCCaaaaaaaaCCAAGCAGCCCATCACTTCCTAACAAGATCGATCGTAGCT	[T/G]	2L	24957228		IGU	0	0
AGAMP3_2L_25241133	GCCGTTGCTGGTAGTGATGAAGATGAAGTGGTAAAGGACTAGCATTCATTTCCTCTACCA[A/G]CGACCGAATGAAAAATGATATGAATGCTTAAGTGGAGGAAATGAGAAAATTTCGTCACGT	[T/C]	2L	25241133		IG	1	0
RDL_LRH_1	TTGCCGATTCAAGGAGATTTAAGCTTTTCTCGGTGGCTTCTTC[A/T]GCTGTGTACTAGTTGCGCACTATTCTATAGGGCGCCAGTTCTGTAGATGCTGGGGT	[A/T]	2L	25392198	rs5733667	I	0	0
AGAMP3_2L_25413476	aaagaaatgtaaaaTTACACCTCAATTCATCAATAATCTGCACCCTTATCAGTGCAAAAA[C/G]TAACCCTTTCGTTCATCATTCTCTCTACTTGTGCATTACTCATTTCCCAATCCTGTTtgt	[C/G]	2L	25413476			0	0
RDL_LRH_13	CTTTCTTTTTTGCTGCTGGGCTTCCCCCCGTTGCCGTGCTTTCGTTCCGTCCACCCATCC[T/G]TAATCCATTTTACACGCCRCGGGTGGCGCAAATAATTGGAAATCTCATTACCCCGCAAAA	[T/G]	2L	25421929	rs5366895		0	0
RDL-SER_20	TTCGTTGACGACATCAGTGTTGTCATTGTCAAKACAGTAGTTACACCTAATS[A/C]AACACGTGCTGGTGTAGCATTTCTATTTAGCCAAAATGATACCCACGA	[T/G]	2L	25429235	rs5721314	NS	0	0
RDL-GLY_20	TTCGTTGACGACATCAGTGTTGTCATTGTCAAGACAGTAGTTACACCTAAT[C/G]MAACACGTGCTGGTGTAGCWTTTCTATTTAGCCAAAATGATACCCACGA	[C/G]	2L	25429236			0	0
RDL_LRH_9	GTTCTTTATTTTTTGTTCGGTGCCAAATCATTCACCGC[T/C]GTACGCTTCCAGAGTACACCGGCTACTGGAGCAGCACGGGCTGACAC	[T/C]	2L	25447789		I	0	0
RDL_LRH_7	GTACATACTGTCGCGCGTCAAGAAACCGGTCGGCGGTGGWTCGACAGGAGCGACGGC[A/T]GCGGCGGTGGTGGGTGGAGGCAATGGTGACCTGCGGTACATGATACCGGCGAGCGCTGCC	[A/T]	2L	25451622			0	0
AGAMP3_2L_25466274	CATCAAGTGTCAGGAGAACGAAACCGAAATCCATGCCTCGTACCTCGCGAAGGTGGAGAA[A/G]GAGATCGCCGAGCTGAAGCAGCGGCACATGAACACGACCGCCAAGATAGCGGAGCATCGG	[A/G]	2L	25466274			0	0
AGAMP3_2L_25478336	GATGGTTGTGTGttttttgtttgctttttacttttCGAATTCGGTATAACTATGGCTTCC[A/G]ATGTTGAGAGCATGCGAGCCTTGAgggggggggggggggggAGGTGTATTTTCACGCACA	[T/C]	2L	25478336		IG	0	0
AGAMP3_2L_25604418	TTTTCGGGATCATTAAGCAGTCTTCTGTGTCTATAATTGGAATGTCCATGATCTCTACAC[T/C]CTGGCTCCCTGCACACAAGGCCCGACAGAAACGCACGCACGCACACACGCACACAAGTCC	[A/G]	2L	25604418		I	1	1
CYP4J9-U-1	GTAGTCCACGCCMCCRATCRCCTTCCTGATKAGGCGGAACGCCTCGATCCAGAAGCACGG[A/G]TTCTTGTACACCAGCTTTTCCGAGCACATCAGCTGATCGCACAGCAGCTTGGCCGGTATG	[A/G]	2L	25627596			0	0
CYP4J9-snp2	GTACGAACACCAACTCCTCGCGC[T/C]TCGTAACGGGCAKAATGCGAAAATGCATCAGTATCGCCGCGAGGACCGYTTTMAGCTCCA	[T/C]	2L	25632293		NS	0	0
CYP4J9-snp1	RGAGCTGCAGGAGGTCGCACAGTCCCGCACCGACGCGGACGATGAGTTCACCCAGCGCGA[T/G]TACAMCGAGCTMCGGTACATGGATATGGTGTTGAAGGAGKCGCTCCGGCTSTACCCACCC	[T/G]	2L	25632655			0	0
CYP4J9-2	ACGCGAGCTTTTCCATCAGAATGTACGCAACATTGGGGATTTTTCGGAGGAAAACATGTA[T/C]GCCAACTACGCGCTAGTGATAAATTGATCTTCAGTRGCTGA	[A/G]	2L	25632987		I	0	1
CYP4J9-1	ACTATCTGYGGTAAGACACRAGGAGGCATGTGGAGTCCGCTTCTAGTTCGGTGTAGGTAT[T/C]ATTCTTCCCATGCTTTGCTCTAGAAACGGCCATGGGAATTAAGCTCGACTCGATGACGAT	[A/G]	2L	25633278		I	0	0
CYP4J5-snp5	GAGCGTYACVGAAGAGATCCACCTGCCGGACGGGMGGATCATACCGCAAGGATGCATTGC[C/G]AAYCTGCACATCTTCGATCTGCACCGTGATCCRGCCCAATTTCCCGACCCGGARCGGTTC	[G/C]	2L	25634726		S	0	1
CYP4J5-snp4	AACCCGTCTACAYCAAGAGCTCTCTCAACTTGCCACCCAAAACGATCTCACCGATGGACA[T/C]CTCTCVCCGAACGATTTAAACTCAGCCAAATTCTTCGATCGTGTCATMAAGGAATGTCTT	[T/C]	2L	25634879			0	0
CYP4J5-snp3	GTTCGGBGAGAGRTGTCCATCGGTGAGATCGTTTTGGGTGGCAAGTTGAGAGAGCTCTTG[A/G]TGTAGACGGGTTTGAATTTCTGGCTCCCAGGACAGGGTAAGCAGGATGAAGACGAGYGCT	[A/G]	2L	25634927		S	0	1
CYP4J5-snp1	TAAACTMAACGATCTTAGCTCGTCKCAAGACGAAGATCAYTCGCTCTACAGTACCACCCC[A/G]GGSGGTAAGAAACGGTACGCCATGCTCGACACACTCCTTACAGCGGAAATGCAAGGCCAG	[A/G]	2L	25635116		S	0	0
AGAMP3_2L_25635785	GAACGGATACATAAACCGATACAGCAGGCTCTTTTCCGTGTTGCGAGATCCACTCAGAAA[T/C]GGTTCCGCCTCTGTGCAGCGCGTTATGTTCAGTATGAAGAGGTACCGATTAAGCCACAGC	[A/G]	2L	25635785		S	0	1
CYP4J10-1	CGGGTCGGGGAATTGGACGGGATCACGGTGCAGATCGTAGATGTGGA[T/C]GTGTGACATGGTGTTGTGCGGAAAGRTTGTRCCATCTGTGGSAAGGTGRGAAGAAGAGAT	[A/G]	2L	25636722		NS	0	1
CYP4J10-snp1	GTGATGTATTGGTTTGAGTGATTTTG[A/C]CAGCGGTCCMTCGTAGCCTAGCAACCGGTAGACACGRTCACTGTACAGCCAGGGTGACAT	[A/C]	2L	25637722		NS	0	0
CYP4J10-snp2	TCCMTCGTAGCCTAGCAACCGGTAGACACGRTCACTGTACAGCCAGGGTGACATCGTGCG[A/G]TGGACCAACATTTCTCCCACCTCGTACACCTTCTGCTTGTACTCATCAGCCTCACGGTRA	[A/G]	2L	25637789		S	0	0
CYP4J10-snp3	ATCYCCAAYTAATCARTTAWTATCSYTCAAAACRCWACAGAAACGGCGATGGGTGTGAAG[T/C]TGGACGCTYACCGTGAGGCTGATGAGTACAAGCAGAAGGTGTACGAGGTGGGAGAAATGT	[T/C]	2L	25637857		S	0	1
CYP4J10-snp4	TGCCCAAGTTTCTGACCATCTTCCAGGAGGAAAGTGAGCAGCTAGTGCGCCGGTTGGACC[A/G]GCTRGCCGACGGWGTGCAGGACGTTGTACTGCAGCCGATTGTGACGAGCTTTGCGCTGCA	[A/G]	2L	25638024			0	0
CYP4J10-D-1	CCAGCATGATCTCGCGCAGCTGGTTCGCCCGCTTCAGCCCATCGCCCAG[A/G]AACGGSGACACCGCACACGCATTAAACAGCGACGTGTACGTGCCGCCCGTCACCTTCAGG	[A/G]	2L	25643225			0	0
AGAMP3_2L_25645273	AACACGCGGGTTAGTGTAGAATGGGATTATAAGGGAAAATGGAGGAGGGAGGTTTGTTTA[T/C]AGTGTTCTGCTTTGTTTTTATATTTTAAGACACTATTGTTTATTATGTATTACAGGGTTT	[T/C]	2L	25645273		IG	0	0
AGAMP3_2L_25972552	TTTACTTACTTTTGTCCAGGAGTTGCCAAAGGCTCAGGCACTGATGCAGGACAACCTGTC[A/G]GCCGATGAGAGCAATCTCCAGACCATCGATCGGGAGGAGAGCAAGAAGCACAAGCAGGAA	[T/C]	2L	25972552		S	1	0
Cyp301A1-U-1	GCAGCTCTTCCCCATYGATAACTTYGAGCTCCTCTAGCTGACACTGTGCTAGACACTAAA[T/G]AGAACCGAGAGCAACAAAAATACACTGTTTAAACTACACRGGCAAAAATKMACTCTTACA	[A/C]	2L	26132130			0	0
AGAMP3_2L_26133930	TGCAACAAGATGCGAAGCGGTGAATGCTTCCCAAAGCGCGGCAGACAGTAGGGGCGGTGT[T/C]GGAGCATGGCTTAATCGGTgtaaaaaaatacctgatatatagaaaaataaaagcaaatgt	[T/C]	2L	26133930			0	0
CYP301A1-snp1	GGCTCGGGTGTTTGGAGCCGAATCTGGAYCCGAAATCGGAACCGCAGCAAATCATCAA[T/C]GCGGCCAAGTATGCGCTGCGCAATGTGGCCACGCTCGAGCTGAAGGCACCGTACTGGCGC	[A/G]	2L	26137692		S	0	1
AGAMP3_2L_26139488	GACaaaaaaaaaaCCATGGACAAAACTGTATTAAGCCTCCTGAGTGTTGTTGTTTTGACA[A/G]AGATTGGTTGTTGTTTTACAGTTAATTACATTTCATTCCATTTTTGGGAAGCTATATTTG	[A/G]	2L	26139488			0	0
db5708093	TGCAACGCGTCTGCTGCTGCTGCTGTCGCTGAAGCTGCACGGCCGTCCTTGGTTGAGCGA[G/T]CGTACGCACCGCAGTCAGCTCACGTATCAACCGTTGCCGGGTGTGGTTCATTGTGG	[T/G]	2L	26141052	rs5708093	NS	0	1
db5729046	TTTGACAGGCTCGGCATGATAGTGACCGGTGTGGACCACCTATCGATTGCCAAGTTCAGT[A/T]TAGGGCATTCTTCTTGTGGAGAGACAATGTTTCACAAAATGATTTTTTTTATTCAA	[A/T]	2L	26141371	rs5729046	I	0	1
AGAMP3_2L_26335027	TTTTCTCCACACCAGTAGTAATCACAAGGAGTACAAACACAGAACACACGGGAGTCGCTC[A/C]ACAGACATGATTGAAAGTGACGACAGGTTGCTTCTTCCTCCTCCGCCAGCGAAATCTCTA	[A/C]	2L	26335027		IG	1	1
SUCC-COA-U-1	AGCGCCCGAGCACGTGATCAAGCTGCTGGAGGATCTGCGCGCCAACCCGCCGTCCGATCC[C/G]GAGTTCGATCTGGCCTCGCTCGATGCCACCCTTGCCCGGCTTCGCGCCACCCAGGGCTAG	[G/C]	2L	26615624	rs5610407		0	0
AGAMP3_2L_26620481	CCTTCACCAGCTTACCCTgaaagagaaggaaaaaaagaagcaaaaaaTACTTCCATTACT[A/G]TCGTTTCTAAGCAGATCTTATGCTTTAAAGTACGCACGGGAATCATCCAGTTGGCCAGAT	[T/C]	2L	26620481			0	0
SuCCCOA1-snp1	CCGCACCCGCARCCGCTCGATGCGCTTCTCGTACGACGGGCCCTTGATGATGCGATGCAC[A/G]AACACGCTCGGCATGTGCACCTGGTCCGGGTCGAGCGAACCGACCGGCACGATCTCCTCC	[T/C]	2L	26620978		S	0	1
SuCCCOA1-snp3	GTACGGCTTGCCGTTGAACAGCTGCATCGGGCGCGGTTCGCTCGCGATCTCGATCGTCCC[A/G]CCCGGGCCGTACTTGATCGGCGAGCCGCCCTCGTGCACGAGCGTACCGTASGCGGTCGGT	[A/G]	2L	26621242		S	0	1
AGAMP3_2L_26698736	GCTTCTTAGAATCCCGTTTTTTGGTGCACGCAACACGCGCCTAACATCGTTTCGAATACC[A/T]TAGCATTTGTGTGTGTCTGTTAAACGTGTATGTGGTCCGTTTGTACATAAAAGTGGGCAG	[T/A]	2L	26698736			1	0
AGAMP3_2L_27058978	CTAGCACTTGCTGCACGCATGTCACCATTGGACGTTCTGCTAATAATGTTAACTTGCACA[A/T]ACAAATCATAGAAAACAAACACACGCCCCCTCTGTTTTAATGCCGCGCGGCTCTCGTCCT	[A/T]	2L	27058978		I	1	1
AGAMP3_2L_27421385	TGGTGATTGCAAAAAGAATAGTATATCAGTGCACCAAGCAGCAGCAGCAGGAATGTCCCG[T/C]GAAGAAGAAGAAGGACACCGTTTGCACCGAATCATCCCGAACCATTTGGCTTCGAAAAGC	[T/C]	2L	27421385			1	0
TROPC-28	GACCGAGTTGAGCAAGGACCAGATGAA[A/G]AGTGAGTGTTATTTATTAATCCTTATTGGCAATGATGATCCATTTTTTTACATGSMCCAA	[A/G]	2L	27817480		S	0	1
TROPC-262	GGAGCTSAAGGAGGTGATGGARGAGTACGATGTGGACGAGTCGGGTCAGATTGAGTTYGA[T/C]GAGTTTCTGGAGCTCGCGTCAAACTTTGTCGAGCCGGARGAAGAYTACGAYGCGYTGCGG	[A/G]	2L	27817714		S	0	0
g12-176	ATTGRAYTGGGWTGCTTTTGCACTGGTTYCGATGCTGTGGTACTGCTGTACTGAGCTGTY[T/C]TAGGCTTGGGAATGATTTCTCTACCAACCRGBCAGTAGCTTTTATACGTCCGCTGCTGTC	[A/G]	2L	27931507			1	0
NICsAO-U-1	GCTGGTGTGATGGTGCTGTCCCGGTTCCTGCATCGAGTGAATGCTCTTGTTGCTTCGACT[T/C]GCGCTCGCATTGTGGTAGAAGCTGCGGTTGCTTTGCGTCTCGAACTGATCGCCAGCGGAG	[A/G]	2L	28508080		IG	0	1
AGAMP3_2L_28509178	GTGCATTAGGAATTAGGCGTTAGGGAATGGGACACACCACGTGTTCATTCATTTTCCATT[A/C]AAATCTCATTTCGTTTGTATGTGCCACGCATCTTGGCAGGATGTGCTGCTTCAGACGCTT	[A/C]	2L	28509178		IGU	0	0
AGAMP3_2L_28514306	AGCGAACCGCGGCGCCATCTCGATGGAAGACGTTGAAAATGCGTTCGGTGGCAATATCTG[T/C]CGCTGTACCGGGTATCGGCCCATACTGGATGCGTTTAAATCGCTGGCAGTCGATGCCGAT	[A/G]	2L	28514306		NS	0	1
AGAMP3_2L_28519760	AAAACTGAGAACCTTTCTTTGGACACTTCGTTAAATACGTTTATACGAAACCATGCACAC[T/C]TGTCCGGTTCTAAGTTCATGTGTCTTGAAGGAGGATGCGGTGCGTGCATCGTGAACGTAT	[A/G]	2L	28519760		S	0	1
NICsAO-2-1	ACARGAGCGTTTGGCACACATGAACGGAAGCCAGTGTGGCTATTGCTCACCCGGCATGGT[T/C]ATGACCATGTACAGCTTGATGAAATCGAAGCAGGGAGCTGTTTCRATGGAGGAYGTTGAG	[T/C]	2L	28520071		S	0	1
AGAMP3_2L_28521907	CTACTTCCCAGACGTGGAGGAGATATTCTGCAGTGGACGCGTACTGTTCCACGGCCAGCC[A/G]GTTGGAGTGATCGTGGCCGAGCGGTTCGATCAAGCAGTACGTGCTGCCAAGCAGGTGAAC	[T/C]	2L	28521907		S	0	0
AGAMP3_2L_28522375	AAAGCTAACGCGTTCCTCTCACATAGCCTGTGCGTGCGCTTTGGCAGCCCATCTTACCCG[A/T]CGACCGGTACGGTTCATCATGACCATTGAGGCCAACATGAGCACGATCGGCAAGCGGTAC	[T/A]	2L	28522375		S	0	1
NICAO-db-snp1	CGTCTCTAATTCTTCCCAAGGACAT[T/C]AAATCCTTTATCGAACAATCAGAACACGGTGTCATCTACTTTTCGATGGGATCCAACCTT	[A/G]	2L	28525353			0	0
NICAO-db-snp2	ACCTTAAACCATCCAAAATGGACAAGCAAAAGCGAAACGACGTCATTAAGGTGCTCTCAA[A/G]TTTTAARCAAAACATCATCTGGAAATGGGACGACGATACACTTGTGGT	[A/G]	2L	28527821			0	0
NICsA0-4-1	WCTCACTCAAATTGCTATATCGMAAATGCTAAGCGTTCCAGAGAATAGTCTAAACGTATC[T/C]GTGCGCCGAATTGGTGGTGGATACGGTGGAAAGGCATCACGTGCTGTTCAGGTCGCCTGT	[A/G]	2L	28531445		S	0	0
NICsA0-4-2	GGCACCCGATTTTATGCAAGGCTATTACGGCAATTGCTACAACAAGGACGTGTGGTSCGT[A/G]GTGTCCAAAACAGCTCTTACCGATTCCGCCAGCAACACGTGGTGCCGTGCGCCGGGATCA	[T/C]	2L	28531754		S	0	1
AGAMP3_2L_28534182	TTAAATACATTTTTCAGTTCAATGATAAACAAAACTGTAAAATAAAACCATTTTTTCCAT[A/G]AAAATGGAACAATAACAAATTGTTTACAAGCTTTTTCTCACACGACGCCTGAAGTGCTGC	[T/C]	2L	28534182			0	0
NICs-AO-5-1	AGCCAGACTGAACGTTTCAGCGACAATCAGACCAACCGGTTGGCCGTGGTAGATGATTTT[A/C]TCGCTGCAGAAAATTTCCTCATCGTGAGGTCCCATGAATCCTTTGAAGTACATGAAATTG	[A/C]	2L	28537291		NS	0	0
AGAMP3_2L_28538317	GAGAAAGCGTGGCATTGCCATCACGCCGATGCGCTACCCGCTCGGGTATTTCGGTTCGAT[T/C]CATGCGCTGGTGTCGATCTACCATACGGACGGCACGGTCGCCATCACGCACGGTGGCATT	[T/C]	2L	28538317		S	0	1
AGAMP3_2L_28541090	GTGATAAATTGCCATCCGTGGTTGTGCGGGAGGGGTTCAATACGCCGGCGAGTTAATAAT[A/G]AGGGAACTGCGCGGTGTGTCTGTGTCCGTAATAGATATACCATCATGCCCAACAGCTCTG	[T/C]	2L	28541090		I	0	1
XDH-586	GATGCTTACGATSCGGGTGCGTGGTTTGGTGGCRAGYACAWACGCCCCGAACAGTTGCCC[A/G]GGCAGRTTCGGCAGGTCATCGGTGTAGTCCGCTTCGCCGGCCGTTTGGGACAGTCCCTCC	[A/G]	2L	28543067		S	0	0
XDH-91	GCGCGCGATCGCAATCTGGCAGATGTCGACCCACTGGGTCGAGCTGTACACGTCCATSCC[A/G]TCGTCGATCGGTACGCACACGCACTGYTGCGTYTCCATCGACAGATGGTACTGGCTCGGC	[T/C]	2L	28543622		S	0	1
NICS_AO-D-1	AAAGGTAACCTGCTCAACCGGCTCGTTCAAACTGCAGCCAGAATCTTGATAGAAACGGTT[T/C]AGCAATCGCTCCACACGGCCACGCTCGTCCACCTCGATCTCGTASCGACTGACGCACGCC	[A/G]	2L	28543928		S	0	1
AGAMP3_2L_28545080	CTTTGTACTGCGGTCGAAAACGACCGGTGAGCCAGCGCTCAACATGACCGTGTCGTTGCT[A/G]TTTGCTCTGCGCATGGCACTGAACTCGGCACGCAAGCAGGCCGGTCTGCCCGATGAGTGG	[T/C]	2L	28545080		S	0	1
AGAMP3_2L_28546824	TATCGCCCGCCGGAACAACTGTCTCGATTGGCTCGATACCATATGGTAATGGACCGAGCA[A/G]CCACCGGCACTCTCACCGAACAGCGTCACATTGTCGGGATCGCCACCGAACTGTGCGATG	[T/C]	2L	28546824		S	0	0
COEAE2G-snp1	CAAGCATGCTGCAGGATCCGCGACTGTTYGTAGGCAATGTTCCCTTCCATCTCAAGCTTA[A/G]CCTAGARCAGCGKATGGCTTTCGGGGAGCAGCTGAARCAACTCTACTATCCMGATTCYAA	[A/G]	2L	28550135		NS	0	0
COEAE2G-snp3	RCTGGTGAAGATATCSACCAAGTGCTGGATGGCACGGTACTCGAGCGTGCTCTTGTCCAG[T/C]GGTTTCGCGAAGATGTTYGAAAACAGGTAAGAAATTTCATCCGCATGAGACGTCCCACGT	[T/C]	2L	28550442			0	0
COEAE2G-snp2	GACGGCCGTCCAYGACAGACTGGCGGTGCTATCACAGTTGGGATCGCTGTTGGTGGCAAA[A/G]CTGGTGAAGATATCSACCAAGTGCTGGATGGCACGGTACTCGAGCGTGCTCTTGTCCAGY	[A/G]	2L	28550502			0	0
AGAMP3_2L_28605458	ATCGGCTGGCACTCACCTGATAAGCCATCGTCGTCTAGATTTCTATCTTCGCTCAAACAC[A/T]CAAACACTCCAGAATGGGAATAATAACTTAATCACGTACAGATAAAACGAACGCGAACAA	[A/T]	2L	28605458		5UTR	0	1
Nut2-1	ACRTTCTCGATGAACATTTCCAGATGATTTTCCAGRTTTTCCAACGGCGAAGTCATCTTG[A/C]AGGGGGAAATATTTTCGGAGACGCAGCAGAAAAAAAGGGAACCGTACGACCGCGGGTGGA	[A/C]	2L	28609409			0	0
Nut2-D-1	CTTTTAYTGAACTTTAGGTGTTAGTTTTTCCCTATTCCTGTGATCTTTCAGAAACGGTGT[A/G]TCGARTTTTTCCCTGCATCTGGGAATAGTTTTCCAAGACACCGGGWTGTTTGTTTACATT	[A/G]	2L	28614912			0	0
ARREST-208-rs5671325	GTCGTGACGAACAACTCGCGCAAGACTGTCAAGAGCATCAAGTGCTTCGT[T/G]GTGCAGCACTGTGAGGTTAGTWGTGATGGAGCATTCCTGGGAGGGGGCACCT	[T/G]	2L	28772578	rs5671325	S	1	1
AGAMP3_2L_29323446	GAGCAGACAGGGTGGAATAAAAACGAAATGAAACGAATCGAATTTCATTGAGCAAAATCA[T/C]TGGATATTATTTAAATCATCGGTGGTGCCGCTCGGAGGGGAATTCGTTTCAATTGCATCG	[T/C]	2L	29323446		IG	1	1
AGAMP3_2L_29690042	TGTGTTCTGGACGTGGTGCTATCTGCCGGGGTGTGTACGGGTCAGTAAGCCGTACATAAT[A/G]GGCAGATAATGGTTAGTGGTAAAAGGGTAAGCGCAATGTTAGGAAGGTTTTTATTCAAAA	[A/G]	2L	29690042		IG	1	1
LRRTLR-U-1	GGTCGAGATTACAAAGCAGCCATCTAATGAACTACTGGCGAGAAAGTGGGAACCAACAGC[A/C]GGGCGCTCAGAACGGTGCAAATTGATTTGAATATTTTATTTCGGAAAAGAAAATGACATT	[A/C]	2L	30325359	rs5627536	I	1	1
AGAMP3_2L_30327385	CAGACACAGCTATCGTTCCACTCACACACACCCAAACACCAAATGCCCCCTCGCAAACCG[T/C]TCGAAATCAATTATTGTGATTGCAGAAGAACGGCACCGCAATTACAAACCTGTTGTAAGC	[T/C]	2L	30327385		I	1	1
AGAMP3_2L_30497095	CTTACCAATTTTCCACTAACAAAACCAATTGAGAAAAAGCATTCGAATGGGGTTTCCCCC[A/T]TGGCGTGCAGCAAGCTTTGCAAAAGTGGGTTTCCAGTGCTGCTGCAGCCTTCGCACGAGT	[A/T]	2L	30497095			0	0
AGAMP3_2L_30501105	AATGTATACAATACCAAGCATCCGATCTCCGGAATAAGAATAAAAAGCCAAAGCTGATGA[A/G]TGTCCGAAACATTGAAATACAACAGGTTTGCATAGGCCTGGAATCAACTAAGGAGCCTGT	[T/C]	2L	30501105			0	0
AGAMP3_2L_30502233	TTGCTTTGCCTCCTTCGATGCGTTCGTTCAGCGATGTATGTACCGGCCCGTCGATGGAGC[A/G]GCACTCGCCGTGGGTAGGGCACTGTTCGGATTGGCCATGCTCATCGACATACCGGAGGAG	[T/C]	2L	30502233			0	0
AGAMP3_2L_30519999	TCTAAAGAAATACAGTTGGTGGTAAAAGGTGAGTAGAGGAGATAGTAAAAAACAAGAAAG[A/G]GGGAAAAAACAGTGGCACAGCACAGGTTCAGGTACTAGGTGGGTTGCAGCGCAGAAGGAA	[T/C]	2L	30519999			0	0
AGAMP3_2L_30881715	ttttgtttttttGCTTCTTCAAACTCTTACGAAGAGGGGAAACACATTAACGCAGCGCAT[A/G]AAATATCAACGATCCGATCAAAAGTGGGAATCGTCCAGTTTGTTGCTGTCTCCATAAGGG	[A/G]	2L	30881715		IG	1	1
AGAMP3_2L_31250130	AGTAATGGAAAAAATGAAACAGTATGACAGGTGGCCAACGATGACGCTCTCCTTATGACG[A/G]CGAACGATGATCATCATCAAACCTTTTTATCCGGCAGCAGGTCTGAAAAGGGCTGCAGGC	[A/G]	2L	31250130		IG	1	1
AGAMP3_2L_31630019	GGTGGTGGTTTCCCATTTCTCATTATTATTTTTTCGTTTAATATGTAAAGCAATCAATCG[A/C]AGCACATGCTAATGAGGGAGCAGGATAATCCACCCGAAGTCAATATTATTAATAGGGGAA	[T/G]	2L	31630019		IG	1	0
AGAMP3_2L_31997214	AGATGAGCGGGAAGGCCGCTCGATTCGATTGTGCACAACACAATCCAGACAGCGCGCAGA[T/G]CATCGCGAAAAGAATCAATTGTatttttgggggatttggttttatgtggtgtgttttttt	[T/G]	2L	31997214			1	0
AGAMP3_2L_32362341	GTGTGTAAACAAAGACACCTTTGACAGAATAGACCGTCGCGACAGGTAGCAATGAAGTTT[T/G]GTTGATTTGGCGGTTTGTTTGCCATTTCAAAAAATACCTGTTGCAGTTGGAAGAtttttt	[A/C]	2L	32362341		IG	1	1
AGAMP3_2L_32737141	CTTTTATTTCCAATTTaaacaaacaaacaaacaaacaaaacaaaaaaaGCGTATTCTCTC[A/G]GTTTGGGTTTTGCTTTAAATTAGGTTGTTGCCCTCCTGTTGGTACAAATCGtttaaacgc	[T/C]	2L	32737141		IG	1	0
AGAMP3_2L_33110480	TACTCGGCGTCCGCTACATACCGCAGCGCATCGAGTTCAACTACGTGAAGCGGGTGTGAA[T/C]GATCGGACCCCAATAAACAGAGCCCAATTGAATTGATTTAGCGTGCaaaaaaaaCACAAC	[T/C]	2L	33110480		IG	1	1
AGAMP3_2L_33473193	GCGATGAAAAAGACGCATCCGCAGCATCCACCGAGAAAAAACTGGTTCGTTGTTGCCCTC[T/C]CCAAGTGCAAGacacagagcgcacacaagcacacacacacacCTTTTTACTGATTCATCG	[T/C]	2L	33473193			1	0
AGAMP3_2L_33833210	TGCGTCTCCAAAGGGGTAAAATAAGGGTTTGTTTACGTTACGTTGTCTAGCAAAAAGGGG[A/G]GCTTTGGGTTCCATAAACTGACCTGCACGTAGCCCCGTTCGATGAAGCAGACATGCCTTC	[T/C]	2L	33833210		IG	1	0
AGAMP3_2L_34203702	ATTACTGGTATAAAAATACATCCATTAATATGCTAAGTAACTACAACGCATACAGTTAAG[A/T]GTGTTTAGTTGGAGAGTTATTTCGCGTCGCACAGACGGACGACACAACGAGTACAACATT	[T/A]	2L	34203702		IG	1	1
AGAMP3_2L_34567049	GGCCATATCTGGGCACTGTCATCGGTTGTCTCCAGTGATCTTTTGAGATCTTTCTCATGC[T/C]CTATGTGTGCTCTACGGCAACCAAGAAAAGTGGATAGCTTAGTGGAACTGCTTAAAATTC	[A/G]	2L	34567049		IG	1	1
AGAMP3_2L_34933639	CCCAGCGCTTTTTTTGTTTCGTATGCTGTAACTAAACTTGTACCGCAATTTACCGAACAA[C/G]GGACACACACACAACAGGGTGTGGTACTTTGCTTATCCTTTATTTCATCTTTTGCATACT	[G/C]	2L	34933639			1	0
AGAMP3_2L_35301705	TTAAACCCCTGGACAACCTGGGGCGGCAGTAGTGTAATGAATGCGTTTCCCCTTTCTATT[T/G]AGGGGGACTGTACtttttgtttttttgtttattttGAATGGAAGGAAGAGTAGTGTTGGC	[T/G]	2L	35301705		IG	1	1
AGAMP3_2L_35664272	CTCGCAGGACCAAATCTCCGAGCAGCTGGAGTCGCGCATCCGCTCCCACGACAAAGACAT[T/C]GAGCGTATCTGCAACCTGTACTATCAGGGCTTTATCGATTCGATCCGCGAGCTGCTGCTG	[T/C]	2L	35664272		S	1	1
AGAMP3_2L_36061582	AGCAAGCGAGTAGACGCAAAAGACCGTTAGCAGCTCAGTATGAAACGAAGCAGAAGCACC[A/C]GAAAGCATCGAGCCTTGATTGTCCCTTCAacacactcacacacacgcacacgtacacaGG	[T/G]	2L	36061582		I	1	1
AGAMP3_2L_36436558	TGCACAGGAAAAAATGTAAACAAGTGCGATGGAAAACGTAAACACCGCATGCTTCGGCAC[A/G]GGTGAGCTGTCAAAAACAGCTGACgtttgctttttcccgtgatttcttttttttcttttt	[A/G]	2L	36436558		IG	1	1
HAIRY-356	AAGGCGATGCTACCGTTCGGGAGCTTGGTGGGGATGAGCTGCACGTTCGA[A/G]CCGGCCATGTAAACGCCACCRTTGCCRGCCTGRAYGGCACTRAGCGGRCC	[T/C]	2L	36907066		NS	1	1
COEAE80-1	GCGGGACGACCCGGAACCGCTGCCGGTGATGGTGTTCATCCACGGCGGCGGGCTGATCGG[T/C]GGCCACGGCGACAGTTCGCTCTATCTGCCCAACTATCTCGTCCAGGAGGGCGTGATTGTG	[A/G]	2L	36951803	rs5460734		0	0
AGAMP3_2L_36952245	ttgttgttgttgttgttgttgttgttgttCTCCGGATCTTCCAGCTCGCTCACTCACCAT[A/G]TGCTTCTCAGCATCGGAACCGGTGCTGACGTTCTTCCATCCCATCAGTGGTGCACTTCGC	[A/G]	2L	36952245		IG	0	1
AGAMP3_2L_36952710	AGCAGAGCGAGAGGCCAACGGTTTATTTGCAATGCCAAGCGAACCCGTCGGGGTAAAACC[A/G]AGCTTCGGGTTCGATTGATTTATTGAACCCCTTTTTGCCAAAAACGCCCAGTCAGTCCCA	[A/G]	2L	36952710			0	0
AGAMP3_2L_36956169	AAAATCCCAACACTCCCGGACGGATGTTGCGAGAGTGGGCCAAAGCCCATGGGCTCAAAC[T/C]ATTCGCTCATAAACCCGTTACAGCCCGTTAGGAATTTGCAAATAGCAACACTTCCTCGCA	[T/C]	2L	36956169		IGU	0	0
AGAMP3_2L_37278369	CGGTGCGTTAAGGCATTGAATTCATTCTCACCATCAAAAATAAAAGGGATGCCCCTTCTG[A/T]GCTCGCTCCTGTGTCTTCCTCCACCAGCCTGTTAAACATATCGGGCACACTCTTTATTGA	[T/A]	2L	37278369		I	0	1
COEAE1H-snp4	CGTGCGGGCTTTYTTKGTTTCTCATTTCCAGCGCTTAGCACTTCAGTGGATCCGTCAGAA[T/C]GTCTCCACATTTGGTGGCGATCCGAACAATGTCACACTGTTCGGTGCAAGCTCCGGTGGC	[A/G]	2L	37283493			0	0
COEAE1H-snp3	CCGCACGATKTAAGATAACTACACAATTGCYTCAGAATTACATCCTACCTGATCCTTCAA[T/G]CCAGCATTTCCTTCTATACCCGCTTGCGGTAGACAGAGGAAYCCAAGCACACCGAGTCKA	[A/C]	2L	37283607		I	0	1
COEAE1H-snp2	TCTGGACTGTAGCCGCGAGCGGAGCAGCTGCCTGGGAAGGGATGTGATCACGCGCGAGAT[T/C]ACCGGTTCCGAGGATGGACTGTTTGTGAACGTGTACACGCCGGCCCTGGGCAGRGAGGTC	[T/C]	2L	37283865		S	0	0
COEAE1H-snp1	GCTCCGCTCGCGGCTACAGTCCAGATAGGAYACCGGGTAGCGATCGATCGGCTCGGGAGA[A/G]GCGAAGCGTAGCTTCCCTACCGGTGGCTTAGCGTACGGTATGCCTTTGAA	[A/G]	2L	37283961		I	0	1
COEAE2H-1	KGGRCAAAACACCGATCCCGACTGGCAAATCGCTTTGTGGAAGTATTGGCGCGACTTCGG[A/G]CASAGATAGTGCCAGTTAACCGACGCACTGCCAGCACTCTCCCCAAACARGGTCACGTTC	[A/G]	2L	37287159		NS	0	1
COEAE3H-snp1	CTCATATGCCAGTCCGGGGTGGCGACT[A/G]CGTCGATCACCTTTCAGAAGCATCCGGAGCAGAAAGCGCGCCGTCTKGCGGAGYATTTCG	[A/G]	2L	37289909			0	0
COEAE4H-1	GCAGGCGGGCCAGTTTGCGTGCCCGGTCGGCCGGTTCGCGCTGCCACAGCCACTCGTTAA[A/G]CGCGGTGCCACTTTGGGCGATCGCACGRTGGAAATACGCCCGCGACGCCTCRCTSAGATA	[T/C]	2L	37291753			0	0
AGAMP3_2L_37292149	GTGAAGGAAAAGCTGCCCCTGTTCCAAACCGACCCGACGAGGCTGATCCCAGCCACGCTC[A/G]CTGTGGGCAGCGAGGAGCAGGAGCGGAGCGCGTGTGAAGCGATTCAGAAGTTTTTCTTCC	[A/G]	2L	37292149			0	0
COEAE5H-1	GGCCAACGATGAGAGTCTTCCCTTCCGCTGGCAGCCGGTAGACAAAATCGCCCCAAGCGC[A/T]GCCAGYGAATCGTTCCGGTTGCAGTGTTTAGATATAGCGGCAGAMCCGAAAATGATCACC	[T/A]	2L	37293185			0	0
AGAMP3_2L_37294650	CACGTTCAGATGCAGACAGTCTTCCGATCCTTCCAGCTCCTGGGTGAACATGTTTCTGCT[A/G]AAGCAAACGTCCCGCTCGACACTGCAGTCCAGCACCGGGTAGGGGAATCGGTCCAGCGGC	[T/C]	2L	37294650		I	0	1
AGAMP3_2L_37295981	CAGAAACACTAGGAACATACAAAGGTGTTAAAATATACTTCGAATCAACCAAAAAGATAA[T/C]TTAAACCTGATTTACATGTTTCCAATGTTTGCAATCTGCAGCACGAATGAACTGCAATCA	[A/G]	2L	37295981			0	0
COEAE6H-1	GGCACTTTCRCCAAACAGCGTCACATTGTGCGGATCACCGTTGAAGTGAGCGATGTTGTC[A/G]GCAACCCAGCGTAGGACGAGCAGCTGATCGTGRAGCGCCGCATTRCCCTCGATGCCCTGC	[T/C]	2L	37296985		S	0	1
AGAMP3_2L_37297747	CCGGTACCAGCACCGGTCGCAACTGTTCTTCTATCGGTTCGAGTACGATGGAGAGTTGAA[T/C]CAGTACAAGAAGTTTCTGCCCTTCCCGATTGCCGGAGCCTACCATGCCGACGAGCTGGGA	[T/C]	2L	37297747		NS	0	1
AGAMP3_2L_37305262	TAGAGAACAAATTCTGGCAGGTGTTTTTGATCTGATCGAACGTGTTGGTACAGTTTTTGG[A/T]GCCATTCCGATAGAAGCTGCCGTACCGGGATGAGCCACCGGATGCCGACTCCGTGTTGGA	[T/A]	2L	37305262		I	0	1
AGAMP3_2L_37541199	TGGCCAAACATTCGGATAgaaaaagccaaaaaggcgaaaataaaaaTCGCAACCTCAACC[A/G]TTCTTCACCGCAGACAAACGGATTGTTTGGGTTTTTGAATTCCTTTTGTGCCTGGGCTGC	[T/C]	2L	37541199		IG	1	1
AGAMP3_2L_37902583	CGCGAATTTCGTGCCtgtgtgtgtgtgtgtgtgtgtgtgtggggtgtgtgGTCAACTGGG[A/G]CGATAAATAATTCCACGAACTACCGCGTTTGTGCGTTGGCCAATAACaaaaaaaaaGTTC	[A/G]	2L	37902583		5UTR	1	0
AGAMP3_2L_38271086	CGttttttttATTCTCTCCTAACAACAGGCGCATCAGAGATGTAAGCAATAAATCACAGT[T/C]TCAAATTGTGCTAAATAGATTGTTGCCAAAAAGGTTCATTATGGTTCCGGTGAGTGCTTG	[A/G]	2L	38271086		IG	1	1
AGAMP3_2L_38314075	GGTACGACCGCAAGCGCAGTACACAACAAGCACGGTTAACTACCACGAACATTTCCCTCT[T/G]TAGCAGTCAACAGTGACGCCGACCGGCCCAGGTCCTGTTGATCATCACCGGGACCACCGG	[A/C]	2L	38314075		IG	1	1
AGAMP3_2L_38323569	AACCTAATGGCTGGGGATTGAAGGCATCTAAAATTATGATACGTGAAATGTTGTAAATGG[T/C]ACTACCACGGAAATGGtaaataaataataaataaacaataaataataaaaataataataa	[T/C]	2L	38323569			1	0
AGAMP3_2L_38329174	GCAAAGGGTTGTGTCCTCCCATGCACCACCGTCGCCAGTCGATTGGCCACATACGGTAGC[A/G]TCAGACACGTACGTACGTTTCACTTAAAGGAACACACAAGGATGATTGTCCCTTCGTACG	[A/G]	2L	38329174		IG	1	1
AGAMP3_2L_38637894	ACAACCACACACTGTTTCTGCTGCTGCTGCTGCTGTACAAGGTTTTAAACTGGTGAATCG[T/C]ACGGCTGGGAATAGCATTCTACATACCcacacacacacacacacTCGATATATTCCATTT	[A/G]	2L	38637894		I	1	0
AGAMP3_2L_39016142	TTGAACCACTTGCCAACTGCTCAAACTCTTAAAAAGAACGATAAATTGTTCTCAAATTTG[C/G]TATTGATCGGGATTGGAAGCGCTTGTGCAAAATTCAAACaaaaaaaaaaTCACATCCTCA	[C/G]	2L	39016142		IG	1	1
AGAMP3_2L_39385447	gcgagagagagagagagtcagaaagagagaaagattgagagTAGCATACGGTTTGTTGTG[A/C]GGAAATGATTTGCCTGCGTTGTGTTGGAAGCATAAATGAGATGAACAACCCCACGGGCCG	[T/G]	2L	39385447		IG	1	1
AGAMP3_2L_39754802	gtgtgCCCATGGCTGAGCTGTACGTGTGACGAGTCGCTGGTCTGCTCGGGGACTTTTCCC[A/G]TTACAAGAGACAGGGACttttttttCTTTGCTCGTGCGATGGCGGTGATGGAGAAAATGC	[A/G]	2L	39754802		IG	1	1
AGAMP3_2L_39892865	CGACCAAACGCACAATCGGACGTTTCACGTCGCCGACGGCGACACGGTGACAACCGAGTT[T/C]ATGCGCCAGATGGATCTGTACGACTACACCGTTCACGAGCAGCTCGGGGCGGAAGTGCTC	[T/C]	2L	39892865			1	0
AGAMP3_2L_39903059	TCGTCCTGCGGCGGGTTTGATTGGTTTATTGGATTTGTCCCTACACGGGATCGATGATAC[A/C]GGAGGTCATCCAGCTCAATCCAGTGGGGATGGGAGGAGTAAAAAAGGGCTTACAAAAATC	[A/C]	2L	39903059		IG	1	1
AGAMP3_2L_39904402	TTTGCAACTTTATTTGCATACTGCAATTCATGGCAAACACGATCGTGCTGCACCCGAGCT[A/G]AGCTGCTGCTTTCGCAATTAAAATGGTGTTCGTGTGCGTTTTGTTGTTTGGTGCCGTCCG	[A/G]	2L	39904402		IG	1	1
AGAMP3_2L_40081753	CCCCGTGGAGACGGTGGTTTGGGGAGCTTCGTTAGCAATGCCATGCTTGGCTGAGGCGAG[T/C]GCTTCTTGCAGCTTCTGCTGGTTTGCCAACACCAGATTGCTGTATGAGTGAAACGCTTGT	[T/C]	2L	40081753		IG	0	1
AGAMP3_2L_40082535	ACTGCTGCTCGAATGGTGCTCGATTGGTGCAGCATGCATGGAATTTAGCCGTTGCTACCC[A/G]CTGAACAATAGTGATGGGCAAATAACCATCGTTCTCGGAGTCGAATCCGATATCGGATCT	[T/C]	2L	40082535		IG	0	1
AGAMP3_2L_40142288	TGCGGTGGATACAATTGTTTCCTCTACTTTACAAACCATGTAACACCGAACAATAAAACG[T/C]TTTTGGAGCTGTTTGCAAATGTGCATAAGTTGCTACACAGGAGAGACACGGGGTTGTTGC	[A/G]	2L	40142288		IG	1	1
AGAMP3_2L_40235574	ACACTTACCTAACTCGAGCAAGCCCATGAAGACGATTGCTATTATAATTGACATTTTGGC[T/C]TCATTCTGCAGTGAGTGTATTTCGGCAAGCAAACCGACTGCCGTGTCGCGTAGTACTGCC	[A/G]	2L	40235574		IG	0	1
AGAMP3_2L_40241362	GCTACCGGTAGAGCGTACGGTGGATAGAGTGACACACTTTTACGTTGAACATTGAACCCG[T/C]CGTACCTTCCAACGAGCCGAAAACGAACGTTGGCCGACTACTCCGCAAGCCAAACGTGGC	[A/G]	2L	40241362			0	0
AGAMP3_2L_40245044	ACCGAGAAGCTGGTTGGGATGTGTTAAAATAAAAACCCGCCAGAAAACCGATGTGTTAAT[A/G]CCAGAGTAAATAAAACCTTCGGGATTCTCACCTTCTGATTGGATCGAATGCTCGATTTGA	[A/G]	2L	40245044			0	0
AGAMP3_2L_40251220	GGCGACCGCCTTCGGGTGCTTCCGTCGGCCGACCACAAAGCTGATGGATTGCTTGCGGCG[A/G]GTCGACGCGCAGATCCTGGCCGAGAACTCGCCCCCCATCGACTGGGGCCCGGTCATCGAC	[T/C]	2L	40251220			0	0
AGAMP3_2L_40251871	CCTCGCCGACCAGATGCAGTGGGACAGTGCGGACAAGCGGGTGGCCGACATCGTGATGAC[A/G]CTGTGGGCCAACTTTGCCAAGTTCACCAACCCGACGCAGGTGGGCGTGTACATCCGGTGG	[A/G]	2L	40251871		IG	0	1
AGAMP3_2L_40253096	AGCACAAGCAGAACATGGAAATATTTCGCAAGATCGAGAACAAAATGATCGAGAGCGGCT[A/T]TCCGTACAAAAACTACATGCAGATCGGTGTGCGGTGGAAGAATTTGAAAAACCTCTACAC	[T/A]	2L	40253096		IG	0	1
AGAMP3_2L_40530157	cacacacacacacacgtgcacGATTATCCTATTGTTTTAACATTTGTTTTTTTACATTTA[A/T]ATTCTAACAAGTGCACGCAAAAAACGGCCATCCACTTCGCGTTCTAGAGTGCCATTAGTG	[T/A]	2L	40530157			1	0
AGAMP3_2L_40914000	TTCATTCTGTTTCTAACCGTACACCAAGCTGGTTGACTTCACTTCTTCCAATATTATGCA[T/C]TTTATTCGATTCGCTTGTTCTTAAGGGGCCGTGTGTGtctctctctctttttctctgact	[A/G]	2L	40914000			1	0
AGAMP3_2L_40997236	CATCAAGGAGAACGATCTGATCAATCTGCAGCTGATCGGGGACTTTAGCTACGCCTGGCG[C/G]CTGATCGACGGCTACACCGCGATGATGCAGGAAAACATACGCCACCAGCCCCGGCTGGTG	[C/G]	2L	40997236		S	0	1
tpx5-snp2	CCCTTCCCGATCATTGACGATTCRAAGCGCGAGCTGGCGRTCAAGCTGAACATGCTGGAC[A/C]GGGACGAGATAGGATCGGCGGGTCTTCCCCTAACCTGCCGCGCTGTGTTTGTGATCGATG	[T/G]	2L	40999885		IG	0	1
tpx5-snp4	GGACAGGGCAATCGGTTTCACATTGCGCTTGGTGAACTCGGGCACCAGCTTGGCCACCGC[T/C]GCCAGTTCCGTCGTGCAGACGGGCGTGTAGTCGGCGGGGTGCGAAAACAGGATTGCCCAG	[T/C]	2L	41000084			0	0
TPX5-D-116	GTCGATCGTGGTCGACTGTCTGTGCGACCATCGGCAGAGCTACTGGACGTTTCACAACCG[C/G]TCCGGGGAGGATTTTAACGAYGCGCACCATCTGTTTACGGTGGTGCAGAATTACAAGTGC	[C/G]	2L	41004527		IG	0	1
AGAMP3_2L_41263469	TATCTCGCCGCGGGCCATCTCGAGGGACAGTTTCGCACCGAACACGAGCAGCACCAGCGG[T/C]ACCCACCGGTGCAGTACGCCCGATCGCCGTTGGTCCACCAAGTACGGCTGCATCGCTTCA	[A/G]	2L	41263469		I	1	1
LRR2-1	CTGTGCGCGTTACGYAATTTATGGATGGACGTYGTAGATCATCAATCAGAGCTGAGC[A/G]CAAACGGTGGTCYGAGCYGGTACTTGCCGGTCTTCGTCTYACCGTACCGGCGCAMTGRCT	[A/G]	2L	41264925			1	0
LRR-snp1	CGTCCAGATAGTTCCGCGCAATGTCGAGCGTTTCCAGCTTGTTCAGCGACTGCAGCTGCG[A/T]CATGTTGAACGTGCTGATCATGTTCGCGCTCAGGTTGAGCTCGCGCAGCATCGGGCACAG	[T/A]	2L	41275407	rs5373922	I	1	1
LRR-381	TCCATGTAGAGCAGGCGCAGATGSCCMAGCCCATCGAACGCGTGCTCCTC[T/C]AGCTGCTTGATYGTGTTGTTGTACAGCGACAGTATCTCGAGCTGCAGCGC	[T/C]	2L	41275630		I	1	1
AGAMP3_2L_41297308	GGGTCCGAGGATAATTACTAATTAATTTTTAATTAACATACAACTCAGCACAAATCCAGC[C/G]GGCTGTAAAGATCAGTCAAGCTTGGTCATAGTCTAGGttttttttttCTTCTTCTTCTCT	[C/G]	2L	41297308		IG	1	1
AGAMP3_2L_41696941	TTATTCTCCACTTCCATTATAATTTCATCAAACCGAGTACCGAGCGAGGAGCGGAGTTTG[T/C]GACCTGCTCTTAAGTTTATTGCTGCTTCGTTGAGTGCGTGTGCTTGtttttttttttttt	[T/C]	2L	41696941		IG	1	1
AGAMP3_2L_42078004	AAACAAAGCAGTACACAAACCACACGCAACaaaaaaaaaCCCTCTGCTCCAATGAGATGA[T/G]GGAGTTTGAAACGGTGTAGAAACGGGCGACGCTCGCGATAAATGTTCAACTGTCCTGAAG	[T/G]	2L	42078004		I	1	1
VGSC-3-176	CACAAAGTGCCAACGGTGTCGTGAGCCTCGGSACGACGACGGCWGGGGSRACGATCAGCACCATMCCGATCGTRTTCCGRCGCAAGAACGACTTCCACAGCAGYTTCGATCGCATCAAGCGGCTGAGCTTGATCGAGCGTGTTGAGGAGGCAAAAGATGAAGAGGAACATCAGAC[A/C]CAGCCACTGCCGAAGGTGTCGAGCGAGAAGTTGCCGCGCAAGCATCTCTCCAAGGATCGGCTGGAAACGYTATCGCTCAAGAGTAGCTACAGCGTGGAAAACACGAACCASGCGCTAATGGAAGGCACTCGGCAGCTTGGGATCAGCATCCAGGAGTTTCAGCGAACRATYGGCCAGGAGGCGGGATCGGTACCGGCGGGAGCRGATWYGGCACCCGGW…	[T/G]	2L	42398244		IG	1	1
VGSC-4-429	TTCCAGATGCGCGTCGACGACACAATCTCCAGCTCCTTYCGCGTYGGGAACTGCTTYTTGAACTTCTGGTCCATCTGGTCCTGCAGCTGCTTGAAGTTGTCCGTCTCCTCCACGTGCCCCAGCACATGCTTCACCAGCGCGTGCAGTATGTCCAGACAGTGGATCTTGTTGCCCTTGGAAATGGGCAGATTGAACGACACCAGCGCGACCGTGTTCGGTTTCGGGATGCCAAGCGGTGGATCCAGAGACGCAATAAAGTCCGACAGCTGRTTGAAGTGTATGAACTGGCCTGCGTGCGGGTCGTACTTCGACCAGCGRATGTAGAACATCTCCAGATCGTCCTCCACGATGCCRATCTCCTCCTCCTGGTGGGCCTGGTTGAAGTTCTCCAGRATGATG…	[T/C]	2L	42404009		NS	1	1
VGSC-D-1	GAGAACCCCTACTAGCGAACTATTAATTAATGGCATTTTTTTGTTATATTAACTTTCCTTAACTATTTGCTATTTTTGAAGCGTATTTATTGACGCAAAACACAATGCGTTTGCGTGTTCGTGTCATTGCCATCTATTAGCTGCAGATAACATGGGGCAAGAATCTTTGATGATGCGTTTGCTTTTCTGCTCSAATAGAAGCAGAATCAAGYAGTAGAAGAACAATTAATTGACATTTTGTTAGCTCAAAAACTATGAAAAAACTGTTTTATTATTACTKTKAATGAAAACGCAAGCAATTTATA[A/T]GTATATTTACAGCTGAGGTGTTGTGCAGGTAGATAATTACGTACCTTTGCAGATTAGAAATGTATTTAATMATTCAGAATCATTCAGTT…	[T/A]	2L	42410465		IG	1	1
db5426867	ATCGAAATTGCTGCCGAGTAGCTGACTATAGGGCATTGCTAAAATGTGCCACGGCCCGTA[A/G]TTGCAGGTGCAATACACACACAGCAACCATAGGAGAACGTTTTCGCGTTGTGCCTA	[A/G]	2L	43038989	rs5426867		0	0
AGAMP3_2L_43041547	AATGCCGATGCCGTGTATCAGCTCGTTCTGGCGCATCAGCGGTATGTTGATGCAGTTGGC[T/C]GCCGCCACCGCCACAAACGGAACGTATCGCTGGAACAATGGTGTGGCCCGCTTCTGCAGG	[A/G]	2L	43041547			0	0
db5369729	AAAACACAATTATTATCTTTGTAGCGCAAATAATCTTGCATATCTCGGTCTCTCCATGGT[G/T]TGTATGTCTCAACCGGTATGCTACCTACTCGTAGCCTCGTTTTRCAACTCATCGTG	[T/G]	2L	43047894	rs5369729	NS	0	1
AGAMP3_2L_43048546	cacacacaTTTCCAAGTACTGTACTGTTAAGTGGATGAAAGTGTTTGAATGAATGCGAGT[C/G]AGGAGTGCATGTAGTAAAGCAAAAAACAGAAATGGCATGTGTGGGAAAACAAACATCGCA	[C/G]	2L	43048546		3UTR	0	0
db5734208	CACGGGTTTTCTCCCTGGCGCTCTGAAATCCTACCTTAATGCTTGTATGTGTGTGTACGC[A/T]CCTGTTCACCCCAAAACGCCATTGGAAAACGTTTGGTTTTGTATGAAGGCTTTTGC	[A/T]	2L	43048890	rs5734208	3UTR	0	0
AGAMP3_2L_43049761	AAATGTTTTATATTGTGTTAAAAAACGTAGCTTCCGGGGCGTGATAGAAGAGTCACCACA[T/C]ACACAAGCGTTCATGttttttttATTCTTATCTGTATGGGGAAAAGGTGTTTAATTGCTG	[T/C]	2L	43049761		3UTR	0	1
CYTB5-snp1	GGCAGCGTCGCCATCGTGCGCAAGACGCTGCCCACGATAACCACTGTGACCTTCCGTCCA[T/G]AAGCCATCAATCGCTCGACGATCGCTGATCCAGTGCGATTTTCGATTGACGT	[A/C]	2L	43054142		IGU	0	0
AGAMP3_2L_44241499	GTTTGCCTTTGCCGGCTTCTTTCCCCGCGCAGTTAAAAAACACTCACTAAATCCACACCG[A/G]CCGAAAACAGTCAGATTTCATCTGCAAATCTGAGGTCGTGGTGGTCGGTTGTTGTATCAC	[T/C]	2L	44241499		IG	1	1
DEF3-171	TTCCTTTCCATCTCCAACTGCATCCAACCAGCTCACTACCAGCTSCTCCA[T/C]CATGATCTTAAGCCATCGAACAAACACACTCGTCCTTAGCGTTACAAGAT	[A/G]	2L	44247295			1	0
DEF3-391	AAGCAGGGCCACCAACAGGAAGGATACTACGGCGAATTTCATCTTGGATG[T/C]TGCTCTGCGAYTTCTGCGTAATTGACTGTCCGCGAAGMTATCTCTACACA	[T/C]	2L	44247515		IGD	1	0
AGAMP3_2L_44264434	CTGCTCTTGTAAGCCAATCAAAATGAATTTACTCTGAGGTTAGCTCTGAGGTGACTCGTG[T/C]GACACAGTTATTGCTTTCTTGCGACAGTTAATGCTACTCACATGTCAGGTTAATACTTCT	[T/C]	2L	44264434			0	0
PX12-U-1	CAGTTTTCCNTACAAGAAGCGACAACTCYGATAAGAACAATGCAACAACAACTGATCCTA[T/C]GCTACCTACCTCTACAACGCACCGATGCTTTGTTTACTTATTTTTGCGTATCGCATTTGG	[A/G]	2L	44264980		IG	0	1
AGAMP3_2L_44266973	CCCTGCGGAATGGATCAGGATGCGCAGAATCAGTTGCGACACCAATGACGCAAAACCAGA[T/G]CACAAACATGCGCGAATTATGTCCGAATTTGGGGAGGAAGAGAGAAGGAGGTGGGTAAAC	[T/G]	2L	44266973		IG	0	1
AGAMP3_2L_44467703	CGTCGTCCGTGCGCGTGCAGTGCGAGTGCGTGTTAGTGCGTCGCGTGAAAGGTGTCACTC[T/C]CTTTCTGTCAGATTGGTAAAGTGTTGgtgtgtgtgtgtgtgtgCGCGTTTTTTTTGATTA	[T/C]	2L	44467703		IG	0	1
AGAMP3_2L_44472942	TGCGTCCCTGTAGCACAGTTCAAAACGATCGATGCTTGCAACCAATTTCCATCCATCCAG[T/C]CGCTAGTATCTTCCCCCGTGCGTTAATTGGGTAAAGCGATGGCGAATCAATTTGCCGGTC	[T/C]	2L	44472942		IG	0	1
AGAMP3_2L_44476968	TCAGCGCAGCTAGCGCTTCTTGCAATGCAATTCAGAGGTTGTAtttttttttACTGTTCT[A/T]CCTAACCAACCGAACGCCGGCTGGTCTGTAAGCTAATTTTTCGTTTCAGTACTTTTGCAT	[T/A]	2L	44476968			0	0
AGAMP3_2L_44484642	TTGTTTTGCCTCTCGTCCAGAGCGCAAATCGTCTTCGGTGCGCTCTGAAGACGTGAACGG[T/C]GAAGGCGGGCAATTAAAAACAAACACCCCGCCACGAGTGCCCGCCTTTACACTTCGCCCT	[A/G]	2L	44484642			0	0
AGAMP3_2L_44491625	ACTAGTTGACAGGGGATAGACATCATCATTCGAGAGAAACttttttttCCCATCGATCTG[A/C]ACGGTACCTCACAACTATTGCACAACGCTCAAAAACAACACCTCCTCAGTTTAGGGAGCT	[A/C]	2L	44491625		IG	0	1
AGAMP3_2L_44499383	TCCGAAGCACTTCCGGCATCTTGCCGTACATAAACAAGGTTTCATCGTCATCACGAACAA[A/G]CCCCTTCCTTGAAGGGTGCATCTTTCAAGCTAATCCTTCACATACTGATAAGGGAGATTA	[T/C]	2L	44499383			0	0
PX12-snp2	TTCCGCCAGCCGGTTGTGCTCCCGCATCCACACGATGTGCATCGT[C/G]GTCAGTCCGAGCTGCTCGTTCACGCGGATATCACCCGCCGTGAAGCAGTTGATCTGACT	[G/C]	2L	44502325		IG	0	1
AGAMP3_2L_44505292	AAATGGGAATTGTCCTTTCCCATGCACTTCCATTGCTCCCCGCCCTCCAATCTCTTCCCT[A/G]AATAGTCATTATGGGGTGCGGGGAAATGTGTGAAAAACGGAAAATCAAACCAATTATAGC	[A/G]	2L	44505292		IG	0	1
AGAMP3_2L_44634338	TTAGATAGTATTTTGGAAGTAATGTGGAACGCAAACAAGGGAGGAACGGTCAAATTGCAT[A/T]CATTCAAAGCCAAGACTGGCGGTAACCAAAAAGAAAACAAATAATATAGAAGCGACACTT	[A/T]	2L	44634338		IG	0	1
FLIGHTIN-46	TTACCCTGAGGTCTRTTTTGCCTCTTGAAAAGAACAACAACGAGA[T/G]AAGGCGTTTCAARCAATTAGAACCTTACCTGTTTCTGACCAATTTGTCTGTGTTTRCGGG	[T/G]	2L	44637918			0	0
AGAMP3_2L_44638232	AAGAAAACTCCAACACATTTCGCTTAGGTTTCAGAGTTACTTTCGTTTATTGAAATTCGT[T/G]GTGGTAGGAGCGTTTTGGTGTTCTATTCGTAAGAGGGTGAATTGGGTGTGAAGGTCAGGT	[A/C]	2L	44638232		IG	0	1
AGAMP3_2L_44645329	CAATTGAAAGGGAATAGGATGTTTCTTTTCTATCCTAAAGCATGCTACATCGCTAGCCAT[T/G]TTTGTAGTTTATCTGTAAACAAATGGACTGTACTGTAAGAGCTCCCAATCACATCATTTC	[T/G]	2L	44645329		IG	0	1
AGAMP3_2L_46842787	TTTATATGCATTTCATCTACCGACCGAAACCGCTCGCGGACGGTTCATTACAAACTCCCA[T/C]TGATGTGTTGTATTTATTGTGCAATGCCCTTGTGCGCATTTGAACATTTTGTACGAGGGA	[T/C]	2L	46842787			0	0
CYP6AH1-snp1	CCCGAAGCCGCTSCCGATCTTCGGCAATCTGYTCGAGCAGCTGACGGGGCAGAAACATTT[T/C]GGCGAAATWTTTGAGGAAATGTACCGAGCGTTCCCGCAGGCCAGCTGGATCGGGTACTAC	[T/C]	2L	46846198		S	0	0
AGAMP3_2L_46846291	CCCGCAGGCCAGCTGGATCGGGTACTACAAGATATCGAACCAGCCGGGCATTGTGGTGCG[A/C]GATCTGGAGCTGGTGAAGGAGGTGCTGACCAGCAGCTTCTCGTCGTTCAATCAGAACGAT	[A/C]	2L	46846291			0	0
db5539401	GGATGGCAATTGAGAAGAAATGTATGTATTGTTGGCCGTTTTTGAATTGCATTTGTAACA[A/G]ACCCCCCACCATTTCCCATTCTCCCCCGCCCCAGTCACMACGGATAAGATGGATGC	[T/C]	2L	46850890	rs5539401		0	0
db5540351	GCCATCGTTGTACAGCTGCAGCAACCGGCACCGGAAGTTGTCGATCAGCTCGAGCTGTAG[C/G]TCGAGAAACTGGAGCTGCTGGCTRGGCTGGGGCAGGCAGCAGTAGCGCTCCTTTAT	[C/G]	2L	46851106	rs5540351		0	0
db5555866	CTATTACATACAAACGATTTCTACGCTAACCCATAACCGAACGAGAACGAGAGCAAACAC[A/T]TTGCTTTGGGTTTCGTTTTATTCTGCATCCATCCATCTCTGCGTCACTAGCCAATC	[T/A]	2L	46852026	rs5555866	IG	0	1
AGAMP3_2L_46916257	GATGTTGTAAGTGAGAAAGAAAATATTTAAACATTGGATGAACAATTTTGATCGTTATTT[T/C]AAATGAAATGAAAACAATAACGAACGATATTGCTGGACAATGTTCCGGTACGGATGAAGG	[T/C]	2L	46916257		IGD	1	0
AGAMP3_2L_46964503	CTTTTGAAGTGGGGAGATTAGTTTCGCTTAAGGTTAAGACATCAATTGAGATCGAGTCAG[T/C]GGACGCACGATCACGTCTTCTCATTCATGGTCAAGAGTAGTATGAGCGTTACTGCAACAT	[A/G]	2L	46964503		IG	1	1
AGAMP3_2L_47434521	CCTCAAACACGTGGGGCGATCGCATCGATACAAGACGGCACACCACACCACAGCAGTACG[A/G]GAGACAGCTGCAACTACGGCGACGGAAGGGTTTCTGCGTTGCACATTTCCTTCCGTGTGT	[T/C]	2L	47434521		IG	0	1
TPX3-54	GTTCAGAAGCTGAACGCGGAGGTGATTGCGGCCAGCATCGATTCGCACTTCAC[C/G]CATCTGGCCTGGATCAACACGCCGCGCAAGGAGGGCGGGCTGGGCAAGATCAACATTCCG	[G/C]	2L	47438970		S	0	0
AGAMP3_2L_47442831	GATGGTGGTGTTGGtaagcaagcaagcaagcaagcaagcaCACGTACGCATCCTCCACAC[A/G]CGCCAACTCTCTTTTTTAACAATGGGTGGTCTGGTTTAGTAATTTACGCAAATACGCTAA	[A/G]	2L	47442831		IGD	0	0
TPX3-D-88	GTGTGGCGGCACTTTTYGKYTCTTCAACACACAACGCCTAATGTATCGCAACACCTCCGC[A/G]TAGAGCAGCTAATAAAAAGACGACAAAAATGTTAAAATCATTAGGCGGCATGGTGCCGCT	[A/G]	2L	47444199			0	0
AGAMP3_2L_47468919	TCGTTCTTTTCTGGAAGACTGAAAGGACGATATAAAAGCAATCAAATTTGTGGCTGCTGA[A/T]TCGAATaaaaatattcaacaaaaacaaaacagaaaaaaaacagaaaaaaaGGATTTGCTC	[A/T]	2L	47468919		S	1	1
AGAMP3_2L_47511865	TAGAATGCTTAGTAGGCGTTGCTAATGCATGTTGCTTCACCAAAGCTCTGCGGATTGGGC[A/G]TGAGCTTTCAAGTATCGGCATAAAAGCATCCATTTTTCAGTTCGATTTAAGACTTGATTG	[A/G]	2L	47511865			1	0
AGAMP3_3R_7520	AGCTGGAGTACGACTCGGGTGACAATCGTGGGAAGACAAAAGTTGTTAAGTGAAAGCGAC[T/G]TTTCCCCCCTTCTCGGTTATCGGTTCGAAAAGATGGAGTAACCACTTCCGTTAACGTTGT	[A/C]	3R	7520		IG	1	1
AGAMP3_3R_1312642	CGGAAGGTTCACTATCACGATCACGATTTAAATCACTGCACGGTGAACGCGGGTGTGGTG[A/C]AAGCAGTTTCTTTTTATGTTGTAAGTTTCTTTTCTCCGTTTCGTGTTTCCGGTGTTCGGA	[A/C]	3R	1312642		IG	0	1
AGAMP3_3R_1319140	CAGCAACCACGGGGAAATGCGCGTCGGGTCAAAGTCAGGCATTTCGTAGTACACGTTCAC[A/G]AACTCCTGATCCTCGGCAATGACCGTACGCTGCGGATCGGGATCGTAGTAGATGGCCGTG	[T/C]	3R	1319140		S	0	1
AGAMP3_3R_1320724	AATGGCGCGCTGGATTTCGGCGTACGTCTGCGGATCGGCAATGGTGTCACCGATACCGAT[A/G]CTGTGACCCTCCAACAACAGCCAGTTGTTGACGACCGTCTGGATGTTGCCGTAAAACCGG	[A/G]	3R	1320724		S	0	1
AGAMP3_3R_1326444	GGACTTTTACCGCTGGTGTATCCGAGATTAAAGTTTTAGCGATGGAATGGGGTGGTGCAG[T/C]GTGCTCAATGATTGTTACGTTTGTGATTTTTTGGTGAAAGGGTAAAAACTGTTGGGATCA	[T/C]	3R	1326444		3UTR/I	0	1
AGAMP3_3R_1330260	TTGGTTCTGCTTTTCATCCATCCACCGTTGCTGAAACACGGTGGATTTTTCTATTGTTAT[T/C]GAAGTGAGCATTATTATGTGTTTGTGTGTGTTTTTTGTATTCCCTTACGAAGGCAGAATG	[T/C]	3R	1330260		5UTR	0	1
AGAMP3_3R_1911172	TTTTTCCGCTTGCGCACGCTACTAAAAGCGGCTCCGAGATGCAATTTCGAAACTACCGTA[A/C]GTATCGGTGGAAAATAATGATAAAAACTATCAACTACCTGCTGGGTGTATCTCTTTCCAA	[A/C]	3R	1911172		IG	1	1
ABCC12-U-snp3	TGAATTGAAGGTGGTCGTGATCTTGGGTTTGGTGGGTGTCGCGTATTCCGGTATAGGGCT[T/G]GGYGGTGCAGCAACAGCAGAAGTGGTTCCAACCGATAGAGGAAGAAATATYGGTTTCGGC	[T/G]	3R	2784163		S	0	1
ABCC12-U-snp1	TGAACGTATGRATCCTTKGGAACGAACCGATTGCCATAAATGTCATAGAGCGTCGGTTGG[A/T]AGGAGCTGTAGTACATTGACTCATTTAAGGGCTGATTCCGAAGGTTATCATACACYGCCG	[T/A]	3R	2784330		NS	0	1
ABCC12-snp1	ATTGCTGATACCGATCAATCGCAAGATTGCGCAGAAAATTGGACAACTCTCGCAGGGCCT[A/C]ATGGCAGCGAAGGATGCGCGTGTCACGATCACGACGGAAACCATCAGTGGAGCCAARGAC	[A/C]	3R	2789155	rs5580396	S	0	1
ABCC12-snp2	CCTMATGGCAGCGAAGGATGCGCGTGTCACGATCACGACGGAAACCATCAGTGGAGCCAA[A/G]GACATCAAGCTAAACGCCTGGGAGGATGTTTTCATCAGCAAGATCCATCGCGAACGAGGT	[A/G]	3R	2789212		S	0	1
AGAMP3_3R_2790253	GCGCATCATTGTCACGCAGCACTCGATGGTGCTTAATCGGGCGACGCAAATCCTTCACGT[A/G]GAAGCTGGCCAAGTTACGCAAAGCGATGCACCGAACGTGGGATCGCTGTTGAGTGATTAC	[A/G]	3R	2790253		S	0	1
AGAMP3_3R_2795774	GATCAATCAttttttttAGGTTATGCAACGGGCGCTTTTGCATATTCAAAACGCGTACAA[A/G]ATATCCAACATTCGTATCGAAGGATGGGTTTGTAAAACCAATTTACCATCCTGTACCGCG	[A/G]	3R	2795774		IGUD	0	1
ABCC12-D-snp1	TGGTCCCGGYACCTACAAGYTGCCCGGGTTTGCGAACATCCCGGGAGAGCTGAACGTTTC[A/G]CTGCTMACTGGAGCACCGAATCCTCGGGCCGTATATTCATCCAAAGCTATTGGRGAGCCG	[A/G]	3R	2796833		IGUD	0	0
ABCC12-D-snp3	CGTGCTGAACTCGCRGGAGCAATAAGGTTGAAATTGCC[A/G]GTGACACCTTCCTCCAAACGTGCGGCCGCAATGGCTGCCTTGATTGCAAAGTATACRGAC	[T/C]	3R	2796971		IGUD	0	1
XD-1	ATCGGCCGATTGCAAAACCTCACTCCAGCACTTACCAACATTGCAGCCYTCGATCTGCTG[A/G]TTGTAGTGCGTTGTATCGCCTTCCCGGTACATGTTCAGYTCGATCAGCTCGACGTAGTCC	[T/C]	3R	2804103		S	0	1
XD-D-1	TTTTTTTNCAGAGAACTTAGTGTAAAGGAAGCAATGTGGATGCAGCAACAGGG[T/C]GAAACGACCACTACGGTAGAAAAGATACGCCACATGCAAGATGAAATACAACAACTTAAG	[T/C]	3R	2809446		S	0	0
ODD-U-snp1	ATTCCTATGTCCGAACGATGTGGTATAAATTATAAGATTATTTGATCATAACTGGAAGAG[C/G]TTCRCTTGTGACYAGTGTTGGAATGGGGAAAAGATTAATCGAATATTTTATAATTAGCAG	[G/C]	3R	3473204			0	0
AGAMP3_3R_3475128	CACGAGAGGGATACTAATTATGTTGACAAAAACCGACGACCCAGCGTTCCTTCGGGGCAA[C/G]GAAGCGAGTGCCAGTATGTAGAGGTTTTGTGCCATTTTATGGTGATTGCAATTGCAGCAT	[C/G]	3R	3475128		IG	0	1
AGAMP3_3R_3479498	GGGACAATGTTTACAAAGACTGATATTTGTTTTTATTACTTACTAATTATTGCTGAGACG[T/C]AAGGAGGCTCGTTCGAGAAGAGGGCAGGCAGGCAGCAGAGCAATAATAGTATGCCAGGGA	[A/G]	3R	3479498		IG	0	1
ODD-D-snp1	CAGTGCTGTGCTTTATGGGGATATTGGAGGGTAAATTTGGGAGTCAGTATAAGATGAAAC[T/G]AAATTCTCTCAAARAAGAGTTTGCATGCAAATTGATCGTGCCAATGTAGGATAATTTCAA	[T/G]	3R	3483598			0	0
AGAMP3_3R_3804711	GGGGTCAACACCAATTAAGCATGCAGAGTTCCGTCGGGTCGTACTCAAAATTCTCCGACT[T/C]GCCAGCAAAACGCACCATTCGGCATGATAGTGATCGTGGTCAGCATTATGCTTCCCTCGA	[A/G]	3R	3804711		IG	1	1
AGAMP3_3R_4315360	GCCACGAGCGCCACCGGACAAAAGGTAAAGGGAAGGCTCACTGAAGCGGTTACAGCACAA[T/G]AAAAAAGGGCAACAGCAAACCCAGCGAAGGGTGTCCTCGTTGATTGGAGCAATTAGCTGC	[T/G]	3R	4315360		IGU	0	0
CYP12F4-snp2	GTTGATATTACCYCAKTTYCCRCAGACCTCCTCAGGATCGACGGGAATTCTGTACTGTCT[A/G]GCCAAGAACCCYGACAAGCAGGAGAAACTTCGTGCCGAGCTGCGGAAGATTATGCCCAAC	[A/G]	3R	4320255	rs3308641	S	0	0
db5523540	CATTCATTTCCTTGAATAGCTGTTAGAGGCGATCTCCACCGCGCTAGCTTATCGGCGTTG[C/T]AAATTACCGCATCGTATACATTTGGTTTTGGTTGTGAGGGTAGCATCCGTCGCTAAATGT	[T/C]	3R	4321341	rs5523540	IGUD	0	1
db3308663	AAAACCCACGGAACAGCTGCCACAGCGTTGGCCCGGGAATGGATTTGTACGGTTTAGCTG[A/T]GGCCCATTCCGGATCGATCACATGCTCTGCAGTTGCAGTGTTCCGTTGCGCTTGCGCCTG	[T/A]	3R	4321636	rs3308663	NS	0	1
CYP12F3-snp1	GCGCAGCTGCATTGGCAAGCGG[T/C]TGGCAATGATGGAGATGGAGGTGATACTGGCCCGGTGGATTAGACAGTTTGAGTTCCGRT	[T/C]	3R	4323717		S	0	1
CYP12F3-snp2	TGCWTWATAACCACCACATTAGTCMTCTAAATCCCTGATCTCAAACTTCAGCGGACA[T/C]CCCGGCATGTTGATAACGGTCGTGCGAAACTTATAGTCCTCGTAGTTCCAYCGGAACTCA	[A/G]	3R	4323827			0	0
db5584409	CCAGAACACCCATCGTTTCAAGTGCCCACCGATTAAGCCACTGATCAAAGTCCTTCGGTA[C/G]CTCGTTCTTCTCATCCCTCATGCCTGCTACCCTGCAACGAAAAGAGATTGTAAAACATCT	[G/C]	3R	4325106	rs5584409	IGD	0	1
CYP12F2-snp1	GATGTATCAACCCGTMGCTGGAAACATGCGTGCCGCCGG[T/G]CGGGACTTGGTCCTGCAGGGCTATCAAATTCCAAAGGGAGTAAGTGTACCTCAAAGAAGC	[T/G]	3R	4325903		S	0	0
db3308680	CTGCGGCAACGGTGTTTACATACCTTTTTGCGCACAAACGTTCAGTGGAACCACGAGACC[G/T]TTGCATCAAAGTACGCCAAGCCATTTTTCGGAAGGGAAAATCACACGCGCACACAACTAA	[A/C]	3R	4326826	rs3308680	S	0	0
db3308682	AGTTGATCTTTAGGCATCAACGGTCGCTTTACCTCCTTCTTTGAATTCCTTCGCAAACGC[A/C]AACAACTTCGGACTGGGAATGGCTTTGTACGGCTTTGCGTTGCTCCATTCCGGATCGATA	[A/C]	3R	4326960	rs3308682	NS	0	1
db3308738	ATGTGCCTCCTTTCCGCTGGGTATACCCATGCCCTGTCCTTCGGGTAGCCATCTTTCCGG[C/T]AGAAATGCGTCCGGCTGAGGGAAGTAAGTTGCATCACGCTGCAACGCTAGCGTTCCCATC	[A/G]	3R	4328545	rs3308738	S	0	1
db5416273	TTAACCGATGCTAATGAAATTGTGAAAATCATGAACATTAAGATGTGGAGTGGACCTCGG[A/G]CAATGGCCTCCCGACAGGGCGGGCGAACCTACCTTTAAGTGCTAATCGTCCCCAATCGGG	[T/C]	3R	4329975	rs5416273	IGD	0	1
eng-283	CGTGTGGTACGGATGGAGGGGHAGRGGGGTGGCCGAGCTGCTTCCATTGCTGCTGCAAAG[C/G]CGCGGRCTCTTGCTGATGTCGTACGGCCGGAACAGRCTGTCCCTTCGCTCCAGAGACGCT	[C/G]	3R	4384732		S	1	1
AGAMP3_3R_5716755	ATGGAGGTGAAATCTGCACAACATGCATGCCAAACATGCCGTGACGATGCCGTGCCGATC[A/G]GTGTTTGATCGAATTAGGAGAAAGTTTATGACTTAATCTCTTATGGACAGGCGACGACGC	[A/G]	3R	5716755		I	1	1
AGAMP3_3R_6897011	CGTAAGGGCTTTAATCTTCAGTCAATTGCTGAGCTGGGAGCTTGACATTGCTGGTGACGA[A/G]GGAGACATGATTTTGCATACATGTCACCCCTATTGTCAAGCTGGTATGGTATTGCCAATC	[A/G]	3R	6897011		IG	0	1
CYP6S2-U-snp1	CGGGCMCATCAGTCCATATTATGGTTGATACAAAAACGGATTAAAAGAAGCATTTTTCGT[A/G]TGTTGAGAATGTGCATACATTCACTTCCTTTGGAGAGTTCACATTCACCCSCCCCTTTGT	[A/G]	3R	6898838		IGU	0	0
CYP6S2-U-snp2	CAACAYACGAAAAATGCTTCTTTTAATCCGTTTTTGTATCAACCATAATATGGACTGATG[T/G]GCCCGTATCGCTCATTACACACAAATGGCTAGCAGTGTGCATATCCATCAGCGCGCCAAA	[A/C]	3R	6898893		IGU	0	0
CYP6S2-U-snp3	AGGATGACATGGTTCCGRGAACWCTCCGTCTGGCAGTAGCAGGTGTGGCCAG[C/G]CTAATGCTGGCTCTRCCGGAAAGCTCTCTTTGGCGCGCTGATGGATATGCACACTGCTAG	[G/C]	3R	6898982		IGU	0	0
db5071427	CGGCCCCAAAAGGTTGCGCCCAACGGTTCCACGCCATGGATGGGAGCAGGCGTTTGCGGT[A/G]GCGATAAAGTGAAGGTAATTTATTCTCCATGATAGCGCCATCGAAGCGTGGCAAACGAAT	[A/G]	3R	6900496	rs5071427		0	0
AGAMP3_3R_6901774	AACGCAAACACGTGTCCTCTTTTATGGCGCTAAAGCTGCCGCGACATCGGCCTCGCGCTG[C/G]CAGTGCAGATTAACCCAATTTCGGCGAAACAGATGAAAGCTTTTACTTCGCCGAACCGAT	[G/C]	3R	6901774		IGD	0	1
db5219858	TTTCTACGGCACTTCGGTAGCGTCTTTGCACAGCTGTAGACAATCTTTGTTTTCAGTTTG[C/T]GAATTGAATTGACAAGCGAAGTGGACGGCAACGTTAGTAGTTTTCCTGAGTAACACTTCA	[A/G]	3R	6902665	rs5219858	IGD	0	1
db5216794	CTTTTCTTCTTTCGCGATCCCGTGCTGCTTGTGCTGTCGCCCGAGTTCGCCCGGACGGTT[A/C]TGGTGAAGGACTTTAACTACTTCGTCGATCGGGGTGTGTACAGTAATGAAGAGTTTGATC	[A/C]	3R	6903385	rs5216794	NS	0	1
CYP6S2-snp3	TCTTTRATGTCTATYCGCTGCATTCTGACACACCGCTCMCCAAGATGCTGGTCCAGCCGG[T/G]TCGCTACGTCCACAATGGTGTGGAACATGGCCTTCAGCTTGCCGGAGGTAAAGGTTGGCG	[T/G]	3R	6903569	rs5205916		0	0
CYP6S2-snp1	GAAGAACACTTTGAGCGATTTCAGCTTCGGTAGGTTGATCATCCGCTTGCCCATCAGTCG[A/G]AACTGGGAGTTGGGATTTTCCAGCGTGTTACACTCGATCCCGAACGCACACGAACCGATC	[A/G]	3R	6903717	rs5205130	S	0	1
AGAMP3_3R_6905344	GCCCGACACCCTCAAGCCAACCATCCACTTTGCGTACATCATCGAGAAGCTGTACAAGAG[A/G]CTGAAATCGAAGGGGGATTATGTTGGCATTTACTTCTTCCGCGATCCGGTACTGCTCGTC	[T/C]	3R	6905344		S	0	1
CYP6S1-snp1	GGCCATCAGCTGTCGGACGTCGATCCGCTTCACTTGCTKGCATTTTTCCGCCAGATGCTG[A/G]TCCAACCGGTTACCCACGTCCACTATCGTGTGGAACATGGCCTTCAGCTTGCCSGAGGTA	[T/C]	3R	6905626			0	0
AGAMP3_3R_6907044	AATGCAAATTTTAGGACCCGCGCCAAAGGGAAGAAAGGTGTAGGGTGCGCGCTGCCTGCA[A/T]GCTTCCGGCGTGAAGCGATCCGGATCGAAACGTTCCGGTTCGGGGTAGTGCTGCGGATCG	[T/A]	3R	6907044			0	0
Cyp6R1-snp2	ACGTCCCGAGYTGCAGCAGCGTGCAAGGGCGTGCGTTTGYGAGGCGCTGGAGAAGCATGG[A/T]GGCATCACGTACGAAGCAATTGCCCAGATG	[A/T]	3R	6907363		S	0	1
Cyp6R1-snp1	CCGTGAGCACACCTTCARACGCAACTTTCTCGCCACRGMRCGGTATGACGTCATTAGGAA[T/C]AGCTTCCACACACTGGGCAGYAGGAASCCHCCACGCATAACYGCCTCATGCAGACCACCT	[A/G]	3R	6907720		S	0	0
CYP6Y2-snp1	TGTCGAAGTGTTTGCGCCCGATGCGCCGGAACTCGTTCTGCGGATCCCGGAAGCTGTTCA[A/G]CTCCAGCCCGAACGCGTACGAACCGATCACGTCCGTCGTGAAGCGTGCCATAAGATCGCG	[T/C]	3R	6912468	rs5153329	S	0	1
AGAMP3_3R_6914129	CGCGTAGATCGGTATCATAATCTTCTGACCACGGCGCAGAAGCAGCCCACTGTCCGGCAA[A/T]CGGTAGTCCTTATCGGCGTTACGCTCCAGTATCGCCACCGGTGGATGTTTGCGCAGTGTC	[A/T]	3R	6914129			0	0
CYP6Y1-snp1	CTTCATGCCCAAGGCGTTCGCGTGCGCCCTGAACGCCTTCATGAGGTACACGACCAGCGG[T/C]GAATGGCGCAGCTTGTCGAACGCGATCTTACCGTACCGGCGGAACTCATTGTCCGGMTCC	[A/G]	3R	6914706	rs5114099	S	0	1
CYP6Y1-snp2	ACCGTACCGGCGGAACTCATTGTCCGGMTCCCGGAAGCTGTTACACTCGATCCCGAACGC[A/G]CACGCCCCTATCACATCGATCGTGTAGCGGGAGAGAAGATCATGCACTTCAACCTCATCA	[T/C]	3R	6914796	rs5113970	S	0	0
CYP6Y1-snp3	GAACGGTTCTGTGAGCATCTGAAC[C/G]AGTCACTGCAGTCCTCTGATGAGGTTGAAGTGCATGATCTTCTCTCCCGCTACACGATCG	[G/C]	3R	6914873		NS	0	0
AGAMP3_3R_6915048	GCCCTCGATCGCGAACATGTGGGCGGACAGTGGATCATCGCGCTCGTTGAAGTAAACGCC[A/C]CGGTTCGGGAAGTGATGGAAGTCTTTCACCAGCAGCTGCTTGATCAGCTTCGTGTCGAAG	[T/G]	3R	6915048		S	0	1
AGAMP3_3R_6915306	GCGGGGCTTGATGTAGGCGACGGAACGATCCTTCCAAAAGTGGTAACGACGGTGGATCCA[T/C]GCCAAGCACGACAGCACAATGGCTAGTACAACGCCAACCAACTGCAGAAACATACTTGCG	[T/C]	3R	6915306			0	0
CYP6M1-snp2	AATCACATCGGTCGTGWAGCGGGCCATCACATCTTTCAGCTCCATCTCACCGTGCTTCTG[A/G]ACGTTTTCCTCCATAAAGTCTCGCAGCTGCTGGCCCGCCGCCACCACCGTCGGGAACATC	[A/G]	3R	6916446		S	0	1
CYP6M1-snp1	GGAGCTGAAAGATGTGATGGCCCGCTWCACGACCGATGTGATTGGGACGTGCGCGTTCGG[A/G]ATCGAGTGTAACAGTATGCGTGATCCGGATGCGGAGTTCCGGGCGATGGGGAAACTGTTT	[A/G]	3R	6916524			0	0
AGAMP3_3R_6922061	nnnnnnnnnnnnnnnGCTTCATCTTACCGGAGTGAACGGTCGGTGTAAGCTTTGCTCGTA[A/G]GTTTTTCCACTTTGATCCCTCCATCGCCACCAAATGACGTGAAAGAGGATCATCCCGATC	[A/G]	3R	6922061			0	0
Cyp6M2-snp6	CTACTATCTYGATCGGAAGCGYTCCTACTGGCAGGATCGTGGTGTGCCCGGTCCRAAGGG[T/C]GAGCTGCTGTTCGGGAACTTTGGCTCGATCGGCACGAAGGAACACATTACCGTGCCGTTT	[A/G]	3R	6929025	rs5106466		0	0
Cyp6M2-snp5	ATCYTTYACAAACACACRCTTCAGCARCTCCAGATCGGTRATCAGTGCCACCGGCTTCAC[A/G]AACTGATACATGCCCGCGAACGGATGCTTRMCCTTGTTGKCATCRTAGATCCTCTTAAAC	[A/G]	3R	6929142	rs5106871	S	0	1
Cyp6M2-snp4	CACGAYCGCGGWACGTTCTACAAYGAGCGGGAYGATCCACTGTCGGCGCATCTGTTCAAT[T/C]TGGAGGGTCAGAAGTGGCGCTCGCTGCGCAACAAACTYTCGCCCACGTTCACKTCCGGSA	[T/C]	3R	6929275		S	0	0
Cyp6M2-snp3	GCGCAACAAACTYTCGCCCACGTTCACKTCCGGSAAGATGAAGATGATGTTCCCCACGAT[T/C]GTGACTGCCGGCAAACAGTTTAAGGACTTTATGGAGGAAACGGTGCTGCGTGARAACGAG	[A/G]	3R	6929361		S	0	1
Cyp6M2-snp1	GATCAARATGATGAGYAAAGACGGAGAGAAGTCRGRYGAKGATTCGCTAACGTTCAACGA[A/G]ATYGCTGCACAGGCGTTTGTGTTTTTCCTGGCYGGKTTTGAGACTTCKTCRACWCTCCTC	[A/G]	3R	6929787		S	0	1
Cyp6M2-ex2-snp9	CCCGGTWCATTTCCGTGTGGCTTCRAAAGACTAYYAYGTCCCCGGTACGAAATCCGTCCT[A/G]GARKCCGGTACAGCCGTCATGATCCCAGTGCATGCYATCCAYCACGATCYGGAAGWGTTC	[A/G]	3R	6930156			0	0
Cyp6M2-ex2-snp8	CCATYGGGATGAYGGTTTTCGAGCTYGGYGCAAAYCGGAACCCATCCAGCAGATACGCCA[A/G]CCCWATACGGGCCTGCATCATACCGAATCGCAGYCCAACRCATATCCTYGGACCCTCYCC	[A/G]	3R	6930358		NS	0	0
CYP6M3-snp1	CTTCCACGATCGCGGTACGTACTACAACGAGAAGCATGATCCGCTCACGGCACATCTGTT[T/C]AACATYGAGGGYCAGAAGTGGAAAAACCTTCGCAATAAGCTGTCACCCACGTTCACGTCC	[T/C]	3R	6932346		S	0	0
CYP6M3-snp4	ARAAGTCCGAAACCTCCGGATCGAGGGTGCGGAGCCCAATAAGTTTTGCCAGCCGTGGCA[A/T]GGAGTTGATCACAAGACTCTTCACTTTACCACGCGGCTTGGAGAAGATCTTCCGGCCCAT	[A/T]	3R	6932665	rs5338127	NS	0	1
AGAMP3_3R_6933885	CTTCTTAAATACTCGTCGACATAGTGCCATGCGAGAATAATCCCTATCAGTAGTGAGTGA[A/G]TCTTCGTCGCATACAGTGATACAGAAAAAGTGAAAGATTGTTGCATAATTATTCAGAAAA	[A/G]	3R	6933885		3UTR	0	1
CYP6M4-snp3	CGAGCTCAAAGGAAAACATCCRTTCGGTGGCATTTACATGTTTACTAAACCCGTTGCACT[A/G]GTAACCGATCTGGAGCTTGTGAAGAATGTTTTTGTGAAGGATTTYCAGTACTTTCACGAT	[T/C]	3R	6934194		S	0	1
CYP6M4-D-snp2	CATTAAAAATTTCCTTCCAGAGGAAATACGCTTTTGGGGCAGTTCTTTCGATGAAACGAT[T/G]AGAAGCTGTCTACGTTTAAATTGAATTTGACGTTAATYACCACTCTCTCTYTCTCTCGTG	[T/G]	3R	6939131		IGD	0	1
CYP6M4-D-snp1	CGTTTCATCGAAAGAACTGCCCCAAAAGCGTATTTCCTCTGGAAGGAAATTTTTAATGCT[A/G]TCGCTTGATGATCGGCCTATTCAACTGCTTTTCGTTAATTCCAAAACGCGACTCACAACG	[T/C]	3R	6939194		IGD	0	1
AGAMP3_3R_6942944	AATGTATTCCAATTCAATCGTGTGTCAGTTTGATGAAGCGATCCGTATGAAGAATGAAAG[A/G]GACCTTCaaaaaagaagaaaaaaaaaaaagaaaaagaaaaTCCACCAGCATTGCGTAACG	[A/G]	3R	6942944		IGD	0	1
AGAMP3_3R_6944357	GGGGCGTTCGTTTCCGAGCGGGAATGTTGGCACGGAAtgtgtgtgtgtgtgCTGCTTTCT[T/C]TTGGAGGCAATCGTAGAGCGTCATAAAAACACAGCACCATTTTAAAAGCTCTTTACCGGT	[A/G]	3R	6944357			0	0
AGAMP3_3R_6970580	ACCCATCAAAGTTTCCCATCATCAGAAACCGAATCTTATTTTCCACCTACGTAACGCTTG[T/C]CCCCGGCCAGAGATTGAAGGTTGACGGTTGGCGGCCGGTTTCGGGCACGTACACACATAC	[A/G]	3R	6970580		IGD	0	1
AGAMP3_3R_6971296	CAGGGATATTGTCAAGTCATTCCAGTTTGCGTTTGTACTGCGTCATGCTGTGACTGGCTG[A/T]CAGTGGCTGGTGAATGGAACGCGATATGGGCGTGAGCCGGTCGTGTATTGGTGTTACTAC	[T/A]	3R	6971296		IGD	0	1
Cyp6Z2-snp1	GTTGAGTATCAGTATGAACGAGAAGTACTTCCCCGATCCAGAGCTCTATTCTCCAGAGCG[A/G]TTYGAYGAGGCCACAAAGAACTACGATGCAGATGCGTACTATCCGTTCGGAGCTGG	[A/G]	3R	6974216			0	0
Cyp6Z2-snp2	RGAAACGCTTCGAAAGTATCCGGGCTTGCCGATTCTGAACCGAGAGTGCACGATCGACTA[T/C]AAAGTGCCGGASAGTGATGTTGTGATACGCAAGGGAACTCAGGTGATCATACCGTTGTTG	[T/C]	3R	6974333			0	0
Cyp6Z2-snp3	RTAGTCGATCGTGCACTCTCGGTTCAGAATCGGCAAGCCCGGATACTTTCGAAGCGTTTC[T/C]TTCACGCACAAATCCAAGTACTTCATCTCTTTTATGTTCTCATACGTGATTTCGCCGTTA	[T/C]	3R	6974393			0	0
Cyp6Z2-snp4	TTTGTTCAGCTRCTGATTGATCTGCGTCGTGAAGCTGRTAAAGGTTCGGAAGAAGCACTT[A/T]CAATCGAACAGTGTGCGGCCAATGTGTTCCTGTTYTACATTGCCGGTGCRGAAACRTCAA	[T/A]	3R	6974608		NS	0	0
Cyp6Z2-snp5	CTTACCCGCATGACATCTCTCCAGCCTGAATTGAT[T/C]AAKTTTGTGATGGAGATCATCACCCATCAGATTGATCATCGCGAGAAGAATCARATCACT	[T/C]	3R	6974738		S	0	1
db5729456	AAACTGTATTCACAACTCGGAAGATCCCTTCCTATCGACACTGCGCCGTGCTAATCGGGG[A/C]CGCAACTTTATCGATAACTTCCGTTCGTCTGGTGTATTTATTTGTCCTGGGTTGTTGAAG	[A/C]	3R	6974834	rs5729456	S	0	0
Cyp6Z1-mac-snp2	ATGCGTACTATCCGTTCGGCGCCGGTCCTCGCAACTGTATCGGTAAGTAGAG[A/G]TAAATGCTTCACAAAGAYRGCACTTTTACAAAAAAGGTTCATTGCAGGTYTGCGGCAAGG	[A/G]	3R	6976753		I	0	0
Cyp6Z1-snp3	CTTCCACCGGTACGATTACATTCACACTGCACGAGCTKACGCACAATGCTGAGGCGATGG[A/C]TAAGCTTCAGCRAGAGGTCGATGAGATGATGGAGCGACACCACGGTGAAATCACGTACGA	[A/C]	3R	6977114		NS	0	0
Cyp6Z1-snp2	GGAAGAAACGCTCACCGATGCACAGTGTGCGGCCAATGTGTTTCTGTTTTACGGTGCTGG[C/G]GCCGATACTTCCACCGGTACGATTACATTCACACTGCACGAGCTKACGCACAATGCTGAG	[G/C]	3R	6977182		S	0	1
Cyp6Z1-snp1	ARAAGTTTACCACRGAAGTGATCAGYTCYCATCTGCACCAGCGTGAGACGGGCCAGGTGA[T/C]GCGCAAGGACTTTATCCAGATGCTAACGGATCTGCGCCGSAAGGCTGGYARCARYGGGGA	[T/C]	3R	6977300		NS	0	1
CYP6Z1-D-snp2	CAACATAAAACATTGTGCCACCAT[A/C]GAGGGATCGCAAATTGGTGAGTTGATTTAGCGTCTGATTTGCTTCCGTCAGCTTCGATCG	[T/G]	3R	6982969		IGU	0	1
AGAMP3_3R_7621685	ACGATCCAGGGGAGATCATTGATCGTCGGGGTAGGAAAGCATACGTAGCATACAGGGACC[A/T]ATGTGTGCAGTATGCAGATTAGTGTCACGAAGTACCGCGTTGAACTCCCAACCGGACAAC	[T/A]	3R	7621685		IG	1	1
AGAMP3_3R_9518117	GCGCGCGACATTCTGGTGACGCATCGTGGTGGTGACGTCGTGACGCCGGTTTGCCTCACA[A/G]TTCTCTGCTGTAtgtgtctgtgtgtgtttgtgtgtgtgcttgtgtgCGGGAAAAATAATG	[A/G]	3R	9518117		IG	1	0
AGAMP3_3R_9725053	CGCCTTCGCTTTGGAACATTGGACGCTCTTAAACGCATTTGCAAGTGATTTATCTTCCAG[T/C]GGAATCGTACGATGGAATAATCAGAAAGCCTCAGGACTTCCATTTCACATTTGCCGTACA	[T/C]	3R	9725053		IGU	0	1
PX13a-alt-snp4	CATACCGGCCCGRTTGGCGCTCGARTACCCACTGTAGTAGCCACCGTTCTCCARCCGCAG[A/G]TCCGGGTTGTTCGTAATCTGGCTGCCCAGCAGGATGGGCAGAAACTCGCTGTACGTGATG	[T/C]	3R	9727752	rs5046531	S	0	0
PX13a-snp2	CGGTGTCCACTCATCGCTGAAGCTCGCATGATCCGGTATGAACGTTTGCTGCATCGCCGG[A/C]GAAGACAGCAGTATCTCGGCCGACATCGAATCATTGTACATGTCCGGTGGCAGCATCGTC	[A/C]	3R	9727911		S	0	1
PX13a-snp1	GAGTTTCTCCCCGAACGGCTTACCGAACCGCTTCTCACACAGATTGATCGCYTTGTGGTA[A/T]GCCGGCACTCCATGATCGCGTCCACGCTGAATAGCCAGCGAGATCGGTGTCCACTCATCG	[T/A]	3R	9728016	rs5277297	S	0	1
AGAMP3_3R_9728712	ACGAAGCTGAACGAGCGCAAGCGCCAGGAGTACGAGGCGTGGGTACGACGTAAGTATTCT[T/C]TTCTGGATGATCTCACTCATtgatgggtgctctgatacaaaactcctcgattccaatcct	[T/C]	3R	9728712			0	0
AGAMP3_3R_9860952	GTGAAAGGCCAATCAGGTCGCCTTCTAGGTTTTTTCCCCGTTGCTCCTCTTTTCAAACGC[A/C]CAAAGATTAGAACCAAAGGTTTCATTAATGAAGAAGCGAACGTTAACTTCTTCTGGTAAG	[A/C]	3R	9860952			0	0
CYP4H16-snp1	ACTYCTYCAGGARCTTAAGTATYTGGATCTAGTAATCAAGGAGTCGTTGCGCTTAGTTCC[T/C]CCGGTTCCGTTCGTGGGGCGTAAACTTCTCGAGGATATGGAAATGAGTAAGTCACTTTGG	[A/G]	3R	9861447		S	0	1
AGAMP3_3R_9863736	GGCAATACTAACCCAGCAACTTAACGATGCTTGTTTTTAATGTGATTTTGTACGGATTTT[A/T]TGCCCGTGTACCATTCGCACCGTGACAAACCAACTGGTTTGCTTGTTTAGCTGCGAATGT	[T/A]	3R	9863736		IGU	0	0
AGAMP3_3R_9864640	GATGGTTCTTGTAGCAGAGAATCGTTTAACAGGATGGAAATACGTTTGCTCTGAATCAGC[A/T]TTGGTTAGCAAATTTCAAGACTAAAAAGTGTTGTTATTAGCTAGCCAAGCGTTCAACTTG	[T/A]	3R	9864640		IGU	0	1
AGAMP3_3R_9865120	TTTGGGAATAAATAGTCTCCAATCTCAGCTGACCCAATAAAACACCAGCATGAGAAAGAA[A/G]GAAAGACGAAGCACACACGCACACACAATCGAGTGGACCTATTATCGTAATCACATTCTT	[T/C]	3R	9865120			0	0
db5187329	CCATCATTTATCTTTCATGACTAGCCTCGATCTCGGAATCGATTTCGGTGCAAAAAGGAG[C/T]GAGTGTAGGGAAGGGTTTGGGGACAGTTTGGTGCAGCCYTATCGTAGCAGCTGTGCGCCC	[T/C]	3R	9865429	rs5187329		0	0
db5186376	CCTGTTCGGAAAGCTTCGTCCCGCACTTCTCACTGCTCAGCTCATTCCCAACGCTCGCGT[A/G]CCAGACACCAAGACCGGTTTCCTGCCGTATAATCAAATAGGATCTAATTTCGCAAACGTT	[A/G]	3R	9865680	rs5186376		0	0
CYP4H16-D-snp1	CTCAGCGAACGTAMCCTCCGGGRCGGGGTTTTCGGGGCGTCTTGAGGAATGTTTTGTCGG[A/C]ATGAAATTGTTAATAAAACCGTGTAACCCTTCCGCATTAGGCATTTGCTTTCCGAATCCT	[A/C]	3R	9867805		IG	0	0
AGAMP3_3R_9910233	GCCATTTTTCTCGACTTTCTTCCTTCTGTCCCTTTCTCAGCTCCTTCCAAAACCGCTTCC[A/G]CTTGTCAAACACGGTCAGGATAATGGATAATGAAAAACACAAACATATGCACCCGAGAGG	[A/G]	3R	9910233			0	0
CYP4H18-snp1	TTTGGTGGCCCAGAGTCGAGCTACTTTCTTGG[A/G]ACGTTTTATTTGTTCAAAGACAAAAGTATTCCAGGTAAGAAYGATGGTACAAGTACASKW	[T/C]	3R	9911823		S	0	1
CYP4H18-snp2	TGACCTCGTTGTTGGRCTTCACAAACGCTACGGYCAGGATGTGGCCATTATTGGTGCTTT[T/C]AACGATTTGGTGCTAGATCTGTCCAGCTCCAAGAATGTGGAAAAGATWCTGCTWGCGAAA	[T/C]	3R	9911990	rs5046496	S	0	1
CYP4H18-snp3	CCCWGTGCCCAACCATGGCTCAAGATAATCGTACACGAACGATTTCTTCGTGGTTTTCGC[A/T]AGCAGWATCTTTTCCACATTCTTGGAGCTGGACAGATCTAGCACCAAATCGTTRAAAGCA	[T/A]	3R	9912044		S	0	1
CYP4H18-snp4	ATCGTTCGTGTACGATTATCTTGAGCCATGGTTGGGCACWGGGCTGCTGATCTCGTTCGG[C/G]GAGAAGTGGTTCCAGCGGCGCAAGATAATAACGCCAGCGTTTCACTTCAAGATATTGGAC	[C/G]	3R	9912122		S	0	1
AGAMP3_3R_9915928	GCATCCTGCTGGGTATTGTTCCAGGAAAAGTGTCCCGTAGGTCGCTGTGGTTCTACAGAG[A/G]CTTTTTTTCTTTCCCCATGCCTCGCGGAATCTATTTTTATGCTCGCGCTGGTGGTTTCGG	[T/C]	3R	9915928		I	0	0
AGAMP3_3R_9921698	GATCAATTTCAACACAGCAGCACAACCGTTCCCTGACTCACGGATAAATTGCTCCAGGCA[A/T]TTCGAAATGGCGTTTCGCATCAATTCCAGGATTAAGCATTCATCAGACTCTGGAGTGTAC	[A/T]	3R	9921698		I	0	1
AGAMP3_3R_9923311	TCTCACGATCATGCGACAAGTGGCTGTCTCGAGTATCTAAATGGATCTAACTCTTTTCGC[A/T]ACATCGACACAACTTCCCCAATGAAGCCAGCTTTATCCACCATCTCCGGTTAAAGAGGGT	[A/T]	3R	9923311		I	0	1
AGAMP3_3R_9924675	ACGCACACCCTTGTTTGTATAGCCACGACACTGCTCAAACAGCAGTTTCAGTCAATTGTT[A/C]TATCATACGCATACAATTTTCCACTCAGTTGAGGAGAAAAATGGCCCCAGTCCCCCAATA	[A/C]	3R	9924675		I	0	1
AGAMP3_3R_9926264	GTTCAAGTATCACCAAAAGCGACAACAATTGCTAGAAATAGCGAAATATTTCAAGGGTCC[T/C]CGAGCGGACTACTTCCTGGGATGTTTCTATCTGTTCCGAAACAAGTCCGTTGCAGGTACG	[A/G]	3R	9926264		I	0	1
AGAMP3_3R_9926779	CAGGGCGAGTTTGATATCTACGATTATATCACGCTCTATGCGCTTGATAGTATTTGTGGT[A/G]GGTTTGGTTGCTTCACACGATTAGCTGACTTAGCTGGTGCCTTATCTGAATCACACTCTC	[T/C]	3R	9926779			0	0
db5480182	ACCGACGGCCTGTTCTGCCTGCAGCTGACTTCTTCTCGTGTTTATCACCGAGTTGGTAAA[A/G]TCGTGCAGCTTCTTAATCACACGCCCTTGCTCCCGCGCGAATGGATACAGGAAGAACAGG	[T/C]	3R	9927052	rs5480182	S	0	1
db5479267	GGACACGTTCCTCGATCAGCTGCTGAAGGTAACGATCGATGGAAAGCCCCTCAGCACGGC[A/C]GATATTCGTGAGGAGGTGGACACRTTCATGTTCGAAGGCCACGACACAACGACTTCGGGC	[A/C]	3R	9927220	rs5479267		0	0
AGAMP3_3R_9927463	GGACATGAAGTACTTGGATCTGGTGGTGAAGGAGTCACTCCGGCTTGTACCACCCGTTCC[A/G]TTTATCGGGCGTAAACTTCTCGAGGACATGGAAATGAGTGAGTTTGTTTGTTTTTACTTC	[T/C]	3R	9927463			0	0
AGAMP3_3R_9928521	CGGATGCACACAAGAGAACAAGCCGTCAAGGATCTTAAACTTTTTCTTCGCTTCCGTGCC[A/G]AGAAGAAAAAAGCTACCAAAAGATGACGAAAAAAGAAGCAGCGTAAGAAACTCTTGTACC	[A/G]	3R	9928521		I	0	0
AGAMP3_3R_9929300	AAACTTTCCGAAAATGGATGGGCGTTCATCCATTCACGGCCGTGTTTCCACTTATTTGGA[T/G]AAGGTGCAAAATGATGAAAAATACATGTGACGGATGGAGttttttttGTTGTTGCGGGTG	[T/G]	3R	9929300		I	0	1
AGAMP3_3R_10614108	GCAGCACGTATTCAAGGCCACACTGGCCAAAACGGCGGGCCAAAGGGCGATGTCTACCGG[A/T]ATCATCGGCGCGTTGGATGGTGGTGAGTAAAAATGGTGATGCTTTTCGCTCTCGATATAA	[A/T]	3R	10614108		5UTR	0	1
AGAMP3_3R_10617882	CACGCCGCCGTGCTTGTTGCACTCCTCTATCACGTCGTCCTGTATCTCCAGATCCCAGTT[T/C]GGGTTGGTTTCGGTCGCCGGGTCGAACATGTTCGACAGCAGGAAGCACTGGGTGGCGATC	[A/G]	3R	10617882		S	0	1
AGAMP3_3R_10619619	CGACTCGGGATCCTTAAACTCAATGTAGGCGATACCCTTGAAGCGCTTCGTTTTGTTGCA[T/C]GTGATCAGACGGACGTCGCGCACCTTGCCTACGCTCGAGAAGAACTCTTCCAGGTCGCGC	[T/C]	3R	10619619		S	0	1
AGAMP3_3R_10620551	AGAAGATAAGGTCGTATTCGAGAAAATGAAAATGATGCATACGCGCAATTGGCATTGAAC[A/G]GTAGAAGGGTTTAAGTTGATTTTGGGGTGGTGGTTTGAGTTGCAGGACCACGCGCAACAA	[A/G]	3R	10620551		IG	0	1
ABCC11-U-snp1	CTCGTGCGGCGAATGGTCCGGCAGCTGCGCAATAAACTCCGACACGGGCGTCAAATGCTG[A/G]CCSGCGTCCGGTGCCGGCGGTGGCGCAATGTTGAAGCCCTTCATCAACCGTCGCTCCTTC	[A/G]	3R	10715318	rs5489466		0	0
ABCC11-U-snp2	TTTCAACGTACCCCATCGCTTCTTGTGCGATCCTGGACGACTTTTGGAGTTAAACTTCGG[T/C]GCCAGCTTTGCCAGCCGATGGATCGGGTTGTTGTTCTCCCCGAACGAGCTCTGCGACTGC	[A/G]	3R	10715519		S	0	1
AGAMP3_3R_10718060	TGTAACATGTAAACATGATGTGTATGTGTATCACGTAAACAAAAAGAGAAACAGAACAAA[A/C]CACGGAACCACTATAATGATAACGTACGTCTTCTCGCTTGCAAGGACGATTAGACAGTAA	[T/G]	3R	10718060		IGU	0	1
ABCC11-snp3	TCGRACGCGATCGTTACTGTGTGYCGTGATGTGTTTMTCCTGTGCTGCGATCTTTTTCGC[T/C]AAYTTACGGGTGATYGCGATCACGGCTACTATTATCGCGAGGCCTACGA	[T/C]	3R	10721117		S	0	1
ABCC11-snp1	CGTYCGACTCACAACCGCTTCGATCGAGCAGATGCAGCAGATCAAGTCGGATTTGATGGA[A/G]CCRTTTTTYGAGCAGCGTATTGGCGAGCATCGACGGGCGGAGTTGAGCCATATGTGCACC	[A/G]	3R	10721231			0	0
ABCC10-snp1	CTTCTTGGCGAAGCTWGAAATYCGTARCGCCTTGCGATAGATCGCACTGATCAGCCCCGT[T/C]CGAATGCGGAACCCAACGAGGAAGGTACGGTGGAAGTACTGCCCGTTGAAYAGCGCTATC	[A/G]	3R	10728464	rs5451229	S	0	1
ABCC10-snp3	CAGCACGTGCAGRTACGATGTCAACTCRAAGAAGCGCTGTGCATCGACCGCCATCAAGTT[A/G]ACGATCTCHCCAACCGTTGTGTCCTTCTTGGCGAAGCTWGAAATYCGTARCGCCTTGCGA	[A/G]	3R	10728548	rs5450802	S	0	1
AGAMP3_3R_10730453	ACAATCGATCGCACTGTTGATCGCTTCCGTAACGCTGGCACTGGGATGTATTAAGGCGGC[T/C]CGTGAACTGCACAACAATCTGCTGGAAAGCTCGATGCGAATGCCAATGTCATTCTTCGAC	[T/C]	3R	10730453		I	0	1
ABCC8-2-snp2	TCGGGGAGATCGTAAATCTGATGGCGGTGGATGCGCAGAAGTTCTTCGAG[T/C]TGACGTCCTACCTGCACATCTTGTGGTCGGCTTTGCTGATCATTGGGCTGTGTGTGTTTC	[T/C]	3R	10734591		I	0	1
ABCC8-2-snp1	TYTGCGCTACCTGATGTGTCTTGAGCTTGGCTGCCACCACACCAGAGACAGGCGTCATCA[A/G]TATCATCACACCCAGTCCAGCAAACACAGCCGGTCCTAGAATATCATACAGCAGAAACAC	[A/G]	3R	10734705	rs5148101	I	0	0
AGAMP3_3R_10742675	GCGATCACTCTCCGTCAGATCGGGACGTTCCGGTGGCAGTAATAGCAGCATTCGTAAGAA[A/G]CGTATCAGCCGACAAGAGTCCAAAGCCAGCGCCAAAAAGGAAGATCCCATCATACAGAAC	[T/C]	3R	10742675		I	0	1
ABCC8-1-snp2	GCGATGCTCCGACTCCCTGATRAAMCGCTCCTGCTGAGCGTAAGCACGAATCGTCGACTG[T/C]CCACCAATACTCTCCCCAAAGTGTGAATAGATCGGACTACGCGTCACAGATTCCAATCGY	[T/C]	3R	10743395		S	0	1
ABCC8-1-snp1	YATCAGGGAGTCGGAGCATCGCGTGGATTACAATCAGCTCGTGACTTATCCAACGATTCT[A/T]GCYAACCGTTGGTTGGGTGTACGATTGGAAATCATTGGCAGCTTGGTGATCCTGTTTGCG	[A/T]	3R	10743494			0	0
AGAMP3_3R_10869023	TAGCCTTTTATACCCTTATGAAGTTTCCGTGGTTTTGTTTGCTTTGATTAGAGAACTAGG[A/C]CGCCTCCCACAAGTGGACGACCTACAGAACCAGAATGTGACATTGTATaaaaaaaaaCCA	[T/G]	3R	10869023		IG	0	1
AGAMP3_3R_10871110	GCAGTCCGATACATTGTTAACTACCTTAATTAGCATACGACATGCCGTGATGTTTTATTG[A/G]ACCAAACCCTTAGCCGGACAGAACGACTTGCTTACCTTGGTAGCGTGAGAAGTAATACAG	[T/C]	3R	10871110			0	0
AGAMP3_3R_10872121	gggaaattttgaaaatttttccaaaaaatattcaattttttTGTTTTAATGACGCAAACC[C/G]TCTACAAAACACTCCGTTTTGGCAAAACGTACCTTCATTTTGGTGGTTTTGGTATGGGAG	[C/G]	3R	10872121		IG	0	1
JV3-113	CTAATGAGTATGTTATCACTTGTTCAGCGGATTTGCACACGGTGTGGGATGATGAGTYCC[A/G]GTTGAATGTTTGGGTGCGGTCTGGGTRTACTCRGACYTAGATGGTTCCCGGRGCYGGGGC	[T/C]	3R	10873856		3UTR	0	1
JV2-338	GGCGAGCCAATCTTCGGTCGGGCTGGACGATCGGTGTATAAAAGGATCCGTCGCTGGCCA[T/C]ATCAAATCAGAAGTAACCCAAGCGTTCTAACAGCTCATCTAGCAACTCACCAAACAACAC	[T/C]	3R	10878488	rs5112640	IGU	0	1
AGAMP3_3R_11425946	TGCCAGTTCCAACTGTGCGCATAATTCATTTATTATTCTTTAGAAGTGAACGACATTGGG[A/G]GTTGATGCCGGTCTAATAAATGATTTGTAAAGGGAGCGTTTATTTAACATTGATTTAGCC	[T/C]	3R	11425946		IG	1	0
db5451144	CTGTTTTACTGTCGAAAGAGGTATGTAGACCCTCCCCCCCCCTCCCACTTTACTGTTGCA[C/G]AGTACAGCTTAATGTTGTTTTCAATTGTGCTCGACGGATTGTTTTTCTTTTCCCCACTAC	[G/C]	3R	12568468	rs5451144	IGD	0	0
AGAMP3_3R_12571796	AGGAAGTAATTTAATTTTGTCGCCCGAATAAGCGGGCGGCTTAGCGAGGCGAAAAATGTG[T/G]GCCACTTTCGCTTATGGTTCCGAAATCGTTCTCGGCCCATTTTCTTAACCACACGAAGGT	[T/G]	3R	12571796		I	0	0
CYP4H27-snp4	ACCATTTGCACTCGTCTTCAGCTTCTCGATCAGCACATCCGACTGGTGGTTCATGATGAC[A/G]AGGAAATCCTCCAGTATTTTGAAATGAAACGCTGGCGTTATGATCTTTCTAYGCTGGGTC	[A/G]	3R	12572874			0	0
CYP4H27-snp2	ATTTACAATACAACTTCACCCAACTACGGTATCAACTAACGCTTACTCTTTCACTGCCAG[C/G]ACGTATTCTGAGTTCGGATGCTGTTGCGTGTTGAGCTTGACACTCATGGCAGATTCGGMG	[C/G]	3R	12573045			0	0
CYP4H27-snp1	GAAGCGTCTATTCTCGMTTTTTCGCGAATACAAATGGGCATTCCAGTTTACCAAAGCCCA[T/C]CGYCGTCARCGAGAACTGGTGAAAGTGATACACGATTTTGCCYATAARGTRATCAGCGAT	[T/C]	3R	12573203			0	0
AGAMP3_3R_12575487	ATTAGCCAAAAGGCACATTTATGTTCCAGACAAAACACTCACACACACTGCTAAAATAAC[A/T]GGTTTTGTTGAACGCATATTAACGGTTCTTCTTTCTGCCAGGTATTTGTTTATATATTCA	[T/A]	3R	12575487			0	0
Agama5-2-snp2	GGATGTTTACATGTTTGTTTACAGTTCCACGWTTCCGAATTCCGTACAATTCCACATTCC[A/T]TAGTCCACATTCCAGATTCCAGTGATTCGCAATTTTGTTATCGATTTAAGCTACGTTTTA	[A/T]	3R	13344314	rs5585874		1	0
AGAMP3_3R_14802742	GGGTTGCCCTACAGAGAGCAATGGCTGTAACAAAAGAAAGAACAAAAACGCACACACACA[T/C]ACACGCCTCCCACAAGGAAGCGCGACGACGACGACTTTTTCGTACCTGGGGCCTGTTTGT	[A/G]	3R	14802742			0	0
AGAMP3_3R_14806678	TTTTATAACATAACAGTGAGCAACCTACATGGTTTGCATGCTCCTCGATGCACCTGGGTA[C/G]AAAGGAGTTCAGCCCTAGTGCACCTGAGGGCCTGTTACCGTAATATACACAAGTGAGAGT	[G/C]	3R	14806678		IGD	0	0
CYP307B1-snp1	ATGAAAAAGTCCGGCTTCACCAGCCGGCCCTGCTGCAGGAAGCGCTCCGGCCGGAAGCG[T/C]TCCGGCTCGTCCCACAGCGCCGGCGACATGCTCAGGTCGTAGTTGTTCAGGAAGATGAGC	[A/G]	3R	14807399	rs5589341		0	0
db5604628	CGCGCCTTCTGCACCTCCGACCAATCACAGAATGCAAGAGCTGAAGCGAGAGAGAGAGAG[A/G]CAAATTCGACATTAAAATCACACCACAGAGACAGGTCAGGGCGCAGTCGAATGCGGACAG	[T/C]	3R	14808357	rs5604628		0	0
AGAMP3_3R_14809085	CTTCAAGCTGAATGAGCACGCACCAGCACACACATACACACTCAAAGGTAACAGTGTAGA[A/G]CACGCACTAACACCTTAGTACACGTGCACGTATCCACATAAACACCACCGCACGCACACG	[T/C]	3R	14809085		IGU	0	1
AGAMP3_3R_15231713	ACCTGATTAAACAAACGCAAAACATGCAACGAGACAGAGGAAAGCAACATACGCATTCTA[A/T]TGTGAAGTTAAAAATAGTTTGAATGAGTCCTGATGATATTTATGAAATAATGTTCATATA	[A/T]	3R	15231713		IG	1	1
AGAMP3_3R_17138878	GAGGACGTGTTTTGGGAGCAGATCGTAACGGCGTGCAGCAAAACGTGGCCACTGATGGGG[T/C]ACTACGACGATCTGATACTGCGCGTGCAGCAGAATGGCATCCTGCGCTACTGGGAGCTGG	[T/C]	3R	17138878			1	0
AGAMP3_3R_19045029	CGACGACCCACTGCCGGACGATTTGGTGATGTAGTTGTCCTGGCTAATGAACTTGTTCAG[T/C]GGTTCCTTCTTCGGTGGCACTATTTCCGCCACGTTCGGCAGCTTCGGCACGTCGGCGAAC	[A/G]	3R	19045029		IG	1	1
AGAMP3_3R_20944518	CACGGAACGACCAGGCAGACCGTTCGGTGGACAACGGCGATAACTCACACCTCTCCGGTT[T/C]CCCACCCTTACCCGCCGGTGATAGGATCGCGTATCCCCAACCATTACCGGGGCGAAGCTT	[A/G]	3R	20944518			1	0
AGAMP3_3R_22846491	TGGATTAGCTGCTTTCCGGTTTCCTAACCAAGACGGTCACCGAAAGCAGACAACAAACCG[T/C]CAGAGTCAATGGAACGTTCCGTTTAATGTTTTCCGTCGCGTTCGTGTTCGTTCTGCTTTT	[T/C]	3R	22846491			1	0
PX1-U-snp2	ACTCCACGGGCCGGCCGCATCCGGAATGCCCTGCGGTCGYCCGTCGGCGAATATTTTGCT[A/C]CGATTGCCTCCGATCACGACGGCCGACCCCAGGATGGGYACCAGATCGGCCAGACAGAGC	[T/G]	3R	24359813		S	0	0
PX1-U-snp1	CCAGTCGCTCCACTCGTCCACCTCCAGCTCGACGTCCGAGTTGTTGGTGCGATAGATGTC[T/C]TCCCCCTCGGGCGATAACCGTTCGGGCATGGCGTTGAAATTGTCCGGCCGCAGTAGRACG	[A/G]	3R	24360032	rs5403907	S	0	0
PX1-D-DB-snp2	ACTAATAATCATTCCACTTCTTTCAACC[A/G]TTGCAGCATTTCCGTAATGAGTTCTTAACGATAGTCTGTAAACT	[T/C]	3R	24369487		IGU	0	1
AGAMP3_3R_24751681	TTGGGGGGGAAAAAGCCACTGTCTAAAAGCTGTCATCCATTCCATGCCAGTTAGTGTCGT[A/T]CGTAACATTTCTATTCTAAAAATCTTCATCATGTCTTTGTCTGCGTTCCCTGAAATTggg	[A/T]	3R	24751681	rs5386669	IG	1	1
DOPA-U-snp2	GGTTACTTCAGACGCGCATGATAAGTTCCTATGTAGYAACTGATTTTTTGCAGGAGCATA[T/G]ATAAAGATTGTCCTTACCGATGTGTGAGAACAGTATTCGGATAACTAGTGTAAGGATCTA	[T/G]	3R	25549780			1	0
DOPA-U-snp1	GTCCTTACCGATGTGTGAGAACAGTATTCGGATAACTAGTGTAAGGATCTAGCCAGGAAT[T/C]CTCAAAGTTTGCAGATAAGGTGATATTGAGATGTCCGACATTAGGTGATCGCCGCTGTAA	[A/G]	3R	25549850	rs5335210	IGUD	1	1
AGAMP3_3R_25554663	CAGGTAGAGCGGATCGACGTTGAACGCGTTCACGATCCAGTACGGTTCCTTCAGCCACAT[C/G]GCGCTGCAGTCGAAGTTGACCAGCATCCACTTGTGCGGGTTGAAGTTGAACGAGTCGGCC	[G/C]	3R	25554663		S	1	1
DOPA-snp1	CGTGGTGGCGACGCTCGGCACCACCAACACGTGCGCGTTCGATCGGCTGGACGAGATTGG[A/G]CCCGTCGCCAACCAGTACAACGTGTGGGTGCACGTCGATGCGGCGTAYGCCGGGTCGGC	[T/C]	3R	25554828		S	1	0
AGAMP3_3R_25562656	GCTGGCCGGTAAGCGGCGTGGAAAGGTTTTATCGTCACGTGATTTAAGAGATTGGACGGA[A/G]AATGGGTACGCCTGGTTGCAGTGGTAGACGGGGTTTGGCGATTTAGCACGGTAGAGATTC	[T/C]	3R	25562656		IGU	1	1
AGAMP3_3R_25563295	GATGTGATGCTCCAGAGCGCACCAGACCAGCACTTGAGCGCCTTCAATAATGGCCAAGTT[T/G]AGCAAGGTTTCGACTACAACCTGGACGTACGACGGAAGCTGACGCCGATATTTGGCCGAA	[T/G]	3R	25563295		S	1	1
DOPA-D-snp1	ATCCTCTTCTAGAGCTCGAATTAGCCAACGCCTTCAATAGTACGG[A/G]CGRAAGGCTGTAAAATCTTTAACAAAAAATAAAACYGTCTTCACCACCAGTGTCTGAAAA	[A/G]	3R	25563843		5UTR	1	1
DOPA-D-snp2	ATTTACTTACATATCTACAAAGTTCCGGTGCCAAATGCCSCTTAACGAGGCCGCATTAGA[C/G]CGAAAGAAATGTAGCCCATTTCTTGCCGAAGTAGAGTAATTAAGATCCACTTTGCACCAT	[C/G]	3R	25564159			1	0
AGAMP3_3R_26645961	GAAGGAGCGTTCTCAGCTGCACAtgtgtgtgtgtgtgtgCTGATCTTGAAGGATCTGCTG[T/C]GGACACTTTTACTAGGCTGGAAATATATTGCCATCCACCCGGACTCGCATGGTGGGAACA	[T/C]	3R	26645961		IG	1	1
AGAMP3_3R_28364846	GGGCTGTCTGCTGCGTAAATGGTGATGGTCTATGTGTGTAAAGTCAATTTGCACCGTATG[T/C]TGAAGCGTTGATGAACTGTAAACCGTGCACCATGTTGACGATATTTGCCGATCAATATTG	[A/G]	3R	28364846		IG	1	1
AGAMP3_3R_28590444	AGAATTACGCGAAACGCAACAAAACAACAATTCCATTAGTAAATCATATCTGTACCTCCT[T/C]CCCAGATGTGTTAAAGGTTAGCTTTATTTTCGTTCgtttgtatcgttttttgtgtatttt	[A/G]	3R	28590444		IGUD	0	1
AGAMP3_3R_28591271	TTATTGTTAAAGTGAATATATTACTCATGCCGTAAAAAACATTAACAAAGTTTAAATCCT[T/G]GTAGAAAGGGGATGATGGTACGACCACACGCGCAGCAAACGCTGTATGAAGCAACGCAAA	[A/C]	3R	28591271		IGUD	0	1
GSTe6-snp3	GTTCGTGCTGTGGGACAGCCACGCCATCATGATCTATCTGGCGCGCCGTTACGGTGCCGA[C/G]TCCGGCCTCTACACGGAMGAGTACGAGCAGCAGGCCCGCATCAATGCGGCCCTCTTCTTC	[G/C]	3R	28594053			0	0
GSTe6-snp2	CTCTCCGGCCGCTTTAAGYCCYCGTCCCATCACCTCCCCGTAGTACGGCAACTTCGACAA[T/C]CGTTCCATCCAGGCGAACGTTTTGGGGAACTCTTCCGCCGACGGTTTCAGCATCAGGTGC	[A/G]	3R	28594374	rs5730884	S	0	1
GSTe6-snp1	CATCTTCGTCCCTCACTTCACAGCGTAGAGTAAGTTCCACTGCCTACTGCGCTTCTAGTT[A/G]CCATCACCACCACCACCACTGTTCTTGCTACCAAGCGTCTGCATCAGCTCTCCGGCCGCT	[T/C]	3R	28594482			0	0
GSTe5-snp1	GCTTCCCGCAATGTAATCCTCCACCAGRGCGTCGTTCAGMAGCTCGTACCCTTTCTTCAT[A/G]TAGTCGATTTTGTCCTGCGGCACTTCCGCCGATCCTTCGTACAGTATCGGTTCCTGGAGG	[T/C]	3R	28595291		S	0	0
GSTe5-snp2	GTCCTGCGGCACTTCCGCCGATCCTTCGTACAGTATCGGTTCCTGGAGGGAAGCATAAAC[C/G]CCCATWATTASACAACATRTTCTTTTTGCATGCCAAAAACAAACAAAACTTACGAAATAG	[C/G]	3R	28595363		I	0	0
GSTe5-snp3	AAAACTTACGAAATAGAACCGCARCCGAGAGAAYAGYACGCCCGAATCGAAGTGCAGGCC[A/G]GCGTTTACCTTCGCCCGAGCGATTGGATCTTCCGGATAGAGGGTYTGACCATCCTTYCCG	[T/C]	3R	28595468		S	0	0
GSTe4-snp1	CTTGGCACGGTACAGCTGAGCGAGCTCTTCCGCACC[T/C]GCCCGATTCGTTGCCTCGTAGTACGGCAGCTTGGCAAGGCGTTYGACCCAACCGGCCAGC	[T/C]	3R	28596140		S	0	0
GSTE2-436	ACCGGTTCCAGTTCCAGCATAACGCCAAGCATTTTCCAACCCCTTCCACAGGAACGTATC[C/G]TGTTCTTCGGCAAATCGGACATCCCCGAGGATCGCGTTGAGTACGTGCARAAATCGTACG	[C/G]	3R	28598062		NS	0	0
GSTE2-331	CCCGTGTAAATTCGGCCCTGCACTTCGAGTCCGGCGTACTGTTCGCCCGGATGAGATTCA[T/C]TTTYGTAAGTGACGTGACCTGTTTTTNCCCYTAAAAAGACTGATACCGGTTCCAGTTCCA	[T/C]	3R	28598167	8166	NS	0	1
GSTE2-123	TGAGAGAAAGTGATGAAGAGAAAGTTAGAAAGAAAGCAATTGGTATGSATTACATWACCC[A/T]TATGTGCACAGCTAAACCCGCAACATACGATCCCGGTGSTGGATGACAACGGTACGATCA	[A/T]	3R	28598375		I	0	1
GST10_SM	GTGCMGTGGAGCTGACGGCCAAAGCATTGGGCTTGGAGCTGGAGCAGAAGACCATTAATC[T/C]GCTAACGGGTGACCATTTGAAGCCGGRATTTGTGAAGGTACGTAAAGGGATTGAGAGAGA	[T/C]	3R	28598474		NS	0	1
GSTE1-2-260	ACGCACACAAMAACACCAWCCCCAAGTAATGCTTTATCTCGGGCCCTTCCAACGAAYACA[A/G]TCACACATCCGAAGCATGGGGCGTTTGCTATGCTTGGGGTCGWTGCTACAAACATBCACA	[T/C]	3R	28598715			0	0
GSTE1-2-182	CATAAAAAACAGGAATTCGCTTCTGCTTTTATGTTGCAGTACGAAGAACCGGAATGAGTA[T/G]GAAATAAATTCGCCGACACGCACACAAMAACACCAWCCCCAAGTAATGCTTTATCTCGGG	[A/C]	3R	28598793		IGUD	0	1
GSTe7-snp4	GTGTAGYGCCGTGTGGACCCGGGCCCGCCKTACCAGCTCGCTCGGATAGAGACCGTCGTC[A/G]CGGCCGTACTTGCACACGAGATAAATCATGATGGCATGGCTGGCGGTGATAACGATGCCA	[T/C]	3R	28600825	rs5574052	S	0	1
GSTe7-snp2	TGGAAGTACGATTTGCCCGAATAAATGACCGGTTCCTGGAAAGGTACATAATCATCCTCA[A/G]TMTCATCGCCGTAYTGTCCTGTGAGTCTGGGTTTACTAACAAACAGAAAACTTAACCGCG	[A/G]	3R	28600968	rs5574577		0	0
GSTe7-snp1	CGGTACCACACCGACCAGCGTGGCAATGCTGGAGATGCAGCTAAAGTCGGCAATCGTGAG[A/G]CTCTCRCCCACCATGTACTGATCGACGAGCGAATCCTCCAACAAGCGGTACGCCTTCCGK	[A/G]	3R	28601110		S	0	1
AGAMP3_3R_28601261	GCCTGGATGCGGCGCATGCAGGAGCTGCCGTACTACGAGGAAGCGAACGGTACCGGGGCG[A/C]TCGAGCTGGCCGAGTTTGTGCTGGGCAAGAAGGAAGCCAATGCTTCCCAGTTCCTGTGAC	[T/G]	3R	28601261		NS	0	0
GSTe3-snp2	CTGTACAACCAGAAACTTGGCAAGGTTTAGATCYGGCWTCACGTCCACGGCACATGCACT[T/C]AGCTMTGTCTTCTCAGGTCAAGAATAAAGCTTTCCAATTTGCATTTAAAAATCAAATAAA	[T/C]	3R	28601428			0	0
GSTe3-snp1	GAAGCGGCTGGAGCAAACGATGCCCCACTACCAGGAGATCAACACGGACCGGGCCAATGA[C/G]GCGCTGCAGCTGTACAACCAGAAACTTGGCAAGGTTTAGATCYGGCWTCACGTCCACGGC	[C/G]	3R	28601487		NS	0	1
GSTe3-D-snp1	CAGCGGCGGCTCATCGCGGCTTGCGAGCGGTGAGGATGAGGTCGAGTGGGGCGAGACGAG[T/C]CCCAGCGGTGAGCTGGAYAGTGGACTCGATTGGTTGCGCAACAGGCAGATCTTGAGGCCG	[A/G]	3R	28607685			0	0
CYP4C35-U-snp1	GACTCCGAAGCACGATTGGATCACGTTTGAAGCAAAAATTCATTTAAAATGCTTCACCAC[T/C]GGTAGCCGTGCRCGAAGTWGTGTGTTCGTAAGCACCGTTTTCGCCGCAGCACAGCAGTGT	[T/C]	3R	29197123			0	0
CYP4C35-U-snp3	AGGTCCTTGGGTCCACTTTGACCGCGCAATGAACTTGCTAGCTCCGTCCTGTGGAAGGGA[T/C]GGGCCTCCTCCTGGAATGGACGTTTTGATTTCAAAAGGTTGTGCAAAACTTTCGCACAAA	[T/C]	3R	29197422		IG	0	1
AGAMP3_3R_29200505	AAATCAGTCAGAGGGAATGACAAAAAGGCTTTCAGAAAAAGGTTCTCAGCAGGGAATGCG[C/G]AATTTAAAAGTAAATTAATGTTGTTTTTTTGTGTGTGTCATTCTTAGGAAACGTCAAAGC	[G/C]	3R	29200505		IGD	0	1
AGAMP3_3R_29200867	GCGGTTACGACACGCGTGGCAAGATTAATGATAATGTGTGTCTGCAGGAGCATGGCACGG[T/C]AACCGGAGGCACTGCTGGCATCatgctgatgatgctgatgatgatgatgatCGGCGTCGC	[A/G]	3R	29200867		IGD	0	0
CYP4C35-snp3	GATGCGTTTAAAATGGGAAAACTCAYCCCTCTTRCGATAGGTTATTCAAGAGAGGCGACG[T/C]ACATTGGACCAGCAGCACGCAGGGGAGCGCAATCAACCGRARGCAGAGGGTGATGGTCTG	[A/G]	3R	29203405		S	0	1
CYP4C35-snp2	CTGTCGGCGACCCAGCGCCGASCGGCRGAATGTCCAGTCCGGGTGCAGCCAGGGACGCAC[C/G]AGCCGCTCCAGAAACAGCGAGCTTAATCTGCAACGACCAACYAAAGCTCATTAAGCTGAA	[G/C]	3R	29203614			0	0
CYP4C35-snp1	AAGCTCATTAAGCTGAATRTCTCGCGGRGTGCGGYACGCAAGGGCTTACTCGTAGACGGC[A/G]TTCACGTACGCGTTGTCTTCGCCGGCCGTTTGTGCGTGCACCTGCACACCCATTGCCGTT	[T/C]	3R	29203718		S	0	1
CYP4C35-D-snp2	GACTTCCGCGCAGCAGTTCATTATCCCCAGTAGCTTACGGGTGGGTTTGGGAGTCGAAAG[A/G]YACCAAATTACTGCTTTCGGCCAGAGGAAGGAGTGGCCCACCACTTTTGYGTGGATGAGT	[A/G]	3R	29207770		IGU	0	0
db5363014	GTGTGCAAATAAATCATTCGCCAACGAAACCGGGAGCTGCTTAATATTTGGAACACATTC[C/T]GGCCATTATTTATAGGCATCGGTAGCACCCTTCGGTGTTAATTCGTCATCACATAAACAA	[A/G]	3R	29218778	rs5363014	IGU	0	0
AGAMP3_3R_29223913	GCGCTGCCTGAAGGAAACGCTGCGCCTCTACCCGTCCGTGTCGTTCTTTGGCCGCACGCT[A/G]AGCGAAGACATACAGTTCGGGCACTATCACGTCCCGGCCGGCACGGTCGTCGGTGTGCAT	[A/G]	3R	29223913		S	0	1
db5402540	GCTTTAGGCTTTTTTGCTTGCCCTTYCCATTGGTTCCTAACTAGCTACTCCAAGACGCAA[C/T]CGCAAGCTGCTCTAGTTTCGCTTCGGAGAGAAATTCCGGTTCGAAGGACCAAAAAATACC	[A/G]	3R	29226245	rs5402540	IGD	0	1
db5404238	ACCAGTACTCCTCCCCAGTGTTGCCGAAATGGATTGGGACGACTCAGACCAGCGGCTTTG[A/C]ACAATCAAAGGGACCAGCGGTATAATCGGACCACCACGCCTTTCAGCTCCGTTCGGTTTT	[T/G]	3R	29226631	rs5404238	IGD	0	1
db5404697	GTATAATCGGACCACCACGCCTTTCAGCTYCGTTCGGTTTTGGTGGGGCACAACAACGGG[C/T]ACCGGTCACTGGGTATCATTCGTCATTGGATAATTAATGATGCGTGACGCCCGAATGTTT	[T/C]	3R	29226711	rs5404697		0	0
db5635071	AAATGGGCCAAATTTTTCCAAGCTTTCCCTTCCACTCCCCTGTTGCTGCCTGATGATGCA[C/G]CAACGCTGGAAACAGGCACGGGGCACGAGGGAGCGAAAATTGTTTCAATCTTTTGTAAAA	[G/C]	3R	29376537	rs5635071	IGD	0	1
AGAMP3_3R_29386442	AGCAACTGCCCCGTTGACCGGCTGTCTGTACTAAATAAACTCGAAGCGAGAAGCGTTCGT[T/C]GGTGGGAAGCTCAACATAAGAAAACAAGCGGTATCAGCGGCACTCATCATGCCTAGAAGG	[T/C]	3R	29386442		IGU	0	1
AGAMP3_3R_29389927	AGAACCAACCATGAAgggggtgggggggAGGGACTGTGATTATTTGCTACCCTAGAATAA[T/C]TTTTACCAATCCCCCTGCTTTCCAGCTGAGGCCTTTAGACCCATTAGGTAGGTGACAAAA	[A/G]	3R	29389927		IGU	0	0
AGAMP3_3R_30462790	CCTCTCTCCCCACGGCGGCTCCACGAGGAGGGCGGCTCCACGAGGAGGGGGGAAAAATCC[A/G]AATCCTCTTATCGTGGAAAAATCCACCGCAAGAGGAAAATTAATGCTAACGCATAACAAT	[A/G]	3R	30462790			1	0
AGAMP3_3R_31556196	CGGGGTTTGCAAATTCCCAGACAAAACATTTTAAAAGAAGGACATTCTTCATCGCGACAA[T/C]TTCATCATTCATGTCCAGGTGGAACATTTTTCAACCCATACAGTACCTACAGTCCACTAC	[T/C]	3R	31556196		IGU	0	1
GSTu3-snp1	GGGGATGGAGGGCTACGCCAACGTTAGCGGCTGGTACGAACGGTGCCGCGAGCTGCCCGG[A/T]TTCGACGAGAACGAGGAAGGCGCTAGCTTCCTTGGAAATGCGTTCAAATCGAAGCTCGAG	[A/T]	3R	31558860			0	0
GSTu3-D-snp1	GCGGGAGACGCTAACGGTCCTTTGCTGTTCGCAACAGGAGATGGCAACGGGTTGGCCTTG[T/C]TACTCGCGGCAGGAGACGGCAGCGGACTGTTCTTCTTATTCGMACCGACGGCCGTTTGTA	[T/C]	3R	31562806	rs5155069		0	0
AGAMP3_3R_31563774	tcctgcactgctgcgtggctgATTGTCCAGCGTGGGCGATAGCAGCGGTACATTGCGCGG[T/C]GAAAAGGGACTAGAAACGCCCGCCGTGGCAAGCGCCGAGGCTGACATTTGTTCGGTCAAC	[T/C]	3R	31563774		IGD	0	1
AGAMP3_3R_31782717	CTGTCCCCCCTTGATATTTGTCTCGGGTGGTCCGTGCGGTCGCTGAGGCTGTTGTCCTTG[A/T]GTTTGCTGTGGCGGGGCTTCTTCCTTCAGTTGTTGGGATGGAAGTTCCCTAATTTCTTGG	[A/T]	3R	31782717		S	0	1
AGAMP3_3R_31838320	TTGTCGCTGCTTATTTGTCTTCGATCGATGGTGGTGGTTCTTTTCGCGGTTGGAGGGACA[A/C]ACAGCATAAAAACGTCCAAAAAGTGTTACGGTTCCGAGTAGCAGAAGAAGAAGCAGGAAT	[A/C]	3R	31838320		IGD	0	0
AGAMP3_3R_31846406	TAGAATATTGCACTGCTATTAAAATGGCGCTTGGTTCACTCCACTCCTACCGTCGTACTA[T/C]CTTTACAAGAAAAAAATACAAAAGATAAAACCCTCCCAACAAAATATTCCATTTACATTC	[T/C]	3R	31846406			0	0
AGAMP3_3R_31846485	CAAAAGATAAAACCCTCCCAACAAAATATTCCATTTACATTCCCTCCTTCAAAAGTGGGT[C/G]GCACTGGACGTGGTCCAATCGCAAAGTACCGGATTGTCATTCGATCGCTTGATATCACAA	[G/C]	3R	31846485		IGUD	0	0
CYP9M2-snp2	GMAGAWGGGYGAAGGGAAGATGARCTGGRCTGAYATCGACATTGCCGGAGCGGCTGCTTC[A/G]TTCTTCTTCGGTGGCATCGAGACGACGACGACGCTGCTGTGCTTCACCAGCTACGAGCTG	[A/G]	3R	31848138			0	0
CYP9M2-snp1	CGCCTCGTCTTCRTGCTTCTCCGCMCCAAGCGTGTTCTTGCGCGCCTGCAGCAACAAGTG[A/G]ATAAAGTCCGGCCGGGTAATGCGATTCGTCTCGCGCAGCTGAATGTTTCGCGCCACCGC	[A/G]	3R	31848306		S	0	1
db5702303	GTTGTTCGCGACTGACGCAACCGTGCCGAAAGAAGCGACCAATAACAGTGCGAAAACGGT[G/T]CCGAAATTCTGCGCACCATCACACGCAAACATACGCATTAGAGTCGCCCAAACACTAATC	[A/C]	3R	31849222	rs5702303		0	0
CYP9M2-D-snp1	TTACAAAAACGCGAGTTATTCCATTTAATTTTTATTTCTTGTTTTACCAAGGACTGCGTA[T/C]ACATATTTTAGAATCGTWTGATTGATTGATTTTGCTACACTATTCTTYTGAAATAATCTA	[T/C]	3R	31853513			0	0
AGAMP3_3R_32376951	TCATGTTGTTCCGGCCGCGTGACTACCGGAACGCACTGTAAGTATTTGGGAAAGGTTTGG[A/G]GTAGCAGTAACAAGAGCAAGAACAACTCAGGGAAGTGGGCCACCGCCGATAGGATGACTA	[A/G]	3R	32376951		I	1	0
AGAMP3_3R_34267547	AACAATACTGTGGGGTGCACTCGAGCAACAACGGGTAGTGTAGTGACTTATTGTCGTTGT[T/G]TTGGTGGAGTTCTCCTCTCCTCCGATTGGTAGGTTAGGGAAGATGAAGGATGTACAGGTT	[A/C]	3R	34267547		I	1	1
GABA-B3-snp4	GTAGTGCCTTGAGCGGCAGAGYTCCACCTGGGGAAGGAACACCACACTCCGATCGGTGGT[A/G]CTGATCTCCAGGGAAAGGTTGTGCAGATGCCGTTCCATCGGATCGGCCGCCATCCAGAAC	[A/G]	3R	35052886		S	1	1
GAMBIF-288	ggctccttcgcgtgaccgaatccagctgcaaagtTaaatgggaattaaat[T/G]tccgaagttcgggagagctcgagcgaagYgaacttacttctgaatggatc	[A/C]	3R	35060942			1	0
AGAMP3_3R_35603981	CTTGCACTGATTGCCATCATCCTCCTCGAAGAACGCCAAATGCTTGTACAGCGACGCAAT[A/G]TCCTGCAGAATCTTCGCGTACTGTGACGCTTCCGTTTCCTTCGTGTAGTACTCCTTCGCT	[A/G]	3R	35603981		S	1	1
AGAMP3_3R_35607086	GAGAAATAAGAACACACACACACTCACTCAAGCTTCTTCTCCATTGAGATTCGGAACGTT[A/T]AAGATCAGCAAAAGAACCGTAAGAAATAGGAAacagacagatagagagataggcatgagc	[T/A]	3R	35607086		3UTR	1	1
CYTC-D-snp4	GTAGTCCGCCGTCTCSAGRTARTTCAGCATCTCCTGCACGATCTCTTCCGCGTTCGACCG[A/G]TCGCACATCGCGTACAGCAGATCGACCGCCTGCTGCCGSACCGACACGTCCTTCTCCATC	[A/G]	3R	35611173	rs5409640	S	1	0
CYTC-D-snp2	GGTGGCGATYCTGGCGGAGAAGTACGCGACGGACTACACGTGGTACGTGGACGTGATACT[A/G]AACCTGATCCGTATTGCGGGCGATTACGTGTCGGAGGAGGTGTGGTACCGCGTGATCCAG	[T/C]	3R	35611320		S	1	0
AGAMP3_3R_36165977	AAACACTCCTCTAAACCTCTAAAAGCGTCCAGTTACTCTAATCCTCTTGCGTAATGCCTT[T/C]CGCATCTTGATAATTTATTTCCACCGATAGTTATTATCCCGCTCAGTTTACCATAACCGT	[T/C]	3R	36165977		I	1	1
AGAMP3_3R_36679169	TGTTTAGTTGTGAAATTTGCCATAGTAGTGCGACAAACAATCGTTGATAAACTTGCAGAC[T/G]GTGTAGACGTACTGCTGCGGGTGGCGGATGTAGTGCTTCACGTGCTCGGAACGCTCGAAG	[A/C]	3R	36679169		I	0	1
AGAMP3_3R_36684673	ATGTTAAAATTTTGTGATAAAAATGATGCAACGGATGGTCCACGCTAAAGGTAAACAAAC[T/G]TTAAGTTCAAAGCTTTAATCTCTCGACCTTCTCGGTCTATTTATTTTCCAATTAGCCGCA	[T/G]	3R	36684673			0	0
AGAMP3_3R_36686802	tgtgtTGCAAATGTGCGTTTCGCATAGTTAACATAGCTGCGGTGGCGTTTGCGCTTCAGT[A/T]AAGAATTTGTGCGTTTATCACATTaaagaaaaaaaagaaaggaaaaaTTACAAACAGCTA	[T/A]	3R	36686802		IGU	0	1
AGAMP3_3R_36690850	AAACGAACATATCTGCCACCAATTATGGGAAGTTAAATTTCGCCCTCGAGGAGGACAAAC[A/C]GTGGAACTTCAAAATCTCCAGCTGGAACGTGGCCGGACTGCGCAGCTGGGTTGGCAAGGG	[A/C]	3R	36690850		NS	0	1
AGAMP3_3R_38076728	ATAACAAACAACAATAACTCACTTATAAATCCATTGTCATTTCAAAATGCAATACCTGGG[A/G]TTGCCTCAGGATCTTCAATATATAATAATCCAGTGCAAAAACCAACTATTAACACTGTTC	[A/G]	3R	38076728		IG	1	1
CYP325C3-U-snp1	AAGGGAWCCATGATGRGTAGATGATGAATGATRGASTGATGGGGAAGGAAGTAGTTGATG[A/G]GTGTAAGCAAGGTAGTCATGTTGGTTGGTTGAAAGTATCAGCTTTCATGCTCTSATAGAA	[A/G]	3R	38982941		IG	0	1
AGAMP3_3R_38993216	aaagaaaaaaaaTCGATAACATGATAACAAGGACGGTAAGGTGGTGAGCGCTCCTTAACG[T/C]ACAGAATCCGAACAACCTATGGACAGAGGTTTGTGAATGGTTTATTTTTCGGTGGGTTAA	[T/C]	3R	38993216		IGD	0	1
CYP325C3-D-snp2	TYGTTACTGGTTTCGCGTTTCCAAAATCCAATTCATAGCGCCTCGCGTGGTTTTTCACGC[A/T]GCTAGCATTCTAACCATCCTAACCAAACGATTGCTGGGCTAGGTTTAAATCCTGTCTGGT	[T/A]	3R	38995263	rs5707511	I	0	1
CYP325C3-D-snp3	GAGCGATTTAAGGCTTTACTGCTTATCCAGCATGTGTGYTTGGGTAAAAAGGGATGTGAG[T/G]TGGATGAGTAGAGWGCTGCCAGTGTATTATGTAGCTCAGAGCTCATTTGTTACATTTAAC	[T/G]	3R	38995520		I	0	1
AGAMP3_3R_39959677	TTTCAGTACCAACTCTGTACCAAGCCAACACTGACGACGATTCGAAAACACGAAAGTGGA[A/G]ACTAATTTCTGAATGCTTCCTAACATAAACAAACTAAATTTGGTTTGCTTTAATCTGAAA	[A/G]	3R	39959677		I	1	1
AGAMP3_3R_41876174	GCCCAAGGTTGCCAGGTTGGGCGAGATGCATTCCTAATCACGCCACGCGGGCGAAATATT[T/C]GGCCGAACAAATTTTGTAACGCATGGGAACAAGCGTGAAACAGATTTCTCAAATAGTCCG	[T/C]	3R	41876174		IG	1	1
AGAMP3_3R_42052169	GTGAGTGTGAGGTTTAGCATTTTTTCTAGAACGTAAGGAACATTCTATAATACAAGAAAA[A/C]GAAACCCGGCTTTTCCGACCCACCCCTACTTTCTGTCTAGGACAATTTGCAAAACCATGT	[T/G]	3R	42052169		IGU	0	1
GRX-3-snp1	ACCGCTCTCCACCAACCATCATCATCATCATCATGAAGCACGCAGATAAGATTAATCATT[A/G]MWKAATGTCTCCCGGAGGAATCGATATGCCCGTGCCTAGCGGACGTTGATGGGTCACCGC	[A/G]	3R	42055672		I	0	1
GRX-3-snp2	TGTCTCTTTTTTCCATACAGCCGCACCTGTCGTCACGAAGGCGTTGGAATCTGCGCCGGA[A/G]AAGAGCCACTTCATCACGGTAGAAATCGAGCGTCCATTGTGAGTAAACGCGCAAAGCGGA	[A/G]	3R	42055814		S	0	0
AGAMP3_3R_42057779	CCGGTCGCCGATCGAAAACACCGTGCTCTTGTTCTTCAGCGAGCTCGTCTTGGAAAAGAT[A/T]CCCTTCGGCCCGGAATCATCCAGCCCCATCAGATCGTCCTTCGATACGGCTTCCTCGAAC	[T/A]	3R	42057779		S	0	1
AGAMP3_3R_43784281	CAGGTTCCCACCACACCAACACGACACACTATCGAAAAACAATGAGCAGTTGTTTGTGCC[A/G]AGCGCATGTAATTAGAAGGTAAACAACATTGCACTACAACACACATCCACACGGTGCCGT	[A/G]	3R	43784281		I	1	1
AGAMP3_3R_45682475	ATTATTCTCACAGTGAAGGCATATTCGTTCGTCGTAGTTGTCCGATGTTCATTAACAACA[T/C]TTACAATAATCTAACCAAATCGAGCCTAGAGATAAATCGTAGAAAGTCCTCCTTCACCAG	[T/C]	3R	45682475		IG	1	1
GSTmic3-U-snp3	CAATCTTTCACTCTCTACTCCTCTGCTTCCRCGACACACCTGTTAGTGTCGTGCAGTTTC[T/C]GTTTGTGGTACATTGGAAAGCTTTTGCGAGCTCTGGCCTACTATTGCACGGAACCAATAG	[T/C]	3R	45849667	rs5055883	IGU	0	1
AGAMP3_3R_45850885	GTGAGCAAATGGCATAAATTATGATGATACTCTCTGTGACCCGTGTCAGCCGTGTTGAAA[T/G]AGTAGGAGAATGATAAAAGCTTAACCACCGGCATCATAATCGGGTCATTCTCTCGATGGT	[T/G]	3R	45850885		IGU	0	1
AGAMP3_3R_45852632	TTGGAAAAGTAGAATTCTAAAAGATGTTCAGTAATTTGTATACGAAGATAGGAATTTTAA[C/G]ACTAGCaaatgttttcacaggccggatttagtgttgaggcaggccgcatttggcccggga	[G/C]	3R	45852632		IGU	0	1
AGAMP3_3R_45853824	TTCAGGTCTTTTCGAATCCGGAAGACGTTAAGCCGGGTGGCAAGGTTGCGTATGACGATC[A/C]GGATGTGGAACGTGTTCGACGGTATGTAACGGCTGCCAGCTGAACCTTTGCAATGTACAC	[T/G]	3R	45853824		NS	0	1
GSTmic3	CTGAATTGCAGCTYCGTGGGACAGGAGGGATWCGAAAAAATTCCAGCACAACCACTAGCT[T/G]CAATCTGACACCAAAACCATCTTCCCTTCCAGTTCGTCTGCACTGGGAAGCTAGCCAAAA	[T/G]	3R	45853946		I	0	1
AGAMP3_3R_45860409	TATGGAGGACACATCATAGTAAGAAATCGATTCGCATCTAGCTCTCGTTGAAAATAGGTT[A/T]AACTCATAGCAAGTATCGTAAGTCGGTGGTACGGGTAGGATTTGTTTTACTTCAACGTAA	[T/A]	3R	45860409		IG	0	1
PX2-U-snp1	TTCATCATTTCGAAAACTTTGGCTAATCGAACAACAAACAAGAAAAGGCTGTTCACACCT[T/C]CATCGTCCTTTCTCATTCCATACTAATAAGCTATCGTTTAATCGCAACGCACCAGTCWTG	[T/C]	3R	47043807		3UTR	0	0
PX2-snp1	CTCGTATGCGACGATGTTCTGCAARCTAGCGATCACTACACGTCGTGCTCGTTGGAAAAT[T/C]TCTTCATCACTCCAATCTCGATGCTGGCGACGAACGCGCTTCGCTACCACATTGTGCCAA	[T/C]	3R	47048172		S	0	1
AGAMP3_3R_47052216	CATACGGCCCGGTATAAGAGACGTTTGAACTGTTTGAACACTGCACGTCAAAGAGACTGG[T/C]TGTGAGGCACCGAATGATGTATGGTTTGGAGTCACTCCCTGAAATGGACTTGACGTGTGA	[A/G]	3R	47052216		I	0	1
PX2-D-snp3	CTTGATGAGCCACGTCGAAAAGCAGCGCTACGATGGATGGTACAACAACCTGGCCCATCC[A/G]GACTGGGGAGCTGTCGGTAAGTTGTGCGCGCACACCACCCTTTTGGTCATAATTTTTTGA	[T/C]	3R	47053506		S	0	1
PX2-D-snp1	AAWATTACATCCCCCGTTTGCGTCCGCTGGCTCGCGATCGATTGGAATGTGTCAATTTGT[T/G]CACAATTCGCTGCATACGTTTTGAGCGATCGGCGACAGCGGCTAAAAAATCTGGGCATCT	[A/C]	3R	47053889	rs3225316	IGU	0	1
AGAMP3_3R_47589557	GAGAAGGCAAAGGCCTTTGGGTTGATGGTTGTTATGCGCATGATTGCGCATGCTGGCGAG[C/G]TGGTGGACTGTAGTTATGttttttttCTTTCTCTAGTTTACTTTCAGTTTTGTTCAATTG	[G/C]	3R	47589557		I	1	1
AGAMP3_3R_48109485	ACTACGTTTGCGGAACGACTGAAGATGTGTCCGTGTCCATTTGTACGTGCTGTTCAATGG[T/C]CATGGCGCAATCCCCTTTTCGATAATGGTATGACGACGGTTGGTGGTTCTTCTGCTGATA	[A/G]	3R	48109485		I	1	1
NADH-snp1	ATGTTGTGGGAAATTTCCAAACAGATCGAAGG[A/G]CACACCATTTGTGCGTTGGGCGATGGTGCCGCTTG	[T/C]	3R	48117923	rs3243655	S	1	0
AGAMP3_3R_48120339	TGTATGCCATTTCATGTGACGATCATAATTTGGAATATTTCCATGTGTAGCAGACGACTT[T/C]CTTTTTGTTCCTATTTGCATTCTCAATTACATACGCATGACTGTACGACACACTCACCGT	[T/C]	3R	48120339		IGU	1	1
AGAMP3_3R_48121459	TGAGGCAGCATTAGTCCGCTGCCCGTTGTATCTATCCAGATGTAAGCAATTCGGCGCGCA[T/C]TCCCACCATTAGCGTAGAGAGAGAAACAAGAGAGTTACAATTTAATCTTTTCCGCAAGGT	[T/C]	3R	48121459		IGU	1	1
NADH-D-snp1	TCTCGACCCGTCTTCAAGTTCAC[A/G]CAAACGCTCTTCTTGTTCCGATTCGCCGCCATGAAGTACACGGA	[A/G]	3R	48123530		S	1	1
NADH-D-snp2	GTCCTCGCTTCCGGTAATGTGTAGCAGCCCACCCATGGATGCGGCGATAACGTCGTAGCC[A/T]GGTTTAGCCTTGTACGGGCCCTCCGACCCGAAACCTGTAATGGAACAGTACACTAGCGAT	[T/A]	3R	48123722		S	1	1
db3262214	AAGTAGTTTAAGTCGCTTAATTTGAAAACAAAAATCGTTCAGGGAACAATTTTCCTCACC[A/G]TTGTTCTTAAATCATGATGTGATTACTATTGATGTCGGTAAATCTGTAGACCGTACAACG	[A/G]	3R	48653118	rs3262214		0	0
CYP303A1-snp2	TAGCAGCACACCGCGCCGTAGACCCCAGGTGCGCGTTTCGTAGAATATCCCGGTGGGCCG[T/C]CCGTCAAAGTCTTCGTTGTTCATCATCTCCTTCAGCGACTCGGCATTGATCGCCATGACC	[T/C]	3R	48654411		S	0	1
CYP303A1-snp1	CTCCTCAAAGTCCTTGCGTATGTGAGCCGCTTCGTTCTGAATGATTTCCGTCATGCCCTT[A/G]CGCGCAAACCCAAACTCTTTCAGATGGCGCACAATGAAACGGCGCTGCTCCTGCCAAAAC	[A/G]	3R	48654543		S	0	1
AGAMP3_3R_48654954	GCGGCATCAGAAAAACTTCAACCCAGACGACGAACCGCGCGATCTGATGGATGTGTACCT[A/G]CACACGCTGCAAAACAATAATGCACCGTCGGACAGTTTCTCCCGCGAGCAGCTGCTGGCC	[A/G]	3R	48654954		S	0	1
AGAMP3_3R_48655806	GCCTAGCGTTCGGAAATATCATGTCGCCATACGGGCCAGGCACTAATGGTTGTTGGATTG[C/G]AAAATATCGTGTCGATATTAATTTGTTCTATAAGTCTGTTTCAATCGGTTGACGCAAACA	[G/C]	3R	48655806		IGD	0	1
CYP303A1-D-snp1	GCTCATCGATTTCATCCAACGGGKTTACGTCACTTTAGYAGCTTATCGTAGTCGCTCTTC[A/G]CAATGATCTCAAYTAATACCAAGTTTAATGGCATTTTTCACTGATAATACTTTTGTGTTT	[A/G]	3R	48658835	rs3262053		0	0
CYP303A1-D-snp2	ATTRTTTGCGTTTTCTCTTTSCAGTGATTAAGAGATAAATCAACTCCTCAGAGGATATCA[T/C]CAAATGTTGCTCTTTTCTCCAAACTTTGGCTAAGCCATCCAARGGGGAAATGAAACACAA	[A/G]	3R	48658948	rs3262050	5UTR	0	1
AGAMP3_3R_49490029	ACAAGATATCTCACAGCACAATCATTTCTCTGGCTTTTGTTTTATTCATACCAAAAAACG[T/C]ATGAGCTCACTCGGCCACGAACTCGGGCTAAGGTATCATGTGTTTACTACAGTTTAAAAC	[A/G]	3R	49490029		I	1	0
AGAMP3_3R_51396790	TCCTCGTGCGCGGAGGGACGGCATTGTGTCTGTAGGACATTGTGAGAAAATATGCATTCT[T/C]GATAACCTTGACCCGAATGTGCTTTGCTTCTTGTCACCCCAGCCTCAATTATCCATGCGT	[A/G]	3R	51396790			1	0
EVEN-51-rs3241374	GACCCGTTTAGTGATTTGACGGGACTGACGCTAGCATTACTAGAGTTGGA[A/G]GTCGATGCGGAAGTGTCAAACTTAGACACGGACACGGGGCTTAAAGABAG	[T/C]	3R	51965985	rs3241374	S	1	1
GABA1-1-snp2	TTGCACTAAACGGACCGACCYGTAGTAATTTATGGATCGTGATGCAAACGCAAGCTTTCT[A/G]AATAAACTGTCACTCAAATATCAATTAAACKGAAAAGCATGCTAACTAATAAAAGTTCAA	[A/G]	3R	52001493		IGD	1	1
AGAMP3_3L_294206	CAAACGTGATCTTGCTCCACGACACCATGGGATCGTAAACAAAAGGCTTCAATACAGACA[T/G]AAATGTTGATGCATGGGTTTGAAGAATTCGTAAAACAATTTCACAGCATCGCCGATAAAG	[A/C]	3L	294206		NS	1	1
AGAMP3_3L_1913836	TTTCTTATGTTTGCTACGAAGCTGTACCGTCTAGTTTCTGAATATTTGTTGCAAACAGAC[A/G]CGATATAGCAAATGAGATCTATTGTTTGTGTAATTGTTGTGTCTGTTGGTATTTATAGTT	[A/G]	3L	1913836			0	0
AGAMP3_3L_1914429	TATGATAATCCAATGTCATTTGTTTTGTTCGTAGCACCGAGCAACAGGTAGATACTTGTT[T/C]GAATTAATATGTCGAACGATCGGCCTGCGCGAGACATGGTACTTTGGGTTGCAGTTCGAA	[A/G]	3L	1914429			0	0
SOD3AB-U-snp1	TTATAAACTTTTTTTGGCTTTCTTGTGTGAAAATAGTCAATATTTCGCCAACATATGTGG[T/C]ATGTGTTTAGTTTGTAGAGATAAACTCRAATATAGAAACAACGMGGTAAGAATTTGGAGC	[T/C]	3L	1916607	rs3462802	IGU	0	1
AGAMP3_3L_1918212	CTATTGTTATGCCGAAAAACTTCAACAGACTGCCAGTTTCTTCTAATGAGGTGACACAAT[C/G]GAAAAGTGAACGTTTTCTATTGAAATAGATTCAAATGTTCCTGCGTCGACAATAAATTGA	[C/G]	3L	1918212		IGU	0	0
Sod3ab-snp2	AAACAAATAGAGACAAGACAACGCGCAC[C/G]CTCTTGCAACAATGGTGAACTAGGTAACATGTTAGATGCGGGGAAATTAGATGTAAAACT	[G/C]	3L	1919710	rs3469639	3UTR	0	1
Sod3ab-snp1	GAGAGACAACCGCGTGAAAAATCGCCAAACTCGTGTATATGACACCCATGCTTACCCGGC[T/C]GTAAACCCTCTAATGCACCGGTTACAGCCACGGACGAACCCTGCAAGGAAGGAAAAAYAA	[T/C]	3L	1920006		NS	0	1
SOD3ABEX2END-187	GSGAAGAATACTTTGCCGAACGATTGCATCTGACCACGGACGAGTGATGAATGCTTAATA[A/T]TAACAGCAAGCCTTATCCAGTGGGAAATTTGTCCTTCTAAAGCWAAAGCTYCCAGTTCGA	[T/A]	3L	1920408	rs3469635	3UTR	0	1
SOD3ABEX2END-463	GACGTTCTTCTCCGTTTCTCTTTAAAAACTTATTTMGAACACAATTTAGCTACCATTGCT[A/G]TGGTACGGCCAGTACACGCATATGTTTAACACACATTCATATCATTATCGTGTATTAGTT	[T/C]	3L	1920684		IGD	0	1
SOD3ABEX2END-530	GGCCAGTACACGCATATGTTTAACACACATTCATATCATTATCGTGTATTAGTTTTTTTA[A/T]GCTTAAACATAGGAACCTATGACAAGTAATGCTATACCTGATCAACATCATTCTTTCCTC	[T/A]	3L	1920751	rs3469633	IGD	0	1
AGAMP3_3L_2196426	TCATTACGCAAAACACTAATGGCTGCTGTTGTCTGTTCAGTGGCTAAAGGAGATCTTCTC[A/G]TCATATATTCATTGCCTTTCTTCCCAGCCAAGATACATTGGGAGCGGTAAATAGCTTTTG	[A/G]	3L	2196426		IG	1	1
AGAMP3_3L_2477317	ACCATTCCTATTGAAGTTAGGTTTATGCAAAAATAGCTAGCAGCAAAAACAATAGCTTCT[T/C]GATCGTATTCTACCGCTTCCAGCCATGCATTTCTGATTTATGATAGTATGAGTTATGATA	[A/G]	3L	2477317		IG	0	1
AGAMP3_3L_2482569	GCTTTTAGCTTTTACAAACAATATTGCAAACCAAAATTCATAATAAATCCACTTAATTAG[A/T]GGATAGATATGATCAGTATGTTTTCTCCCAAATATTGAAAACCTTGAATTTTATTACATC	[T/A]	3L	2482569		IGD	0	1
AGAMP3_3L_2486016	AATAATCGGCTATGCCTCGATTGGGTAGGAAGAAACCAGAAAACATGTTTTGAGCCATGC[T/C]AAGCTTAGCTCTGTTTTCAGTTTTGGTCCAATTTATAGCTACAGCGTGACAATGAATGTC	[T/C]	3L	2486016		IGU	0	1
AGAMP3_3L_2489381	TTATCTATAAAACTTAGTTAATCTATAAAACTATGATTTGCTGGAGAAGTAGCTTTGAAT[T/C]ATTTGCAGAGTATTTGGGTGTATCTATCTTGTTCATACATTATGATGTTTAACATTAGTG	[T/C]	3L	2489381		IGU	0	1
AGAMP3_3L_2778354	GTCGTTCGAAAGGTGCTATTACCCAGGCGTTGAAAAAGTGCTACTATCACTGCAAACAGC[A/C]ATATCACAGGACGCAACAAGCTGGCATCCAGCAGCCGCCGCTAATCCGTCAACTTTTGCA	[A/C]	3L	2778354		NS	0	1
GST-s1-2-snp1	GATTTTTTGTTTCTTTTACACAAAAT[T/G]TTCATATCATCTCAACCGTTCTGAATCGCCATTTATTGTCATACTTATCCATTATCGAGC	[T/G]	3L	2779464	rs3462089		0	0
GST-s1-2-snp2	CACGAGTGCATAGAATTTGAAATCAGTAGGTAAATTATTCGTTGATATCAAAAACAAACG[A/G]AACACCAACGACCGATCCAACAGCATAAGAAATAGTAGTAGAAGAAAAAAAAAGAATCAT	[T/C]	3L	2779758		3UTR	0	1
GST-s1-2-snp3	CTCTTCTCGGCAAATCACACCATCCGTCTAAACTTCGGTGATGGGTCTCTTAGCGATGTA[A/C]GCTTTGACATTCTCATTATCTAGCACCTTCTGGACCACCTCCTGCAAGTTCGGGAAGTTC	[A/C]	3L	2779907		S	0	1
GSTS1EX3-118	TGCGAGACCCATCAATGCTGCCATGCGATGTGTTGTGCACATCTTTTTGCTACAAAAATC[A/G]TCCTTCCTACAAAAAAGGATTGCAAAAATATGGCCGGTAGAACCATCCAAGCAGAAGKCA	[T/C]	3L	2781888		I	0	1
AGAMP3_3L_2782684	GTACACTAAAATACTACCTACACACAAAACCAGGTTAATCACATGACGCGGAATCTGCAG[T/G]GAAGTTATTTTAACAAATCGTCATCATCACCACCGATACATAGGTGCATTGGCGGTACCA	[T/G]	3L	2782684		I	0	1
AGAMP3_3L_2783190	AACCCCTCTGTCAGCAAATGCTAACAACAACAACAGTACAGAGACAAACTAGACACGGAC[A/C]GATTGTCGAGTGACTCACTTGGCTTGAGTGCTGGCCATTCTTCGCGGGTGATCCTCACAT	[T/G]	3L	2783190		I	0	1
AGAMP3_3L_2783664	AACATGACAAAAATACATATTTTGTAAGCAGCAAATGCAGCAAATACTTAAGCACAATTG[A/G]ATCGTTATCGAACCTCATTACCAAACCAACACAATCGCTATACCTTCTTGTTCTCCATCT	[A/G]	3L	2783664		I	0	1
GSTS1EX1-89	CTGCTACAATACTGCACTGCACCTCGAACGCAACTCGAAGCGAAACAATACATTTTATTT[A/C]CACTTTTGCACCCCATTTCTTTGCWGGTCTCTGTTTTGATCGAACAATGTACTTTCGATA	[T/G]	3L	2784192		I	0	1
GSTS1EX1-311	CAAGCGTGCGTACCGCTCGCTTATTTATCCCAAAACCCGGCAACCCGGCAGTGTGGTATT[T/C]GTGCGTATTCGGGACCCATGTGTAACGCGCACACTCGTCGTTGCCATACGAACGTGTCGT	[A/G]	3L	2784414		5UTR	0	1
GSTs1-2-down_snp2	TGTATTACATTTTCTTGGTCAGCGTGCGACAATTACATCCGAACGAGTTTGCTCCCATGT[C/G]AAGCCCTTTTTGGCTATTGGTATTATGCAATGTGGTACAGAACGAACAACAGTTTAGCAC	[G/C]	3L	2785153		IGU	0	0
GSTs1-2-down_snp1	TATTATGCAATGTGGTACAGAACGAACAACAGTTTAGCACATAGGTACAATTAACCAATT[T/G]CGGGTCAGCTAAGATTTGTTTTAACTTTTGATTGTTAATAATTTT	[A/C]	3L	2785234		IGU	0	1
CYP4C28-U-snp1	ATAAAAGGCATCAAAGATATGTTTTGTGATRGCTACGATAAAGCAGCAACAAAGCATAGC[A/G]CGATGTGACGATGCATTTGCGCAATGTATGCCAATCGTTTGACTCTTTCCAATCTCAGGC	[T/C]	3L	2951992		IG	0	1
AGAMP3_3L_2952076	ATGTATGCCAATCGTTTGACTCTTTCCAATCTCAGGCAAGATGAATCGCACTTTGTAACA[T/C]TTCAGTTTGAGTAAACACCATGCTGTACACCATGTATTATTGAAACAATCGGAACCGAAC	[A/G]	3L	2952076		IG	0	1
AGAMP3_3L_2952350	CAGAAAGATGTAGTAACTTAGTATCGTAGTAAAACTCCCAAAAACAGCTGCACATTGTGT[A/G]TCGTTTTTGTTGAATTCTAAGTACTGCTGTAATCTTATGCACAGCATTTATTTTCGTTCG	[A/G]	3L	2952350		IG	0	1
db3464519	AGGACATCACATACCGAGTGGAACGAACGCCGTGATCATGCTCTACCAATTGCACCGAGA[C/T]CCACAGTACTTTCCCAATCCGGAGAAGTTTTATCCGGATCGTTTCCTGCCCGAAAA	[T/C]	3L	2957613	rs3464519	S	0	1
CYP4C28-1-snp2	GATGGCGCTCCCTATCTCCACCCATGATGCCGTCTATCTCCAGGAAGACGCGCTCCTGGA[T/C]GGTTTGGTCCGTGCCGAGCAAGTACAACATCCACGCCAGTGCAGTGGCCGTCGTATCGTG	[A/G]	3L	2957852		NS	0	0
db3464515	TGATCCAAAAGCGCCGTGAAATGTATCGACAGCGAAAGCAGTCAATGCTGTCGGAAACTG[A/G]ATCCGCTGATAATGCACCACACAGCGARGAGGCGCATGGTCAGAGAAAACAGCTTG	[T/C]	3L	2958064	rs3464515	NS	0	0
AGAMP3_3L_2970728	ACTCACGCTAATTTGCTTACCATCGCGATCAACCAACCATTGCAAACTGTTACCCAGCAA[A/T]GGTAACGCAGGAGGGCCTGGAATACGATTGATGTGTTTGGCGACCTCCGCTCGCTGACGG	[T/A]	3L	2970728		S	0	1
AGAMP3_3L_2976165	CTAAGGATTGATTAACACTGCTTAAACAAAATGAACAAACACGAATAACATGTTTTATAG[A/G]AATTGTTTATTGAAATTTGATTCAACTGGCAAATAGTATTTTACCTCGTTTTAACATTTT	[T/C]	3L	2976165		IGD	0	1
AGAMP3_3L_4109048	CGAAGAGATACGCAATAGATCCTTGTTAGGATTGATGATCATCCGCTTGGGTCTGTTAGT[A/G]GTGCATCAAATTAATTTCTTCATTTCAGTGGTTCATAATTTAACGCGCACCACATGCATC	[A/G]	3L	4109048		IG	1	1
AGAMP3_3L_5051574	GCAAATATTGGGGATCTTTCGAAGCTGCCAATTCCGGACGCTCCAGATCAGGATTCCAAT[A/G]CAAACAAGTACGCGAACGTGTGCCCGATTTGTCTACAAAAGCATATCATTCCAACCGCAG	[A/G]	3L	5051574			0	0
AGAMP3_3L_5055981	taaaaGCGAGTATCACCTAATTCCAATTTAAGAGAAACTATGACGTTTATTTAAAATACG[T/C]TTCTGGAGCGCCTTAAAGCTACTGTTAATTGTCTGTTTTCACCCAAATCTGCATAGATCT	[A/G]	3L	5055981		IGD	0	1
AGAMP3_3L_5059617	TCTCCGGAAGGGGTTGAAGATTCGGATAAAGATACTACAATCATTCATACAGAGGAATAT[A/T]TGTCCGATATGGGAGACGGAAATTTTGTGTCCGCGTTGGAAATGGCACCCAGCGTCGAAC	[T/A]	3L	5059617		NS	0	1
AGAMP3_3L_5255458	GCTTATGGATGCACTGTTTCCGTTAGTTCTATTTCTCGGCGATCGGTATATCCATGTCTG[T/G]CCGAGCATACGTCGCCACGAGTTCCGCCGAGATAAACACTTCTTCCAAGAGGGCGGAGAA	[A/C]	3L	5255458		I	1	1
AGAMP3_3L_5259533	tttCGATGGGTAATTTTATTTCTTTTACCGTTCGTTTGGTGTGCATTTCTGTGCCATACC[A/T]TTCCGGGCGTGTAAAAGTGAAGAATAATGCGAAGGAGTGGTCGTAATCAAACTGCAGGGA	[A/T]	3L	5259533		I	1	1
AGAMP3_3L_5261398	CCGTGGAACGTACCATTCTCCTGTGTGCACCACTTGCATCGAAGTAAATGCTTCTGGAAC[A/T]TGGCGTTCTTTTTGTTTCTCTTCATGTTTCAGAGATAAGACCAAAAACTTGAGTTTTGCA	[A/T]	3L	5261398		I	1	1
AGAMP3_3L_5266881	TCTGCATTCAAATGATGATGCAAACGAAACGAAGCTGTTTAAGTCCCTGCGCAAGGTGAC[A/C]GAATATTCAAACAGAGGTCGTTGACTGGTAGGTTTTCTTTGCACATTGAAAGCCTCTTTT	[A/C]	3L	5266881		I	1	1
AGAMP3_3L_5267800	AACGGTCAATGCTGGATGGAGTGTATTGaaaaaaaaTCTGTATTTTGTGGGTTTTATGGT[A/C]AAACCAAAAAAAGCAAGTTCAAACCCATGAATCTGTTCTATGAGTGTCAACTGTAACACA	[T/G]	3L	5267800		I	1	1
AGAMP3_3L_5278422	CCTATGTAAATCGATGAGTTGACATAGTTACGAACACGCTTAAACAGGGAATGGCACAAC[A/G]GCTCAATGAAAGCTGCTGCATGACCTTCTTCGTCATCGGAAGTGACAGTTATGTAGCGAT	[T/C]	3L	5278422		I	1	1
AGAMP3_3L_5283499	ACGATCGCAAATGCTACTCAATATCATCTTCGATCTCAAGACAGAAGCTTGTTTCTGTAT[T/C]GAGATATTTTGTAACTTCTAGCGCAAACAGTAAAGACTCCCTGGTTTTTTCTAAGGGTGG	[T/C]	3L	5283499		IGD	1	1
SOD1-U-snp1	CCCTGCTACCATGTGCGTCGTCTTTGTGAATCTTTGTGTATTTATCGCTTTGGAATAAAA[T/C]AGCAARTAGTCCGCGTGCTAGTTGTCCTTGTCGCTCCTTAGCGTTAG	[T/C]	3L	5576966		I	0	1
AGAMP3_3L_5577341	TAGATGttttttttACAGAACTTTTTCCCTCGTTGCATAGCTAAGCTTCTTTATGGACAA[C/G]CTTTTTTTCCAAACAGGATCGAGAATCTTTCATTTTGTTGCTGTGTGCAATTTTCCAACC	[G/C]	3L	5577341		I	0	1
SOD1-snp2	GCCGTTGCTGTGCAGGGCTCCGGTTGGGCATGGTTGGGTTACAACAAAAAGACGAAGCTG[T/C]TGCAGATTGCTGCCTGCCCGAATCAGGATCCTTTGGAAGCAACCACTGGTGAGCAGTCTT	[A/G]	3L	5582155	rs3582365	S	0	1
SOD1-snp1	ACCATTCCATTTTCTGGAAGAATCTATCGCCCGACCGCAGCGATCCGTCGGCGGAACTAC[A/T]GAAAGCGCTGAACCGTGACTTCCAAAATATGGAGAATTTCAAGAAGGAAATGAAAGCAGC	[T/A]	3L	5582277	rs5408893	NS	0	1
SOD1-D-snp1	AGACGCAGAGTGAAGAAATTGTTGTTTTCGTTTAACCAAAATTTGACAATACGCACAGCA[T/C]TGACAGAAAGTTCTCGCGAATTGGCACTGTGGTAACGACATGTGACATCTGAACACGATT	[A/G]	3L	5587148	rs3582453	IGU	0	1
AGAMP3_3L_6004918	TTCGTGTTTGTACATTTCATGAGCGAAATAAGCTTACGAATTTAACATTCAGCACCAAAG[T/C]GTCATCATGGCGAGCGTTATTGGGAGGAACATGCTTAATCACGCTAAGGCGCACAGTACA	[A/G]	3L	6004918		IG	1	1
S7-57-rs3574818	ATTCGAACGTAACGTCACGGCCAGTCAGCTTCTTGTACACCGACGC[A/G]AAAGTGTCAACCTGCAAGAAAAATAACAAACACACAACATTAATACACAA	[A/G]	3L	6566450	rs3574818	S	1	1
AGAMP3_3L_7904530	TTAAAGAGCGCCTCCACCACTCAGGTGCACTCCCGAGCACGTGGTCTCGCTGCATCTTTG[T/C]TTTTCTGTTTGTTTTGCCTTCCCCTAGGCTCCATGGCAACGCGTCCCTTGTCGCCCTGTG	[T/C]	3L	7904530		IG	1	1
GSG8-snp1	AGCTAGTAGGGAGTGAGAGATAGAAGACGTTGCGGTGCTTACTTT[A/C]TGTACAGTCTGTACACTAGGAATGCATACGCCACCTGCTTAAGACAGTCGCTGTACACCA	[A/C]	3L	7954220	rs5036467	I	1	1
GSG8-snp2	GGTGTGACCGGACAGGGAAGGTTTCGTCGTATTGCCAGCACTCGACACTCCCGGCAGGTC[T/G]STTGTTGTTGCTCGCTTTGCACCATACCGTAGGATGCGATAAAGTTGCGTACCGTTCGAT	[T/G]	3L	7954355		3UTR	1	0
GSG8-snp3	GACAGGCCGGTTGCYGCAAGCYAGCCACCTTTCGACCCAAGCGCTCCTGTACGGTCCGGT[T/G]CGGTGCAATGTCACCATAAATCATCACAATTTGGTGCTTTCGATGGGACYGGACACACTC	[T/G]	3L	7954539		NS	1	1
AGAMP3_3L_7956830	ATGCGAACATGCCATGTAAACTAGTAACATACACGATTGATTTAAGTTTGAAGATCTTTT[T/G]AAACGAAATGTCATAAACCACGGTAATCAAGTATAGCTCATTTTAAGTTAGTCAGGTCCA	[A/C]	3L	7956830		I	1	1
PX9-U-snp2	TACGGTAATAGCGATACAAAACAGCTCTATCAAAACTCCATCGCCTGTTTTTTTTTATTG[T/C]TGCTGTAGTAGGAGGTGTGCRCAGGCTAATAAAAACACMCCATCACACCATGMTAATCAA	[T/C]	3L	9066148		I	0	0
AGAMP3_3L_9067522	GTtgatgctgatgatgatgatgatgatgatgGGGGCAGCAAAACTCCCACCAACAAACGT[A/G]GGGTGACACACTGCATCACGCCAGACCCGCTCACAAAAGGATTAAATTCAATCTCTTCCC	[T/C]	3L	9067522		I	0	1
AGAMP3_3L_9068873	ATTCTTTTTCTCCTCTCTACAGATGATGCTGTTTGTAGTAGCATCAGCGTTGATCGCCCT[T/C]GCCCAGGTCGATGCAGTGAATGTGGCCACCTCGTACAGCGTGGTCCATCACGATCAACCG	[A/G]	3L	9068873		S	0	1
PX9-snp1	CTGGAGTAAGTGACCGGTCGCAAAGGTGTTTGTTTGGGAGAGCCCATTACTAATCAAGAT[A/C]TCTGCTTTTCTTTTCCTCCTCTTCTTACACAGTTTGGTTTCGGAGATCCGCAAGCCGACT	[T/G]	3L	9070368	rs5413342	I	0	1
AGAMP3_3L_9071290	CATAGTACGTGTGTAGACATTTTGCACACGCAACGTGTATAACGTTTGTTTAGATTGTGT[T/G]TTTCCCGCATCCTTCCTTCCcacacacacacacacacTCTTTGTTATTATTATTTTGGCC	[A/C]	3L	9071290		I	0	1
AGAMP3_3L_9090151	CATGCTGGCCTTCCGGATGTCGTTCAGCTGTGGTGGCGTGAACGAGCTTGGTCTGTTACC[A/G]TTCTCAAAAAAGAACCGATCTCCCTTACGCGTACGCAGGAACTGCTCCATCAGAATACAG	[A/G]	3L	9090151			0	0
PX5B-snp3	CCGATGGGACGGAACGATTTGAGYTTTGATCCCGAAATCAAACACTTCCTCTTCCGGATG[A/C]GCGGTCGCTTCGGTACCGATCTGAAGGCGCTGGACATACAGCGCAGTCGCGATCACGGAA	[T/G]	3L	9090540	rs3476499		0	0
PX5B-snp1	TGAGAAAGTGTTCCAGGAGGCACGACGCATCAACATTGCACAGTATCAGCACATCGTGTA[T/C]TACGAATGGTTGCCGTATTTCCTTGGGATAGATCCAATGACCCAGCGCGGTTTATTGGTG	[A/G]	3L	9090963	rs3476495		0	0
AGAMP3_3L_9092513	TAAAGTATTACAAGTATCAATTAGTATTACCAACAGTATTAATCACCATGTTTGCCAATC[A/C]TGTTGGGTGATCTGTTTGAACAGTTGGCACTGTTATCGTGTCTGCTTTGGTATAACTTAT	[T/G]	3L	9092513		I	0	1
PX5A-U-snp1	CCGTTGGAGTATAGATGTACAGTCGCTGGARWAGAGATGGACAGTCGATGTTCCCCGTTA[A/G]GTGACCTCCAACAAACATTTGCTGCCCTATACGACGCCTGTCACTGAGTTTTTTCAACCC	[T/C]	3L	9097882		I	0	1
AGAMP3_3L_9810941	GCCGGTTGGTTTGAATCTGTTCGCCGGTAAGGAACAAGAGCTGGTGCAGCACTGCAAGGA[T/C]CGCTATCTAAAGGTAGGTTGAAGTGTGTCTCGACTAAATGGCAACAGTTTCTTAACCGTT	[T/C]	3L	9810941		S	1	1
AGAMP3_3L_10781850	AAAACAGGGGAATCATCAGTTCCGCTAAGCTCAGTGCGTTGTCTTTTGCCTACCTTTCGC[A/G]TCCTTACCTTTGCTCTTCGAACACTTCGTACGTCGGTTCGGGGCGGTAGTGGTGCGTGTC	[A/G]	3L	10781850		IGU	0	0
PX4A-snp1	CCGTTGCGTGTCTCCGCCTGCAGTTGTCC[T/C]CGGCTGAAGGTACGCAAGCTGTTGGTCTGCTCCAGCGAGTTCCC	[T/C]	3L	10786796		NS	0	1
AGAMP3_3L_10792992	GGTCACTGGTCGTCGTAGCGAAGGAAGATTCGGGTATTGCTCTTATACTTTATTCGCGGA[T/G]ATGATACTTTCTTTTTATCTGTCACGGTCGCCATGTAGTGTTCAGTTCAAGAGTTAGCTA	[T/G]	3L	10792992		I	0	1
PX4B-snp1	ACACTTTCTCTTCCGGAACGCGAACCCTTACGGTGCCGATCTGAAGGCGATCGATATACA[T/C]CGGGCCCGGGACCATGGACTTGCCCGCTAYAACGACTTCCGGGAGCTGTGYGGRCTGGGG	[A/G]	3L	10797065		S	0	1
PX4B-snp4	CCTGCTCGAGCAGTTCCGGCGTACGCGGACGGGCGATAGGTTCTTCTTTGAAAATGGYGT[T/C]GGCGCTGGGTTTGACGCTAGYCAGCTGGRTGAGYTGCGGAAAGCGACCATCGCAMGGTTG	[A/G]	3L	10797350	rs5225774	S	0	1
AGAMP3_3L_10802481	AATCCCCGTCAGAAGGGGATCGTCGCATCGAGGACAACCACTCGCCGAATACATTATCGG[A/G]CAGCGTAAGTACGAtgtgtgtgtgtgtgtgtgtgtgCATTTCCACACTGGCGGGAATAAT	[A/G]	3L	10802481		IGD	0	1
AGAMP3_3L_11203272	AAACTGATTGCTCAGATAGGTCATTCCTTTTTGAATCACCTCTGCGTGCTTTGCTTTGGC[A/G]ATGTCATTCTCCAGCAATGCCATCAACACATATGATGTGAGGGCCACACCATTGCGCAAC	[A/G]	3L	11203272		S	1	1
AGAMP3_3L_11203647	ATTCGTAGCTTTGTCGATTAGATGCTGTTCTTTCGACCCGATGGCATGCAAATAATCCAG[T/C]ACCAAAATGTTGGGAACAAATTTGACCATATTCTGCTCACCACATCCCGTCGGAACGCCG	[T/C]	3L	11203647		S	1	1
AGAMP3_3L_11206511	TTCCAGCCGTCAGATCCTCAGGCATCTGCAAAGGATCGAATGTTTTAGTTGTAAGCCTTA[A/G]AAACTAATATCGCTCACTCTTCATACATTGAAGTTGATCATTCGGTTCATATTACGTCGC	[A/G]	3L	11206511		I	1	1
AGAMP3_3L_11207723	GTTTTTGATTCGGTTAACTATTTGGCAAGGATTAATATACATGAAATGGACCACGCAATT[A/G]ATCAATGCAGAACAGATACGTACATGATGTACAAGGTTAGCAAATAGAATGCAGCAAATG	[A/G]	3L	11207723		IGU	1	0
AGAMP3_3L_11712839	GAGCTAAAACGGAAGCTACGTCGGCTTCCCGTCGAGGCAGCACCGTTGTTCGACTATCTG[A/C]TCGATCGTACAAACGATTTACATGGTACCGATTTCTTGGGTTGTAATTTACTCCACGAGG	[T/G]	3L	11712839			1	0
FBN-205	CACCGCAGAAGCATCAGTGGAATCAAACGATCACGGAGCAGAAAGGCAAC[T/C]ATCACGAATGTTATATGCCACAGGTGATTCACGTGTCGCGGGAA	[T/C]	3L	12279573			1	0
PX7-Ui-snp1	AAAAAAAAAAGRAAGCACGAKAATGTAGTTSAGGGAAAAAGAGACCCGTGTCCTTGCGAT[A/G]MACTTTACATTCCGTTCTCGATCTTGCACGTTTCSCAGCGTGCCTTACTACGCCGGATTG	[A/G]	3L	12779319		IGD	0	1
PX7-snp1	CAGTCTCGATCCTGCCACCAAGCATTTCCTCTTCCGCTTCAACAACATGTTCGGAACGGA[T/C]CTTAAATCGCTCGACATCCAGCGTGCTCGCGATCATGGCCTRCCCGGATACAATGATTTT	[A/G]	3L	12784385			0	0
PX7-8-INTER-snp1	ATTTGTAACAGGCAATAAAATTAACGGATAGCTTTAAGTAAACCGACGACTGTACCACCA[C/G]ACCGGCCAACCGGTGATGATCACCGACTGAGAATGTCGTGACCGAGCGAGTGATCAAGAG	[G/C]	3L	12786525			0	0
PX8-snp1	CCTAGGTGTGAAAAGGTTGCCGTTTTCGTAGAAAAAGCGATCGCCCTTTCTAGTGCGCAG[A/G]AATTGCTCGCTCATAATACAGCGCATCACTTTGCCAGTCTGGGTACCGTCGATCTTCTTC	[A/G]	3L	12787223		I	0	1
PX8-snp2	AACACAAAATCATTGTATCCGGGYAGGCCATGATCGCGAGCACGCTGGATGTCGAGCGAT[A/T]TAAGATCCGTTCCGAACATGTTATTGAAGCGGAAGAGGAAATGCTTGGTGGCAGGATCGA	[T/A]	3L	12787531		NS	0	1
PX8-6-snp1	GTATGCCGTTGAACTCTTTTTGTTARAGTCTAACCCCTCGCCATCATTCTAATGAGAAAA[T/G]CCTATCGTATGATAATTGTAAAAATATGGTGTTTCAATCAGCGAAAATTTCTTCGCCATA	[T/G]	3L	12789632		I	0	0
PX8-D-snp1	CATGCTAGACAGTATCAATAAMAAAGAGACAAATGATTYCTTTCGTTCCAGTTAGTGTAA[C/G]TATATGGAGATGATGAACAAGTTCTGCTACTTCCTCATAGATGGCRCTATTTMCAATATT	[C/G]	3L	12793429		IGU	0	1
PX8-D-snp2	ATATTGGMGTTATTTGTCTACAAATGATTCTTATTGCAATGTTATTGGATTTTAATTTCT[C/G]TAGGTTTCTGTATTGAGTTTCGTATTTTKATATTGATCGTACTTTTGYTTATCGACCTTA	[G/C]	3L	12793545		IGU	0	1
AGAMP3_3L_12896237	GGTATCACTCCAAACCCAGGCCGTCGCTCGCCCGTCACGGGTTGCGGCCATGTACGGCGG[C/G]TGGTGGTGGTAATGTAGCTGTTATTTAATGCGCCGCACCTCGATCCGGTACAGAATCAGC	[G/C]	3L	12896237		IG	0	1
AGAMP3_3L_12897703	ATTGAACACACCGGCCACGCACAGCGTCGCCATCAGCACGCACCGGTTGAGCGAGTGGGA[T/C]GGGAGGGACATTTTCAGCTTGTAGAACCGCACCTTCTCCACCGTCCGCTGCGCCTTGCGG	[T/C]	3L	12897703			0	0
AGAMP3_3L_12902521	CTTATCAGTGGAGGCGGTGAATTCGTTGAAATAGTTTTGCCGTTCCTCGTACGCTTCGTT[A/T]ATTTTTAGATACGGACCGTTaaaatctgaagaaatgaaaaaagatgtatcaagataaatg	[T/A]	3L	12902521		S	0	1
COE09895-U-snp1	CAACAATTCGTTCCACGCGGAAGATCTGTTCTATCTGTTCCCGCTCGGGCAGCGTCTCAA[T/C]CCSCGCGATACBGAGATCGCAAAGGCGATGGTCGATCTGTGGACGTCGTTTGCAGTCAGT	[T/C]	3L	12902732	rs5407297		0	0
AGAMP3_3L_12902967	GTCACGTCCTGCAAGACCGGCGCTTTGATGGCAAGATTTCCGCAGATCTGTGTTTGGAGG[A/C]GTGTGTTTAGTTTAGAGTTTAGATATATTTCTGCGAAAGCTCTACTCTTTGTACACTTAC	[A/C]	3L	12902967			0	0
AGAMP3_3L_12903385	CATGAATGGTGAAGCTTCGCCGATGACGATGCACGCGCCGGAAACGTCCGGATAGCCGGT[A/T]ATGTTGAACTGTGTGTTCTGTGGAGCGTGATGAAGATGAGGATGGTTATTCCTTTCTAAA	[T/A]	3L	12903385		S	0	1
COE09895-D-snp2	CTCACCGCTGTTCACCATGCTTGTTTTTC[T/C]CTTTCGTGTCTGATCTTTCAGCATAATTATGGTTCGCCTGTCGTCGTTCGCGACAGTACG	[T/C]	3L	12908105		I	0	1
COE09895-D-snp1	CGCAGGATTGCTTAGGGAAAGATGAAAATTCATTCCGGCAATTGAGTTATGTCGACCCTC[T/C]GTCATTTGTGCACCTTAGCTGCGTGTATCATTCTTTATCTCTTTTTGGTACCGGACTTGT	[A/G]	3L	12908308	rs5498132	I	0	1
COE9941-UP-snp1	TTCCTTTGTTGCACGTGTTCTTTGACTGACTSAGATAACGGTACGCTACGTTACGCTACG[A/G]CGGACCCCCCAAAGACGAGATACGCTCGGTGAGCTTTGAGCTTTCATTCATGACCACCGA	[T/C]	3L	12918851			0	0
AGAMP3_3L_12922538	ACGGCAGTTAAGGACAGTACAGTACGGTACAGTGGAACCCTCGTGTCAATTTGTTATCTC[A/G]TGAAAATGTGCTCTTTTTCATTTTGTATCGAAAGAATATTTCGGTCAGTCGATAAGTCGA	[A/G]	3L	12922538		I	0	1
COE09941-snp2	GTCCCGAAGTYTTCCAGGGGTGTGCCGGCGTGGCCTAAATTTAATGGTGAGTGGCACATA[T/G]CATATTTATCGTTTGTTTGTATTTAACAGGTGAAGTTTTTTTTTGTATATCCGTAGGTCC	[T/G]	3L	12929223		IGD	0	1
COE09941-snp1	CAACACTTCGCACTATCCGTTCCTGGGTGGGGCACATCATTCGGATGATAATATTTACCT[T/G]TTCCCTTACCCTGAGCACGTCACCCGGCTCAATACAGCCGATACGCTGATGTCAGAAATT	[A/C]	3L	12929380	rs5718091	IGD	0	1
AGAMP3_3L_12931004	AACAGCGGCCGCTCCAGCTGACTGTCCGAACACGGTAACACGCCGCGCATCTCCACCAAA[A/G]TCACCGATGTGGTCTTGTACCCATTTTAGGGCGAGCACTACATCGAGCATGCCCGCATTG	[A/G]	3L	12931004			0	0
AGAMP3_3L_12932008	CTTCGAGTCACGATAGCTGGAAGATAAGAGCAGATCAATCAATTTGATGGTAAACGATTG[T/C]AGATTGCCATTTTGATCGAATTCAATTTGTCATTGCACGTAATTTAACCTTGAATTCCCA	[A/G]	3L	12932008			0	0
COE09916-U-snp1	TGYCTCCGCGTACGGTATGATGGRCACGCTGCTGGGTCAACGGTTTGTACCGTTTTTGTT[T/G]GCAAGAAGTCTATCGGGGTTGTGTATTTTTGCCTTTTTT	[A/C]	3L	12933184			0	0
COE09916-U-snp2	GTTCCAATKTCTTAYTGGAATTAATATTTATTAGAAGGGCTATTCATATTGGAAACGTTC[A/T]TTGAGAATCAYTATTTTGAAATAAATGAAAAATAAGTMAACGAAAAACAATTTGTATTTA	[T/A]	3L	12933539			0	0
PX5B-U-snp3	GTGGAACAACCCGTCCGGCACCTGCGGRCTGTACAGCAGGGCGGAAATGGCGGCCGCACC[A/G]GCCGACTGCCCGAACAGCGTCACATTGGCCGGATCGCCCCCGAACCGCCCGATATGCTCT	[T/C]	3L	12934734			0	0
PX5B-U-snp2	GCAYACTTTGSAGCGGTTCCCTGTCCCACACCCACGGCGCACTCGAGCCGGCCGACTGCA[A/G]TATCACCTTGTGGAACAACCCGTCCGGCACCTGCGGRCTGTACAGCAGGGCGGAAATGGC	[A/G]	3L	12934804		S	0	1
PX5B-U-snp1	CGCCGGTCACGAGCCGATTGCCACCGACACGATCTAATCCGCTCTCCAGCGTCGTCTTTA[T/C]CTTGTACTCGTTGAACACTTGCAGCAGCTTCCAAACGTCTACGTTCTGATAAAACGTGTC	[T/C]	3L	12934978			0	0
COE09916-D-snp1	TTTTTGTTGTCCCCGTACGGACAAAAACACTGATTGCGGTTCACG[A/G]CACRACCAAGMAKGAGCGGGATAATTGTGGGCCGACCGACCGGATCTATTTGGTGTCAAA	[A/G]	3L	12937986			0	0
AGAMP3_3L_13611534	CCGCGTCATGGAAAAATAGTAAGAAAACAAAAGTAAACAAAACCATCAGGCAAAATAACG[A/T]GAATGTAGAAGTATTAAGAGGATGGCAAAGTACAGAATGATTGTGTTCTGAAGCCGTCTA	[T/A]	3L	13611534		IG	1	0
AGAMP3_3L_13834022	TTTGGAACCAAACGGTAAAGGACAATTGACTTTAAAAAAGGTGTTTGTCATCATTCTTCA[A/T]TATACATTCATAAATCGCTCTTAAAGGGATATTCGTTTAAGGATGGATTTATTCCAGTTA	[T/A]	3L	13834022		I	0	1
db3507945	GTAAATTGTATCTATGCGCTCTGAGCGACAAGCGACCACTATCCAACTCAGTTTGACAGC[G/T]GACCGGCGTGTCGTTGTTTTGTTTACRTTTTGTTTTCCACTGCCACCATGCAGTCC	[A/C]	3L	13837072	rs3507945	I	0	0
CYP6-27740-snp1	CAACTTGCTGATGATTAAAAATCCACCYTGGAAGCAGCTCCGGTCTTACCTAACGCCGTC[A/G]CTTAGCCTGAGCAAAATCAAACAGATGTACCCGCTGCTCGATCAGGTAAGCTCATTAGCA	[A/G]	3L	13843821		I	0	1
CYP6-27740-snp2	CGTTAGGTAAGACCGGAGCTGCTTCCARGGTGGATTTTTAATCATCAGCAAGTTGTAGTA[T/C]CCGATCGGATCGCCATGTTGATCGGTGGACATGGAGCTGCAAATACGCCGCGAGAGATAA	[A/G]	3L	13843887		I	0	1
AGAMP3_3L_13847153	GAATGCCAATGATGTTGAGGTAGAAAATGATTTTCTACTGACTTCCTCCTCTGCCTCCTC[T/C]TCTTCCTCTATCCACCGATCGGTGTGTCTTCGGTACGGGAAGATCGCACACGATCACACA	[A/G]	3L	13847153			0	0
AGAMP3_3L_13957669	CAGCAAAGAACTGTAACGTACGACGGCATACTTGTTACCTCTTCAGCTGTTCTACTGTAA[T/C]TCAGCTCCTCTTCTTTTTGCCTTAGCCGTTTTTTAAAGGGGGAGTCTCTAAACGGCATAA	[A/G]	3L	13957669			0	0
db5215861	GGGCACGATCTAACAGTGTGACAGTGTCCATTTTTTTGGTGTAGTTAAAGTATAAAAAAG[C/T]CCTTCCTCGCTATCTCCCATGCCGAACACAAATTSGACTACCTCGCTGTGTAGAAT	[A/G]	3L	14599420	rs5215861	IGD	0	0
AGAMP3_3L_14599753	GTGTCCAGGCGTTTTTGCAAAATTTATATCGTTTAGCAGCGTAAATAAATCATGTCATTT[T/C]GCTGGTTGttttttttGATAAATTTCGATTCGAAGTTGGGGAATTTGTTTTCTTTTTTTG	[A/G]	3L	14599753		IGU	0	1
AGAMP3_3L_14607298	GATGAAACACATAATCATAATTGATTTATATCAATGTCAACTCATCCACATTGTTCAAGC[T/C]CGTTTTGTATAGTGATACAATGGTTTGGAATTGCACTCCGGCTCTCCCGTTCGATGCAAT	[T/C]	3L	14607298		IGUD	0	0
AGAMP3_3L_15520458	CATTATAACTAACTGTACCAAAGCGGCAAAAATGTTTGAAAATGTTCCATGTACTAAGCA[A/T]CTTTCTCTTAGTTTGTTCTGAAAAGCGCCATAAATATCTCTGGCGGCAGGTTTCGGTACT	[T/A]	3L	15520458		IG	1	1
AGAMP3_3L_15771823	GTCTCGAAAAATGCTCGTATCAAACCGTATATCCCCCCGTTCCTGTCCATCCAATCGCTT[T/C]CACTGAACAGAGAACTCACGACCAGCCATCAGCGGCAGCTGAAGGACCTGCAGGAAGAGC	[T/C]	3L	15771823		IG	0	1
AGAMP3_3L_15785880	ATTGGAATACTTTTTTATGCGAAAATGCGTAATTTGTGCAATAATTTGGAATGATTTCAA[A/G]TTAAAACAACCCCAATGTTTTCCCTCGTTTGAATGGTTTGTGTATATACACCTTGGTCTA	[T/C]	3L	15785880			0	0
TPX2-2	CTCGTGGAACTCGTCCGCCCKGTCGGAGAAGGCGACGATCTCCGTCGGGCAGACGAAGGT[A/G]AAGTCGAGCGGGTAGAAGAACAGCACCACGTACTTGCCGAGGTAGTCCGACAGGCGGATT	[A/G]	3L	15789213			0	0
AGAMP3_3L_15789300	CGCCTTCTCCGACCGGGCGGACGAGTTCCACGAGAAGAAGTGCCAGGTGATCGCCTGCTC[T/G]ACGGACAGCCACTTCACCCATCTGGCGTGGATCAACACGCCCCGCAAGCAGGGTGGGCTG	[A/C]	3L	15789300		S	0	1
TPX2-1	CACGCCGTAGTCGCGCGCGATCTTCATCGACTTGTCCGCCAGCAGCGGGATCTTCAGCTC[A/G]CCCAGCCCACCCTGCTTGCGGGGCGTGTTGATCCACGCCAGATGGGYGAAGTGGCTGTCC	[T/C]	3L	15789363		S	0	1
AGAMP3_3L_16997676	AATGGGCTTTTTTGGTTGGTCCTGAAGCGCACCGCCGATCGATGCATTTTTAAACCTACA[T/C]CTAAAATAGGATTTCAGGAATGAAGGCAGAAACGCCCCGCATTTGCATTTAGAACCAGCG	[T/C]	3L	16997676			0	0
GRX1-U-DB-snp1	AGCAAATCATAAGTTTAATATGCGACTAACTAAAACAACGACTAGAGGCATTCCATTTAG[A/G]CGAGCAGAGTGGTTCGAAGGGCTACGGAGAGGGGTTTGTTTGCAAGGACATTACTCACCC	[T/C]	3L	16998431		I	0	1
GRX1-U-DB-snp2	TTGCGGTTTTTTTATGCTTCCTATTTTGGCACAAGGTTWCACTCCGTGTGTGGTCGTATG[A/G]GTCTCGCGTTATAGACTTAAACAAAAGCAAGCTCTCCCGGTCMCCATGCCATTYGAAACC	[A/G]	3L	16998880			0	0
AGAMP3_3L_17423757	AAAAGGAAGACTCCACCCCAACGCCCCTGAAAGCTGCGATCGTGAATGATCGTGCGGAGA[A/C]GAAGCAAGAGAACGAAGACAGCCCATCGGCGGCACCGGTGGTCGCGTCGAAGAAAATTGA	[A/C]	3L	17423757		NS	1	1
AGAMP3_3L_19330966	CCCGTAGCGTTGAACCGAGCGCATTGTTTTGGGCTTTTGGGAATGGGAAAGGGACGGACG[C/G]GGGCGGAAAAGGTATAAATCCTGTTAGTCCtcggaaaaaagggaaataaaggagggagcg	[C/G]	3L	19330966		IG	1	0
PX3-DB-U-snp2	CAGCGGCTCAAGGCGGAAACCCT[C/G]TCACCGCAATGGTCCATCGAGAGCCAGGTGTCGTCGAGCGACCGATCGACGCTCGAG	[G/C]	3L	19441782		IG	0	1
PX3-U-snp1	GCTAGCTGCCTGCTGCCCGTACGCCGATGGCTGCGCCGGTCCATAGTTAGCGGGCGGGTA[C/G]GSGTTCGGMGGCATCGTCGGTTGCTGGTAGGCATTRCTGTTGCCCTGCGGCATCACATTT	[C/G]	3L	19442145			0	0
AGAMP3_3L_19447649	CACGACGTGGGAAGCGTTCAACGCCACGTTAAGACAACCGTGCATCAAAACCGTTCAACA[T/C]CTCAGCACGCTGTACCCAACGATTGATGATCTTGACCTGATCGTTGGTGCTGCCTTTGAA	[A/G]	3L	19447649		S	0	1
AGAMP3_3L_19447712	CAGCACGCTGTACCCAACGATTGATGATCTTGACCTGATCGTTGGTGCTGCCTTTGAAGA[A/G]CCTGTGGCCGGAGCTTTAGTTGGCCCAACGCTTTACGCCATCATGGAGCAACAGTTCTTG	[T/C]	3L	19447712		S	0	0
def1-79	GGCTACCYTGCTGAACGGCAGCGTCCAGGCAGCCCCGCAGGAAGAAGCGGCTTTGAGCGG[T/C]GGTGCCAATCTCAATACCCTTYGTAAGTATCATAAAAYGCTTTGATCCTTCCGTTCGCAT	[T/C]	3L	20627932	rs5508889	S	1	1
AGAMP3_3L_20689983	CTTACGCCATTGCACCAGACGCGACTGCACTCGTCGACGATTACAAAGAGAAAGAGAGAG[A/G]TCGTGAAACACAGAACAATATTCTGCGGAAATCGAAATGACGTTTCAACAACTGTCAAAT	[T/C]	3L	20689983		IGU	0	0
db5610559	GACGAGATGGACGAGGATGGAAACGGCCAACGGGGTGGCGACCGTTTCGGTCGGTGGAAT[C/T]GCTTTAAACAGCGCTAGGAACTTGGCCGTGAGCGACCCKGTCGCTAGCAGCATTAG	[T/C]	3L	20692583	rs5610559	S	0	1
AGAMP3_3L_20696355	aagggtgccataaagcccaattcctattacattaagttcaCTTCCCATAAGAAAGAATCA[A/G]TAAAGTCTGGAAAGCCCACACCTATGAGAAACTCTGGAAAACCCTGTCTACACTATCGTT	[T/C]	3L	20696355			0	0
B5REDEX1-290	CGGCGTGTACGCACGAATCACCAGCTCGTCGTTGATGGTGGCGGACAGATGAATGTGCTG[A/C]CCGATCGGCAGTCCCAGGATGTGCTTTTCGCTCGGCAGCCCAAACCGGAACCGGCGCGTA	[A/C]	3L	20700052	OK!- close hit pre SNP position only		0	0
AGAMP3_3L_20703306	AACAGGGCGAATGAAATTAATACACAAACAAATAAATGCCCAACCCAAACTGTCAAAGCG[T/C]CAACCGTAGCCAAatcagagtgaccagaaataccgatttatctgtattcctaccgatttt	[T/C]	3L	20703306		IGD	0	1
AGAMP3_3L_20704149	AAACCAACGTCGACTGTAATGTCGATCACATGTGAGCGGGTCGACATTTGAAAAAAACTG[T/C]TATTTAGCAGAGGTCGGCAAACAAGAAATAGTATAAAAAGGCTCGTATAGCTGTGTAGCG	[A/G]	3L	20704149		IGD	0	0
AGAMP3_3L_21233248	AAAGAGAGCGCAAATGATGCCCTTTTAGCGCGGTTTGGATTTGtttttttttCTGCCACG[A/G]ACGCAAGCGAGTTCTTTTCGGTGAGATATTTTAAGTAAATTTTAATTAACCTCCCGTGAC	[T/C]	3L	21233248			1	0
GABA-A-6-snp2	ACTGCTGTTCCTGGCCATCAATGTGTTCTACTGGTATCTGTATCTGTCGCGGAGCGAGCG[A/G]CTACCCCAGCAACCGAAGGTCGGATAGGAAGGGCCCCGCAGGAAGCTTTGATTGATGACG	[T/C]	3L	21612810			1	0
AGAMP3_3L_21990822	tgaaaatatgaaaaaagtgaatgaaaataaatgaGCTATTTTATGGAAATGGCCCAATAT[A/G]CATTCGTTTGCTTTGCGGCTTCCTTGTAAAACAACATTGAAGCTGCAATGGAAACGACGA	[T/C]	3L	21990822		I	0	1
COEB21998-U-snp2	CACCATGGCCGAAAATCAGGACACAATCAAAGAGAAGMAAGACAGCGGTCCCGTCGACGG[T/C]GGGCCGCAGCTGGATCTGACCAAATCGTCCAAACAGATTTACTTCGAGCTGCTGCGAACA	[T/C]	3L	22017521		S	0	1
COEB21998-snp4	GTGGTGCTGGTGGTGCCACAGTATCGKCTCGGTGCGCTTGGGTTTCTGTGCTCCAACACG[A/C]RGCAAATCCCGGGCAATGCGGGCGTGATGGATGTGGTGCTAGCGTTCGAGTGGGTGCAGA	[A/C]	3L	22020423			0	0
COEB21998-snp3	CGTGTTGGAGCACAGAAACCCAAGCGCACCGAGMCGATACTGTGGCACCACCAGCACCAC[A/G]TCCTTCTCCATGATGTAGTTCGGTGGGTAGTGAAAGATYGCACCGTCGTAAAACCCGCCG	[A/G]	3L	22020484			0	0
COEB21998-snp2	GGTTCAAACCSCCCGTCCCGGTACAGCCCTGGGACGGGGTGATGGATGTGTCCGAGCCGA[A/T]GCTCGGCTCSCCGGTGTACAAGCGCATGAAGCTGCTGACGGAGGAGCAGCGCGCCCAAAA	[A/T]	3L	22020683			0	0
COEB21998-snp1	CAATGGCCATCAGCATCAGCAGAACGCTACTGCTCCGGTCGCATCGCCCGAGCAAGCTGC[T/C]GACCGTACTGTGCAGCTCCAGCAAGCGCTACTCCACGATGGCGGGTCCGGAATCGACCGA	[A/G]	3L	22020935			0	0
COEB18026-snp1	CCGATCGTCATACGACCACCGGTGTTRTTGATTCCCTTRTGAAGACCTTGCCACTGACAT[T/C]GAAAAGGGGACTTTGTAATAAAATCACTCAAAATAAGAAAATAAAAACCACTCACGTTGT	[T/C]	3L	22023852			0	0
AGAMP3_3L_22024723	GCAGTTTTGGTGTAGGAACCTTTGAGCTTTCCCAGCCCGGGCAGATCTACGATTGGGTCG[T/G]GGTCGTTGGAGAAGCTTCGCTTAATTACTACGCCGTATTGGGACACCACACGCGTTAGCG	[A/C]	3L	22024723		NS	0	1
AGAMP3_3L_22025485	GCGTGCATTTGTTACAAGTTATCTATTGCGTTCCGCATTTCGACCGAATTCCGATACAAC[C/G]CTATGGCGGGTGACGTGTAGGCCGACCAACCAATGGCCAGTTTTTGCGTGGCGTGAGGCG	[C/G]	3L	22025485		IGU	0	1
AGAMP3_3L_23137021	TGCAGAACGCATCCCTATTTCGCCTTGCAGCGATCCATTAACGTCGCAAAATAACGCTTC[T/C]CCGGGTAACTTATGTGCTGACCTTGCGGTGTACCACCACTCCGGTTGCTGCCTTTTTTGA	[T/C]	3L	23137021		IG	1	1
AGAMP3_3L_25042096	TGACTTGTTGTTGGTggggggggAGGAAGGACTTTGGGAGAGGAAGCAACACAAGAGCCA[C/G]TAGTTGTCTTCCACTTTACATTCGTGCATGTTTTATCGGATCGTGGCAGGTGGGCGAACA	[G/C]	3L	25042096		IG	1	1
AGAMP3_3L_25772340	AATCGTTATTTTTTAGACGGTTTTTGACAAATTTATAACTTTCAGAAACAACGGCACACA[T/C]TGCAAGTGTGTAAGATAGCACAATGGAAAGATTAACATGAAAACATGCTACAAAATACCA	[T/C]	3L	25772340			0	0
COE131-snp3	GTCTCTATCTGAATGTGTTCGCACCGGTRCAGCATGTGGACAGTGAGCAGGAGACAACCC[A/G]TGTCARGTATCCCGTGCTGGTGTTTATACACGGTGGAAGCTTTGTAGCAGGATCGGGAGA	[A/G]	3L	25785515		NS	0	1
COE131-snp1	CTCCTGCTCACTGTCCACATGCTGYACCGGTGCGAACACATTCAGATAGAGACAGTCTTC[A/G]CTGCCCACTATCCCATTCTGGCGGTTGATGTTTTTAAACTGTGGACAYACGCTCCCGTAC	[T/C]	3L	25785583	rs5161511		0	0
COE131-snp2	GTAAGTTGRACGTTATCAGATTGAAGTGRTTTTTTGTTTGTCTCTAATCGAACACACTGG[A/G]TGTTGATTGTAGAACCCCGTGCTGGAAGATCCCGTTGATCAGCGCAACTACACCGCGTAC	[T/C]	3L	25785700			0	0
AGAMP3_3L_25788208	GACATCGCGCTATCGGACATCGTACCGCCCAGCTAGTGACAGTTTAAGCTGCTCAGTACC[T/G]CGCCGTGCGGGCCAGAAGCTTTGCCAGACAGGCTGCAAATTTGTTACACGACCCGGCACT	[A/C]	3L	25788208		IGU	0	0
AGAMP3_3L_25803612	AGCGTGAGCCTTACAAGAAAGCAAGAAAAAACCACCTGACGCCGGAAGAACGCGATGAAA[C/G]CAAATGCCGAACGCCATTAGCAAGTCCGGTACATAATCAGGGTAACGTTAACAAGAGCCT	[C/G]	3L	25803612		IG	0	1
COE140-snp3	TGGATCTCTAAACTACACCACACCCGGGAGTGTCTGYGCCCAGTACAATAATCCATTCAC[T/C]CGGGACTATGTCATTGGTAGCGAAGACTGTCTATTTGCAAACATCTAYACGCCTCGTGTT	[A/G]	3L	26087184		S	0	0
COE140-snp2	AGCGGCATAYCCTGTGCTAGTGTTYGTTCACGGTGGAAGTTACGCGGTTGGACATGGTGA[A/G]AAAGACATTAACGGGGCTGATCTACTAATAGATAGTGTAAGCAGTATAAAAGTGTTGTGT	[A/G]	3L	26087322		S	0	1
COE140-snp1	CTACTTGCAGGGTGTTGTTGTGGTGACCTTTAACTACCGGCTCAATGTTTTAGGATTTCT[A/G]AARACAAACAAATTCAACATCAGTGGCAACTTTGGGCTGAAAGATCAAACCACACTGTTG	[A/G]	3L	26087476	rs5594280	S	0	0
COE24464-snp2	GAGCGGATCGCTGCTAGCGTCCTGGTCCTTTATGTAC[A/G]AWCCGCGACTCTGCACGGAGTCGTACCTGAGTGATCTRCAACCCAAAACYGCGRTAGAGT	[A/G]	3L	26087717		NS	0	1
COE24464-snp1	AACRAAGGAAATTARTGCRCCAACCTTTTGCGCGGTCCAATTTTGAGGAATATTTGGGTA[A/G]AAGCGAAACCCATCTAAATGCTTCAATTGGTCGACAAATTCACGTGCCGTTTCACTTATC	[T/C]	3L	26088028		S	0	1
COE24464-snp3	YGCAYTAATTTCCTTYGTTCATAATTTTACATCCCAGTTGGTGGCGGCAGGTCATGTTAA[T/C]TCCAGTGAGGAGGTGTTTCAACAGATAGCAGATGTAGCAAATCTRCGATATCCTATGAGA	[T/C]	3L	26088130		S	0	1
COE24464-snp4	CCAAACTGTCCATCAAACTCAAA[T/C]CGAAGATAGTACACGGGCATCGTTCCGTGCAGTGTTTGWGCTAAATCCTGCGCCAACCGT	[A/G]	3L	26088250		S	0	1
AGAMP3_3L_26088722	AATCTTTCGCTTTTGGGCTGAAGTGTACAACTGTTTGTATTATAAAGTTTGTAAGTATGA[T/C]TGGTGATGGCGAAGCTGGTGGTAGTGGTGTTTCGATAGCAATAAAAAAACACAACAAAGG	[A/G]	3L	26088722		S	0	1
COE140-D-snp1	ACTATGACCATTACATTCCAATACGGGAAATGTGTACCTTATTGCATACTTTGAGGCGTT[A/G]ATTTCCTAACGAATAGTTACCAAAAGCGTATACCTAGCATATTTTAAGGCGGAAAATACA	[A/G]	3L	26092620		IGD	0	1
AGAMP3_3L_26951375	TTATAATTCCATATTTAGCTATTTTTAGTAAAGTACTTTGTGAAAACTACTGGGAGAAAA[A/C]CAAAACACGATGCTTTAAAAAACGTGCTTGCACAGTTGCGCTGCTGTAGCtttttttttt	[T/G]	3L	26951375			1	0
COE140-EX-150-ensang17303-U-snp3	CCCTTCTATTATACGTTCGTTAAAGGGAAATTACGGGAGAGAGAGGTGTGATTTTTGCAG[T/C]WAGCAAAGCCCCCAAAACAGTTCCCTGGTCCGGAAATGCTCAAATCTTARACATGACTAA	[T/C]	3L	28010177		IGU	0	0
COE140-EX-150-ensang17303-U-snp1	GTYCGGCCWGTGCGGGYAGTGCTKGCGATTGAAGTGAATTATTTTTAATGCTTCACACCA[T/C]CRTTAGGCATTAGTCATGTYTAAGATTTGAGCATTTCCGGACCAGGGAACTGTTTTGGGG	[T/C]	3L	28010247		IGU	0	0
COE140-EX-150-ensang17303-U-snp2	CCCTACGACTCCTGCCGCGCGTGAATCATCATGGTCATATTCGTCATGTCTGTAGCTTCA[T/C]GTCTGTTGCAAACGCATCACTTGCGCCTCCTGTCAGCACGATGGGAAAGCTAATTTTGGT	[A/G]	3L	28010366		IGU	0	1
COE140-EX-150-ensang17303-snp1	ACGAGTGAGGATTGTTTGTACTTGAACGTTTACGGGGGCCGTTTGCCGGGGGCGGCCCAG[T/C]CGGATGATGCGCTGTGGCCGGTGATGCTCTGGATTCACGGTGGATCGTTTGTGGTCGGAT	[A/G]	3L	28014170			0	0
COE140-EX-150-ensang17303-snp3	KTGGTTGCAATAATCAAGAGTTAAATGGTAAATACGAATGATATATTTTCAGAGATTGTG[A/G]AATTATTTTCACAGCCAATTTCATTGTCATTGAACATAATTAAGCGGTGAAACGAASTGG	[T/C]	3L	28014541		I	0	1
AGAMP3_3L_28018888	CTCTCATAATCTGTCAAAATAGTTGTGAGAAATGTTGATGTTCTTCGGATACTATACATC[T/C]AGACGGGTAAACGTATGATTATCATCAATAATTTATAATTTATTTTCTCTCTTGTTCCCA	[A/G]	3L	28018888			0	0
AGAMP3_3L_28853227	GCATGCGCATTTGCTTCCCACACGCATacacacacacacacGATCACATGAACATTTCCA[A/T]TAGCAGGACTACAACGCGCGCCCGCGCAAATGGAAGCAAATGCAGGGTACCTCCGCTTTG	[A/T]	3L	28853227		IG	1	1
AGAMP3_3L_30746655	ATTTACATCTGATCCGACCGCATTGCATTTGCCGGCAATGGAATTTCCCTTCCTTTCTCC[A/G]CCATAAGCAACCGACACGGTGCAGGAGGACGACATGACCGTCAACAACACGCTGCAACTA	[T/C]	3L	30746655		IG	1	0
AGAMP3_3L_32649478	GTGCTTCATGTCGTGGCAGAGGTCCAGCACGTCCCGGCACGCCTTCACGTTGATCTGCAT[T/G]GCCGTCTTCATCTTCTCATCGAATCGCACCGTGGCGGCTAGATGAAACACAATGTTGACC	[T/G]	3L	32649478		S	1	0
11786-91	CATAGGACACACGAGTGGCGTTCCAGTAATCGCACGACATACATTTGGTCCAAGATTGCC[T/C]CTAGCACACAGATAGCTTGACGGTCCTGGCCCCGAATGTCTGCAGAAACCAAATAGCAT	[T/C]	3L	33264646		S	1	1
11800-66-rs5329411	GTTCAGCATCCAGCGGAACGTGGCCTCATCCATCTGCACCTTCTCCAGTGG[T/C]ACCTCCTTCGCCTTCTCCGCATCCAGRTAGCGCTTGACCGGTTCCGCACT	[A/G]	3L	33331719	rs5329411		1	0
AGAMP3_3L_33856220	TTCGCTAGACACCACCCTAGCTGTGCTTAGGACATTAGGAACGGGCCACTGGTGGAAAAC[A/T]AGTTAGCGGGCATGTGTGTATTAGCTGTTATAAACAGAAAGGCGACCTAAAAACGGCACT	[T/A]	3L	33856220		IGD	0	0
AGAMP3_3L_33859092	CACCTTTTAAATGTACCTTAAACGCAATAATGTTTAATAATCATATTGATTCTCGTAATT[A/G]GCTAGATTAGCTGTGAATCAAGAGCTATCTAAGTTTTAAAAAATATTATCTATCTATTCT	[T/C]	3L	33859092		IGD	0	0
AGAMP3_3L_33859337	TGACCCTATCAATTAGGGATGTGCAGACTGAGCGAAGAGTGAACGATTTGAAGGCTGCAA[T/G]TGAATGTGCATGGATGTTAATGTCAGTTCGTAGATTTTGTAGGAATCTCTTCGCTATTAT	[T/G]	3L	33859337		IGD	0	1
AGAMP3_3L_33860228	TGCTTGTTTTGTTTTCCGGCTTGAGAACTTGGTATACTTGAGAAATTAAAACGGAACCAC[A/C]GAAGCTCTTGAAATAATACCGGCTTACCTTGGCGGTGGGGTGGTGTTGTTGCTGCTGCTG	[T/G]	3L	33860228		IGD	0	1
AGAMP3_3L_33860509	GCCCCCTGGGTGGGGAGGTCGTTGAAAGTTATGCTCAAGCAATGAGTCAGTCTCATGCTC[T/G]ACCGATAAGAAATGTTGTGCATTTACTGCACCTCAAAATTTTGGAACAAACAAAAGAAAG	[T/G]	3L	33860509		IGD	0	1
TPX4-snp1	TGACCTTCGTGCCGGGCTGAATCGAAACCACCGAAACCAGAACAATGCGATTAACAACA[A/T]CAACAAMAATACACGACTCATTATCGCAGTAGGCTGGCGRACTTCACYCAACTTACCGTC	[A/T]	3L	33860886	rs5739973	I	0	0
AGAMP3_3L_34554560	GGACGATCGGCTCGGCATCCAATCGATCTATGGACCGCGCAAGAAGATCTACGGCAAAAA[T/C]CCGGAACGACATACGCCGAGCACGACGACCACGACCACCACCACGACACCGGCGCCACCG	[A/G]	3L	34554560		S	1	1
AGAMP3_3L_34991704	AGCAGAATATAACATATCCCTAAACTGTAATTTAATGAGAGATCTTAGGGAATTAAGGTA[A/G]TAATATATTATTCGAAGCTGAGAGGTGTTCAATCAATATTTCTTTTCCAAAACCATTCCT	[T/C]	3L	34991704		I	0	0
AGAMP3_3L_34992033	ATGGTAAAGACCAATTACTTATTACCTAGGTCTATAATCATTTCAAGTCTGAACCTCAAC[C/G]GCCAAATGCTTTCAATACTTTGCAGTTAATTCTGCCACGAAAATATCATCTTTCTCTTGA	[G/C]	3L	34992033			0	0
AGAMP3_3L_34999863	TCGCACAAACATGCCACACAACCTATAGCCGGTAAAAGGAAGACGGACTTATCCTTCTCC[A/C]ATAGCGCCGCTAATACGAATATTGGCAGCGCCACACACCGTACGGCGAAATGAAACTTTC	[T/G]	3L	34999863		I	0	0
COEB6582-U-snp1	TGGCACTTGGAGTATCTCGATCAGTGTCTCG[A/T]TGTTTTGTTGTTCTTTTCGTGCGTCTTTAAACTTTCTGCCAGCATCTTCTTTGGGTTGCA	[A/T]	3L	35001305		I	0	0
AGAMP3_3L_35002868	TTTTGGACAATTATGAAGTCAAATAATTTCTGTTCATAATAGTATTCAGTTTTGAAAAAT[T/G]AAGTACCAATAGGTGCTTTAATAAATTAATAACCTATTAGACCAACATTAGAGAAGGAGC	[A/C]	3L	35002868			0	0
COEB6582-1-snp1	CTTTGCCCGGTGGTCATTTTCAAGCT[A/T]CAGTATACTCACAGATGCTCAGATACTGCTGCGTGGTGGTTTCGTACGTTTCCCACGTGA	[A/T]	3L	35006047		I	0	1
AGAMP3_3L_35006454	aataaaatagaaatatgataaaaGGTTATACTTTAAAATAAAACATAGAAAAGCACGGGC[A/T]ACATCCGCTCGGGCAATGAAAAGCGGAAAGTCTTGTCAGTGCATTAACTTTATTATATAC	[A/T]	3L	35006454			0	0
AGAMP3_3L_35012223	AATCCTATTTTACGGTATTAATTGGCTTCACATTTTCATCCGCTTTGCAACAGTTGGTGG[C/G]AATGCATCCCTGGTTTGCAACCGCCTTTTCAACCTCCCGCAGCCCTGTAAGCAAATAATC	[C/G]	3L	35012223		I	0	0
AGAMP3_3L_35014297	CACTATTTCTTAATTTGGGTCATTAATTTTTTAATTTCATTTCATTTCATATTATCCATT[A/C]TTAACAAGCTACGATGCGATTTTATAAAGAAATGTAGACTGCCCAGCCTTCCGTGGGCCT	[T/G]	3L	35014297		I	0	0
AGAMP3_3L_35015420	GTCCTCCAGCGGCAGGAACGGGCCCCAGGAGGGCATAAAGCGCACGCTGGTGAGCCGCAC[A/G]CCCATGAGCGCCTCGATTGGCTTGTCCCGCAGGCATTCGGTAATGTCGTCGGTGGTGGGC	[A/G]	3L	35015420		S	0	1
AGAMP3_3L_35018944	AATGCATCCGCTGCGTTTGTGCGGAACCGGGGCCACGTGAATGCACCATCATTTGCATCT[A/G]TAAAACCTGGTGCCTAGCGTGGTGCCGGGGTGttttttttttCGCTTCGAATGATGTTTT	[T/C]	3L	35018944		I	0	0
COEB6582-4-snp1	CAGGGATGATCGTGAGCAGTTCAACATTATTTGA[T/C]ATCGTTCTCTTGAGCCAATGACGAAGGGATTGGATGGATTTCGGAGATAATCGG	[A/G]	3L	35024059		I	0	1
COEB6582-5-snp1	AAACGTTACTTTTAACAGTTCGATCAGTTGTTGATGATCATACAACTCTCAGACATATCT[T/C]TCTACCTTTCCCATGTTATCTTTTACTTTTTAGTAATTTTTAGGMAAAATAACCTTTAAC	[T/C]	3L	35029421			0	0
AGAMP3_3L_35037483	ACATCTGCATAAAAACGTACACTTCATTTCTTTCTGTCAGCATTCCGATGATGAAAGCTA[A/G]GGAACGAACTACAAACACTCCTTGTTAGCAGCACATATAAGACTTCAAGGCAGGAAGAAA	[A/G]	3L	35037483		I	0	1
AGAMP3_3L_35038376	CCGTCGGTGGTGCCAATAAACACGCCCATCCTACACTCGAGCAAATGACTCTTTATCGGC[A/C]CACGTTTCTGTGCTTCTGGCACCATCAGCCTTCGACACACACAGACACATTATCTGGAAG	[T/G]	3L	35038376			0	0
COEB6582-8-snp1	CTCGCGCATCGTCGATACAAAGTCGGGCGCCATTCGGGGCGTCATTCTCGAGCTCAACTC[C/G]AAGCACCTCGAGCCAGTGGAGGTAAATTGAATTTACGGTGCACGTTTCGTGTTCGATCAG	[C/G]	3L	35045298		IGU	0	1
COEB6582-D-snp1	TAAGTRAGCATAACCCCTGCATGTGTTTGGGTTTTATGAAGCAAAAGATGTACGTAAAGT[T/C]CCCAACAGCTTGATAGAGCAACTGATTGGGCCGTAGAATGTGCAGCTTAAATCGCTTAAT	[A/G]	3L	35049764			0	0
COEB6582-D-snp2	ACCAACCGAAAGCGTCCATGATTGATAACGAGCTTCCGATACCACGTTGCACATCGTTCG[A/G]GCATTAAGTRAGCATAACCCCTGCATGTGTTTGGGTTTTATGAAGCAAAAGATGTACGTA	[A/G]	3L	35049829			0	0
AGAMP3_3L_35060146	CACTTTCCTGGAATGGCGGCTTTCGGTTCGTAATTAAGGCTGTCAGTTTTCCCAGCTCTA[A/G]GCCGCTAGTTGCGCACAGTTGCGCTAAGCGCATTTAACGAGCTAACGAGCTTTCGTACAA	[T/C]	3L	35060146		IG	0	1
AGAMP3_3L_36443952	CGGCACGGCCAGCTTCGCCATACCGTGCTTTGTGGTGCTGACGTTCTTCATCTACTACTA[T/C]TACGCCGTGTCGACGGCCAACCGGCACATGGTGCAGGTGCTGAAGCAGCAGCTGGTGCTC	[A/G]	3L	36443952		S	1	0
RPS26-D-snp1	TATGAGAAAATCAATCGCAGTATGCCGTTGCTTTCGGATCGTTCCAGATGGCAGAAGAAG[A/G]GTGYATMAACACAGCATCATTAGTTGGACGAAACTKGCTAGAAAAGGAAAGTTTTTATTC	[A/G]	3L	37650456		IGD	1	0
AGAMP3_3L_38353813	CTCGATCAGATCCTGGGCGTCGTAGTCCTTTTTTTGGTTTGGGGCGGGCGTAAGCAAAGG[A/G]GGAGAAGATAGGTGAGAAAATATGCCATGCGGGCAAGGTGCCATAAGCGACGAACCTTCT	[A/G]	3L	38353813		I	1	1
AGAMP3_3L_39809816	CTCCAGCGACCCAACACCAATGTCAAGGACTAGGTCAAGTCTGCTGCCCGACTACCTAGA[A/G]AACGTGTGCCGTGCACTCTATGCCACGTCGTCACGGCCTACGTGCATTGCATGGCTGGGA	[T/C]	3L	39809816			0	0
AGAMP3_3L_39809907	TCACGGCCTACGTGCATTGCATGGCTGGGAAAATATCAATATGCTCCTCCCCAGGTGCAG[T/C]AGCAAAACTCCCAGTTGTGGCTGTGCTGCCGTTGTAGGAAGTTTGTTGAAAGTGGTTGCC	[T/C]	3L	39809907		IGU	0	1
CYP9J3-U-snp1	CGGACTCGGATTGCGCGAGCTGCCCATCGAGCTGCCCTCCTCCGACTCGGCCACGTATCG[A/T]CCGTGGTGGTGCTGACGGTTCTGCTGCGGGTGATGAATTTCATGGTGCAATTGGGTCAGC	[T/A]	3L	39810860		IGU	0	0
CYP9J3-U-snp2	ATGAATTTCATGGTGCAATTGGGTCAGCAGCTCCTCGGCCGGTGGTGCCGTCGGTGGCTG[T/C]CCCGGCACACTGTTGGTGCGTATGATGAGCTCGTTCGTGGCCGCATCCCGCACGACCGTA	[T/C]	3L	39810953	rs5318704	IGU	0	1
CYP9J3-U-snp3	ACGGGAGCAGATCGTAGCTTCCGCACCACCTRCCTCCCTGTCCTCCTCTCCCCAACCACC[A/G]CAACTGCTCGAAACCGATCTGGACGGGATGCTGGTGCAGGAGCGGCCAAGACAAGCCGGY	[A/G]	3L	39811109		IGU	0	1
CYP9J3-snp2	CCGCACACATGTGATGATGGTG[A/T]CCGAYCACTCACTTACCTTGCATTCGGGAACGCGTCGTACAGATTTTTGAAGTGCTCGAA	[A/T]	3L	39812106		IGUD	0	1
CYP9J4-snp2	TCCGATGATGCTGCGGCGCCGGAACATGATCCAGCACATCGAGGCACTGTACTACAGCCA[T/C]CCGGATRCAAAGTAAGTGATCTTTGAGGGACAAAAAGAGAAGGAGAAAATCGGGAAAAGA	[T/C]	3L	39815149	rs3401875	S	0	1
AGAMP3_3L_39815425	CCACACCCCATTCCTGCCGAACGAGAGCGACATCGGCCAGTCGGACAACATGTTCCTCAA[T/C]TCGCTGTTCATGCTGCGGGGCCAAAAGTGGCGCGATATGCGCGCAACGCTCAGCCCCGCC	[A/G]	3L	39815425		S	0	1
AGAMP3_3L_39818584	GCTGGCAAAAGGGTTTACACCGTTAAGGTCAGAAAAGGGCATATATCTGCAGCTGAGTCC[A/G]CGGAGGACTAATTAATGTTCGCACATGATTTTACAAATGTTGAGTTCACAAATGATTGAA	[A/G]	3L	39818584			0	0
CYP9L2-snp3	GAATATCAGRCACTGWGCTAYCATTTCATTCTCGCTGAGCTTTACCATATCTTCTGGGAC[A/G]ACCTTCTCATCATTGGATTCCTTTGCCGTTGCAAAGCCTTCCACTTCCTCGTGATCTGTT	[T/C]	3L	39819923		S	0	1
CYP9L2-snp2	ATACAGAAGARAGGTCATGACAGATGCGATTATATCAAAGCCAGCTAGGAAGAATATCAG[A/G]CACTGWGCTAYCATTTCATTCTCGCTGAGCTTTACCATATCTTCTGGGACRACCTTCTCA	[A/G]	3L	39819974		S	0	1
CYP9L2-snp1	TGATATAATCGCATCTGTCATGACCTYTCTTCTGTATGAGGTAGCTCTAGATCCCGAAAT[T/C]CAGCAGCGTTTGTACGAGGAGATTCAACAAGTGTCAGAATCRCTAGATGGAAARTCAATC	[A/G]	3L	39820058		S	0	1
CYP9L1-snp2	TMWTCTTGTTTTTTYTTCAGAATGTACGGTATGTTCGAGATGTTTACGCCGATGTTTGTC[A/G]TWCGYGATCCGGAGCTGATCAAGCAGATCACGGTGAARGAYTTCGATCACTTTATCAACC	[A/G]	3L	39821279			0	0
CYP9L1-snp1	TATCTTTGTCTCGGAAYGAGTTGACGTGCACACCAAACGC[A/G]CARGAYGCTATCACATCGTTTGTGAAGCGGATKAACAGATCYTTCACTTCAYATTCACGC	[A/G]	3L	39821602	rs3401997	S	0	1
AGAMP3_3L_39833833	GCACATGAAACACACAATCTAGCTTACACTTGGCTTACttttttttGCTGCCTCCCCCGT[T/G]TTGGGTCTTGAGATCTTCTTCCCGAGGcacacacacacacacacaTAAGCGCTTGCGCAC	[A/C]	3L	39833833			0	0
AGAMP3_3L_39834746	TGCGTGGGGTGTGTGTTGGTGTGTGGATTCACGCATTGCTATGGTTTCCTGGTTCGATCG[A/T]CTAACAACTacacacacacacacGTGCGGCTGTACGCATTTTGCCTCTCTGTGTGATTCC	[A/T]	3L	39834746		IGU	0	0
AGAMP3_3L_39836499	GTCCAAGGGCAGGATGGAGATCAGTTTGATGGTGCTGGTGCCGCTGGTGGCCATCCTCGG[T/C]TTCATCTATCATTACATTACGAAGGGAAATAAGTATTTCCATGATAAACCGATACCCTCG	[T/C]	3L	39836499		S	0	1
AGAMP3_3L_39836608	CCGATACCCTCGTTGGCGGCGGAGCCACTGTTTGGCAGTACGCGGCGGCTGATGATGAAG[A/C]AGACTTCGTTCCATGATTTTGTTATCAGCATCTACAACAAGTACCCGCTGGTGAAGTAAG	[A/C]	3L	39836608		NS	0	1
AGAMP3_3L_39837314	CACCGACCAAAAGTGGCGCGATATGCGAGCGACGCTCAGTCCCGCCTTCACCGGCAGCAA[A/G]ATGCGCCAAATGTTCGAGCTGATCGTGGAGTGCAGCAGCAACATGGCCCAGCATTACAAG	[A/G]	3L	39837314		S	0	1
AGAMP3_3L_39839515	CAGCTCGTGCACGATCAGCACGCGAACGAAGCGCATCATCTTCGACACCATGTCACCGGA[A/C]GCGACACGTCGCGTGAGAATCTTTGCAATCAGCCCATTGTTGATGCCGTACCGTTCGGCT	[T/G]	3L	39839515			0	0
CYP9J5-D-snp2	GGACGAGGCCTCGGAAAAGATCGATCCAATACTGGGKTCRCAGATCGGGCGGAATGGTGT[C/G]GGTCGCCCGTCATCACCGAACACACCAGCGCGGGACGYAACGGACAGCCAGCAGCACCGG	[C/G]	3L	39841873	rs5257960	IGD	0	0
CYP9J5-D-snp3	CTGYGAMCCCAGTATTGGATCGATCTTTTCCGAGGCCTCGTCCACGACGGACTGATCCAG[T/C]CGCATGTACTGGGAACAGATGGCATGGTTTGTAAACACCTCGAATGCGTCGTCYTCCAGC	[T/C]	3L	39841951		IGD	0	1
AGAMP3_3L_40263177	AACATGGCGTCTTTTGGCTCGCCATGCCAAGCCTTCCGTCTTGAGCGTTGCTGAAGAATG[C/G]TACGGTTCAAAGAGGAATCGAAGCATATTTTATTTATAGATCTCATATGCTACCAAATTC	[C/G]	3L	40263177		IG	1	1
TIF-ak-8705-snp2	GAGTTGCTGCTGCTGCTGCTGTTGGCCGTTTTCCGACCGCTGGCCAACTGTCGTCGGAGC[A/T]GGCAGTGCTTTTTGCAGTGCAGCCGCCGTTAGTTGCTGCTGACCCATTGCCACGTGGTCG	[A/T]	3L	41137750	rs3402101	S	1	1
GPRnpy3-U-snp2	GGTACGCGTCTYAKCAGGAATACGAAATCGAACCTGCCGAGAATACATTGCCAAAATGCA[T/C]AGACGCCCGCTCGTTCGACGGTTCGTGCGAGTAGCGAAAAGTCAAATAGTCAACCGGCAC	[A/G]	3L	41304277	rs5053999		1	0
AGAMP3_3L_41307946	TAATGCGTCCTTAAAATACAGCACCAACTGGAACCGGCTTGATTCTCGGAAGTGCTATTG[T/C]TGCTTATTCCAAGTGTTCCAAATCACGGCTACAAAAAGCAAATAATTTGCTCATCCCCTT	[T/C]	3L	41307946		IGD	1	1
AGAMP3_3L_41309580	CTCACAGTACATAGCACTGGAAAGCGGCCCCGTAGCATTGTCCGTCCCATTCAAGGCGAC[A/G]CCGTGCAACTTCATGTACAGCCCGTACGGCATGGTCACCATTATCGCAAAGGACCATATC	[A/G]	3L	41309580		NS	1	0
AGAMP3_3L_41313534	ACCTCGAACCAGCAGTATTCAGCTGGACGGAGAAATCCATTGGTCTATGTTCGCGATTAT[C/G]GTGCGCCGTATACGTGTCAATTATGAACAATGGATGAATTGATGACAGAAATAGTAGAAG	[G/C]	3L	41313534		IGU	1	1
GPRnpy3-D-snp2	CGGCCATCGGGAGYACAACTTTGTCACCATGGTAACGCGTCGCGATGCTTCGCTGTGGCG[T/G]RAAGGAAAATTGTTTTGTAACGCACCAACGAGCGATCACAGCGTGATAGATAAGCGAGCC	[T/G]	3L	41314629			1	0
AGAMP3_3L_41724212	CATAATCATATTCATGGAATCTATCATATCTTCGCCAAATCGACTAGCTACACGGTGTTG[A/G]TCGTGGTTTCCAAGCTAAAATGGATACAAGTTGCATTCGAGATTAAATGTAATACATGCT	[T/C]	3L	41724212		S	1	1
AGM1-U-snp1	GCGTCTAAGGCATTAGTGCGTCTTGATACACAAACACACTCATCGCATTGCATTTGGGGT[C/G]CAAAGCATACAATCGCATCACGATCGCTTTCCATGCTTTGYGTACGACGGGAAAGACGAG	[C/G]	3L	41725640	rs5120395	IGD	1	0
AGM1-snp2	CGACGAGCTAGCGATGGAGGATGTCTTCATCTCCTGGAAGGACACCATCGATCCGGCAGC[C/G]TGCAATTCTAACCCCAAGGACTATCTGCTGTACAGCCGCGACCCGGTGCGAACACCGTTC	[G/C]	3L	41730507		S	1	1
AGM1-snp1	CGCTTTGTAGTTGAGGGTTTTGTAGTTGGAMGCGACCGGTAGCCAGGTGGTGCGGTTGGT[T/G]GAGAAACCGGCACTAACCGAATCGTCCCACTGGAACGGTGTTCGCACCGGGTCGCGGCTG	[T/G]	3L	41730600		S	1	1
AGM1-D-snp1	CCCTGTTGACTCTACTCATGCCTAGTTGAAGCAACCATACGAGTTACCAAAAATTTCAAA[T/C]CAGCCCATTTGATCATTCAATCAAACAAATCAATTTAAGAACACGCGAAGTATCATCAAA	[A/G]	3L	41734448		IG	1	1
GABA-A-A-snp1	CACAACAGTTTCTAACTAAATCTTGTAGACAGTATCGGGCCTTAATTCAACTACGTCTCT[A/C]TTATTGGCTTCCATGCATGCAGGATTACTCGATGGATTGCTACTTYCGACAGTAYTGGCG	[T/G]	X	494686	rs5586930	IG	1	1
AGAMP3_X_835506	TTTGAAAAGCGATCTGCCACAGCAAAAACAGCTCTCTTCTGCTCCCCGCACGTGTTTCCC[T/C]GTTTTGTGGAGTATGCGAAAGCATTTGGTTGGAAAAAAAGCATTTAAAAACAAATAGGAT	[T/C]	X	835506		I	0	1
px15-snp1	GTCCATCGCCTGGGCCACCTGGTTCATCAGCCCCATCAGATACTCGTCGTACACGCCCGC[T/C]CGGTACAGATCGTACGGTCGGCGAATCAGATCCGACAAACGCTTGGAGGCGATAAACTTG	[T/C]	X	839938		S	0	0
AGAMP3_X_842980	AATCTCCCGGTCCTCCCCTACCAACGTTCCACCGCCCCCTACGGTAAGCAGTATCGAACC[A/G]TTGGCCGGATTAGTGACGCTGTACTCGAGCCCGCCAGCGGACGCCGCCGGCAGCCGTATC	[T/C]	X	842980			0	0
AGAMP3_X_1453967	CGGCAACATTTAAGGGAAGCGTTAGTAACTCACGAAAACGGCTTGGCCGTTCGAGAAGGC[A/T]CCGTTCGGAGCTGTCCAACCAACAACAACTAAAGATGTaaaaaaaagaagaaaaaGCAAC	[T/A]	X	1453967		I	0	1
AGAMP3_X_1455583	GCTTAAACGTCATATTTCGCTGTGTTTCAGAATGTTTGTAAAGCCCCAAGAGTGCCACTC[A/G]CTTTGGGAGCTCACGTTTATCATCACTTTTACTCTCTTACGCAAACAGTCAAAAGAAATG	[A/G]	X	1455583		I	0	1
AGAMP3_X_1457421	GTATCGCGATCGCAAGCGGCTGCAGCACATTGCATCCCACTTCCAGGGTCCGAAACCGCA[T/C]TGGCTGCTCGGATATTTGCCATTGTTCCCGGTCAACGACATACCGGGCATCTTCGAGACG	[T/C]	X	1457421		S	0	1
cyp4h19-177	TGCGTTTACCTTCTATCAACTYGCTAAGCATCCTGAAATACAGGAGAAGCTACACCAGGA[A/G]CTYCAAGATGTGCTCGGAGTAGATTATCGCCAYGTACCSTTGACCTATAATACACTCCAG	[A/G]	X	1458339		I	0	1
cyp4h19-315	CATGGTAGTGAAGGAGTCGCTGCGRCTTCTACCACCCGTTTCGTTCATTGGACGTCGGTT[A/G]GTGGAAGATATCCAGATGAAYGGYGTAACTATYCCAGCCGGCACTGACTTTACCATCCCC	[A/G]	X	1458477		I	0	1
CYP4H19-H24-inter-snp4	GCCASCCCGTATACAATCAGAATGACCAGCAGAAACAGTACGAACGACATGTTGATACCG[T/C]TGATGCTCTATTTTAACAGACAGGGTTTGATTGCTCGACCGTTCCGCAGCAGTTCTGTTT	[T/C]	X	1459354		I	0	1
CYP4H19-H24-inter-snp1	GTACTGTTTCTGCTGGTCATTCTGATTGTATACGGGSTGGCGCAGGTCTATCGTAAGCGA[T/C]GCCGGCTGCACCGCATTGCGGCCCATTTCGACGGTGCCAAGCCGCACTGGCTGCTGGGGA	[A/G]	X	1459434	rs5389600	I	0	0
CYP4H19-H24-inter-snp3	CCGCATTGCGGCCCATTTCGACGGTGCCAAGCCGCACTGGCTGCTGGGGAACGTGATGGA[A/G]TATCCGGCCAACGACATACCGGGTATCTTCGAGACGATGGTAGCGCTGCACAAGCGCCAC	[A/G]	X	1459505		I	0	1
CYP4H19-H24-inter-snp2	TAAGGATCTRTTCAACTGGGGCCTCCTAAACGATCACATGATTACCGTCAGCAGTGCCGC[T/C]AACGTGGAGAAGGTAGTGATGGCAAAGAGGACGGAAAAATCCTCCGTGTACGAGTTCATC	[T/C]	X	1459628		I	0	1
Cyp4H24-up-snp2	TCCAAGAACGTTYCCCTACGCTTTGTGTAAAGATGTTCCTCATCCAGACACTCCTGCTCG[T/C]TAGACACTTGCGAGCTYCTTTCCAACAGCTGTTCCCGGCGTTTGTGGATCACGGTGTCCG	[T/C]	X	1460167			0	0
Agama4-snp1	ASARTTTAAAAAATCAAATCATGACCACCAATCTCTGGGTGGAGCAGGTAAGTGTTTCGC[T/C]TATCGTTTTCGTTTGCGGTGGGCGGCTCCAGTGCCACAGTAGCCGGAGGAGTGGCAGAGT	[A/G]	X	2120630		I	1	0
AGAMP3_X_2836759	AGTGGTTGCGGTTAGGTGATAACCGCTCGGCAACACACACTCTCGCTCTCTCTGTCTCTC[T/G]TTGTACAACATCTTCTCGGTCAGCCGGttttttttttCGTGGGACAGTTTAGAATGGCGA	[A/C]	X	2836759		IG	0	0
AGAMP3_X_2844900	CTCTCACAGCGAAAACAACAGTGCGAGCAACGACGTCGGGTCTCGAACTGACGGTATCGG[A/T]ATCGGACCACAGGTAAACACGTTTCAGCTTCCAAAAATTCCTACACCTGCACGTGCCAGC	[A/T]	X	2844900		I	0	1
AGAMP3_X_2848130	TCCTCTGTCGATACTAACCGATAAATCACTTACCCTGCAGGATATGGAACTGTTCACCGG[T/C]ATTCAGGTAAGGGGTGAGCAGCCGCCGCACGTCTTGGCCTTTGCCAACCGCTTTGTAGCC	[A/G]	X	2848130		IGUD	0	1
GSTMIC2-D-snp1	TGCCTTCTYTGGCWGCAGCACGTAGGYTTGWTACAGTTTCACTCTCTTCCAGCTGATTAT[A/G]GTGTACCTCCGTTTCACCCACAATGGCGGTCTCGTTAGGAGGAGCCTGCGTTTCGTCATT	[T/C]	X	2848422		NS	0	1
GSTMIC2-D-snp2	GGTGAATCCTGTCATTATTGTACAATTSMCTTTTTCCGTTACCTTTTAGCGCTCTCATCA[T/C]TCGACGGAGAAGAAGTACGAGTGTAAAACGTGCTGCAAAAAGTTCAACCACCACAGCAGC	[A/G]	X	2848819		S	0	1
AGAMP3_X_2850640	TGATATGTGAACTACACCTAATCAATAATCGGCAAAAAAACGGAATGTTGGCGCATACAT[T/C]CGCACCAAAAAAATAACCGCTCCCCGTTGCGTAATGCCGCCTTTTGGCGGATCTTCTGGA	[T/C]	X	2850640		I	0	1
AGAMP3_X_2850977	GTCGATCAAGAAACGATTGCACGATATGGAAAGGAAATTAAAACAAAAACACTCACACAG[A/C]GGCTACGCTCTAATGTTGCCTCACCGTTATAATGCTGCCTGCCTGTGCGCCGGTGCAATT	[T/G]	X	2850977		I	0	1
AGAMP3_X_2851060	ACCGTTATAATGCTGCCTGCCTGTGCGCCGGTGCAATTGCAAATGCGGGCGCGACTGCCC[A/G]GCTGAATGTCAAGTTCGGTTTTCAGCGTTGCCCGGGAGGAGCATGGGCGACGTGAAGCGT	[T/C]	X	2851060			0	0
AGAMP3_X_2853245	CCTGAAGGTAAGAGCACGCACCACACTGCGCGTTTGGTCTGGTTAAAAGATGAGATTATC[A/G]AACCACTGCCACCGCTTGCTCTGCTTCTCGTCCACGACATAAGATATGCATTTGCCTTTG	[T/C]	X	2853245		S	0	1
GSTMIC1-D-snp2	GTATTGACATTGAGAAGATGTCATTTCCGCCTCAAGAYATCCAAGAACTGTCCGAATTG[A/C]ACTCTTTGCAATAGTTGTTGGACGTCTCTGAACGGATTGACAGAACCAGTGTAGTAAGCA	[T/G]	X	2853970		I	0	1
GSTMIC1-D-snp1	ACGTTCCAAGGGTAATTAAAATGAACTCGTCCATCAGACCATCACAGTCAAGCCTAT[C/G]CCTATGAGTGGAAAATTCTTGATGTATCTGTTGCTTTGGAGTTACGACTTCTTGG	[C/G]	X	2854105		I	0	1
AGAMP3_X_3061324	AAATAAATAAAAAATAACTCGAATAGAACAACATAAGCACAATATTTACCCGAAATAGGC[T/G]GTTTATATGTTTTCGTGGCATATGCGTAACTAGAATTTGAGGGAGCAAGCCAGAAAGAAG	[A/C]	X	3061324			1	0
AGAMP3_X_3171471	AGTGGAGCGAGCTACGGTGTCTCCGCTGGTACAGAAAGAAAATGAGAAAAACGGCAGCAC[A/T]GCACACGGGAGACTGGGCGCGAGGTGGCGACGCTTGAACGAATGGATTTGGTGCCCGCGC	[T/A]	X	3171471		IGU	0	1
AGAMP3_X_3176088	CGACAGGGCATCAGCCGCGTGTGGAACGGTCCCATACCGTACGTGCTCATTTCCAAAGCT[T/G]CTGCGGTCGAGGTAAGTTTGGGGTTTTACTTTATTTTGCTAGCGGTGGCGAGAACACAAA	[T/G]	X	3176088		NS	0	1
AGAMP3_X_3176704	GTCATAACCACGTTTTCTCGTACCCGTGCAGTGCTACAATTAATAACACACCAAACGATC[A/G]ACAAAAATACCGCGGCCAATCttttctttttttcttttttttGGGGTGCGATTTTCTCTG	[T/C]	X	3176704			0	0
CYP4C26-snp2	GCGCAACTCCTCCTTCCGTTCGCGCACGACGCGGTCGGAGAAGTTGTGCAGCACCTTGAG[A/G]CATTCCTGGTGCTTCTGGAACTCTTTCGTGCGCTTGAAGACAAAGTCCGGATGGAGCCAT	[A/G]	X	3177769		S	0	1
AGAMP3_X_3182922	TTAATCCTCTTACCCCTTCCCAGTTTTATAACGATATTTCATGATTTTAGAACTGTTCAA[T/C]CGCATCATCGCATCCCGAAAGCTGTATGGACGCCGCCAGGGTATAACGCGCATCTGGAAC	[A/G]	X	3182922		IGUD	0	1
AGAMP3_X_3186241	CCGGATTGCTAACCTCGACCGCTTATTAAATCATCGACCGCTAATGACCAACCGATCGCG[A/G]GAGAGACATTCGCAGAAGTAAAAGTTTGATTGGGCCGGGCGGCCGCAAAGACCCGCACGG	[A/G]	X	3186241		IGD	0	1
CYP4C25-U-snp1	ATCGTGTCGCTGGCAAATRCTCGAATGCAGCCGACGCAAAGGGCAAACCCCTTGCGCGTA[C/G]AGAGGTGAAGTGATTGTCTTCCCTCTAATTGATCGACATCCGCCATATACACACACACGC	[C/G]	X	3186403		IGD	0	1
AGAMP3_X_3191445	AGCGCAAACAACAGCGCGGAGCGAACGCAACCTTCCGCGAGGAGTTCGTACAAACGCTCG[T/C]GCAAAGGTTATCCAAAGGCAATCGCATCCTCCAGTTGCTATCATACGAGGCGTCAGTGAC	[T/C]	X	3191445			0	0
AGAMP3_X_3192389	TGCGCTACTGCTGTACATGCACAAGGGATGGGGTTCAATACCGCCAGTTCACGGTGTTAC[A/G]TAGCAGAGGCACATTTTATTCCGCCCTCGTTCGCatgtgtatgtgcgtgtgtgtgtgtgt	[A/G]	X	3192389		IG	0	1
AGAMP3_X_3195805	CTGCTTACAGAAGATACTAGCAGCGCCTAGCGCAATATGTAATTCAAGTCTTTTTTGATG[A/T]TGCTGCCTACTCATATTTTGTACAttttttttCCCCCAAAATCTTTTCCTTAGTGTGCTA	[T/A]	X	3195805		IGU	0	1
AGAMP3_X_3197805	TTCCACACACCATTGTCCAACGGTTAACAGATAAAGTCCGATAGAGCCACCTGACGCCCT[A/G]AAAGCCCAAACAGTACGGTTCTCCCACTTCTCGGATAGGAATGGCCGAAAAATGAGCGTC	[A/G]	X	3197805		IGU	0	0
AGAMP3_X_3198954	TTGGAGTAGCGTGTGACGTCCGTGCTGTTAGAGTCTGATGCGCAGTTGTCCAAAATGTTT[T/C]TGTTTGATGCGGATTTAATAGTTGCCTTTGCAAGTCGCTGCCCCAAAGTCCAGACACACA	[T/C]	X	3198954		I	0	1
CYP4C25-snp1	GAGCGCCGTGCTGGTGAAGCGCCTCGAGGCGGAGCTGGRCAACGAGCAGGGTTTCAACTG[T/C]TTCCCGTACGTGACGCTGTGCGCACTGGACGTGGTGTGTGGTAAGTAGGGCCTGCCTGAG	[A/G]	X	3199473			0	0
CYP4C25-snp2	GCGCATTCACCTGCCTGCCCATGGCCGTTTCTGTSGYGAAGGAGGCGAAAACATAATTAA[A/G]TACGATAACTGATGCCGCCCGGCTGAACCCTGCCAATGCTCAGGCAGGCCCTACTTACCA	[T/C]	X	3199572		I	0	1
AGAMP3_X_3202269	TTAATGTTGTATTTTCTTGTTCATTTACCCATTTGTGTGTTTAATTCCGATACGTATAGG[T/G]TTTCTATTTCTTTGTGTAATTATAATATTACCGGCGCATTATATATATAAATATGAATCG	[T/G]	X	3202269			0	0
AGAMP3_X_3205483	AGTTTTGGGAAGGTAAATCTTTTCAAATTTAAAATCAAAATTACATTATTATTTTTTTAA[A/G]CACGTATAAGTTTGACCGAATGTGTAGACATATATAGCTCATGATTTAAAGCCCATTTGT	[T/C]	X	3205483		I	0	0
AGAMP3_X_4034168	AACAAAACTCAAACAGAAGTTAAACAATCAAACACCACCAGGCGGAGAAAAAGATGCCAC[A/C]AAACAAATAAAAGCTAAACCTACCATTTTCCGGCGCGCCTTGGTTTTCGAGGGGGAAGCG	[A/C]	X	4034168		IG	1	1
AGAMP3_X_5059693	AAGAATGTGTCCGGAGGGGGAGCGATGCTTAAATCAAACAAATTCGAAGGACAAGTTACT[T/C]ATGAGTTTTGCTTTCGTGTGCGCGTATTTACCGCATCTCAACCCGGTCTCGCATCCGATA	[A/G]	X	5059693		I	1	1
AGAMP3_X_5108325	TCCAATTGTCACGGTATTGTGCACTTAATAAGCATGCTAACAAAGCACTCTCAATTAAAC[C/G]ACCGTGCGCGCGCGGAGGTTTTATGGGACCTTGCTGTAGTCATCCGTCTGCGTTTGCAGG	[C/G]	X	5108325		IGD	0	1
AGAMP3_X_5109183	CGGGAAGCAATCGTACGGTAATTTAATGTAGAGAAAAGAATTCTTGATTAATGTGCAATA[T/G]GATTAATGGTTTTAATTGCAGAGCTTCTTGGAAGTAGATGCAGCATTGTTTATAACATAA	[A/C]	X	5109183		IGD	0	1
AGAMP3_X_5112041	TGTGGCATGGTAGGATTCGGTaaaaaaaaaaaacaaaaaaaTTGGAACCGCTTTAAATGC[A/G]AAAAACAACAAAGCTACACACCGCGTGTGTACACTGAAGCGTGCGCCCTTCTTTACGTCT	[A/G]	X	5112041			0	0
db5451874	AGCGTAATCGGCTAAGGGCAGCTTGGCAATACTGTTTGCGCTGGATGCTTGTGATAACAG[C/T]CACAGCTTCCAGCTTGCTTCCGAAAACGAATACCTCCCATCAACGCATATACCTCG	[A/G]	X	5112170	rs5451874	IGD	0	1
AGAMP3_X_5119127	CCAAGCGGGATTCGGCTGCTATCCGTTGGACGCTTGCTGGCTGTAATATAATCCCCGTAG[C/G]GTGGTTAAACCCTTTCCGATAATGCTGAGCGTAAGTTTGAGGTGTTTTCAATCAAGATAA	[G/C]	X	5119127		IGU	0	1
Agama3-D-snp1	GTAGCTTAATGCTCATYGCTGATACTCGATSAATGTGYGTCATGGCATGCCGAAAACGAC[A/C]TGCGAATGCTTGAGTTAAATGCGATACTCTGACTGWCAAGCTGAGTTTAWTGCCGGAGMA	[A/C]	X	5785461	rs5398211	I	1	1
SMG-U-snp1	ATCGGGCGCAGGCGGACGACGCGAACCGGCTGTTCGGTGCGCTGCTGACCGCGTTCAACA[A/G]CGTGTTCAAGTGCCTGCAGGATGCGGCCGGCGATGGGACCTTCCTGCTGCAGCCGGACGA	[A/G]	X	6780936			0	0
SMG-U-snp3	ACCACCGACGGGGCTRGCCGTGGCCGCCATTTGTGAGTTCATCATGCTGAAGCTAATGCT[T/G]CCCGCGACCACCCTAACGCCGCTTGGAGAGGACGAWCTGCTGGAGATTG	[A/C]	X	6781120	rs5702066		0	0
SMG-snp1	CGACAACAACATCCAGATACTGCCGACCAAGACGCGCCCGAAAAAGCTCACCTTCTGCGG[A/G]AACGACGGGCGCCGGTTCGGCTACCTGTCCAAGGGGCTGGAGGATCTGCACCTGGACGAG	[T/C]	X	6785962			0	0
SMG-D-snp1	CACTATATTCCCTTMACAAAGSTCCCATTTGTTATCCAAGATCCGTGATTTTCT[A/C]CACTCAGTTTGTCGGCTCCAGTGACTATCCCATTTTAC	[T/G]	X	6790112			0	0
AGAMP3_X_7023784	ACAAACGCGTGTGGGCGTGTGCTTGTGGGATTGTTGTTGGGTCCTCTTCTGTCTCGGGTG[T/G]AAGAACACCaaaaaaaaaaGAGTTTCGCAAAACATCGCCACGGTACCAAAAGGGATGTTG	[T/G]	X	7023784		I	1	1
AGAMP3_X_7240173	GCTCATTATATAATTGCGTTTAACTAAACATTTCCACTCCCGGTTCCGTAGTGCACCCGG[C/G]TCGGCACGTCAGCCGCTGCCCGGGGCTGCCTCCAGCGCAGCGCCCTGCTCCACACCGGCC	[C/G]	X	7240173		NS	0	0
AGAMP3_X_7250028	TTCCGCATTTTCGTTTCACCAGGAGAGTGCTGCCTTCTCTCCCCCGAATAACGAAATCCC[A/G]TTTTAAACGCAAATTGGCTGCAGCATCActctctctctctctctctctcAAACTTTCTTT	[A/G]	X	7250028		IG	0	1
AGAMP3_X_7697409	TCTATCAAACAGGTCTTACCGAGACGTCAAAAATTGACCTAACTACGTCGTCCTAATCCT[C/G]TTTTTCTGAGGCACTCGTTGAAAGACTTTGGCATCCCTGCTAGTACCAATAATAATAGAT	[C/G]	X	7697409		I	1	1
AGAMP3_X_8040327	ACACCCTTTCCCCAGACTGTACATGATTCTTGATGCTTTTTCCGTTGTTGTTTTGTTTCA[A/T]TTTAACCCGCAATGATCTGGATTGGGCCTATGGGAGGAAGATTCGACACGTTTCGGTTAA	[A/T]	X	8040327		IG	0	1
COEace10o-1-snp1	TTTCTAAGAGTTGCAGAGATGTTTCATTCCCCTTTAAAATTCCCCTAGTTGAGGCATACC[A/G]AAAGTTAAAATTACTAAATGTCAAAATCCTCAGCATTTCTGGTAAAAAGGGCGTTCATTG	[A/G]	X	8049634		I	0	1
AGAMP3_X_8053050	CCTCACACCACCCCAGTACACGGGATGGGAGAGTGGCAACGATGGGTACCAGAACCAGCA[T/C]CAGGTCGGGCGGGCTGTCGGGGACCACTTCTTCATCTGTCCGACGAACGAGTTCGCGCTC	[A/G]	X	8053050		S	0	1
COEace10o-2-snp3	GGAATTGTCCGACTATTATGAGAACCCCTGGAAAACCCTGTATGGTTCTTTCTATTAGTT[A/C]TTCTCTCTCACTGCTCCTTTTTATGCCTTATCCGACCTTACCCTTTCCTTGCAGTGCCCT	[T/G]	X	8053958			0	0
AGAMP3_X_8057740	TAGTATTATGAACAATCACACGCAAACGCACGCCGACACCTTAGCAAGTTCCTTGTGAGT[A/T]GTGAATTGAGTTGTGTGAATTGAGCGGTATAGCATTTCCGAGACTGTAAACTTAAGCGTA	[A/T]	X	8057740		IGD	0	0
COEace10o-D-snp1	CATAGAGGCATTTGTGCCCCTCGCAAGCACACCAAGCAC[A/G]GCAAGTAACGTAAAAAACTACTAAACGTCGTGCGGTGGTTACTACACTACCCTCGGACCA	[A/G]	X	8058034		IGD	0	0
db5571508	TTATCACTTTAGATTCGCCTTGTTTACACACAATCATCCTCAGGGATGGGACAGCTCTCC[A/G]ACCCCGCCTCCCCCAAACCCAACCAACTATCCCTTAAACCGCCCCCCCCCCTCCCC	[T/C]	X	8791673	rs5571508	IGD	0	1
P45EX234-240	CATTTTGGATGCTTTTTTAACCGCACCGTGTACCGTTTTTGTGTTTCTTTTAATCTCGCC[T/C]TTTCTGCTACAGGAAGAGCTGCTGATGCTGAAGGACATCGACAAATCGTTGGCCGTGTTT	[A/G]	X	8794806		I	0	1
P450RED1-517	CGACACGGACAGCAGCAAGAAGCATCCGTTCCCGTGCCCCACCACCTACCGGACCGCGCT[T/C]ACCCACTATCTGGAGATAACGGCGCTGCCGCGCACCCACATCCTGAAGGAGCTGGCCGAG	[T/C]	X	8797751		S	0	1
NADPHP450red-snp1	CTCCGAGGACTACATCTACGAGGATGTACGTACAAACACCGGGACTTTGGGATTGCGTCC[A/T]AGGAGCAGCTTGAGTTGATTTTTTTTCTCCTATCATTTCCGCAGGAACTGGAAGACTACT	[T/A]	X	8798402		I	0	1
AGAMP3_X_8800106	ACTGCTTTATCtttttttttAATATTATTTGTTACATGCTTATGCATGAGCAGTACCAAA[C/G]CATGATAACAATGAAAAGGTTGCTCTaaaaaaaaaatgataacaaaacaaaaaaatataa	[C/G]	X	8800106		IGD	0	1
db5599785	GTGAAGAACTGGATGCAGAATTGAATAAACCATTTAAAAAAACCTAAAAGAAAAATATGC[C/T]AAAAAGCCTGCAACCAGTCCAAAAAGCCAGAGGGATGCATCTACATTATTAAATTG	[A/G]	X	8800318	rs5599785		0	0
db5630503	GACGAGCAGCCACAGGATGGCGAACGCGGCCTGGCGCGAATGCAGCGGTATCGTGTACGG[A/G]TCCACCTCCTCCTCCCGCTCGCTGGTGGCGGTCGTCGCCGCCGCCTTCGCTACCGC	[T/C]	X	8802208	rs5630503	I	0	1
db5645552	TTCCCGAACAGTGCCAAATCGTTCTGGTCGCGGGCCACGCACCTGCACGACCAGTTCCTG[C/T]TGCAGAACAAGGTACGTACGGAGAGTGAGAGAGAGAGAGAGTAACCGGTCCTTATT	[T/C]	X	8803051	rs5645552		0	0
NFAT-1-snp2	AGTATTTCYGGCACGCCCGGTGGTTGCGCTGTTTAGGRCAGATGGGAATTGAACATGTTA[T/C]AGTAGTGATTCTATCGCCCCAAGTTACACGGCTCGCCCKCCTATACTCACTGCAGATRAT	[A/G]	X	9581216			1	0
TRXR-u-2	CTGATTTGAGCTTCGTTTCAGTCATGAGTGTTGGTGACTGAAACAGTGACAGTTGATAGCACTGTTCACAGCCGGAAAAAGTCATGATTATGCTTGTGACGGCATTATGCTCAGCTTGCGAGTCAGAGTTTCGCGGTTGACTCAAGTCATGACGCATCCAGCTACCACAGATATGTTCWKTGTTTTCKTCGGTGAATTTGTCGCGATGCTCATGGCATTTTGCAGCACTGGCTGCTGRGRACCCACGGTTTCGATCTCGTGTTGCTAATTCGAAGGGCGAAAGCAACAAAGTTTGCCC[C/T]CCAAAAATGCAGGGAACTAGGCAAAACTAATCCAACCACGTTGCACAGCAACGTGTGCGCACAGTAATTAAAGTTTTTTTTTGTTTT	[T/C]	X	10023425		IGU	0	0
TRXR-u-1b	TCGCGGTTGACTCAAGTCATGACGCATCCAGCTACCACAGATATGTTCWKTGTTTTC[G/T]TCGGTGAATTTGTCGCGATGCTCATGGCATTTTGCAGCACTGGCTGCTG	[A/C]	X	10023537		IGU	0	0
AGAMP3_X_10028394	ATTGCCCGGCGCGCGTAACACCACGCAATTATTGAAAGAAAATCACGCACACACACAAAC[A/C]CATCTTTCAACCTTTTCTCACTGTGTTGTGGTGTCGTCGAGGGTTACATTCGTGCATTCG	[A/C]	X	10028394			0	0
AGAMP3_X_10030118	AAGCACAGAGTTGTGTCGCGCTGTTTGGGGTTGCACACCGGTGAAATTGTGCGGCTCTCG[T/C]AGGAAAGGAAGGTTTCGTTGTTCATTGGCACAATCCAAAACGCTTCTTCATGGCGGCGGC	[T/C]	X	10030118		5UTR	0	1
AGAMP3_X_10032806	CGATCAATTCCCCATTTGTACGGTTTCTATTTCATCAGTATCAATGCGTCAGAGAGAAGG[A/G]AAGAAAACACACACAACAACTCAACAATACATGTGTATCGAAATTGCAAGTTGAAAACTT	[A/G]	X	10032806			0	0
AGAMP3_X_10185557	GGACGTGAGGTTCGGTGTGTCTGCTAGCGTCCACCAATCAACCTCTTACATCAATACCCC[A/G]AGCGCTCTGCTGGCTTTAGCAATTACCTGTTTTTTTCGGTCAAATTAGCGTGACAGATGA	[T/C]	X	10185557		IG	1	1
AGAMP3_X_11077161	GGGGCGCTTGCTGCTGAAGCGTGGCTGACAAATggggggggggCTTGAACAAATATTTGC[A/G]CACACGATAATGCTCTTGTTTGCCATGCGCTGACGGAAGACAAATCGCTGCAAGCGACGG	[A/G]	X	11077161			1	0
AGAMP3_X_12157004	CTATTCTATATTGTTCGGGTGAACAGCCAGCATCATTCTGTCTCTGTCAATTAAATGCTT[T/C]CGTTTGCGTTCTACCTTTGCGGGAGCAGTGATTCGCACTGCTCGTAATTTTTATTTTGCC	[A/G]	X	12157004		IG	1	1
AGAMP3_X_12995108	TTGCTTCCGGAGTGGACCGTCCAGAAGGATTGCAGAATTATCACTTCATCAGTCGGATAT[T/G]TATGCACGAGCGAGGGAAAAAAGTGATTGTTTTTTCTTGATTAGGGGATGAATTTATTTG	[A/C]	X	12995108		IG	1	1
AGAMP3_X_13782530	AGTTTAAAAGTGTTGTTCAGCTACCGTAAAACAAACGCTGCGATATTTGAAGCATTATTT[T/G]ATAAGAACAGCAGCCGGATCGTTGGATTGTACAACAAAAAAGCTGGTTTGAACATGCTTC	[A/C]	X	13782530		IGD	0	0
AGAMP3_X_13787446	TTCGTCGGTGCGGGTGAGAAGGTAGGATTGCATCGTGGCCAGCTGGGAGGCAGCCTCCTC[A/G]AGCTGCTGCCGATCGGATGTCGAGGTGGTGCTGGCGACCGACTGCACTGCCTTGTCCAAC	[T/C]	X	13787446		S	0	1
AGAMP3_X_13790297	TCCCCCAACCCCCTGCATTTAACGCTTCTTTTAAAATTAGTATCAAATTTGTAAACCTAC[T/C]GAAAACTACCGAAAAATGTTAAAGCTCCTACCGAAAATTACCGATTCAATTTTGGTGATC	[A/G]	X	13790297		IGU	0	1
AGAMP3_X_13790415	ATCCTTCCGATAACCGCCAAAATCATCTGGCCACACTGCCTGAGTTGTGACAGAGTTGTG[T/C]CAACGTGACAAATGGTTGTGTGCTGCCATAAAATCGTACAGTACTGTAGCATCAATGTGC	[A/G]	X	13790415		IGU	0	0
AGAMP3_X_14028670	AACAAAAGCACCAGAAGCAGCAACTTCTGGTTTCCGGCACAGCTCTTAAGCAGCGGCTGC[A/G]TACACTTTTCTTTGTTCAATTTTTCACCTCCACCATCACCACGGTAGCAATTATGGCGGA	[A/G]	X	14028670		IG	1	1
GPX4-U-snp1	GGATCCGACCCACGGYGTCAACTACACCCGCAGCCAGGGCGAGGTGTACTCGCAGATCGT[A/G]GAATCGCTGCAGAACAAAACGTTYATCGTCGCGTCCCGCATCGGTGCGCCGTTTCTTATG	[A/G]	X	14740632		S	0	1
AGAMP3_X_14742864	GGGCAACAACCGGTTCGAGGGCTACTCGCTCGAGCTGATCGATGGGATTTCGAAAATCCT[T/C]GGCTTCCAGTACCGGATGGAGCTGGTGCCGGACGGGAAGTACGGGTCGTACAATAAGGTG	[A/G]	X	14742864			0	0
GPX4-snp1	GGGTACGAACGCCGAGATCAAGCAGTTCGCTGTCGGCCGCGGCGCCAAGTACGACCTGTT[T/C]GCGAAGGTGGAYGTGAACGGGGACGATGCGCACCCGCTGTGGCAGTATCTGAAGCAGCGC	[T/C]	X	14745122			0	0
AGAMP3_X_14749350	GTTAGACAAGATTTAGCTTATTAGTGCGCAAGTAGCTGTGGCTGGAAAGGAACACAGTGC[A/T]AAAGGGGGAAGGACGTAAAACTTTTCCGCACCCACTTGCAAGACCTTGAACACATCGCCT	[A/T]	X	14749350		IG	0	0
AGAMP3_X_14984533	TTTCGCTCTCTTTCTATCTCTGTTTGTCATGCTTTCCGTTTAAGACTGGGCTATGGAGTT[A/G]AACAACCTAGAATAATAATGCTTCCATTGTCTGCCCAATCCTGGTATACATCGTAGCAGC	[A/G]	X	14984533		IG	1	0
CYP9K1-U-snp1	TACGTGTTAGTAAGCCGCCGACGACAGTCRAGTCTGTAAAATGTCTGATGATTACTTGTT[A/C]GTCTTTGTTATCGGTTGTAGAATCGCCCGCCCCCGCGCCA	[T/G]	X	15236081		IGD	0	1
AGAMP3_X_15242760	CAAGCGTACCCAACATGTTGTCTCTTAAACACACCTTAGAATTGTACTAACTGTACTATT[A/G]GAATTGTAGAATTGTAGTCCGGTGCGAACAGATACCAGAACCTTCAAATTTCGGGAATAT	[T/C]	X	15242760		IGU	0	1
AGAMP3_X_15243400	ACACAGGAGGTTTGGGGGTGAGGACTTTTTACGTTTGATAACGGGTCGTCCTCATCGTCA[A/T]GATAAGATATCACAGTGCCCGGTCATGATCTGCTTAATTTTTCCCGCTTTGTTTACACTC	[A/T]	X	15243400		IGU	0	1
db5567909	ACACTCTGTTACGGCCCGGTTCAATTGGTTGTTTTAGCACGGTGACTTGGCAGATTTGTT[C/G]TACGCTTGTGTCAAGTGTCACCATATTTGTTTATTTTTGTTTGCTCCCACTCCACT	[C/G]	X	15243515	rs5567909	IGU	0	0
AGAMP3_X_15247414	AATTTAATTTTTCAAATAACTTGTTTCATTTTTCGCCCTTATTTATGTGACCGGTCGTAC[T/C]TTACACGCTGCAACAGCTTTTTACACTCACTGCAACAGCTTCACACAGGTAGCAAGAGGG	[A/G]	X	15247414		IGU	0	1
AGAMP3_X_15986311	gtTTGAATGAATGCGGCAGATCCCTTTTGGATACGCGGGTGATTATTGATTTACTTCCAG[T/C]GTTGCACTTGCATCGGCGTTACGGTGCAAAGGGCAGAAGCAATTGTCCGCTTATCAGGCC	[A/G]	X	15986311		IG	1	1
db5289459	AGCGCAAGTGCAGCATGAATTGAGCTTGAGAATTTAGGGAGTTTTAAAAAGAAAAGAACG[G/T]AATAAAACCGTCATCTGTGCCCTTACCTGCGCTAAAATTCTGATGAAATCAGTATG	[A/C]	X	16616468	rs5289459	IGU	0	1
AGAMP3_X_16618210	ATCGTGCACGGCGAGTCGCATTCATTAACCGTTGCTGGGTTCAAGCGACCGGGCCAAGCG[A/T]GTTTGTGTCGTGTTCTTCGCCGTCGCTCAGTCGCCAGTTGTAAAGGTTCTCGTGGTCGTA	[T/A]	X	16618210		IGU	0	1
CYP4G17-snp2	CCATCAGCACGTGCAGGAGCAGGTGTACGCGGAGCTGCGCCAGATCTTTGGCGATTCGAA[A/G]CGGAAGGCCACCTTCGGCGACACGCTCGAGATGAAGTACCTGGAGCGGGTAATCTTCGAG	[T/C]	X	16619686			0	0
AGAMP3_X_16619749	CGAATCGCCAAAGATCTGGCGCAGCTCCGCGTACACCTGCTCCTGCACGTGCTGATGGAT[A/G]CCGAGCAGACACAGCACGAAGCTCGAACCGGCCGCCGTCGTATCGTGGCCCTCGAACATG	[A/G]	X	16619749		S	0	1
db5318892	TGAAGCTTCAAAGCTTTAGTAGAAGTGGTGCATCTCGCACGTGACTCCGTGATACGAATG[A/G]TCGATGTGAACAGTTATCTTGAACACGGTAATTCTAAATTGTAAATGTCCGTTTCT	[A/G]	X	16624102	rs5318892	IGU	0	1
AGAMP3_X_16737892	GGATGTCTTCGGAACACATTCACCGCATATCTCGGGAACGGACGGCATGTTCTCTTACTT[T/G]TTTCTTCTTCCAATGGTTTGTATTTCAAGCGTGTTTTTAAACGTCTTTTTTATTCGCAAG	[T/G]	X	16737892		IG	0	1
GSTt2-snp1	CGTCTTGCCGGCGTCCGGCTCCTTGCCCAGCAGCGGGTTTAGCCACACGTGGAAAAAGTA[T/C]AGCGACACGTCGGCGCGCAGGTTTAGGTGCTGCCAGGAAAGGTACTCGTCGACGCGTGCC	[A/G]	X	16747077	rs5298622	S	0	1
AGAMP3_X_16762368	TTTTATTTTGTTTTGGAAATTGCATCGAAAGATAGGAGAATATTATTATTACACAAACCT[T/G]CCTACCTCTTTACTGCACTTAAACTACCGTATTTTAGGTCACTGTACACTGGTAGTAACT	[A/C]	X	16762368		IG	0	1
AGAMP3_X_17023024	CTGCTGCGCATCAGCCGACTGTGGCGGTGAGCTTTCCCGTTGAACTAATGTAATTCGTGC[T/C]GCTTGGTCTTCCACCAGGTCCGGTCCAATCCACAGATGTGGGAGCACCGGGCAAAGGAGC	[A/G]	X	17023024		I	1	0
AGAMP3_X_18082030	AGTTCTAAAACAACAACAACCCTCTCTGCGTTGGCTCACGCTTTTAACCGGTCGCGCATG[T/C]GAGCGAATTGTTAAGAATTCATATGTGTAGGTGTGAGAGAGTTAATTCGATAGCGCACGA	[T/C]	X	18082030		IG	1	1
AGAMP3_X_18302273	GAAATTGGCTGGTGCATACGATTTGGTTGGTGGAATTTAAACAAATCGGCTGATTAGCCC[T/G]CCACATTATTACCTCATTATATTAGGCTCCGAGATATGGGTGGGATGAAGAGGAAGGAGG	[T/G]	X	18302273		IG	0	1
GSTu1-snp1	TGTGCTTTAACCTGGCCTTTCTCTATCCGCAAATATCCGCCTACGTAATGGCGCCGATCT[T/C]CTTCGACTACGAGCGCACCGCGATCGGGCTGAAGAAGCTGCACCTTGCCCTGGCTGCCTT	[A/G]	X	18315800		NS	0	1
AGAMa7-U-snp1	ATATGCTTAMTTGCAGGTTATAGATTGTTTTGGGGGCGTTAGTTGTAACATTTGCATGTT[T/C]CCCTTCCATTCTATCATTCGAACGTTGTGCGCAAGATCAGGGGTCAAAGAGTGTCGTTTT	[A/G]	X	18422254		IGD	1	1
AGAMb1-DOWN-snp1	TGTTGTGGTGTGTTTTGTTTGTTTTTGCTGTAAGACTTATCTCGATTTTTTCTTCTGATT[A/T]CTGACACAAATGGCACACCCACACACACTGAGAGGAGACACGCTCACTCGTGCATTCAAA	[T/A]	X	18564017		IGU	1	1
GPX3-1	GCCGGTGTACGTAAAATGGTCGATTGGCACGTCGATCGTTTTAsTCTGATACACGTAAGTGGCCGT[c/g]CCGTCCCGkACCGCAGCTGATAGTCCGGCGATAAGCGCGACCCATAGCGCAGCG	[C/G]	X	18983022			0	0
CYP307A1-START-snp1	GAAACCCCTCGCACGTCCTTACGCTMACGGCCTCTTACACCTTTTGGAGCTCTAACCGGA[T/C]CGGCTCGATCTGGTTGATATCCGATGGGGCCGATTGAACGGTCCTGGAGTTGCTGGGAGC	[T/C]	X	20010619		I	0	1
AGAMP3_X_20013808	AAAGGTAACACAATACAATCGCAGAGATAAATACAGCGCAGAAGTACAAGTAGATCAAAA[A/G]CGGCAAACTAAAACAGGTTGGTGGGTTTGCCATAATAATTAATGTATGTAGGnnnnnnnn	[T/C]	X	20013808		I	0	0
db5537982	CGATTCCGTATGAATCTGTACGATTAYGGACGGTTCTAGCGTGAGTGATTCAATCTACCC[C/T]TCCGAAATTTGATGAAACCGTCTGGACTCAGGTTGTTTTTTTGTTAATTTTGTCCA	[A/G]	X	20019474	rs5537982	IGD	0	1
db5537865	GGTAGATTGAATCACTCACGCTAGAACCGTCCRTAATCGTACAGATTCATACGGAATCGC[C/T]CGGAACCGTCAGGAATCGTTCGGAATGGCCCGGAATCGTTCAGAATCGCCTGAAGT	[A/G]	X	20019536	rs5537865	IGD	0	1
AGAMP3_X_22624304	ATATTAATTGCTACCATTTTACATTTTATATCTGATTGTAAAAATACCATTTCATTTGTG[A/G]AAAGATGGCACATGTTCGCTTCAAACATATCTATCATCCACCTAGAGGAGTGGTATGTGG	[T/C]	X	22624304		IG	1	1
AGAMP3_X_22675154	CTATCTACACGAGATCAACGCGATCAATTTCGAAACATCAAAACATTTGATATTATTTTT[A/C]GCGGTCCCaacacaatcattcacaccgtttcaccagaaaatatagtctctgataatggta	[T/G]	X	22675154		IG	1	0
AGAMP3_X_22776769	TTAAAAATATGAAATCAGAGTAAAAATATGCTTAGTCTGTTTGGCAAGTCAATTCTCAAT[T/G]TTGATAGCGGTGTTCATCGCTCACGAGATTGTTTTTGAAAAATATGTTAATAGTTGTGAC	[A/C]	X	22776769			1	0
AGAMP3_X_22858682	taaaaaagactcacaacacaatccgaacgctacaTTCCAAAATATTATTCGAACTTTTCC[A/G]TGCTAATTAAAAAAGACTAACCGAGTGAAAGTGAGTGCAGTGAAATGTTCGGAGCTAATG	[A/G]	X	22858682		IG	1	1
Cyp4G16-snp1	ACGCGAAAATTGCGCAGGATAGT[A/G]GACAAAATTATCTTTAGCTTTAACATAGCATATTTACGTCCTGAAAAAAGGAAGTAATGT	[A/G]	X	22938076		S	0	1
db5602362	AATAATAATTAGGGACAGTGTCCCAAAGTCTTGAGATAAAGTATGTTAAACCCGTATTTA[C/T]GGATAGAATGCATAGAATTTGACAGTGAGGCGAAATTAATTTTCATTTCTATTGCA	[A/G]	X	22939619	rs5602362	I	0	1
db5543028	ACTTGAAGAATCATTATTTTAGAATCATTCCCCAGTTCACATTGAGTTGAAATCAAGAAT[A/C]AAAGAAGAATAAGATGAGTTGATTAACTCATGAGCTAAGGTTAAAAACAAATGCAG	[A/C]	X	22942979	rs5543028		0	0
db5540763	TTTGAATAAAAGTTTTTTTTACATAATCTCCAACGTCTTTTAAGTATCTGAAGAAAAAAA[A/T]ATATGAGAAACACACACATGTGAAAGTTGACGTCTTCTCGTTTTGATTTTGAAAAT	[T/A]	X	22943444	rs5540763	I	0	0
Cyp4G16-3-snp1	AGTCTTAATTTACTATTTATTMAATACAACTTGTGCAATACCTCACATATGGAATATTTT[A/T]AACAACCCTCSGTAGTAATGTAATATTTTATTCATCTCGKGTTTCTTCTATGATTTATAA	[A/T]	X	22944643		I	0	0
Cyp4G16-3-snp2	AGGRATAAACAGCTTATTTATAGCGTAAATAATTATKGCTGAGTGGAAAATTATCTGAAC[A/G]GTTTTACATGTTTACTACTGTTTCGTAAAAAAAGTTAAATCGTGCTTGGTAGCGTTTTGT	[A/G]	X	22944824		I	0	1
AGAMP3_X_23102999	CCGAAGTTTGCATCAAGCGATAGGAAAAATTATATTGTTGCGAGACATAGACACTGCAGC[A/T]CAAAGAgtgcgtacaaacggcgtccacgggcctgcccacgcccgaatgcagagccgattg	[T/A]	X	23102999		IG	1	1
AGAMP3_X_23154881	ttgggactacgcggaagttcttttaaaacaatttgttGAGGATTTCGGTTTAATTTATGG[T/C]AAATCTCACATTACCAGTGAGAGTAATGTTCACAATCTGTACACATAGCTGAAGATGTAC	[T/C]	X	23154881		IG	1	0
MELAS2_diag	GTTGAGTGTAGCAAGGGATTGCGTGCCCCTTCCTCGATGGCGTA[A/T]TTAACCATCTTGGTCTGGGGACCGTGGTACCGTGCTCTGGT	[T/A]	X	24391151			1	0
ARBN_diag	TCCGTGTCAGACGAGTGACTTGACAT[A/T]GGATGGAGAAGGACACTTAACACTAATGAGCTTGTCGG	[A/T]	X	24391625			1	0
GAMB_diag	CTTGTCGGCGTGCCTCGTTCTCGACTTGATTGTCTTGATGTGAG[A/T]AACGTGCCGACCAAACCAGTAAGCTTACACAC	[A/T]	X	24391656			1	0
